# Supplementary material for: Myeloid-derived immunosuppression of chimeric antigen receptor T cells in the neuronal microenvironment of glioblastoma
Source: BMC Med. 2026 Mar 13;24:212. doi: 10.1186/s12916-026-04783-2 (PMC13063468; doi:10.1186/s12916-026-04783-2)
Supplement: Supplementary file 3 — Additional file 3. [file 12916_2026_4783_MOESM3_ESM.xlsx]

## Sheet: Table S1
Table S1. List of top markers of major celltypes identified
Threshold, avg_log2FC >=2 and p_val_adj <=0.01
	p_val	avg_log2FC	pct.1	pct.2	p_val_adj	cluster	gene
	0	3.95651	0.709	0.156	0	Tumor	CHI3L1
	0	4.47266	0.585	0.041	0	Tumor	MGST1
	0	3.22681	0.766	0.293	0	Tumor	CALD1
	0	2.27846	0.739	0.293	0	Tumor	IFITM3
	0	4.24893	0.462	0.022	0	Tumor	COL1A2
	0	3.89102	0.503	0.067	0	Tumor	GLIS3
	0	3.16472	0.665	0.235	0	Tumor	CNN3
	0	4.217	0.462	0.035	0	Tumor	SOX5
	0	5.00494	0.441	0.015	0	Tumor	GPC6
	0	4.66852	0.425	0.017	0	Tumor	SLPI
	0	4.72908	0.417	0.029	0	Tumor	PTPRG
	0	4.47088	0.407	0.019	0	Tumor	NNMT
	0	3.77463	0.465	0.08	0	Tumor	LRP1B
	0	4.1693	0.424	0.047	0	Tumor	CACNB2
	0	3.22087	0.457	0.083	0	Tumor	NME2
	0	4.24151	0.386	0.015	0	Tumor	PRR16
	0	2.18971	0.556	0.19	0	Tumor	CST3
	0	3.3014	0.577	0.211	0	Tumor	CDKN2A
	0	3.42601	0.479	0.137	0	Tumor	PAM
	0	3.35718	0.379	0.038	0	Tumor	SNHG29
	0	2.99049	0.504	0.167	0	Tumor	RAB13
	0	3.30925	0.526	0.195	0	Tumor	ID3
	0	4.63307	0.362	0.034	0	Tumor	GNG11
	0	4.44449	0.344	0.027	0	Tumor	IGFBP7
	0	3.90888	0.334	0.025	0	Tumor	TENM3
	0	2.68533	0.513	0.206	0	Tumor	SERPINE2
	0	3.59392	0.547	0.242	0	Tumor	TPM1
	0	4.17809	0.335	0.03	0	Tumor	RBFOX1
	0	4.07161	0.323	0.018	0	Tumor	SCG2
	0	3.3937	0.341	0.038	0	Tumor	EEF1G
	0	5.64537	0.307	0.004	0	Tumor	LINC01551
	0	4.62377	0.314	0.015	0	Tumor	RBMS3
	0	4.21166	0.342	0.045	0	Tumor	PALLD
	0	3.87982	0.317	0.02	0	Tumor	GAS5
	0	4.53217	0.309	0.013	0	Tumor	CCDC80
	0	3.95365	0.357	0.062	0	Tumor	PLOD2
	0	5.23865	0.313	0.019	0	Tumor	MGP
	0	3.98232	0.324	0.034	0	Tumor	VCAN
	0	3.57062	0.317	0.028	0	Tumor	MICOS10
	0	2.94	0.466	0.18	0	Tumor	MIR99AHG
	0	3.14691	0.352	0.068	0	Tumor	BNC2
	0	4.22848	0.355	0.077	0	Tumor	FN1
	0	4.31568	0.297	0.022	0	Tumor	TPD52L1
	0	3.51223	0.487	0.214	0	Tumor	ASPH
	0	3.56144	0.356	0.085	0	Tumor	GOLM1
	0	4.12696	0.288	0.019	0	Tumor	PDE10A
	0	2.93335	0.505	0.244	0	Tumor	PSD3
	0	3.31246	0.323	0.064	0	Tumor	RND3
	0	2.76167	0.46	0.205	0	Tumor	S100A13
	0	4.41698	0.263	0.008	0	Tumor	PDE3A
	0	2.04766	0.56	0.308	0	Tumor	MARCKS
	0	4.41977	0.26	0.01	0	Tumor	TNFRSF11B
	0	3.47552	0.334	0.084	0	Tumor	ACTN1
	0	3.75716	0.269	0.024	0	Tumor	PARD3
	0	4.26144	0.258	0.014	0	Tumor	CHL1
	0	3.436	0.344	0.101	0	Tumor	GMDS
	0	4.42806	0.265	0.024	0	Tumor	ANTXR1
	0	4.06518	0.258	0.017	0	Tumor	PI15
	0	3.72395	0.315	0.075	0	Tumor	C1R
	0	2.09862	0.329	0.09	0	Tumor	NRP1
	0	3.36585	0.349	0.113	0	Tumor	PBX1
	0	4.39085	0.244	0.008	0	Tumor	NKAIN3
	0	4.24465	0.243	0.01	0	Tumor	BICC1
	0	4.70354	0.239	0.01	0	Tumor	ARHGAP29
	0	4.61005	0.244	0.015	0	Tumor	ROBO2
	0	3.96085	0.243	0.016	0	Tumor	KCNE4
	0	3.92936	0.253	0.027	0	Tumor	CPE
	0	2.69856	0.393	0.167	0	Tumor	TRIO
	0	5.23149	0.238	0.013	0	Tumor	PDLIM1
	0	2.05235	0.431	0.209	0	Tumor	DCBLD2
	0	4.20015	0.229	0.007	0	Tumor	MMP16
	0	4.54188	0.23	0.009	0	Tumor	ZNF385D
	0	4.00666	0.257	0.038	0	Tumor	GPM6A
	0	3.96015	0.234	0.017	0	Tumor	COL14A1
	0	4.35777	0.224	0.007	0	Tumor	FSTL1
	0	4.52125	0.242	0.025	0	Tumor	ETV1
	0	2.87914	0.365	0.151	0	Tumor	ADAM12
	0	4.04102	0.22	0.007	0	Tumor	COL12A1
	0	3.94056	0.254	0.043	0	Tumor	COL4A5
	0	5.17685	0.215	0.004	0	Tumor	EGFR
	0	2.39325	0.438	0.228	0	Tumor	SMYD3
	0	5.37448	0.234	0.025	0	Tumor	PLCB4
	0	3.20182	0.302	0.096	0	Tumor	FHL1
	0	4.69134	0.209	0.003	0	Tumor	FOXG1
	0	3.28198	0.264	0.059	0	Tumor	CDK14
	0	3.68733	0.245	0.041	0	Tumor	EYA4
	0	2.7989	0.713	0.509	0	Tumor	RPL17
	0	5.4458	0.207	0.004	0	Tumor	COL8A1
	0	3.85237	0.238	0.036	0	Tumor	PPIC
	0	2.7826	0.582	0.38	0	Tumor	RPS17
	0	2.78017	0.325	0.125	0	Tumor	CAV1
	0	3.22301	0.221	0.022	0	Tumor	SNHG6
	0	4.41538	0.206	0.008	0	Tumor	LAMA4
	0	3.09855	0.283	0.085	0	Tumor	RCN1
	0	5.20799	0.207	0.01	0	Tumor	RIMS1
	0	4.36188	0.217	0.021	0	Tumor	THY1
	0	3.60256	0.231	0.036	0	Tumor	NEXN
	0	3.51311	0.232	0.037	0	Tumor	PLCB1
	0	4.28513	0.2	0.006	0	Tumor	GPX8
	0	3.70871	0.23	0.036	0	Tumor	DANT2
	0	3.04016	0.29	0.096	0	Tumor	PDE7B
	0	3.42804	0.222	0.029	0	Tumor	GULP1
	0	2.01155	0.434	0.241	0	Tumor	SPARC
	0	3.08561	0.236	0.044	0	Tumor	ZIC1
	0	4.29468	0.203	0.012	0	Tumor	COL3A1
	0	2.04333	0.324	0.133	0	Tumor	AKAP12
	0	4.35587	0.203	0.013	0	Tumor	IGFBP5
	0	3.29908	0.207	0.017	0	Tumor	IGFBP6
	0	2.74143	0.336	0.147	0	Tumor	TEAD1
	0	2.59594	0.322	0.133	0	Tumor	GNG12
	0	4.5889	0.199	0.01	0	Tumor	ZFPM2
	0	3.57915	0.245	0.056	0	Tumor	C1S
	0	3.99814	0.216	0.028	0	Tumor	FAM92A
	0	3.42223	0.232	0.045	0	Tumor	MID1
	0	3.80785	0.212	0.026	0	Tumor	KLHL13
	0	2.76722	0.305	0.119	0	Tumor	CTNNAL1
	0	3.10233	0.311	0.127	0	Tumor	KAZN
	0	5.95476	0.189	0.005	0	Tumor	TENM2
	0	4.78602	0.196	0.012	0	Tumor	SH2D4A
	0	3.11044	0.207	0.023	0	Tumor	SEPTIN2
	0	3.9233	0.217	0.034	0	Tumor	MRC2
	0	3.39136	0.212	0.031	0	Tumor	PID1
	0	2.07458	0.506	0.325	0	Tumor	ANXA1
	0	4.24766	0.185	0.006	0	Tumor	FAP
	0	2.54402	0.33	0.152	0	Tumor	IMMP2L
	0	4.61625	0.182	0.004	0	Tumor	HS3ST3A1
	0	2.63963	0.203	0.028	0	Tumor	CIAO2B
	0	3.14342	0.216	0.041	0	Tumor	CALCRL
	0	2.2419	0.303	0.128	0	Tumor	NLGN1
	0	4.67821	0.179	0.004	0	Tumor	FGF5
	0	4.68529	0.181	0.006	0	Tumor	CAP2
	0	4.05865	0.194	0.02	0	Tumor	EFEMP1
	0	3.85473	0.186	0.012	0	Tumor	COL5A2
	0	3.44184	0.256	0.084	0	Tumor	PRRX1
	0	5.68069	0.178	0.006	0	Tumor	DCLK1
	0	2.59874	0.321	0.15	0	Tumor	LSAMP
	0	3.50233	0.193	0.022	0	Tumor	FKBP10
	0	3.29937	0.22	0.049	0	Tumor	RALGPS2
	0	2.18436	0.423	0.252	0	Tumor	MT1E
	0	3.41543	0.188	0.017	0	Tumor	TOMM6
	0	3.69914	0.182	0.011	0	Tumor	SNHG5
	0	5.32571	0.173	0.003	0	Tumor	BDNF
	0	3.38733	0.221	0.052	0	Tumor	GGH
	0	3.77213	0.198	0.03	0	Tumor	LAMB1
	0	3.42626	0.225	0.058	0	Tumor	CDKN3
	0	4.10478	0.182	0.015	0	Tumor	NR2F1-AS1
	0	2.63573	0.354	0.187	0	Tumor	EIF4EBP1
	0	3.55848	0.184	0.02	0	Tumor	SLC44A5
	0	2.40697	0.381	0.217	0	Tumor	ENAH
	0	5.20162	0.167	0.004	0	Tumor	ARSJ
	0	5.08993	0.166	0.003	0	Tumor	STC1
	0	4.36634	0.17	0.007	0	Tumor	ASS1
	0	3.5159	0.176	0.013	0	Tumor	SNHG32
	0	4.29426	0.166	0.006	0	Tumor	CFI
	0	4.81888	0.166	0.006	0	Tumor	DIO2
	0	2.9537	0.204	0.044	0	Tumor	TRAPPC5
	0	3.80868	0.169	0.01	0	Tumor	EBF1
	0	2.32153	0.374	0.215	0	Tumor	SPIDR
	0	2.98686	0.233	0.075	0	Tumor	TENT5A
	0	4.42205	0.166	0.008	0	Tumor	TDO2
	0	3.14301	0.223	0.065	0	Tumor	ZNF521
	0	4.7816	0.172	0.014	0	Tumor	PTPRZ1
	0	3.11872	0.227	0.07	0	Tumor	PHLDA2
	0	3.69361	0.166	0.009	0	Tumor	BMERB1
	0	3.60245	0.204	0.047	0	Tumor	SERPINH1
	0	3.03069	0.174	0.017	0	Tumor	MICOS13
	0	3.08421	0.172	0.016	0	Tumor	RO60
	0	3.23624	0.174	0.019	0	Tumor	TFPI
	0	3.40535	0.208	0.053	0	Tumor	KCNAB1
	0	3.05843	0.205	0.05	0	Tumor	FNBP1L
	0	3.4819	0.201	0.047	0	Tumor	DENND2A
	0	3.07086	0.209	0.055	0	Tumor	FAM110B
	0	3.69991	0.164	0.01	0	Tumor	LUM
	0	5.01095	0.16	0.007	0	Tumor	PDZRN3
	0	3.17498	0.184	0.031	0	Tumor	PALM2-AKAP2
	0	4.30878	0.16	0.008	0	Tumor	NIBAN1
	0	4.3129	0.164	0.013	0	Tumor	LINC01411
	0	3.63789	0.18	0.03	0	Tumor	PTPN14
	0	3.85075	0.159	0.009	0	Tumor	AC073050.1
	0	4.44855	0.162	0.012	0	Tumor	CEMIP
	0	2.25409	0.609	0.459	0	Tumor	PDE4D
	0	4.75114	0.164	0.015	0	Tumor	TMEM108
	0	3.94506	0.187	0.038	0	Tumor	SRPX
	0	3.11125	0.174	0.025	0	Tumor	GPC5
	0	2.81135	0.161	0.015	0	Tumor	MIR100HG
	0	5.04374	0.15	0.004	0	Tumor	DDAH1
	0	3.56836	0.173	0.027	0	Tumor	MRPS24
	0	4.18745	0.161	0.016	0	Tumor	SRPX2
	0	4.20908	0.153	0.008	0	Tumor	FMN2
	0	4.22618	0.15	0.005	0	Tumor	CFAP299
	0	3.61703	0.181	0.036	0	Tumor	CCND1
	0	3.55714	0.165	0.022	0	Tumor	HRH1
	0	3.88706	0.165	0.022	0	Tumor	NR2F1
	0	3.30808	0.17	0.027	0	Tumor	PDLIM4
	0	3.59966	0.155	0.012	0	Tumor	RBIS
	0	4.79509	0.154	0.012	0	Tumor	RARRES2
	0	4.00775	0.155	0.013	0	Tumor	LOXL2
	0	4.62809	0.153	0.012	0	Tumor	FHL2
	0	4.2922	0.154	0.013	0	Tumor	SPARCL1
	0	3.9767	0.162	0.023	0	Tumor	EMP2
	0	3.97475	0.15	0.011	0	Tumor	ACSS3
	0	5.24295	0.141	0.003	0	Tumor	KIRREL1
	0	4.9076	0.142	0.004	0	Tumor	UNC5D
	0	3.99501	0.151	0.013	0	Tumor	COL4A2
	0	3.64004	0.156	0.019	0	Tumor	FGF13
	0	4.2686	0.138	0.003	0	Tumor	COL5A1
	0	3.96259	0.139	0.004	0	Tumor	DZIP1
	0	4.59222	0.147	0.012	0	Tumor	CACNA1C
	0	4.11765	0.147	0.014	0	Tumor	ALPK2
	0	4.44476	0.147	0.015	0	Tumor	DIAPH3
	0	3.29598	0.143	0.012	0	Tumor	GRIK2
	0	2.42928	0.691	0.564	0	Tumor	RPL36A
	0	4.26533	0.132	0.006	0	Tumor	PTCHD1-AS
	0	3.88203	0.132	0.006	0	Tumor	LINC01278
	0	2.46167	0.545	0.42	0	Tumor	PRDX4
	0	4.63685	0.129	0.005	0	Tumor	DOK5
	6.49021e-308	4.21615	0.124	0.004	1.93376e-303	Tumor	PALMD
	6.53837e-308	7.41772	0.127	0.006	1.94811e-303	Tumor	AC090833.1
	6.61585e-308	3.30076	0.195	0.047	1.97119e-303	Tumor	UST
	2.2479e-306	3.46798	0.135	0.009	6.69762e-302	Tumor	PLAAT4
	8.6917e-306	4.74766	0.131	0.008	2.58969e-301	Tumor	FAM155A
	1.05002e-305	3.03706	0.23	0.073	3.12852e-301	Tumor	HMGB3
	4.95258e-302	3.10343	0.151	0.019	1.47562e-297	Tumor	KCNQ5
	9.71248e-301	3.25246	0.195	0.049	2.89383e-296	Tumor	CENPW
	1.97894e-300	4.5561	0.161	0.027	5.89625e-296	Tumor	CADPS
	3.63921e-300	3.55805	0.188	0.044	1.0843e-295	Tumor	SETBP1
	4.23625e-297	6.82546	0.115	0.002	1.26219e-292	Tumor	CA9
	1.33249e-291	3.77562	0.167	0.032	3.97015e-287	Tumor	THBS1
	2.62162e-291	2.30233	0.231	0.076	7.81112e-287	Tumor	PRKD1
	1.08842e-290	4.16078	0.118	0.004	3.24294e-286	Tumor	EPHA5
	9.6584e-290	2.02356	0.326	0.165	2.87772e-285	Tumor	GABARAP
	4.46818e-289	3.97619	0.122	0.006	1.33129e-284	Tumor	TUSC3
	6.67435e-288	4.2168	0.128	0.009	1.98862e-283	Tumor	ARHGAP42
	1.03679e-287	4.34599	0.173	0.038	3.08912e-283	Tumor	COL6A1
	1.97039e-287	3.7821	0.141	0.016	5.87077e-283	Tumor	CFB
	2.07366e-286	2.66472	0.255	0.1	6.17848e-282	Tumor	EXT1
	2.7648e-284	3.16106	0.21	0.062	8.23772e-280	Tumor	TFPI2
	4.65525e-284	3.30443	0.153	0.025	1.38703e-279	Tumor	AC090204.1
	7.24424e-284	4.67025	0.125	0.009	2.15842e-279	Tumor	COL6A2
	1.08775e-283	2.74591	0.135	0.013	3.24095e-279	Tumor	AOPEP
	1.50073e-283	3.73956	0.144	0.019	4.47142e-279	Tumor	TMEM158
	3.7881e-283	4.72285	0.129	0.011	1.12867e-278	Tumor	STC2
	2.0525e-281	5.35632	0.108	0.001	6.11543e-277	Tumor	HOXC10
	4.85779e-281	2.69049	0.265	0.113	1.44738e-276	Tumor	RBFOX2
	4.05607e-280	3.01829	0.196	0.053	1.20851e-275	Tumor	PLK2
	5.64956e-276	4.8666	0.13	0.013	1.68329e-271	Tumor	NRXN1
	2.33651e-275	3.39273	0.13	0.012	6.96165e-271	Tumor	KIF26B
	3.27223e-275	3.34711	0.17	0.037	9.74962e-271	Tumor	ANGPT1
	9.29576e-275	2.96213	0.183	0.046	2.76967e-270	Tumor	NEK6
	4.17683e-274	2.70823	0.265	0.114	1.24449e-269	Tumor	SCMH1
	6.36144e-274	4.76005	0.128	0.012	1.89539e-269	Tumor	ABI3BP
	3.18366e-273	5.47526	0.11	0.003	9.48571e-269	Tumor	EFNA5
	4.29315e-273	3.47594	0.116	0.005	1.27915e-268	Tumor	CCN1
	4.05349e-272	3.72538	0.159	0.031	1.20774e-267	Tumor	TSPAN6
	1.32531e-270	2.45789	0.267	0.115	3.94877e-266	Tumor	TTC28
	2.59064e-270	2.04771	0.303	0.144	7.71883e-266	Tumor	ID1
	3.53456e-270	4.54441	0.131	0.015	1.05312e-265	Tumor	MEST
	6.80902e-269	2.68586	0.144	0.021	2.02875e-264	Tumor	TUBB3
	2.3779e-268	3.40013	0.121	0.009	7.08497e-264	Tumor	SNHG14
	2.88536e-268	5.02842	0.113	0.005	8.59693e-264	Tumor	ADORA2B
	3.24716e-267	2.98991	0.197	0.058	9.67493e-263	Tumor	PAWR
	7.9381e-267	3.88182	0.115	0.006	2.36516e-262	Tumor	AC109466.1
	4.59822e-266	5.13754	0.111	0.004	1.37004e-261	Tumor	EVA1A
	6.6187e-266	4.86416	0.11	0.004	1.97204e-261	Tumor	COL4A1
	3.42167e-265	3.29976	0.15	0.027	1.01949e-260	Tumor	CYR61
	8.52192e-265	9.45097	0.103	0.001	2.53911e-260	Tumor	AC016205.1
	2.9325e-263	2.49406	0.329	0.19	8.73739e-259	Tumor	CD320
	5.44823e-263	2.48868	0.208	0.067	1.6233e-258	Tumor	MYOF
	2.20425e-262	4.52323	0.122	0.011	6.56758e-258	Tumor	TSPAN9
	5.9014e-262	3.59545	0.136	0.019	1.75832e-257	Tumor	PARVA
	7.85152e-262	2.12717	0.384	0.245	2.33936e-257	Tumor	ZEB1
	2.80162e-261	3.61973	0.114	0.007	8.34744e-257	Tumor	PCDH7
	7.65519e-261	3.66618	0.116	0.008	2.28086e-256	Tumor	SEPTIN11
	8.92452e-261	3.44742	0.113	0.006	2.65906e-256	Tumor	MIR31HG
	8.60486e-260	5.16596	0.105	0.003	2.56382e-255	Tumor	VCAM1
	2.38264e-259	3.07182	0.177	0.046	7.09907e-255	Tumor	HCG17
	7.05812e-258	5.2762	0.111	0.007	2.10297e-253	Tumor	SORBS2
	1.35468e-257	3.31436	0.216	0.078	4.03626e-253	Tumor	AGT
	5.74838e-257	4.61799	0.104	0.003	1.71273e-252	Tumor	GFRA1
	6.15599e-257	2.14871	0.366	0.228	1.83418e-252	Tumor	FAF1
	9.76592e-257	2.658	0.166	0.037	2.90976e-252	Tumor	CA12
	1.26258e-256	4.41876	0.116	0.009	3.76185e-252	Tumor	IL11
	6.44426e-255	4.18331	0.12	0.011	1.92007e-250	Tumor	TGFB2
	1.12865e-254	4.03057	0.122	0.012	3.36283e-250	Tumor	RBPMS
	9.30907e-254	3.84563	0.107	0.005	2.77364e-249	Tumor	COX7A1
	3.86153e-252	2.38054	0.224	0.082	1.15054e-247	Tumor	CSRP2
	1.68154e-251	4.90837	0.1	0.002	5.01016e-247	Tumor	PXDN
	9.73504e-251	4.40118	0.11	0.007	2.90056e-246	Tumor	SAMD5
	1.26511e-248	5.18026	0.108	0.006	3.76938e-244	Tumor	NRN1
	6.58579e-248	4.29739	0.104	0.004	1.96224e-243	Tumor	STEAP1
	9.51294e-248	2.9519	0.144	0.026	2.83438e-243	Tumor	C1orf21
	2.05387e-247	3.96954	0.152	0.032	6.11951e-243	Tumor	TNC
	1.17349e-246	3.45398	0.141	0.025	3.49641e-242	Tumor	GLI3
	2.43581e-245	2.68545	0.209	0.073	7.25749e-241	Tumor	DKK3
	4.29875e-244	4.22999	0.103	0.005	1.28081e-239	Tumor	WWC1
	5.70837e-243	3.25442	0.109	0.007	1.70081e-238	Tumor	SNHG16
	1.15647e-242	4.77214	0.1	0.003	3.4457e-238	Tumor	BMPER
	2.99895e-242	3.09573	0.186	0.057	8.93537e-238	Tumor	GCNT1
	4.8305e-241	2.01514	0.366	0.229	1.43925e-236	Tumor	NFIB
	2.001e-240	3.9663	0.125	0.017	5.96197e-236	Tumor	GPR176
	1.06128e-238	4.58105	0.119	0.014	3.1621e-234	Tumor	IGF2BP3
	1.64569e-238	2.87952	0.165	0.043	4.90333e-234	Tumor	SDK1
	4.0114e-238	2.48847	0.226	0.087	1.1952e-233	Tumor	LRP1
	9.03e-238	3.79298	0.102	0.005	2.69049e-233	Tumor	LIN7A
	1.64393e-237	2.89005	0.249	0.112	4.89809e-233	Tumor	NECTIN3
	1.82002e-237	5.21667	0.096	0.002	5.42276e-233	Tumor	GJA1
	8.3364e-237	3.4598	0.109	0.009	2.48383e-232	Tumor	MTLN
	1.3689e-235	5.12036	0.1	0.005	4.07865e-231	Tumor	IL33
	1.77529e-234	3.46155	0.101	0.005	5.28948e-230	Tumor	MRTFB
	2.98737e-234	3.52319	0.124	0.017	8.90086e-230	Tumor	NTN4
	5.55415e-234	4.11719	0.101	0.005	1.65486e-229	Tumor	ATRNL1
	9.31254e-234	4.14033	0.097	0.003	2.77467e-229	Tumor	MFAP4
	2.95925e-233	4.12001	0.096	0.003	8.81709e-229	Tumor	PLSCR4
	3.17949e-233	2.92239	0.119	0.014	9.47328e-229	Tumor	TMEM35B
	3.05694e-232	2.99097	0.108	0.009	9.10816e-228	Tumor	TASOR2
	1.42948e-231	2.6526	0.19	0.063	4.25914e-227	Tumor	GNG10
	2.48212e-231	3.51729	0.101	0.006	7.39547e-227	Tumor	SNHG3
	1.05118e-230	3.68848	0.126	0.02	3.132e-226	Tumor	STON2
	2.71318e-230	2.41097	0.282	0.147	8.08392e-226	Tumor	DPYSL3
	5.00673e-230	4.30909	0.096	0.004	1.49175e-225	Tumor	CREB3L1
	6.36284e-230	4.64515	0.109	0.01	1.89581e-225	Tumor	RAB27B
	2.79257e-229	4.27898	0.097	0.004	8.32047e-225	Tumor	LINGO2
	4.01452e-229	5.29997	0.091	0.001	1.19613e-224	Tumor	COL4A6
	5.43691e-229	2.8766	0.169	0.047	1.61993e-224	Tumor	NT5E
	3.36656e-228	2.33719	0.269	0.131	1.00307e-223	Tumor	CACNA2D1
	3.77471e-228	5.05217	0.114	0.013	1.12467e-223	Tumor	PTX3
	7.78747e-228	3.31978	0.134	0.025	2.32028e-223	Tumor	CDKN2B-AS1
	9.61574e-228	4.06264	0.104	0.008	2.86501e-223	Tumor	FHOD3
	1.36132e-227	3.5746	0.14	0.028	4.05606e-223	Tumor	KIAA1217
	5.1784e-227	3.82495	0.096	0.004	1.5429e-222	Tumor	AL139393.3
	7.15774e-227	3.88876	0.115	0.014	2.13265e-222	Tumor	DLGAP5
	8.21783e-227	2.60357	0.113	0.012	2.4485e-222	Tumor	DIPK1A
	1.32786e-226	3.25825	0.105	0.008	3.95636e-222	Tumor	COA8
	5.97398e-226	10.5043	0.087	0	1.77995e-221	Tumor	KRT80
	1.38703e-224	3.81438	0.109	0.012	4.13266e-220	Tumor	PBK
	1.25402e-223	4.15552	0.119	0.017	3.73634e-219	Tumor	TPBG
	1.30773e-223	4.93147	0.118	0.017	3.89639e-219	Tumor	GFAP
	4.34527e-223	2.50155	0.222	0.091	1.29467e-218	Tumor	CENPP
	3.54571e-222	2.21136	0.285	0.152	1.05644e-217	Tumor	CNTLN
	6.63111e-222	3.836	0.156	0.042	1.97574e-217	Tumor	NLGN4X
	1.28236e-221	3.75098	0.095	0.005	3.8208e-217	Tumor	ST6GALNAC5
	5.56734e-221	4.74729	0.095	0.005	1.65879e-216	Tumor	AR
	1.16656e-220	4.11951	0.103	0.009	3.47578e-216	Tumor	LOXL1
	1.78139e-220	4.82543	0.088	0.002	5.30766e-216	Tumor	LINC01239
	2.73712e-220	4.45069	0.091	0.003	8.15525e-216	Tumor	AL033504.1
	8.46625e-220	3.5418	0.093	0.004	2.52252e-215	Tumor	STAC
	1.21217e-219	4.39688	0.095	0.005	3.61165e-215	Tumor	LDB2
	2.07629e-219	2.12628	0.282	0.146	6.18631e-215	Tumor	NPAS3
	8.61643e-219	4.13562	0.094	0.005	2.56727e-214	Tumor	THSD7A
	1.04553e-218	2.96395	0.107	0.011	3.11516e-214	Tumor	GET3
	1.22006e-218	4.01395	0.091	0.003	3.63516e-214	Tumor	STEAP2
	1.37203e-218	4.1029	0.108	0.012	4.08796e-214	Tumor	HAS2
	2.21945e-218	3.15114	0.145	0.034	6.61285e-214	Tumor	DLGAP1
	1.54797e-217	2.2041	0.237	0.104	4.61219e-213	Tumor	FAT1
	1.64997e-217	5.13781	0.087	0.002	4.91608e-213	Tumor	ADAMTS9
	6.08429e-217	2.27342	0.122	0.019	1.81281e-212	Tumor	CERT1
	1.56625e-216	4.30726	0.089	0.003	4.66665e-212	Tumor	AC083870.1
	1.62058e-216	3.57565	0.11	0.013	4.82852e-212	Tumor	AMPH
	2.02505e-216	2.73793	0.188	0.065	6.03363e-212	Tumor	YAP1
	3.74535e-216	2.41659	0.186	0.063	1.11593e-211	Tumor	FRMD6
	5.65627e-215	2.88085	0.102	0.009	1.68529e-210	Tumor	TLE5
	7.67164e-213	5.2967	0.089	0.003	2.28576e-208	Tumor	AC019117.1
	5.14215e-212	4.53578	0.089	0.003	1.5321e-207	Tumor	KCNT2
	5.09291e-211	2.97994	0.1	0.009	1.51743e-206	Tumor	TASOR
	8.2537e-211	3.59889	0.128	0.026	2.45919e-206	Tumor	TMEM178B
	1.8279e-210	4.41118	0.109	0.014	5.44623e-206	Tumor	KCNIP4
	3.60141e-210	3.24526	0.108	0.013	1.07304e-205	Tumor	ABHD17C
	5.81992e-210	2.92395	0.187	0.067	1.73405e-205	Tumor	CRIM1
	6.20421e-209	5.18526	0.09	0.005	1.84854e-204	Tumor	THSD4
	9.79982e-209	3.35042	0.115	0.018	2.91986e-204	Tumor	PHLDB2
	1.20752e-208	7.80297	0.081	0	3.59782e-204	Tumor	AC090791.1
	1.80094e-208	3.79173	0.098	0.008	5.36589e-204	Tumor	NRG1
	7.19837e-208	2.7264	0.292	0.169	2.14475e-203	Tumor	STXBP5
	1.68312e-207	4.22032	0.099	0.009	5.01485e-203	Tumor	TMTC1
	6.16744e-207	3.73555	0.119	0.02	1.83759e-202	Tumor	PLA2G4A
	1.6674e-206	2.72058	0.214	0.091	4.96803e-202	Tumor	AFAP1
	1.93561e-206	4.88055	0.108	0.014	5.76715e-202	Tumor	SAA1
	3.83623e-206	4.14642	0.084	0.002	1.14301e-201	Tumor	BRINP1
	9.44537e-206	2.84631	0.143	0.035	2.81425e-201	Tumor	EFEMP2
	4.29276e-205	2.00087	0.305	0.178	1.27903e-200	Tumor	GPHN
	5.1454e-205	3.7107	0.089	0.005	1.53307e-200	Tumor	BMPR1B
	1.3873e-204	2.97156	0.116	0.019	4.13345e-200	Tumor	BIRC5
	8.32307e-204	4.78657	0.085	0.003	2.47986e-199	Tumor	CRISPLD1
	1.03471e-203	2.57882	0.22	0.095	3.08292e-199	Tumor	MAGI3
	1.14486e-203	3.92439	0.09	0.005	3.41112e-199	Tumor	NEBL
	1.07847e-201	2.84832	0.19	0.071	3.2133e-197	Tumor	FILIP1L
	9.00043e-201	3.31899	0.113	0.018	2.68168e-196	Tumor	ENC1
	1.70728e-200	2.83683	0.173	0.058	5.08685e-196	Tumor	CPNE8
	2.55118e-200	2.42058	0.315	0.2	7.60124e-196	Tumor	VCL
	1.79552e-199	3.84469	0.087	0.005	5.34975e-195	Tumor	SAMD11
	1.11924e-198	2.29785	0.333	0.221	3.33478e-194	Tumor	TOMM5
	1.43849e-198	4.52243	0.081	0.002	4.28598e-194	Tumor	HSPB6
	3.10722e-198	2.96875	0.097	0.009	9.25796e-194	Tumor	FAM174C
	6.6297e-198	3.38489	0.108	0.016	1.97532e-193	Tumor	LZTS1
	7.72135e-198	2.78209	0.16	0.049	2.30058e-193	Tumor	NR6A1
	1.42676e-197	2.93031	0.172	0.06	4.25103e-193	Tumor	BCAR3
	1.77878e-196	4.63682	0.087	0.005	5.29988e-192	Tumor	NRG3
	4.10274e-196	3.58153	0.147	0.042	1.22241e-191	Tumor	TSHZ2
	4.97797e-196	2.94603	0.173	0.06	1.48319e-191	Tumor	ST5
	1.22711e-195	3.44016	0.085	0.004	3.65619e-191	Tumor	NUP42
	4.81603e-194	2.84728	0.163	0.053	1.43494e-189	Tumor	ATP8B1
	8.18914e-194	4.9298	0.083	0.004	2.43995e-189	Tumor	NMU
	1.22686e-193	3.18477	0.091	0.007	3.65541e-189	Tumor	LINC01619
	5.0648e-193	3.19279	0.091	0.008	1.50906e-188	Tumor	MRTFA
	5.60312e-193	2.65917	0.178	0.063	1.66945e-188	Tumor	MPP6
	4.55803e-192	2.31591	0.104	0.014	1.35806e-187	Tumor	DLEU1
	4.99245e-192	3.69453	0.093	0.009	1.4875e-187	Tumor	SNAP25
	1.31567e-191	4.36472	0.08	0.002	3.92005e-187	Tumor	SNHG17
	2.29799e-191	3.16724	0.089	0.007	6.84685e-187	Tumor	OIP5-AS1
	2.59402e-191	2.33581	0.304	0.19	7.7289e-187	Tumor	MAGED1
	1.81793e-190	2.89231	0.136	0.035	5.41653e-186	Tumor	ITGA3
	1.89771e-190	3.61611	0.108	0.018	5.65422e-186	Tumor	GNG12-AS1
	4.56526e-190	3.21609	0.135	0.035	1.36022e-185	Tumor	P3H2
	5.15414e-190	4.00199	0.105	0.016	1.53568e-185	Tumor	PTGFRN
	5.82861e-190	3.6386	0.1	0.013	1.73664e-185	Tumor	KRT18
	4.00692e-189	3.04755	0.09	0.008	1.19386e-184	Tumor	ITPRID2
	1.92537e-188	3.1447	0.184	0.073	5.73663e-184	Tumor	CACNA1A
	6.45431e-188	3.86596	0.086	0.006	1.92306e-183	Tumor	LINC00472
	1.38878e-187	3.0801	0.145	0.042	4.13788e-183	Tumor	LMO7
	9.08355e-187	2.52369	0.235	0.116	2.70644e-182	Tumor	MAP3K20
	1.22805e-186	2.10915	0.263	0.143	3.65897e-182	Tumor	PTGR1
	1.37579e-186	4.156	0.076	0.002	4.09915e-182	Tumor	RERG
	3.72176e-186	3.18656	0.115	0.022	1.1089e-181	Tumor	CDCA2
	1.0553e-185	3.65578	0.089	0.008	3.14426e-181	Tumor	PRTG
	9.91185e-185	2.12748	0.278	0.159	2.95324e-180	Tumor	CMSS1
	1.99919e-184	4.54824	0.083	0.005	5.95659e-180	Tumor	CHRM3
	3.58218e-184	2.80582	0.123	0.028	1.06731e-179	Tumor	AL138828.1
	9.49504e-184	3.55082	0.104	0.017	2.82905e-179	Tumor	VEGFC
	6.95382e-182	4.82973	0.079	0.004	2.07189e-177	Tumor	ADIRF
	7.79687e-182	3.57559	0.111	0.021	2.32308e-177	Tumor	CCNB2
	3.61278e-181	3.64447	0.122	0.029	1.07643e-176	Tumor	CHSY3
	1.5235e-180	2.46856	0.115	0.023	4.53928e-176	Tumor	FKBP7
	2.76817e-180	3.60044	0.1	0.015	8.24776e-176	Tumor	UBE2C
	5.43213e-180	2.38102	0.239	0.122	1.6185e-175	Tumor	RAI14
	1.44493e-179	4.37932	0.079	0.004	4.30516e-175	Tumor	IGDCC4
	1.55506e-179	2.39309	0.208	0.094	4.63329e-175	Tumor	DENND5B
	2.96551e-179	2.87432	0.084	0.007	8.83574e-175	Tumor	LINC01578
	1.28712e-178	3.22738	0.081	0.005	3.83496e-174	Tumor	DOP1A
	1.24018e-177	5.90213	0.072	0.002	3.69511e-173	Tumor	FST
	2.862e-177	3.12876	0.119	0.027	8.52734e-173	Tumor	MELK
	4.32826e-177	2.59092	0.18	0.072	1.28961e-172	Tumor	TSPAN4
	6.23586e-177	3.14303	0.116	0.025	1.85797e-172	Tumor	PPM1E
	1.16384e-176	3.16762	0.102	0.017	3.46767e-172	Tumor	LOX
	3.67133e-176	4.12125	0.075	0.003	1.09387e-171	Tumor	NCBP2AS2
	3.20231e-175	4.2835	0.079	0.005	9.54129e-171	Tumor	MOXD1
	4.95539e-175	3.75418	0.079	0.005	1.47646e-170	Tumor	KCND2
	7.50302e-175	3.24977	0.08	0.006	2.23552e-170	Tumor	PANTR1
	1.07313e-174	3.4243	0.09	0.011	3.1974e-170	Tumor	ARHGEF28
	1.4437e-174	2.93621	0.192	0.083	4.30152e-170	Tumor	SMAD1
	1.88232e-174	3.48086	0.088	0.01	5.60836e-170	Tumor	PTK7
	1.94789e-174	4.2137	0.075	0.003	5.80373e-170	Tumor	NID1
	5.14613e-174	4.1443	0.084	0.008	1.53329e-169	Tumor	PCOLCE2
	9.47163e-174	3.65367	0.076	0.004	2.82207e-169	Tumor	SHROOM3
	1.32172e-173	4.12229	0.074	0.003	3.93807e-169	Tumor	C6orf141
	8.64022e-173	2.65805	0.09	0.011	2.57435e-168	Tumor	SEPTIN10
	5.86936e-172	4.52555	0.114	0.026	1.74877e-167	Tumor	DCLK2
	4.13751e-171	2.77664	0.162	0.058	1.23277e-166	Tumor	DDR2
	1.61113e-170	3.55792	0.079	0.006	4.80036e-166	Tumor	ADAMTSL4-AS1
	2.7859e-170	2.53948	0.212	0.101	8.3006e-166	Tumor	SERPINE1
	6.68194e-170	2.40839	0.17	0.066	1.99088e-165	Tumor	AXL
	9.29368e-170	2.39543	0.174	0.069	2.76905e-165	Tumor	PARD3B
	1.32665e-169	4.33429	0.07	0.002	3.95274e-165	Tumor	AC090578.1
	1.36567e-169	3.87277	0.073	0.003	4.06903e-165	Tumor	ADAMTS9-AS2
	3.31328e-169	4.43	0.079	0.006	9.87191e-165	Tumor	ADGRA3
	1.28787e-168	4.19411	0.088	0.011	3.83721e-164	Tumor	NPAS2
	2.98216e-168	4.08991	0.072	0.003	8.88535e-164	Tumor	AL008633.1
	4.3954e-168	3.11176	0.126	0.034	1.30961e-163	Tumor	TEX14
	1.95843e-167	2.82063	0.17	0.066	5.83514e-163	Tumor	COLEC12
	2.59379e-167	2.8669	0.167	0.065	7.72819e-163	Tumor	UBE2T
	1.71135e-166	4.16172	0.067	0.001	5.09898e-162	Tumor	TMEM100
	1.75072e-165	2.6772	0.208	0.102	5.21627e-161	Tumor	NDUFA7
	2.02003e-165	3.21002	0.103	0.02	6.01869e-161	Tumor	PAPPA2
	1.66507e-164	2.81127	0.141	0.045	4.96106e-160	Tumor	SLC25A43
	5.54162e-164	2.15171	0.173	0.067	1.65112e-159	Tumor	PCSK5
	1.02165e-163	3.14524	0.098	0.017	3.04401e-159	Tumor	ITGA11
	4.7814e-163	3.69667	0.074	0.005	1.42462e-158	Tumor	CZIB
	2.20923e-162	3.27907	0.097	0.017	6.58241e-158	Tumor	CDHR3
	3.24178e-162	2.74864	0.135	0.042	9.65888e-158	Tumor	ABCC3
	3.84147e-162	4.16421	0.069	0.002	1.14457e-157	Tumor	CCL26
	4.79976e-162	3.88623	0.068	0.002	1.43009e-157	Tumor	AL162493.1
	6.88138e-162	4.24093	0.071	0.003	2.05031e-157	Tumor	PDGFRA
	7.26498e-162	4.21704	0.066	0.001	2.1646e-157	Tumor	FIBIN
	1.06268e-161	2.12902	0.095	0.015	3.16625e-157	Tumor	CIAO2A
	1.27596e-161	2.07941	0.198	0.09	3.80171e-157	Tumor	CDKN2C
	1.50603e-161	3.93572	0.08	0.008	4.48722e-157	Tumor	PYGO1
	2.22298e-161	4.77382	0.065	0.001	6.62338e-157	Tumor	HOXA10
	3.61278e-160	3.67732	0.07	0.004	1.07643e-155	Tumor	TWIST1
	8.37215e-160	3.4136	0.1	0.02	2.49448e-155	Tumor	OSBPL6
	1.09863e-159	2.74227	0.151	0.054	3.27336e-155	Tumor	MIR222HG
	1.40013e-159	4.40901	0.066	0.002	4.17169e-155	Tumor	LINC01138
	1.4058e-158	2.84516	0.117	0.031	4.18858e-154	Tumor	CTGF
	1.63122e-158	4.17566	0.086	0.012	4.86023e-154	Tumor	AC078923.1
	2.32156e-158	2.62234	0.082	0.01	6.9171e-154	Tumor	PRORP
	4.11996e-158	2.18544	0.18	0.075	1.22754e-153	Tumor	RAB34
	5.71661e-158	3.16189	0.114	0.03	1.70326e-153	Tumor	PLCH1
	6.42021e-158	3.94233	0.075	0.006	1.9129e-153	Tumor	COL11A1
	8.78792e-158	2.16555	0.183	0.077	2.61836e-153	Tumor	CENPF
	1.85315e-157	2.80913	0.146	0.05	5.52147e-153	Tumor	TOX
	3.98565e-157	3.22063	0.112	0.028	1.18752e-152	Tumor	SEMA3A
	2.55343e-156	3.16695	0.122	0.035	7.60794e-152	Tumor	KRT7
	2.79908e-156	2.76644	0.108	0.025	8.33986e-152	Tumor	FGF2
	5.87956e-156	4.76535	0.075	0.007	1.75182e-151	Tumor	PAPPA
	5.88604e-156	3.09315	0.075	0.007	1.75375e-151	Tumor	GARS-DT
	6.00011e-156	3.66646	0.099	0.02	1.78773e-151	Tumor	AFF3
	1.01735e-155	6.79575	0.064	0.002	3.03118e-151	Tumor	IBSP
	5.01216e-155	6.11451	0.063	0.001	1.49337e-150	Tumor	EDNRA
	5.07926e-155	2.77092	0.114	0.03	1.51337e-150	Tumor	AC092691.1
	8.13792e-155	3.61334	0.079	0.009	2.42469e-150	Tumor	RGS7
	1.79168e-154	5.48417	0.068	0.003	5.33831e-150	Tumor	MECOM
	1.88834e-154	3.38704	0.089	0.015	5.62632e-150	Tumor	GUCY1A2
	6.85394e-154	3.46243	0.066	0.003	2.04213e-149	Tumor	YAE1
	1.29716e-153	5.01523	0.073	0.006	3.86489e-149	Tumor	FGF14
	1.97598e-153	3.22904	0.067	0.003	5.88743e-149	Tumor	PRSS12
	5.90476e-153	3.96184	0.098	0.021	1.75932e-148	Tumor	SLC35F1
	6.07587e-153	5.47775	0.063	0.002	1.81031e-148	Tumor	SIX1
	1.17921e-152	4.52112	0.063	0.001	3.51346e-148	Tumor	MIR924HG
	2.46673e-152	2.91733	0.115	0.031	7.34963e-148	Tumor	CACNB4
	5.21188e-152	2.84129	0.139	0.048	1.55288e-147	Tumor	CNIH3
	1.06163e-151	2.30228	0.185	0.082	3.16312e-147	Tumor	PKIB
	1.16345e-151	2.72426	0.113	0.03	3.46649e-147	Tumor	TMEM45A
	2.04487e-151	4.08896	0.079	0.01	6.0927e-147	Tumor	AC090579.1
	2.21821e-151	3.34139	0.071	0.005	6.60914e-147	Tumor	ILRUN
	2.80485e-151	3.70147	0.069	0.005	8.35704e-147	Tumor	SFRP4
	5.36656e-151	3.8368	0.068	0.004	1.59897e-146	Tumor	GUCY1A1
	1.03996e-150	2.31996	0.155	0.059	3.09856e-146	Tumor	CRNDE
	5.97973e-150	3.43471	0.103	0.024	1.78166e-145	Tumor	FIRRE
	1.1032e-149	2.62015	0.135	0.045	3.287e-145	Tumor	PXMP2
	1.13868e-149	3.02135	0.073	0.007	3.39269e-145	Tumor	RAB30-DT
	1.73332e-149	3.72231	0.076	0.009	5.16444e-145	Tumor	LRRC17
	4.28328e-149	3.16432	0.069	0.005	1.2762e-144	Tumor	LINC-PINT
	1.128e-148	4.6558	0.066	0.004	3.36089e-144	Tumor	MFAP2
	3.19297e-148	3.91753	0.064	0.003	9.51347e-144	Tumor	AC114971.1
	4.19958e-148	4.34163	0.071	0.006	1.25126e-143	Tumor	EDN1
	1.02323e-147	3.45166	0.067	0.004	3.04871e-143	Tumor	AC007098.1
	2.09244e-147	2.76954	0.073	0.007	6.23443e-143	Tumor	DENND10
	3.29856e-147	3.01015	0.11	0.029	9.82806e-143	Tumor	CDK2AP1
	6.98947e-147	3.49958	0.087	0.015	2.08251e-142	Tumor	CADPS2
	7.28902e-147	3.89184	0.074	0.008	2.17176e-142	Tumor	SNTG1
	1.38303e-146	2.65426	0.178	0.08	4.12075e-142	Tumor	SVIL
	2.94857e-145	2.82629	0.095	0.02	8.78528e-141	Tumor	PAM16
	4.60985e-145	3.56834	0.091	0.018	1.3735e-140	Tumor	PLXNA4
	8.05896e-145	3.22308	0.072	0.007	2.40117e-140	Tumor	TXNDC5
	1.37647e-144	4.57043	0.064	0.003	4.10119e-140	Tumor	IGFBP2
	1.39933e-144	3.22388	0.084	0.014	4.16932e-140	Tumor	TPM2
	1.46065e-144	2.21308	0.228	0.126	4.352e-140	Tumor	KIAA1958
	4.25292e-144	5.02985	0.06	0.002	1.26716e-139	Tumor	AC037486.1
	6.21249e-144	2.72689	0.193	0.094	1.85101e-139	Tumor	TASP1
	6.97354e-144	4.18456	0.064	0.004	2.07777e-139	Tumor	LBP
	1.13795e-143	2.94926	0.073	0.008	3.39051e-139	Tumor	AC007319.1
	1.43968e-143	3.86314	0.092	0.019	4.28954e-139	Tumor	STS
	2.53438e-143	2.52602	0.176	0.08	7.55119e-139	Tumor	SNX7
	4.69245e-143	3.56199	0.062	0.002	1.39811e-138	Tumor	LINC02798
	5.156e-143	3.02705	0.106	0.028	1.53623e-138	Tumor	MIR181A2HG
	6.08211e-143	2.92206	0.117	0.034	1.81217e-138	Tumor	OSBPL10
	7.34657e-143	2.67106	0.123	0.039	2.18891e-138	Tumor	CLMP
	8.34416e-143	4.22279	0.068	0.006	2.48614e-138	Tumor	EPHA3
	1.25409e-142	3.84619	0.058	0.001	3.73656e-138	Tumor	FOXG1-AS1
	2.81404e-141	2.74684	0.113	0.032	8.38442e-137	Tumor	SLC16A2
	4.09529e-141	2.10366	0.159	0.066	1.22019e-136	Tumor	ANGPTL4
	1.1767e-140	3.03688	0.079	0.012	3.50599e-136	Tumor	AP001347.1
	2.14431e-140	2.84971	0.109	0.03	6.38897e-136	Tumor	FBXO17
	3.32798e-140	2.89665	0.132	0.046	9.91573e-136	Tumor	CCDC102B
	1.94567e-139	4.00911	0.057	0.001	5.79713e-135	Tumor	HOXA7
	2.14994e-139	4.3651	0.059	0.002	6.40574e-135	Tumor	HS6ST2
	2.55969e-139	2.61278	0.142	0.054	7.62659e-135	Tumor	TLE1
	2.90177e-139	2.52106	0.227	0.129	8.64583e-135	Tumor	WLS
	6.64061e-139	2.53894	0.068	0.006	1.97857e-134	Tumor	GET1
	1.13898e-138	3.18066	0.092	0.02	3.39359e-134	Tumor	POLR2J3
	1.88157e-138	3.59277	0.062	0.004	5.60613e-134	Tumor	GIHCG
	1.95028e-138	3.72505	0.059	0.002	5.81087e-134	Tumor	ADCY8
	2.56298e-138	5.25781	0.059	0.002	7.63639e-134	Tumor	ZNF423
	6.22158e-138	2.29769	0.262	0.165	1.85372e-133	Tumor	SMARCA1
	8.28887e-138	2.33783	0.111	0.032	2.46967e-133	Tumor	ASPM
	1.43536e-137	2.06122	0.236	0.132	4.27666e-133	Tumor	RDH10
	2.38723e-137	2.18901	0.146	0.056	7.11275e-133	Tumor	ARHGAP6
	6.85205e-137	9.98697	0.053	0	2.04157e-132	Tumor	RPRML
	8.39905e-137	2.63036	0.07	0.007	2.5025e-132	Tumor	CCDC18-AS1
	1.96564e-136	2.17822	0.193	0.095	5.85662e-132	Tumor	SCFD2
	2.12446e-136	5.29189	0.054	0	6.32984e-132	Tumor	FOXF2
	2.44746e-136	3.86799	0.065	0.006	7.29221e-132	Tumor	ABCF2
	2.49343e-136	4.32088	0.061	0.003	7.42918e-132	Tumor	TBX15
	5.51894e-136	2.26182	0.143	0.055	1.64437e-131	Tumor	KANK2
	7.06622e-136	3.10025	0.094	0.022	2.10538e-131	Tumor	MTCL1
	1.27547e-135	3.36353	0.096	0.023	3.80026e-131	Tumor	CDH6
	2.90057e-135	2.77595	0.144	0.056	8.64225e-131	Tumor	F3
	6.54318e-135	3.09595	0.066	0.006	1.94954e-130	Tumor	PINX1
	1.12487e-134	2.04771	0.306	0.218	3.35154e-130	Tumor	INAFM1
	2.41817e-134	4.90479	0.059	0.003	7.20494e-130	Tumor	VSNL1
	4.02078e-134	2.22276	0.16	0.068	1.19799e-129	Tumor	AK4
	1.32692e-133	2.46026	0.216	0.12	3.95355e-129	Tumor	TCF7L2
	1.96189e-133	2.93943	0.148	0.062	5.84545e-129	Tumor	EPDR1
	4.2645e-133	3.52928	0.064	0.006	1.27061e-128	Tumor	AL357507.1
	4.36181e-133	3.40274	0.074	0.011	1.2996e-128	Tumor	P3H3
	8.33393e-133	2.9695	0.101	0.027	2.48309e-128	Tumor	BMP1
	1.55442e-132	3.52096	0.063	0.005	4.6314e-128	Tumor	AL078604.4
	1.88698e-132	2.17762	0.235	0.139	5.62226e-128	Tumor	FAM20C
	2.76279e-132	2.25904	0.138	0.053	8.23172e-128	Tumor	PCLAF
	5.21259e-132	2.55174	0.27	0.181	1.55309e-127	Tumor	HS2ST1
	5.57657e-132	3.3708	0.068	0.008	1.66154e-127	Tumor	AL355916.1
	1.35501e-131	4.28613	0.06	0.004	4.03724e-127	Tumor	FAM189A1
	2.02576e-131	2.50406	0.232	0.14	6.03575e-127	Tumor	UBE2V1
	1.17544e-130	2.45823	0.078	0.013	3.50223e-126	Tumor	ITGBL1
	2.14528e-130	3.46041	0.057	0.002	6.39185e-126	Tumor	LINC02742
	8.06123e-130	2.84543	0.081	0.016	2.40184e-125	Tumor	BSCL2
	1.21479e-129	2.29727	0.167	0.076	3.61946e-125	Tumor	FBN1
	1.21954e-129	3.8297	0.06	0.004	3.63363e-125	Tumor	AC015871.1
	1.90413e-129	4.8316	0.053	0.001	5.67334e-125	Tumor	LYPD6
	2.08925e-129	4.93879	0.057	0.003	6.22493e-125	Tumor	SULF1
	4.47796e-129	4.06463	0.061	0.005	1.33421e-124	Tumor	TARID
	4.78671e-129	2.24037	0.159	0.07	1.4262e-124	Tumor	CARMIL1
	5.90998e-129	4.16169	0.06	0.004	1.76088e-124	Tumor	PPP1R1C
	1.81491e-128	4.04887	0.067	0.008	5.40752e-124	Tumor	SYBU
	1.93038e-128	3.23041	0.075	0.012	5.75156e-124	Tumor	FRZB
	2.68358e-128	5.39199	0.051	0	7.99572e-124	Tumor	ARX
	4.96284e-128	3.53301	0.081	0.016	1.47868e-123	Tumor	FLG-AS1
	5.7601e-128	3.9218	0.054	0.002	1.71622e-123	Tumor	FAM160A1
	6.52848e-128	3.49769	0.095	0.024	1.94516e-123	Tumor	HEY1
	1.31784e-127	4.37007	0.059	0.004	3.92652e-123	Tumor	AC002074.1
	1.74447e-127	4.05608	0.07	0.01	5.19763e-123	Tumor	DMRTA2
	1.77571e-127	2.50253	0.124	0.045	5.29072e-123	Tumor	RAB23
	2.03113e-127	4.70904	0.061	0.005	6.05176e-123	Tumor	RDH10-AS1
	2.3417e-127	3.29239	0.086	0.019	6.9771e-123	Tumor	CDC20
	2.39308e-127	3.18218	0.063	0.006	7.13019e-123	Tumor	AC068051.1
	3.89279e-127	3.13165	0.058	0.003	1.15986e-122	Tumor	C5orf56
	7.86426e-127	5.97506	0.053	0.002	2.34316e-122	Tumor	LINC00473
	1.71428e-126	3.32318	0.058	0.004	5.10769e-122	Tumor	DANCR
	2.17423e-126	3.34859	0.06	0.005	6.47813e-122	Tumor	SHFL
	3.34878e-126	3.28323	0.093	0.024	9.97769e-122	Tumor	NHS
	4.56493e-126	3.44613	0.069	0.009	1.36012e-121	Tumor	DIRAS3
	9.22443e-126	2.74623	0.108	0.033	2.74842e-121	Tumor	NCAPG
	2.28719e-125	2.67583	0.108	0.033	6.81468e-121	Tumor	DNM1
	2.73039e-125	2.86364	0.062	0.006	8.1352e-121	Tumor	SLC49A4
	5.62701e-125	5.01395	0.05	0	1.67657e-120	Tumor	LINC01956
	6.62514e-125	3.76033	0.061	0.006	1.97396e-120	Tumor	PPARGC1A
	8.97091e-125	2.72879	0.112	0.036	2.67288e-120	Tumor	S100A2
	8.98415e-125	2.83862	0.126	0.047	2.67683e-120	Tumor	PRICKLE2
	1.02297e-124	2.87638	0.077	0.014	3.04795e-120	Tumor	LINC01505
	1.04092e-124	3.115	0.06	0.005	3.10141e-120	Tumor	DMAC2L
	2.56113e-124	3.51354	0.057	0.004	7.63089e-120	Tumor	NPR3
	2.79686e-124	2.65899	0.106	0.032	8.33323e-120	Tumor	AC113383.1
	5.06985e-124	3.37397	0.056	0.003	1.51056e-119	Tumor	GALNT5
	1.07938e-123	2.63907	0.135	0.054	3.21601e-119	Tumor	WDR34
	1.30599e-123	4.68172	0.055	0.003	3.89119e-119	Tumor	OTX1
	3.0636e-123	4.02278	0.053	0.002	9.12801e-119	Tumor	RBMS3-AS2
	4.4015e-123	4.40105	0.057	0.004	1.31143e-118	Tumor	C1QL1
	1.19206e-122	4.16103	0.051	0.001	3.55174e-118	Tumor	CCN2
	2.33199e-122	2.17761	0.133	0.052	6.94816e-118	Tumor	PRSS23
	3.20476e-122	2.03069	0.288	0.201	9.54859e-118	Tumor	TMEM161B-AS1
	3.36662e-122	2.73874	0.133	0.052	1.00308e-117	Tumor	DBN1
	3.70961e-122	3.30812	0.055	0.003	1.10528e-117	Tumor	MTRES1
	4.27256e-122	3.15604	0.132	0.052	1.27301e-117	Tumor	CCNB1
	4.29569e-122	3.46077	0.053	0.002	1.2799e-117	Tumor	WARS2-AS1
	2.36628e-121	3.16943	0.086	0.02	7.05032e-117	Tumor	AMOTL1
	2.3869e-121	3.35249	0.067	0.01	7.11176e-117	Tumor	ZIC4
	4.65593e-121	3.20597	0.09	0.023	1.38724e-116	Tumor	MSRB3
	4.92133e-121	5.37361	0.048	0	1.46631e-116	Tumor	MKX
	2.48836e-120	2.83681	0.081	0.018	7.41407e-116	Tumor	KITLG
	3.16562e-120	3.14505	0.052	0.002	9.43195e-116	Tumor	TRPC4
	3.31324e-120	3.17494	0.057	0.004	9.8718e-116	Tumor	TUG1
	4.45414e-120	2.74437	0.094	0.026	1.32711e-115	Tumor	IRS1
	8.58367e-120	2.25096	0.34	0.274	2.5575e-115	Tumor	OXR1
	1.18964e-119	3.9151	0.06	0.006	3.54454e-115	Tumor	ADD2
	1.24977e-119	2.71798	0.104	0.032	3.72369e-115	Tumor	ZNF503
	4.62287e-119	2.00522	0.217	0.126	1.37738e-114	Tumor	UACA
	4.75909e-119	2.25156	0.065	0.009	1.41797e-114	Tumor	RELCH
	5.5961e-119	3.22066	0.056	0.004	1.66736e-114	Tumor	SEPTIN9
	9.09499e-119	2.78998	0.114	0.039	2.70985e-114	Tumor	STEAP3
	1.00962e-118	5.34531	0.048	0.001	3.00816e-114	Tumor	AC009518.1
	1.481e-118	3.39518	0.083	0.02	4.41265e-114	Tumor	DEPDC1
	6.00626e-118	4.97595	0.055	0.004	1.78956e-113	Tumor	NTN1
	6.36938e-118	3.11537	0.083	0.02	1.89776e-113	Tumor	HMMR
	7.77906e-118	2.86809	0.087	0.022	2.31777e-113	Tumor	KIF4A
	1.0055e-117	3.0211	0.055	0.004	2.99589e-113	Tumor	AC079781.5
	1.89678e-117	4.07662	0.048	0.001	5.65146e-113	Tumor	PTGFR
	1.15961e-116	2.56798	0.06	0.007	3.45507e-112	Tumor	AL354740.1
	1.24077e-116	4.30986	0.05	0.002	3.69687e-112	Tumor	HPD
	1.25471e-116	3.08812	0.09	0.024	3.73841e-112	Tumor	KIF23
	1.35387e-116	3.34501	0.075	0.015	4.03386e-112	Tumor	KIF14
	1.80134e-116	2.62442	0.153	0.07	5.3671e-112	Tumor	SLC39A14
	2.92946e-116	2.11818	0.222	0.133	8.72832e-112	Tumor	UAP1
	3.06228e-116	2.81926	0.083	0.02	9.12407e-112	Tumor	AHNAK2
	3.13142e-116	4.96946	0.047	0.001	9.33007e-112	Tumor	FBLN1
	3.64858e-116	4.08893	0.049	0.002	1.08709e-111	Tumor	BOC
	4.18172e-116	2.44915	0.105	0.034	1.24594e-111	Tumor	RNF150
	1.10766e-115	3.32726	0.065	0.01	3.30029e-111	Tumor	NID2
	2.72749e-115	2.25416	0.192	0.105	8.12654e-111	Tumor	NGRN
	3.9441e-115	3.33915	0.058	0.006	1.17514e-110	Tumor	COBLL1
	1.79879e-114	4.39483	0.05	0.002	5.3595e-110	Tumor	LINC01515
	2.17985e-114	5.21198	0.05	0.002	6.49485e-110	Tumor	AC090568.2
	3.73647e-114	2.62817	0.138	0.06	1.11328e-109	Tumor	PDK4
	3.99743e-114	8.21272	0.045	0	1.19104e-109	Tumor	AC063979.2
	5.1775e-114	2.3237	0.064	0.009	1.54264e-109	Tumor	HIF1A-AS3
	1.14478e-113	4.4192	0.05	0.003	3.41087e-109	Tumor	MME
	1.20611e-113	3.11331	0.053	0.004	3.59362e-109	Tumor	SCO2
	1.64844e-113	2.11645	0.256	0.171	4.91154e-109	Tumor	HIBADH
	2.08194e-113	2.62303	0.133	0.056	6.20313e-109	Tumor	MYH10
	4.39733e-113	2.39165	0.061	0.008	1.31019e-108	Tumor	MAP4K3-DT
	6.02005e-113	5.42619	0.045	0	1.79367e-108	Tumor	AL161431.1
	9.27348e-113	2.49871	0.109	0.038	2.76303e-108	Tumor	LINC01473
	1.1187e-112	4.23798	0.049	0.002	3.33317e-108	Tumor	AC107021.1
	1.47067e-112	3.98981	0.062	0.009	4.38186e-108	Tumor	SLC4A4
	2.05375e-112	3.61484	0.054	0.005	6.11915e-108	Tumor	SNAP25-AS1
	2.21388e-112	2.17958	0.263	0.181	6.59625e-108	Tumor	MSRA
	1.64058e-111	4.19406	0.048	0.002	4.88812e-107	Tumor	ARMC4
	4.1058e-111	3.35078	0.066	0.011	1.22332e-106	Tumor	DZIP1L
	4.3015e-111	3.54186	0.046	0.001	1.28163e-106	Tumor	HOXA3
	4.34269e-111	3.01783	0.108	0.038	1.29391e-106	Tumor	CP
	1.27902e-110	3.22544	0.077	0.017	3.81084e-106	Tumor	GNAL
	2.09533e-110	4.88622	0.049	0.003	6.24305e-106	Tumor	PRICKLE1
	3.88597e-110	2.61811	0.063	0.009	1.15783e-105	Tumor	HES1
	4.29216e-110	3.73472	0.048	0.002	1.27885e-105	Tumor	COL21A1
	6.60942e-109	2.32283	0.162	0.079	1.96928e-104	Tumor	CD109
	7.05205e-109	2.62954	0.052	0.004	2.10116e-104	Tumor	KLHL29
	7.39864e-109	3.48754	0.046	0.002	2.20443e-104	Tumor	AL390783.1
	1.0787e-108	3.00416	0.049	0.003	3.214e-104	Tumor	ARMCX5-GPRASP2
	1.49838e-108	3.91183	0.047	0.002	4.46443e-104	Tumor	SCN1A-AS1
	2.6574e-108	4.29189	0.052	0.004	7.91771e-104	Tumor	SMAD6
	3.70911e-108	4.53552	0.044	0.001	1.10513e-103	Tumor	DUXAP8
	1.29235e-107	4.4907	0.045	0.001	3.85056e-103	Tumor	PITX1
	8.14175e-107	3.01382	0.053	0.005	2.42584e-102	Tumor	GPC4
	9.83954e-107	4.64595	0.05	0.004	2.93169e-102	Tumor	KIF7
	1.41505e-106	3.50652	0.043	0.001	4.21613e-102	Tumor	EN1
	1.5351e-106	3.34461	0.06	0.009	4.57384e-102	Tumor	DNAH11
	1.93288e-106	2.21965	0.113	0.042	5.75901e-102	Tumor	ROR1
	5.97995e-106	2.80104	0.075	0.017	1.78173e-101	Tumor	LAMA5
	1.45317e-105	2.3676	0.062	0.01	4.32971e-101	Tumor	PRXL2A
	1.88801e-105	3.90537	0.051	0.004	5.62533e-101	Tumor	GASK1B
	2.96512e-105	2.15367	0.17	0.088	8.83458e-101	Tumor	CRIP2
	3.41813e-105	3.68081	0.071	0.015	1.01843e-100	Tumor	FLRT2
	3.73817e-105	2.94424	0.095	0.03	1.11379e-100	Tumor	TGFB1I1
	2.0243e-104	3.04471	0.054	0.006	6.03141e-100	Tumor	ARHGAP28
	2.68542e-104	2.29996	0.199	0.118	8.00121e-100	Tumor	COX16
	3.35004e-104	4.34506	0.043	0.001	9.98144e-100	Tumor	EPHA5-AS1
	5.87874e-104	3.37276	0.05	0.004	1.75157e-99	Tumor	OBI1
	9.68314e-104	3.6368	0.044	0.002	2.88509e-99	Tumor	LINC02609
	1.57969e-103	3.0904	0.074	0.018	4.7067e-99	Tumor	ECM2
	3.07764e-103	2.71086	0.118	0.048	9.16983e-99	Tumor	OPHN1
	6.26372e-103	5.01007	0.043	0.001	1.86627e-98	Tumor	RGS4
	6.39942e-103	3.30768	0.064	0.012	1.90671e-98	Tumor	C1orf53
	6.81553e-103	5.39218	0.043	0.001	2.03069e-98	Tumor	FOXC1
	6.92742e-103	3.22185	0.066	0.013	2.06402e-98	Tumor	ULBP2
	1.04729e-102	3.70806	0.045	0.002	3.12039e-98	Tumor	AC119673.2
	1.36406e-102	2.7887	0.078	0.02	4.06421e-98	Tumor	CDH4
	1.63537e-102	2.1911	0.153	0.077	4.87259e-98	Tumor	EML1
	1.66913e-102	4.7037	0.049	0.004	4.97317e-98	Tumor	TCF7L1
	1.68723e-102	8.70889	0.041	0	5.02709e-98	Tumor	NGF
	1.90517e-102	2.46327	0.143	0.067	5.67645e-98	Tumor	SLC35G2
	2.81586e-102	3.03132	0.087	0.026	8.38986e-98	Tumor	IPO9-AS1
	3.89297e-102	3.23884	0.113	0.045	1.15991e-97	Tumor	CYP1B1
	4.88775e-102	2.66756	0.077	0.02	1.4563e-97	Tumor	SUGCT
	1.05658e-101	3.75226	0.054	0.007	3.14808e-97	Tumor	C1QTNF1
	3.05949e-101	2.70776	0.045	0.002	9.11574e-97	Tumor	TEAD2
	3.52621e-101	3.79201	0.051	0.006	1.05063e-96	Tumor	MYPN
	5.67534e-101	2.08513	0.059	0.009	1.69097e-96	Tumor	PRXL2C
	6.32261e-101	4.95875	0.042	0.001	1.88382e-96	Tumor	TBX2-AS1
	1.19951e-100	2.50701	0.094	0.031	3.57394e-96	Tumor	KNL1
	3.42994e-100	2.65967	0.118	0.048	1.02195e-95	Tumor	AC027031.2
	3.43019e-100	2.11631	0.237	0.157	1.02203e-95	Tumor	NEDD4
	6.84607e-100	2.00983	0.269	0.192	2.03979e-95	Tumor	SLC25A37
	1.98646e-99	2.67541	0.099	0.035	5.91866e-95	Tumor	TSHZ3
	4.8868e-99	4.30305	0.053	0.007	1.45602e-94	Tumor	PRDM5
	6.86294e-99	7.69648	0.04	0.001	2.04481e-94	Tumor	GABRA2
	8.6892e-99	2.8016	0.074	0.019	2.58895e-94	Tumor	ESCO2
	8.78823e-98	2.8918	0.071	0.017	2.61845e-93	Tumor	PAGR1
	1.27652e-97	4.9726	0.039	0	3.80338e-93	Tumor	HOXD10
	1.88965e-97	8.93623	0.038	0	5.63021e-93	Tumor	AL355596.1
	2.50618e-97	3.50591	0.051	0.006	7.46717e-93	Tumor	SLC2A10
	4.08207e-97	2.62607	0.049	0.005	1.21625e-92	Tumor	PWWP3A
	6.01507e-97	3.64601	0.051	0.006	1.79219e-92	Tumor	NALCN-AS1
	9.09964e-97	3.00698	0.042	0.002	2.71124e-92	Tumor	LMO3
	9.23996e-97	3.41432	0.072	0.018	2.75305e-92	Tumor	STK33
	9.29478e-97	2.79805	0.066	0.014	2.76938e-92	Tumor	JAM2
	1.23961e-96	5.80949	0.048	0.005	3.69343e-92	Tumor	SAA2
	1.29083e-96	3.0667	0.07	0.017	3.84604e-92	Tumor	TTK
	1.40454e-96	2.66848	0.149	0.075	4.18484e-92	Tumor	MCC
	1.76075e-96	3.87972	0.045	0.003	5.24615e-92	Tumor	ADAMTS5
	1.93473e-96	3.70788	0.042	0.002	5.76452e-92	Tumor	ZNF433-AS1
	2.4171e-96	2.78201	0.077	0.021	7.20175e-92	Tumor	SHCBP1
	2.50294e-96	4.59831	0.044	0.003	7.45752e-92	Tumor	PKNOX2
	4.80206e-96	9.17994	0.038	0	1.43077e-91	Tumor	LINP1
	5.14911e-96	3.99025	0.044	0.003	1.53418e-91	Tumor	GLIS1
	5.47508e-96	2.66995	0.051	0.006	1.6313e-91	Tumor	AL050309.1
	7.47486e-96	2.54899	0.092	0.031	2.22713e-91	Tumor	HOXB7
	8.60633e-96	3.30743	0.059	0.011	2.56426e-91	Tumor	SPC25
	1.10005e-95	2.14136	0.147	0.073	3.27761e-91	Tumor	GFPT2
	1.14651e-95	3.13165	0.086	0.027	3.41603e-91	Tumor	THBS4
	1.29718e-95	3.43325	0.053	0.007	3.86493e-91	Tumor	FAM78B
	1.65555e-95	2.54516	0.156	0.081	4.93271e-91	Tumor	TPX2
	1.91985e-95	4.49571	0.039	0.001	5.72018e-91	Tumor	LINC01611
	3.51613e-95	4.45946	0.039	0.001	1.04763e-90	Tumor	AC023095.1
	4.52388e-95	3.47262	0.043	0.002	1.34789e-90	Tumor	FAM153CP
	5.34556e-95	5.06192	0.043	0.002	1.59271e-90	Tumor	COL13A1
	8.95304e-95	2.17968	0.177	0.098	2.66756e-90	Tumor	EPAS1
	2.08878e-94	3.39814	0.068	0.016	6.22351e-90	Tumor	SCN8A
	2.14435e-94	2.61533	0.088	0.03	6.3891e-90	Tumor	PVR
	2.16239e-94	3.22709	0.044	0.003	6.44284e-90	Tumor	AP000331.1
	2.50016e-94	4.61402	0.04	0.001	7.44924e-90	Tumor	DPT
	2.94022e-94	2.13619	0.137	0.065	8.76039e-90	Tumor	ABCC4
	3.6661e-94	3.13404	0.043	0.003	1.09232e-89	Tumor	AC009120.2
	4.90242e-94	4.42366	0.076	0.021	1.46068e-89	Tumor	NPY
	5.29958e-94	2.81327	0.047	0.004	1.57901e-89	Tumor	MMUT
	7.75143e-94	2.49923	0.075	0.02	2.30954e-89	Tumor	ESRRG
	7.98668e-94	3.59842	0.069	0.017	2.37963e-89	Tumor	TGFB3
	3.72711e-93	2.84644	0.091	0.032	1.11049e-88	Tumor	SELENBP1
	5.04045e-93	5.60438	0.04	0.001	1.5018e-88	Tumor	AQP4
	5.10108e-93	4.4035	0.04	0.002	1.51987e-88	Tumor	EPHA2
	2.31996e-92	5.95225	0.037	0	6.91231e-88	Tumor	LINC01638
	3.11696e-92	3.25104	0.04	0.002	9.28699e-88	Tumor	LINC02802
	3.21452e-92	4.19883	0.045	0.004	9.57767e-88	Tumor	ADAMTS10
	3.242e-92	5.24603	0.04	0.002	9.65955e-88	Tumor	AL109930.1
	4.0681e-92	7.31396	0.037	0.001	1.21209e-87	Tumor	LINC01111
	5.78851e-92	3.2767	0.053	0.008	1.72469e-87	Tumor	BCAM
	9.40675e-92	3.07387	0.087	0.029	2.80274e-87	Tumor	SPDYA
	9.67058e-92	4.16552	0.051	0.007	2.88135e-87	Tumor	OPCML
	1.26733e-91	2.53211	0.047	0.005	3.77602e-87	Tumor	ZNRD2
	1.5756e-91	3.99767	0.045	0.004	4.69449e-87	Tumor	TIMP3
	2.0834e-91	5.29589	0.038	0.001	6.20749e-87	Tumor	SNAI2
	4.21399e-91	3.37526	0.042	0.003	1.25556e-86	Tumor	NIBAN2
	5.04457e-91	3.10512	0.068	0.017	1.50303e-86	Tumor	SOD3
	8.62873e-91	3.56405	0.047	0.005	2.57093e-86	Tumor	SBSPON
	9.46736e-91	2.11729	0.152	0.079	2.8208e-86	Tumor	SATB2
	1.0534e-90	3.18547	0.04	0.002	3.13861e-86	Tumor	HULC
	1.14997e-90	3.51655	0.04	0.002	3.42634e-86	Tumor	ZNF875
	1.52713e-90	4.32626	0.04	0.002	4.55008e-86	Tumor	FRAS1
	1.60081e-90	4.25621	0.04	0.002	4.7696e-86	Tumor	CLDN10
	1.79434e-90	2.35093	0.111	0.047	5.34623e-86	Tumor	IMPA2
	1.86155e-90	3.35838	0.041	0.002	5.54648e-86	Tumor	AC046134.2
	2.51056e-90	3.17631	0.08	0.025	7.48022e-86	Tumor	LGR4
	3.44003e-90	3.29529	0.039	0.002	1.02496e-85	Tumor	TENM3-AS1
	4.03502e-90	4.9948	0.039	0.002	1.20223e-85	Tumor	TM4SF18
	5.20961e-90	3.03959	0.04	0.002	1.5522e-85	Tumor	PCCA-DT
	9.99684e-90	2.88589	0.065	0.015	2.97856e-85	Tumor	AC244131.2
	1.6713e-89	7.60849	0.036	0	4.97964e-85	Tumor	AC090124.1
	1.84956e-89	2.53437	0.102	0.04	5.51078e-85	Tumor	EHD2
	1.87e-89	3.03483	0.041	0.002	5.57167e-85	Tumor	COX10-AS1
	2.64128e-89	3.89437	0.036	0.001	7.86968e-85	Tumor	HOXD11
	6.80186e-89	3.88084	0.097	0.038	2.02662e-84	Tumor	FABP7
	8.00763e-89	2.89468	0.062	0.014	2.38587e-84	Tumor	AC073529.1
	1.12239e-88	4.55405	0.042	0.003	3.34417e-84	Tumor	EPHB4
	1.7123e-88	2.85966	0.042	0.003	5.10179e-84	Tumor	AC005562.1
	2.20804e-88	2.47277	0.06	0.013	6.57886e-84	Tumor	CD24
	2.47801e-88	4.58932	0.045	0.005	7.38324e-84	Tumor	PLA2R1
	2.49818e-88	3.31651	0.039	0.002	7.44334e-84	Tumor	ABITRAM
	2.81129e-88	2.43391	0.103	0.041	8.37623e-84	Tumor	KHDC1
	4.14736e-88	4.09658	0.039	0.002	1.23571e-83	Tumor	AC211433.1
	4.24668e-88	2.63099	0.072	0.02	1.2653e-83	Tumor	PDE8B
	5.48512e-88	4.30269	0.056	0.011	1.63429e-83	Tumor	TCEA3
	5.96188e-88	3.00814	0.041	0.003	1.77634e-83	Tumor	ZFPM2-AS1
	8.82821e-88	3.18502	0.039	0.002	2.63036e-83	Tumor	SNHG30
	1.2801e-87	4.73741	0.037	0.001	3.81407e-83	Tumor	RHOD
	2.42862e-87	3.22314	0.037	0.001	7.23609e-83	Tumor	AC007529.2
	4.00459e-87	2.22933	0.158	0.086	1.19317e-82	Tumor	TRPC1
	4.34605e-87	4.09317	0.044	0.004	1.29491e-82	Tumor	MYO16
	4.46349e-87	3.65476	0.039	0.002	1.3299e-82	Tumor	EYA1
	4.60937e-87	3.3497	0.052	0.008	1.37336e-82	Tumor	FGF12
	6.47829e-87	6.0193	0.039	0.002	1.93021e-82	Tumor	COL1A1
	8.24893e-87	2.23619	0.202	0.128	2.45777e-82	Tumor	PDP1
	9.20825e-87	5.58591	0.035	0	2.7436e-82	Tumor	APCDD1L-DT
	1.70924e-86	4.8246	0.043	0.004	5.09267e-82	Tumor	SLC24A3
	2.09552e-86	5.34227	0.036	0.001	6.24361e-82	Tumor	DMRTA1
	3.40772e-86	4.66576	0.035	0.001	1.01533e-81	Tumor	LHX8
	3.53799e-86	4.23201	0.038	0.002	1.05415e-81	Tumor	TWIST2
	5.28314e-86	3.78158	0.04	0.003	1.57411e-81	Tumor	AL035446.1
	6.7523e-86	2.10077	0.193	0.119	2.01185e-81	Tumor	SHC1
	6.96612e-86	3.37427	0.043	0.004	2.07556e-81	Tumor	CNTNAP3B
	1.22312e-85	2.52845	0.042	0.004	3.64428e-81	Tumor	AC005670.3
	1.3795e-85	2.26461	0.047	0.006	4.11023e-81	Tumor	AC004797.1
	1.45153e-85	2.76925	0.047	0.006	4.32483e-81	Tumor	LINC00963
	1.72384e-85	5.63734	0.035	0.001	5.13619e-81	Tumor	AC019117.2
	1.76774e-85	2.82181	0.117	0.054	5.26699e-81	Tumor	ARMC9
	2.44814e-85	3.15983	0.088	0.032	7.29423e-81	Tumor	PRC1
	3.6335e-85	2.52228	0.119	0.054	1.0826e-80	Tumor	PDE5A
	3.81259e-85	4.05949	0.034	0	1.13596e-80	Tumor	HOXC13-AS
	3.95443e-85	3.1483	0.064	0.016	1.17822e-80	Tumor	ASAP3
	6.99407e-85	4.88149	0.035	0.001	2.08388e-80	Tumor	AC087762.1
	7.03923e-85	3.61159	0.06	0.014	2.09734e-80	Tumor	TROAP
	7.64403e-85	3.27946	0.04	0.003	2.27754e-80	Tumor	AC011632.1
	1.54837e-84	2.29304	0.112	0.049	4.61337e-80	Tumor	CCDC34
	1.58881e-84	4.04293	0.042	0.004	4.73387e-80	Tumor	STK32A
	1.94839e-84	2.34979	0.087	0.031	5.80524e-80	Tumor	SMIM10
	2.20819e-84	2.26879	0.114	0.051	6.57931e-80	Tumor	DOK6
	2.43362e-84	5.60657	0.034	0	7.25098e-80	Tumor	AC018464.1
	2.61007e-84	3.46512	0.062	0.015	7.7767e-80	Tumor	AL589740.1
	2.77551e-84	4.51404	0.039	0.003	8.26963e-80	Tumor	TBX2
	8.77315e-84	2.11706	0.114	0.051	2.61396e-79	Tumor	CEP112
	9.05079e-84	3.94613	0.044	0.005	2.69668e-79	Tumor	TNFRSF19
	1.24906e-83	4.51109	0.034	0.001	3.72157e-79	Tumor	LINC02450
	2.15012e-83	4.67159	0.034	0.001	6.40629e-79	Tumor	RNF182
	3.30243e-83	4.98534	0.034	0	9.8396e-79	Tumor	CHL1-AS2
	3.46466e-83	4.08374	0.052	0.01	1.0323e-78	Tumor	CADM3
	7.17143e-83	3.75031	0.066	0.018	2.13673e-78	Tumor	SCN1A
	9.73714e-83	4.10812	0.065	0.018	2.90118e-78	Tumor	IGFBP3
	1.00402e-82	6.80962	0.034	0.001	2.99148e-78	Tumor	PTPRQ
	1.04078e-82	3.14633	0.052	0.009	3.10102e-78	Tumor	AC005476.2
	1.43933e-82	3.77512	0.037	0.002	4.28849e-78	Tumor	POGLUT3
	3.44969e-82	2.83543	0.078	0.026	1.02783e-77	Tumor	XYLB
	3.5359e-82	3.72427	0.055	0.011	1.05352e-77	Tumor	PLXNA2
	4.2028e-82	2.44169	0.105	0.045	1.25222e-77	Tumor	NUF2
	4.2526e-82	2.7854	0.04	0.004	1.26706e-77	Tumor	AC002463.1
	8.23023e-82	2.10808	0.168	0.097	2.4522e-77	Tumor	BCKDHB
	1.12633e-81	3.26367	0.042	0.004	3.35591e-77	Tumor	SLC1A1
	1.38992e-81	4.78777	0.035	0.001	4.14128e-77	Tumor	VGLL3
	3.43385e-81	2.79229	0.069	0.021	1.02312e-76	Tumor	GINS1
	4.01144e-81	3.56045	0.043	0.005	1.19521e-76	Tumor	SLC16A9
	4.77899e-81	3.71755	0.039	0.003	1.4239e-76	Tumor	ADAMTS3
	5.40201e-81	3.78033	0.04	0.004	1.60953e-76	Tumor	AC024901.1
	6.00789e-81	4.87762	0.043	0.005	1.79005e-76	Tumor	KRT81
	6.96545e-81	3.25204	0.078	0.027	2.07536e-76	Tumor	SOX6
	7.53984e-81	2.36454	0.096	0.039	2.2465e-76	Tumor	KLHL23
	8.15345e-81	3.30371	0.076	0.025	2.42932e-76	Tumor	CTNNA2
	8.28854e-81	2.29179	0.092	0.036	2.46957e-76	Tumor	CEP55
	8.46223e-81	2.33841	0.103	0.044	2.52132e-76	Tumor	MSC-AS1
	9.54001e-81	2.15202	0.044	0.006	2.84245e-76	Tumor	AC006001.2
	1.27352e-80	4.89051	0.043	0.005	3.79446e-76	Tumor	PLPP4
	1.89064e-80	4.25059	0.04	0.004	5.63316e-76	Tumor	SERPINA3
	3.11162e-80	4.12545	0.034	0.001	9.27107e-76	Tumor	CRPPA
	3.18141e-80	2.16131	0.15	0.082	9.47902e-76	Tumor	PUS7
	5.3118e-80	3.41057	0.032	0	1.58265e-75	Tumor	HOTAIR
	6.03278e-80	3.86169	0.054	0.011	1.79747e-75	Tumor	MAMDC2
	8.38611e-80	2.73737	0.058	0.014	2.49864e-75	Tumor	CDCA3
	9.47406e-80	3.26127	0.059	0.014	2.8228e-75	Tumor	MDGA2
	1.4133e-79	3.61593	0.041	0.005	4.21093e-75	Tumor	HSPB8
	1.63211e-79	3.15258	0.039	0.003	4.86287e-75	Tumor	SSC5D
	2.48866e-79	2.30804	0.118	0.056	7.41496e-75	Tumor	P3H4
	2.63083e-79	6.00018	0.031	0	7.83856e-75	Tumor	HOXC9
	1.73638e-78	2.86366	0.083	0.031	5.17355e-74	Tumor	CMC4
	9.03296e-78	3.88598	0.032	0.001	2.69137e-73	Tumor	SNHG26
	9.51573e-78	2.09673	0.122	0.06	2.83521e-73	Tumor	FANCC
	2.26262e-77	4.70345	0.034	0.002	6.74147e-73	Tumor	MEF2C-AS2
	2.9636e-77	4.08232	0.045	0.007	8.83004e-73	Tumor	LHX2
	3.18452e-77	2.82838	0.05	0.01	9.48829e-73	Tumor	BOLA2
	3.70285e-77	2.58124	0.04	0.004	1.10326e-72	Tumor	TPT1-AS1
	4.15467e-77	2.14514	0.105	0.046	1.23789e-72	Tumor	SUCLG2-AS1
	4.28239e-77	3.96811	0.033	0.001	1.27594e-72	Tumor	TRIM52-AS1
	4.90279e-77	3.6031	0.035	0.002	1.46079e-72	Tumor	LINC00174
	5.86518e-77	3.34723	0.119	0.06	1.74753e-72	Tumor	ADGRL3
	6.48286e-77	3.89815	0.032	0.001	1.93157e-72	Tumor	CHRNA9
	7.49412e-77	6.31132	0.031	0	2.23287e-72	Tumor	NPSR1-AS1
	1.18953e-76	4.24002	0.035	0.002	3.54419e-72	Tumor	SYNPO
	1.21435e-76	2.37858	0.068	0.021	3.61815e-72	Tumor	GJC1
	1.30815e-76	3.54841	0.052	0.011	3.89762e-72	Tumor	ELOVL2
	1.37795e-76	3.52068	0.041	0.005	4.10562e-72	Tumor	LUZP2
	2.4736e-76	3.87228	0.042	0.006	7.3701e-72	Tumor	SIX4
	4.84066e-76	4.56526	0.042	0.006	1.44228e-71	Tumor	SHISA9
	7.57483e-76	3.35932	0.033	0.002	2.25692e-71	Tumor	LINC01965
	1.64739e-75	2.6395	0.062	0.018	4.90839e-71	Tumor	STK32B
	2.03312e-75	2.66941	0.062	0.017	6.05767e-71	Tumor	DEPDC1B
	2.14873e-75	4.31206	0.031	0.001	6.40214e-71	Tumor	KCNK2
	2.21493e-75	2.68703	0.038	0.004	6.59938e-71	Tumor	AL118511.1
	2.53673e-75	3.85235	0.034	0.002	7.55818e-71	Tumor	CPXM1
	3.20513e-75	4.01646	0.033	0.001	9.54968e-71	Tumor	AL035446.2
	3.76725e-75	2.78612	0.046	0.008	1.12245e-70	Tumor	KCTD15
	6.40215e-75	3.56728	0.044	0.007	1.90752e-70	Tumor	ANGPTL1
	7.11803e-75	3.35736	0.036	0.003	2.12082e-70	Tumor	TRPC3
	7.37228e-75	2.7643	0.048	0.009	2.19657e-70	Tumor	HIST1H3G
	8.90954e-75	3.75982	0.033	0.002	2.6546e-70	Tumor	ACOX2
	1.21362e-74	2.70278	0.048	0.009	3.61598e-70	Tumor	HIST1H3B
	1.88243e-74	2.08963	0.045	0.007	5.60871e-70	Tumor	ANTKMT
	2.07601e-74	2.23092	0.089	0.036	6.18548e-70	Tumor	CDK1
	2.40185e-74	2.84457	0.035	0.003	7.1563e-70	Tumor	AC023509.6
	3.17836e-74	3.07511	0.034	0.002	9.46991e-70	Tumor	ZMAT4
	5.49162e-74	2.19097	0.167	0.102	1.63623e-69	Tumor	MYO10
	8.81362e-74	4.27141	0.036	0.003	2.62602e-69	Tumor	MEG3
	1.29823e-73	5.24995	0.033	0.002	3.86808e-69	Tumor	AC008415.1
	1.34064e-73	3.35575	0.032	0.001	3.99442e-69	Tumor	EMC1-AS1
	2.957e-73	2.99542	0.032	0.002	8.81038e-69	Tumor	LAMTOR5-AS1
	4.12592e-73	4.26839	0.035	0.003	1.22932e-68	Tumor	AC083837.1
	5.71177e-73	2.33788	0.058	0.016	1.70182e-68	Tumor	CRABP2
	6.38592e-73	2.18045	0.086	0.035	1.90268e-68	Tumor	KIF18A
	6.82851e-73	2.78431	0.074	0.026	2.03455e-68	Tumor	TMEM132A
	7.80918e-73	2.72612	0.077	0.028	2.32674e-68	Tumor	CMBL
	1.20267e-72	2.6286	0.041	0.006	3.58336e-68	Tumor	UPK3BL1
	1.25129e-72	3.61584	0.039	0.005	3.72823e-68	Tumor	FAT3
	1.46966e-72	3.57446	0.032	0.002	4.37885e-68	Tumor	ZNF528-AS1
	1.82057e-72	4.45708	0.03	0.001	5.42439e-68	Tumor	AC089983.1
	2.59031e-72	2.81181	0.048	0.01	7.71782e-68	Tumor	AC092567.1
	2.88988e-72	3.07343	0.06	0.017	8.61041e-68	Tumor	SLC12A8
	3.85877e-72	2.94902	0.044	0.007	1.14972e-67	Tumor	SPRY4
	4.65629e-72	3.25754	0.032	0.002	1.38734e-67	Tumor	AL139317.5
	9.98667e-72	3.83038	0.032	0.002	2.97553e-67	Tumor	C2orf27A
	1.3758e-71	2.04361	0.085	0.034	4.09919e-67	Tumor	ANKRD29
	1.47156e-71	4.67309	0.04	0.006	4.3845e-67	Tumor	U52111.1
	1.56536e-71	3.04449	0.043	0.007	4.66399e-67	Tumor	CFAP69
	2.10747e-71	5.66597	0.032	0.002	6.27922e-67	Tumor	S100A3
	2.69337e-71	4.61469	0.03	0.001	8.0249e-67	Tumor	HLA-F-AS1
	3.04448e-71	2.74108	0.052	0.013	9.07103e-67	Tumor	PDGFRL
	3.53584e-71	4.33357	0.031	0.001	1.0535e-66	Tumor	SUSD4
	3.67202e-71	3.43204	0.05	0.012	1.09408e-66	Tumor	FGD1
	5.41099e-71	2.72316	0.065	0.021	1.61221e-66	Tumor	RCN3
	5.62941e-71	3.54502	0.037	0.004	1.67728e-66	Tumor	CD36
	5.86385e-71	2.51272	0.12	0.062	1.74714e-66	Tumor	CSMD2
	6.83921e-71	3.97939	0.029	0	2.03774e-66	Tumor	LINC00702
	1.13124e-70	2.75544	0.055	0.014	3.37052e-66	Tumor	SCML2
	1.15218e-70	2.3677	0.103	0.048	3.43292e-66	Tumor	MMP2
	1.15877e-70	2.74479	0.07	0.024	3.45255e-66	Tumor	IQSEC2
	1.20562e-70	2.73697	0.085	0.034	3.59214e-66	Tumor	POT1-AS1
	1.31575e-70	2.8609	0.094	0.042	3.92029e-66	Tumor	PTPRO
	1.31931e-70	2.79547	0.059	0.017	3.9309e-66	Tumor	CNKSR2
	1.68436e-70	2.42673	0.132	0.071	5.01854e-66	Tumor	DCBLD1
	2.20897e-70	2.91357	0.075	0.028	6.58162e-66	Tumor	DAB1
	2.36627e-70	5.34206	0.033	0.003	7.0503e-66	Tumor	COL24A1
	2.69513e-70	3.66169	0.03	0.001	8.03013e-66	Tumor	RBMS3-AS3
	3.40908e-70	2.4604	0.034	0.003	1.01573e-65	Tumor	ZNF561-AS1
	3.95778e-70	4.23372	0.035	0.003	1.17922e-65	Tumor	PODNL1
	4.59754e-70	4.0437	0.031	0.001	1.36984e-65	Tumor	DCN
	4.84314e-70	2.97747	0.031	0.002	1.44301e-65	Tumor	AC020915.2
	5.16787e-70	2.72774	0.033	0.002	1.53977e-65	Tumor	AL096803.2
	5.46041e-70	2.88049	0.052	0.013	1.62693e-65	Tumor	BCL2L2-PABPN1
	5.85143e-70	3.33939	0.031	0.002	1.74343e-65	Tumor	AC092944.1
	7.48412e-70	3.69622	0.03	0.001	2.22989e-65	Tumor	AP001442.1
	1.98363e-69	2.2366	0.17	0.107	5.91023e-65	Tumor	POLA1
	2.0883e-69	2.06209	0.197	0.133	6.2221e-65	Tumor	MTHFD1L
	3.73662e-69	2.2708	0.175	0.113	1.11333e-64	Tumor	CYP51A1
	4.0256e-69	3.69006	0.033	0.003	1.19943e-64	Tumor	BRINP3
	7.47522e-69	3.41665	0.031	0.002	2.22724e-64	Tumor	GABPB1-IT1
	8.73504e-69	2.45303	0.047	0.01	2.6026e-64	Tumor	FAM111B
	1.04782e-68	3.29995	0.03	0.001	3.12198e-64	Tumor	VPS13B-DT
	1.6824e-68	4.98811	0.029	0.001	5.01271e-64	Tumor	SHOX2
	2.01644e-68	4.70193	0.028	0.001	6.00799e-64	Tumor	AL137009.1
	2.15085e-68	2.73637	0.048	0.011	6.40846e-64	Tumor	PCDHGA7
	6.31513e-68	3.35986	0.044	0.009	1.88159e-63	Tumor	AC099560.1
	6.91594e-68	4.61745	0.028	0.001	2.0606e-63	Tumor	AL596087.2
	1.99399e-67	5.41772	0.034	0.003	5.9411e-63	Tumor	LINC00578
	3.56747e-67	2.45515	0.08	0.032	1.06293e-62	Tumor	MED12L
	3.95537e-67	2.50211	0.033	0.003	1.1785e-62	Tumor	AC025442.2
	4.35731e-67	2.91055	0.035	0.004	1.29826e-62	Tumor	CTXN1
	6.07682e-67	3.19156	0.032	0.003	1.81059e-62	Tumor	AC023424.3
	1.2142e-66	3.40947	0.033	0.003	3.61772e-62	Tumor	KCNJ15
	1.48036e-66	4.19751	0.028	0.001	4.41073e-62	Tumor	AL365295.1
	1.57331e-66	3.93133	0.037	0.005	4.68768e-62	Tumor	LINC01116
	2.26421e-66	2.33776	0.04	0.007	6.74621e-62	Tumor	LINC00571
	3.58283e-66	2.368	0.122	0.066	1.0675e-61	Tumor	ST3GAL3
	5.08142e-66	3.6065	0.029	0.001	1.51401e-61	Tumor	LRIG2-DT
	7.10403e-66	3.4252	0.033	0.003	2.11665e-61	Tumor	NOL4
	7.50985e-66	2.26309	0.149	0.089	2.23756e-61	Tumor	EFCAB2
	8.22953e-66	2.74019	0.032	0.003	2.45199e-61	Tumor	SLC66A2
	8.97132e-66	4.17457	0.036	0.005	2.673e-61	Tumor	AC008667.1
	9.70183e-66	4.44443	0.034	0.004	2.89066e-61	Tumor	AC114689.3
	1.01323e-65	7.40219	0.026	0	3.01892e-61	Tumor	HOXC8
	1.10325e-65	2.58744	0.038	0.006	3.28712e-61	Tumor	RESF1
	1.27411e-65	4.16099	0.03	0.002	3.79621e-61	Tumor	AC068992.1
	1.94066e-65	3.06101	0.034	0.004	5.78219e-61	Tumor	BCKDHA
	2.28637e-65	3.35543	0.036	0.005	6.81223e-61	Tumor	CACHD1
	2.32815e-65	2.07202	0.063	0.021	6.93671e-61	Tumor	MFSD14A
	2.33711e-65	3.73429	0.036	0.005	6.96341e-61	Tumor	RHPN2
	2.75555e-65	4.03083	0.028	0.001	8.21016e-61	Tumor	DLX1
	3.84283e-65	3.74483	0.031	0.002	1.14497e-60	Tumor	BBOX1-AS1
	4.58195e-65	6.52075	0.026	0	1.36519e-60	Tumor	MTSS2
	9.38513e-65	2.06504	0.058	0.018	2.7963e-60	Tumor	SCGB2B2
	1.04744e-64	3.21141	0.032	0.003	3.12085e-60	Tumor	AC068587.4
	1.08312e-64	2.72367	0.029	0.002	3.22715e-60	Tumor	EEF1AKNMT
	1.0969e-64	3.16749	0.044	0.009	3.26821e-60	Tumor	ACKR3
	1.23651e-64	2.06618	0.061	0.02	3.68419e-60	Tumor	GTSE1
	1.32985e-64	2.22206	0.172	0.112	3.9623e-60	Tumor	SARNP
	1.55273e-64	2.01591	0.055	0.016	4.62636e-60	Tumor	PTGS2
	2.78398e-64	4.39268	0.038	0.006	8.29487e-60	Tumor	KIF20A
	3.54588e-64	3.95082	0.029	0.002	1.05649e-59	Tumor	Z83843.1
	3.62232e-64	2.12623	0.038	0.006	1.07927e-59	Tumor	PCBP1-AS1
	3.87338e-64	2.49407	0.049	0.012	1.15407e-59	Tumor	TBX3
	4.9486e-64	4.95948	0.028	0.001	1.47444e-59	Tumor	CASC8
	6.47255e-64	3.18233	0.031	0.003	1.9285e-59	Tumor	BEGAIN
	1.0851e-63	2.26044	0.035	0.005	3.23307e-59	Tumor	CCN3
	1.27654e-63	2.23185	0.111	0.057	3.80345e-59	Tumor	TMEM67
	2.28229e-63	2.72718	0.032	0.003	6.8001e-59	Tumor	DIPK2A
	3.64459e-63	3.57259	0.047	0.012	1.0859e-58	Tumor	TRPM3
	3.80062e-63	3.78864	0.037	0.006	1.13239e-58	Tumor	BGN
	4.51003e-63	3.27454	0.031	0.003	1.34376e-58	Tumor	LINC00535
	5.36597e-63	3.59193	0.031	0.003	1.59879e-58	Tumor	MIR3681HG
	7.07483e-63	2.45423	0.057	0.018	2.10795e-58	Tumor	MTRNR2L6
	9.9861e-63	2.45861	0.038	0.006	2.97536e-58	Tumor	EIF4EBP3
	1.11629e-62	2.54482	0.102	0.05	3.32597e-58	Tumor	PRAG1
	1.13084e-62	3.36568	0.029	0.002	3.36933e-58	Tumor	PDGFD
	1.23453e-62	2.171	0.095	0.045	3.67827e-58	Tumor	HOTAIRM1
	1.30146e-62	3.82964	0.025	0	3.8777e-58	Tumor	HOXC6
	1.30849e-62	2.14025	0.044	0.01	3.89864e-58	Tumor	KCNIP1
	1.34466e-62	4.19533	0.029	0.002	4.00641e-58	Tumor	AJUBA
	1.46931e-62	3.52273	0.027	0.001	4.37781e-58	Tumor	FOXF1
	1.73775e-62	2.59408	0.055	0.017	5.17761e-58	Tumor	TACC2
	1.9075e-62	2.34697	0.035	0.005	5.68339e-58	Tumor	SEPTIN6
	2.29122e-62	2.62629	0.062	0.022	6.8267e-58	Tumor	RIMS2
	2.40674e-62	2.10027	0.091	0.042	7.17088e-58	Tumor	TMEM220
	2.57881e-62	2.01639	0.087	0.039	7.68355e-58	Tumor	PYCR1
	2.77342e-62	2.50938	0.031	0.003	8.26341e-58	Tumor	SNHG1
	5.19821e-62	2.45006	0.029	0.002	1.54881e-57	Tumor	LINC00973
	5.39482e-62	5.21125	0.028	0.002	1.60739e-57	Tumor	MMP7
	5.55791e-62	2.09979	0.06	0.02	1.65598e-57	Tumor	CDC6
	5.92799e-62	2.58852	0.05	0.014	1.76624e-57	Tumor	PLD5
	8.83264e-62	4.76707	0.025	0	2.63168e-57	Tumor	SLCO1C1
	9.66979e-62	4.19641	0.027	0.001	2.88111e-57	Tumor	LINC00205
	1.20944e-61	4.5707	0.029	0.002	3.60352e-57	Tumor	LINC02246
	1.35725e-61	2.84043	0.039	0.007	4.04392e-57	Tumor	SOX7
	2.69293e-61	7.42697	0.025	0	8.0236e-57	Tumor	MYO16-AS1
	3.19037e-61	3.58662	0.039	0.007	9.50571e-57	Tumor	MMP3
	4.35159e-61	2.60444	0.071	0.028	1.29656e-56	Tumor	NEK10
	5.17614e-61	4.03652	0.025	0.001	1.54223e-56	Tumor	AC007389.1
	8.32228e-61	3.50897	0.039	0.008	2.47962e-56	Tumor	KIF18B
	1.03378e-60	2.45178	0.03	0.003	3.08015e-56	Tumor	AC053527.2
	1.20266e-60	3.44614	0.027	0.002	3.58331e-56	Tumor	AC253572.2
	1.62494e-60	3.69643	0.028	0.002	4.8415e-56	Tumor	AC099066.2
	1.76279e-60	2.09936	0.105	0.054	5.25224e-56	Tumor	CH25H
	1.80914e-60	3.78595	0.036	0.006	5.39033e-56	Tumor	LAMA3
	1.81205e-60	2.05537	0.109	0.057	5.39901e-56	Tumor	NT5DC2
	2.90374e-60	3.56438	0.034	0.005	8.65168e-56	Tumor	PAX6
	3.50501e-60	2.19909	0.105	0.053	1.04432e-55	Tumor	KIF9-AS1
	3.54887e-60	3.24499	0.056	0.018	1.05738e-55	Tumor	EDNRB
	3.7214e-60	2.33776	0.099	0.049	1.10879e-55	Tumor	ZBTB20-AS5
	8.92493e-60	2.12788	0.116	0.062	2.65918e-55	Tumor	DYRK3
	1.12459e-59	2.46545	0.06	0.021	3.35071e-55	Tumor	ARHGEF26
	1.17089e-59	2.54119	0.097	0.048	3.48866e-55	Tumor	CTHRC1
	1.64046e-59	4.1566	0.034	0.005	4.88776e-55	Tumor	LYPD6B
	1.85276e-59	3.58387	0.027	0.001	5.5203e-55	Tumor	AC004917.1
	2.02971e-59	3.88715	0.027	0.002	6.04751e-55	Tumor	SGO1-AS1
	2.61756e-59	3.40192	0.026	0.001	7.79902e-55	Tumor	TSPAN12
	4.75752e-59	4.37344	0.025	0.001	1.4175e-54	Tumor	LINC01128
	5.08629e-59	2.61978	0.063	0.023	1.51546e-54	Tumor	HOXB3
	5.72185e-59	3.95401	0.028	0.002	1.70483e-54	Tumor	ELAVL2
	5.91305e-59	3.19597	0.041	0.009	1.76179e-54	Tumor	AL078459.1
	6.07093e-59	2.41875	0.027	0.002	1.80883e-54	Tumor	ZKSCAN7-AS1
	7.8824e-59	3.35218	0.034	0.005	2.34856e-54	Tumor	MALRD1
	8.50591e-59	2.55868	0.032	0.004	2.53434e-54	Tumor	CD27-AS1
	9.06373e-59	2.05662	0.175	0.118	2.70054e-54	Tumor	NUSAP1
	1.31976e-58	2.42168	0.069	0.027	3.93222e-54	Tumor	CTDSPL
	1.91675e-58	3.93017	0.025	0.001	5.71097e-54	Tumor	DAZL
	2.26823e-58	2.3151	0.03	0.003	6.75819e-54	Tumor	AL162253.2
	2.30237e-58	4.18536	0.025	0.001	6.8599e-54	Tumor	HTR2A
	2.34136e-58	2.34847	0.064	0.024	6.97607e-54	Tumor	SMC5-AS1
	2.47526e-58	8.55579	0.023	0	7.37505e-54	Tumor	LINC02281
	2.64091e-58	3.90967	0.024	0.001	7.8686e-54	Tumor	SLCO2A1
	3.08618e-58	2.56088	0.109	0.058	9.19528e-54	Tumor	HES4
	3.09639e-58	2.87967	0.028	0.002	9.22568e-54	Tumor	DENND11
	3.40347e-58	4.14047	0.029	0.003	1.01406e-53	Tumor	FERMT1
	3.55053e-58	2.66913	0.043	0.01	1.05788e-53	Tumor	LINC01301
	3.56772e-58	4.98841	0.024	0.001	1.063e-53	Tumor	SOCS2-AS1
	4.0187e-58	4.20695	0.028	0.002	1.19737e-53	Tumor	KCNH7
	5.47181e-58	2.58159	0.092	0.044	1.63033e-53	Tumor	FBXL2
	5.56234e-58	3.17688	0.042	0.01	1.6573e-53	Tumor	RAPGEF4
	5.68816e-58	4.86452	0.035	0.006	1.69479e-53	Tumor	CXCL6
	6.01179e-58	2.31871	0.053	0.017	1.79121e-53	Tumor	OBSL1
	7.71531e-58	3.80577	0.027	0.002	2.29878e-53	Tumor	HOXA-AS2
	1.02988e-57	2.33806	0.041	0.009	3.06854e-53	Tumor	NKX3-1
	1.13931e-57	2.59824	0.054	0.017	3.39458e-53	Tumor	KIF15
	1.20629e-57	4.04263	0.038	0.007	3.59415e-53	Tumor	2024-12-01
	1.36478e-57	6.39677	0.024	0	4.06635e-53	Tumor	GACAT2
	1.80778e-57	2.23542	0.082	0.037	5.38628e-53	Tumor	GPR173
	1.92953e-57	5.17067	0.029	0.003	5.74903e-53	Tumor	AP005230.1
	2.52719e-57	4.56493	0.023	0	7.52977e-53	Tumor	ANGPTL5
	2.7177e-57	3.49636	0.038	0.008	8.09737e-53	Tumor	AC016708.1
	3.10569e-57	3.94578	0.025	0.001	9.2534e-53	Tumor	AC091826.2
	3.8216e-57	4.66396	0.023	0	1.13864e-52	Tumor	AC114284.1
	5.24532e-57	3.12325	0.028	0.003	1.56284e-52	Tumor	AC091212.1
	6.37031e-57	3.12713	0.049	0.015	1.89803e-52	Tumor	NXN
	6.67951e-57	2.77861	0.032	0.005	1.99016e-52	Tumor	GAL
	1.97451e-56	2.32894	0.14	0.085	5.88304e-52	Tumor	IL1RAP
	2.5601e-56	3.18595	0.046	0.013	7.62782e-52	Tumor	ST7-AS2
	2.6481e-56	4.47792	0.024	0.001	7.89002e-52	Tumor	RAET1G
	3.31185e-56	3.92459	0.028	0.003	9.86765e-52	Tumor	MEG8
	5.14817e-56	6.40716	0.024	0.001	1.5339e-51	Tumor	LNCSRLR
	5.47864e-56	2.18813	0.116	0.066	1.63236e-51	Tumor	LHFPL3
	5.64708e-56	3.13959	0.072	0.031	1.68255e-51	Tumor	ADARB2
	5.71669e-56	4.5829	0.026	0.002	1.70329e-51	Tumor	SLC2A14
	6.77e-56	8.21784	0.022	0	2.01712e-51	Tumor	PLPPR4
	7.90794e-56	3.972	0.029	0.003	2.35617e-51	Tumor	PIMREG
	8.8334e-56	2.88384	0.045	0.012	2.63191e-51	Tumor	ZCWPW2
	1.28347e-55	4.88166	0.024	0.001	3.82409e-51	Tumor	AC016747.1
	1.33984e-55	3.24622	0.026	0.002	3.99205e-51	Tumor	SHOC1
	1.41528e-55	5.68541	0.024	0.001	4.21683e-51	Tumor	TSLP
	1.58892e-55	4.06174	0.023	0.001	4.7342e-51	Tumor	AC011586.2
	1.85233e-55	2.28046	0.154	0.098	5.51902e-51	Tumor	TTC39B
	2.67061e-55	2.61409	0.046	0.013	7.95709e-51	Tumor	SPRY4-AS1
	2.6772e-55	3.21528	0.032	0.005	7.97671e-51	Tumor	GPR156
	3.28192e-55	3.60118	0.037	0.007	9.77849e-51	Tumor	SDC1
	3.28964e-55	3.76248	0.023	0.001	9.80147e-51	Tumor	PTPRG-AS1
	3.47267e-55	2.09665	0.083	0.038	1.03468e-50	Tumor	BRIP1
	6.06078e-55	2.38499	0.074	0.032	1.80581e-50	Tumor	DSCC1
	6.10637e-55	3.74815	0.034	0.006	1.81939e-50	Tumor	ARL9
	6.33443e-55	4.83629	0.023	0.001	1.88734e-50	Tumor	AC113386.1
	7.48187e-55	2.26802	0.053	0.018	2.22922e-50	Tumor	TOM1L1
	8.2679e-55	3.14117	0.032	0.005	2.46342e-50	Tumor	CRMP1
	8.43856e-55	2.9962	0.036	0.007	2.51427e-50	Tumor	AL133346.1
	8.69042e-55	3.06357	0.026	0.002	2.58931e-50	Tumor	AC091607.2
	1.03537e-54	3.14495	0.029	0.003	3.08487e-50	Tumor	NPTX1
	1.32532e-54	2.95631	0.025	0.001	3.94878e-50	Tumor	MRPL20-AS1
	1.35796e-54	4.56211	0.022	0	4.04605e-50	Tumor	DLX2
	1.37262e-54	3.52792	0.023	0.001	4.08972e-50	Tumor	AL589935.1
	1.62879e-54	3.53978	0.026	0.002	4.85297e-50	Tumor	VCAN-AS1
	4.58945e-54	2.45435	0.085	0.04	1.36743e-49	Tumor	PDIA5
	4.8369e-54	3.11716	0.055	0.019	1.44115e-49	Tumor	OLFM2
	4.91891e-54	2.19546	0.101	0.053	1.46559e-49	Tumor	TTC8
	5.11462e-54	3.02822	0.03	0.004	1.5239e-49	Tumor	HAS2-AS1
	6.52183e-54	3.23337	0.033	0.006	1.94318e-49	Tumor	AP002518.2
	9.55761e-54	3.6661	0.022	0	2.84769e-49	Tumor	AC110058.1
	1.04698e-53	2.56411	0.041	0.011	3.11947e-49	Tumor	A4GALT
	1.22889e-53	3.01312	0.026	0.002	3.66148e-49	Tumor	AC092821.3
	1.30091e-53	3.40837	0.024	0.002	3.87606e-49	Tumor	AC008969.1
	1.70412e-53	3.22246	0.031	0.005	5.07742e-49	Tumor	RAVER2
	1.71413e-53	2.73212	0.048	0.015	5.10726e-49	Tumor	PRKG1
	3.07495e-53	2.79989	0.041	0.011	9.16181e-49	Tumor	CCDC173
	3.17116e-53	4.07904	0.024	0.001	9.44846e-49	Tumor	FBN2
	4.008e-53	6.10012	0.024	0.001	1.19418e-48	Tumor	PI3
	7.68675e-53	2.73831	0.054	0.019	2.29027e-48	Tumor	FILIP1
	9.30106e-53	2.41788	0.191	0.14	2.77125e-48	Tumor	RGS3
	9.816e-53	2.69018	0.035	0.007	2.92468e-48	Tumor	ADCY1
	1.04891e-52	2.35878	0.049	0.016	3.12522e-48	Tumor	DTL
	1.07182e-52	4.03077	0.022	0.001	3.1935e-48	Tumor	MXRA5
	1.08324e-52	2.77838	0.05	0.016	3.22751e-48	Tumor	ELN
	1.17583e-52	3.97405	0.023	0.001	3.50337e-48	Tumor	KCNMB2
	1.29796e-52	3.94339	0.028	0.003	3.86727e-48	Tumor	CFAP300
	1.35631e-52	3.10552	0.037	0.008	4.04113e-48	Tumor	AL627171.2
	1.58876e-52	4.62561	0.023	0.001	4.73372e-48	Tumor	HOXA5
	1.60279e-52	3.272	0.025	0.002	4.77551e-48	Tumor	RASSF9
	1.73922e-52	2.7697	0.032	0.006	5.18202e-48	Tumor	AC027288.3
	4.22569e-52	4.71086	0.021	0	1.25904e-47	Tumor	LINC01444
	4.44102e-52	2.11208	0.078	0.036	1.3232e-47	Tumor	BUB1B
	4.63652e-52	3.37059	0.041	0.011	1.38145e-47	Tumor	C9orf24
	4.9011e-52	2.16332	0.043	0.012	1.46028e-47	Tumor	AC002480.2
	5.50494e-52	2.70722	0.03	0.005	1.6402e-47	Tumor	SCN2A
	5.77098e-52	3.41592	0.035	0.007	1.71946e-47	Tumor	ELMOD1
	6.12323e-52	3.05889	0.043	0.012	1.82442e-47	Tumor	COL27A1
	7.81445e-52	4.07809	0	0.01	2.32831e-47	Tumor	ILDR1
	9.23541e-52	2.55566	0.041	0.011	2.75169e-47	Tumor	PIK3R2
	1.04923e-51	4.04808	0.043	0.012	3.12617e-47	Tumor	SORCS1
	1.1599e-51	4.3127	0.022	0.001	3.45592e-47	Tumor	AC008443.1
	1.28988e-51	4.62523	0.026	0.002	3.8432e-47	Tumor	CCDC85A
	1.45013e-51	5.65056	0.021	0	4.32067e-47	Tumor	BBOX1
	1.80897e-51	3.34235	0.023	0.001	5.38983e-47	Tumor	TEX15
	2.09206e-51	3.65764	0.046	0.014	6.2333e-47	Tumor	CSMD1
	2.48969e-51	4.45775	0.021	0	7.41803e-47	Tumor	PLPPR5
	2.61569e-51	3.74748	0.023	0.002	7.79344e-47	Tumor	ATPSCKMT
	2.67733e-51	2.23619	0.069	0.03	7.97712e-47	Tumor	CENPA
	3.41182e-51	2.02352	0.145	0.093	1.01655e-46	Tumor	FKBP9
	3.50001e-51	2.01675	0.125	0.074	1.04283e-46	Tumor	WARS2
	4.57074e-51	4.07666	0.022	0.001	1.36185e-46	Tumor	SNHG11
	5.79993e-51	3.27009	0.034	0.007	1.72809e-46	Tumor	SNCAIP
	6.67782e-51	2.69375	0.035	0.008	1.98966e-46	Tumor	F12
	1.1741e-50	2.07354	0.119	0.07	3.49824e-46	Tumor	IGFBP4
	1.20714e-50	3.16593	0.037	0.009	3.59668e-46	Tumor	COL7A1
	1.38021e-50	2.44518	0.067	0.029	4.11233e-46	Tumor	CENPS
	1.42186e-50	2.23751	0.061	0.024	4.23644e-46	Tumor	VAV2
	1.77986e-50	2.05009	0.068	0.029	5.30311e-46	Tumor	PNMA2
	1.83768e-50	2.13168	0.063	0.026	5.47536e-46	Tumor	FOXM1
	3.8622e-50	3.76823	0.022	0.001	1.15074e-45	Tumor	AL021155.5
	5.04475e-50	2.29047	0.07	0.031	1.50308e-45	Tumor	LINC01572
	5.28582e-50	3.85358	0.022	0.001	1.57491e-45	Tumor	MAOB
	5.33875e-50	2.98403	0.024	0.002	1.59068e-45	Tumor	CHROMR
	8.16933e-50	4.0055	0.026	0.003	2.43405e-45	Tumor	KIAA1549L
	1.15887e-49	2.51779	0.051	0.018	3.45285e-45	Tumor	CENPI
	1.41595e-49	2.26626	0.062	0.025	4.21882e-45	Tumor	MCPH1-AS1
	1.47726e-49	3.88826	0.021	0.001	4.4015e-45	Tumor	AC012291.3
	2.00226e-49	3.39106	0.04	0.011	5.96573e-45	Tumor	LRRN1
	2.11424e-49	3.95326	0.023	0.002	6.29938e-45	Tumor	LINC01090
	2.58832e-49	2.69083	0.075	0.035	7.7119e-45	Tumor	MARK1
	2.6046e-49	3.12555	0.032	0.007	7.7604e-45	Tumor	AC069228.1
	2.85403e-49	2.89811	0.024	0.002	8.50357e-45	Tumor	TYRP1
	3.05064e-49	3.579	0.021	0.001	9.08937e-45	Tumor	AC010198.2
	3.37998e-49	3.23002	0.027	0.003	1.00707e-44	Tumor	SPAG17
	3.51508e-49	2.31266	0.027	0.003	1.04732e-44	Tumor	EIF1B-AS1
	3.53487e-49	3.35181	0.03	0.005	1.05321e-44	Tumor	AC027698.1
	3.88345e-49	3.44435	0.03	0.005	1.15707e-44	Tumor	ZNF503-AS2
	4.54083e-49	4.53539	0.023	0.002	1.35294e-44	Tumor	DIO2-AS1
	4.77942e-49	3.30639	0.036	0.008	1.42403e-44	Tumor	KIAA1549
	6.34391e-49	2.42078	0.024	0.002	1.89017e-44	Tumor	TTC28-AS1
	7.57446e-49	3.46656	0.029	0.005	2.25681e-44	Tumor	USP2-AS1
	7.78705e-49	2.71394	0.043	0.013	2.32015e-44	Tumor	TFAP2C
	1.19081e-48	3.53826	0.025	0.003	3.54802e-44	Tumor	SH3GL2
	1.28454e-48	2.66034	0.024	0.002	3.8273e-44	Tumor	AL109824.1
	1.29564e-48	5.4011	0.021	0.001	3.86036e-44	Tumor	GABRQ
	1.31116e-48	3.43398	0.033	0.007	3.90659e-44	Tumor	MEF2C-AS1
	1.52177e-48	3.41413	0.036	0.009	4.53412e-44	Tumor	AC100800.1
	1.69311e-48	2.4564	0.037	0.009	5.04462e-44	Tumor	AL512422.1
	1.93971e-48	2.62774	0.064	0.027	5.77937e-44	Tumor	RWDD3
	2.02104e-48	3.23169	0.021	0.001	6.0217e-44	Tumor	AC009501.3
	2.02926e-48	2.96453	0.032	0.007	6.04617e-44	Tumor	FOXD3-AS1
	2.23636e-48	2.86786	0.031	0.006	6.66322e-44	Tumor	GHR
	3.37353e-48	3.75123	0.027	0.004	1.00514e-43	Tumor	MLPH
	4.15294e-48	3.95975	0.024	0.002	1.23737e-43	Tumor	LRFN5
	4.19439e-48	7.3678	0.019	0	1.24972e-43	Tumor	JPH2
	4.48825e-48	3.38623	0.02	0.001	1.33727e-43	Tumor	CHRDL1
	5.25676e-48	3.45068	0.027	0.004	1.56625e-43	Tumor	HECW1
	6.08462e-48	3.41404	0.034	0.008	1.81291e-43	Tumor	RHOJ
	6.98151e-48	4.35047	0.028	0.004	2.08014e-43	Tumor	LRGUK
	7.90488e-48	3.87298	0.022	0.002	2.35526e-43	Tumor	RGS22
	8.16048e-48	2.18222	0.039	0.011	2.43141e-43	Tumor	KCNB1
	8.60869e-48	4.75816	0.02	0.001	2.56496e-43	Tumor	ZIC2
	1.28673e-47	4.65712	0.021	0.001	3.83382e-43	Tumor	BX664615.2
	1.30854e-47	4.99947	0.021	0.001	3.8988e-43	Tumor	LINC01409
	1.65713e-47	3.86795	0.021	0.001	4.93742e-43	Tumor	LZTS1-AS1
	2.0633e-47	2.1211	0.065	0.028	6.14761e-43	Tumor	TSPAN13
	2.41424e-47	4.57137	0.019	0	7.19322e-43	Tumor	AC244033.2
	3.11966e-47	4.9459	0.019	0	9.29501e-43	Tumor	ZNF790-AS1
	3.885e-47	5.14575	0.019	0	1.15754e-42	Tumor	C3orf35
	4.24036e-47	4.01426	0.031	0.006	1.26341e-42	Tumor	DGKB
	4.50151e-47	4.07338	0.024	0.003	1.34123e-42	Tumor	FBLN2
	4.51662e-47	8.42165	0.019	0	1.34573e-42	Tumor	NKX2-5
	4.71828e-47	3.18904	0.03	0.006	1.40581e-42	Tumor	WFDC3
	5.07676e-47	2.36842	0.071	0.033	1.51262e-42	Tumor	WNT5B
	5.24987e-47	2.15995	0.024	0.003	1.5642e-42	Tumor	AC025171.1
	7.53077e-47	2.36517	0.066	0.029	2.24379e-42	Tumor	TEX9
	7.95102e-47	3.9659	0.019	0	2.36901e-42	Tumor	AC011369.1
	8.02816e-47	4.96032	0.02	0.001	2.39199e-42	Tumor	GRIK3
	9.53608e-47	7.54578	0.018	0	2.84128e-42	Tumor	HOXD-AS2
	1.29445e-46	2.33528	0.059	0.024	3.8568e-42	Tumor	RORB
	1.33975e-46	3.92564	0.019	0.001	3.99179e-42	Tumor	AC243964.3
	2.50926e-46	3.49264	0.019	0.001	7.47633e-42	Tumor	LINC02056
	3.43498e-46	3.13879	0.02	0.001	1.02345e-41	Tumor	RERGL
	3.88806e-46	3.7594	0.02	0.001	1.15845e-41	Tumor	LINC00603
	4.06185e-46	2.55969	0.025	0.003	1.21023e-41	Tumor	AL050403.2
	5.82409e-46	2.43864	0.041	0.012	1.73529e-41	Tumor	MIR2052HG
	6.43706e-46	2.43714	0.027	0.004	1.91792e-41	Tumor	CMTM1
	7.0833e-46	3.12999	0.033	0.007	2.11047e-41	Tumor	CDC25C
	7.74023e-46	4.07174	0.025	0.003	2.3062e-41	Tumor	AC099850.2
	7.89444e-46	4.73035	0.021	0.002	2.35215e-41	Tumor	KCNQ2
	8.3936e-46	2.31131	0.045	0.015	2.50087e-41	Tumor	POLQ
	1.00128e-45	4.38029	0.026	0.004	2.98331e-41	Tumor	GRIN2B
	1.14014e-45	2.507	0.053	0.021	3.39706e-41	Tumor	GPR161
	1.22988e-45	2.26961	0.043	0.014	3.66444e-41	Tumor	SKA3
	1.28634e-45	2.21692	0.069	0.031	3.83264e-41	Tumor	ANKRD35
	1.35042e-45	4.1711	0.019	0.001	4.02359e-41	Tumor	GYG2
	1.37185e-45	3.79364	0.02	0.001	4.08742e-41	Tumor	LINC02398
	1.87504e-45	3.82771	0.021	0.002	5.58668e-41	Tumor	ARSE
	2.05248e-45	2.60435	0.051	0.02	6.11537e-41	Tumor	KIAA1211
	2.30704e-45	4.37116	0.019	0.001	6.87383e-41	Tumor	NOG
	2.34726e-45	3.20275	0.027	0.004	6.99367e-41	Tumor	GPR39
	2.76546e-45	5.2343	0.019	0.001	8.23968e-41	Tumor	BNC2-AS1
	3.78737e-45	3.33304	0.022	0.002	1.12845e-40	Tumor	AC087854.1
	4.18889e-45	3.24567	0.024	0.003	1.24808e-40	Tumor	SPEG
	4.28913e-45	2.63654	0.041	0.013	1.27795e-40	Tumor	FAM83D
	4.32838e-45	2.68237	0.021	0.002	1.28964e-40	Tumor	AP000873.2
	6.20087e-45	2.35365	0.046	0.016	1.84755e-40	Tumor	SPC24
	6.33925e-45	4.0399	0.018	0	1.88878e-40	Tumor	AC004556.3
	8.08708e-45	3.28219	0.02	0.001	2.40954e-40	Tumor	NR2F2
	8.54249e-45	2.69088	0.03	0.006	2.54524e-40	Tumor	AC074183.1
	1.03704e-44	3.21066	0.019	0.001	3.08985e-40	Tumor	SNHG31
	1.25364e-44	2.29497	0.038	0.011	3.73522e-40	Tumor	TSKU
	1.32381e-44	2.58294	0.061	0.027	3.94429e-40	Tumor	BCL2L14
	1.39969e-44	2.46002	0.044	0.015	4.17039e-40	Tumor	ERCC6L
	2.62844e-44	3.60438	0.02	0.001	7.83143e-40	Tumor	AC083855.2
	2.68837e-44	5.13739	0.018	0	8.01e-40	Tumor	SP8
	2.78804e-44	3.08013	0.039	0.012	8.30697e-40	Tumor	AL590617.2
	3.47496e-44	3.34866	0.02	0.001	1.03536e-39	Tumor	AC092957.1
	3.56022e-44	3.43883	0.036	0.01	1.06077e-39	Tumor	SCN3A
	3.61113e-44	2.99715	0.022	0.002	1.07594e-39	Tumor	AC018730.1
	3.86175e-44	2.77431	0.036	0.01	1.15061e-39	Tumor	MIR503HG
	4.05033e-44	4.84621	0.017	0	1.2068e-39	Tumor	HOXC11
	4.40207e-44	2.46625	0.045	0.016	1.3116e-39	Tumor	WBP1
	6.13802e-44	2.78688	0.033	0.008	1.82882e-39	Tumor	FGF11
	6.98554e-44	2.4574	0.027	0.005	2.08134e-39	Tumor	PLSCR3
	7.0016e-44	4.71657	0.018	0	2.08613e-39	Tumor	AC064875.1
	9.35409e-44	4.13141	0.019	0.001	2.78705e-39	Tumor	AL596330.2
	9.56653e-44	3.57822	0.02	0.001	2.85035e-39	Tumor	MSTN
	1.48219e-43	3.68209	0.032	0.008	4.41618e-39	Tumor	ATP1B2
	1.52487e-43	3.17149	0.021	0.002	4.54336e-39	Tumor	SLC66A1
	1.72635e-43	2.18766	0.049	0.018	5.14366e-39	Tumor	C9orf147
	2.12951e-43	7.65514	0.017	0	6.34488e-39	Tumor	AC105999.2
	2.27911e-43	2.16511	0.048	0.018	6.79061e-39	Tumor	ABHD16A
	2.44762e-43	2.23146	0.021	0.002	7.29267e-39	Tumor	LINC02693
	2.50446e-43	2.94478	0.031	0.007	7.46204e-39	Tumor	ARHGEF18
	2.91557e-43	2.40503	0.058	0.025	8.68695e-39	Tumor	MND1
	3.41316e-43	2.39761	0.021	0.002	1.01695e-38	Tumor	MIR3936HG
	5.62398e-43	4.67098	0.021	0.002	1.67566e-38	Tumor	LANCL3
	6.39271e-43	3.69704	0.018	0	1.90471e-38	Tumor	STEAP2-AS1
	6.69099e-43	2.85424	0.074	0.038	1.99358e-38	Tumor	DPP6
	8.95687e-43	2.96253	0.019	0.001	2.6687e-38	Tumor	AC115837.2
	9.2303e-43	3.64204	0.018	0.001	2.75017e-38	Tumor	CA8
	9.60092e-43	5.20745	0.023	0.003	2.86059e-38	Tumor	TMEM132D
	1.00193e-42	2.22974	0.02	0.002	2.98525e-38	Tumor	AP002495.1
	2.04806e-42	4.39299	0.04	0.013	6.10221e-38	Tumor	CRYGS
	2.06918e-42	5.5818	0.021	0.002	6.16513e-38	Tumor	SMO
	2.42035e-42	2.10634	0.15	0.104	7.21145e-38	Tumor	NBEA
	2.58325e-42	2.91931	0.036	0.011	7.69679e-38	Tumor	REEP1
	2.63068e-42	3.10726	0.02	0.002	7.83811e-38	Tumor	MYCBP2-AS1
	2.70172e-42	3.4894	0.032	0.008	8.04977e-38	Tumor	SPDYE2
	2.7197e-42	3.55443	0.026	0.004	8.10335e-38	Tumor	SIX5
	3.05139e-42	5.40979	0.018	0.001	9.09163e-38	Tumor	CDH10
	3.45591e-42	3.28461	0.026	0.005	1.02969e-37	Tumor	TMC1
	4.1129e-42	2.5813	0.068	0.033	1.22544e-37	Tumor	JADE3
	4.70217e-42	2.85493	0.038	0.012	1.40101e-37	Tumor	RPS6KA6
	4.82484e-42	3.6463	0.032	0.008	1.43756e-37	Tumor	RYR3
	7.8431e-42	2.149	0.064	0.03	2.33685e-37	Tumor	GPR137C
	7.91501e-42	2.64066	0.026	0.004	2.35828e-37	Tumor	MTUS2
	8.14317e-42	3.66216	0.024	0.004	2.42626e-37	Tumor	AC009107.2
	8.44307e-42	3.14894	0.029	0.006	2.51561e-37	Tumor	ZSCAN23
	8.53287e-42	4.29524	0.017	0	2.54237e-37	Tumor	HOXA2
	8.58963e-42	3.54955	0.017	0	2.55928e-37	Tumor	AL353780.1
	8.98174e-42	3.48787	0.023	0.003	2.67611e-37	Tumor	MINDY4
	1.19159e-41	2.88165	0.019	0.001	3.55034e-37	Tumor	MEAK7
	1.19253e-41	2.24465	0.053	0.022	3.55315e-37	Tumor	MRPL38
	1.24744e-41	6.44857	0.017	0.001	3.71673e-37	Tumor	AC044810.3
	1.29379e-41	3.95869	0.028	0.006	3.85485e-37	Tumor	MAPK12
	1.40579e-41	2.00214	0.078	0.041	4.18856e-37	Tumor	KDELR3
	1.61565e-41	2.09128	0.132	0.088	4.81382e-37	Tumor	C17orf49
	2.5019e-41	2.24995	0.04	0.013	7.45442e-37	Tumor	C9orf116
	2.94324e-41	3.783	0.017	0.001	8.76937e-37	Tumor	AC022325.2
	3.47554e-41	3.44612	0.018	0.001	1.03554e-36	Tumor	AC096537.1
	3.7143e-41	3.16377	0.019	0.001	1.10668e-36	Tumor	AL353138.1
	4.13931e-41	5.44107	0.021	0.002	1.23331e-36	Tumor	STXBP5L
	4.33982e-41	3.00325	0.018	0.001	1.29305e-36	Tumor	AC090945.1
	4.43315e-41	4.36691	0.023	0.003	1.32086e-36	Tumor	EFHC2
	8.23496e-41	4.59665	0.021	0.002	2.45361e-36	Tumor	ANKFN1
	9.04592e-41	2.72442	0.032	0.009	2.69523e-36	Tumor	RSPO3
	9.49019e-41	4.72063	0.016	0	2.8276e-36	Tumor	OSR2
	1.1983e-40	2.39097	0.021	0.002	3.57033e-36	Tumor	LINC02762
	1.31157e-40	3.1016	0.033	0.009	3.90782e-36	Tumor	AC005225.2
	1.6224e-40	2.90399	0.035	0.011	4.83395e-36	Tumor	DDIT4L
	2.01311e-40	2.30664	0.058	0.026	5.99807e-36	Tumor	LRRTM4
	2.19824e-40	5.88904	0.019	0.002	6.54967e-36	Tumor	CSPG4
	2.3735e-40	3.37234	0.027	0.005	7.07184e-36	Tumor	MAP3K20-AS1
	2.46101e-40	2.64795	0.019	0.001	7.33259e-36	Tumor	AC018521.5
	2.51012e-40	7.46621	0.019	0.002	7.4789e-36	Tumor	MMP13
	2.57794e-40	3.42837	0.019	0.001	7.68098e-36	Tumor	AC106818.2
	3.07897e-40	2.4282	0.036	0.011	9.17378e-36	Tumor	KIAA1522
	3.12445e-40	6.28237	0.016	0	9.30929e-36	Tumor	AFP
	3.8391e-40	7.12132	0.017	0	1.14386e-35	Tumor	ONECUT1
	3.90962e-40	3.03489	0.018	0.001	1.16487e-35	Tumor	RAD51-AS1
	4.18185e-40	3.62543	0.017	0	1.24598e-35	Tumor	KIF26B-AS1
	5.40018e-40	2.84257	0.068	0.034	1.60898e-35	Tumor	MAP2
	5.54523e-40	5.73632	0.019	0.002	1.6522e-35	Tumor	POSTN
	5.96292e-40	3.04807	0.033	0.009	1.77665e-35	Tumor	XKR4
	5.9687e-40	3.19258	0.018	0.001	1.77837e-35	Tumor	NBR2
	6.64941e-40	2.07323	0.053	0.022	1.98119e-35	Tumor	ST8SIA1
	7.42468e-40	4.19176	0.017	0.001	2.21218e-35	Tumor	AC099792.1
	7.47966e-40	3.99714	0.019	0.002	2.22856e-35	Tumor	TLL1
	8.06836e-40	2.69243	0.032	0.008	2.40397e-35	Tumor	RAB3B
	1.04013e-39	5.99554	0.017	0.001	3.09907e-35	Tumor	CYP24A1
	1.04629e-39	5.15432	0.016	0	3.11742e-35	Tumor	AC004160.1
	1.33946e-39	2.64814	0.042	0.015	3.99093e-35	Tumor	ARHGAP20
	1.34442e-39	4.61849	0.016	0	4.0057e-35	Tumor	PLAAT1
	1.35028e-39	2.47206	0.026	0.005	4.02317e-35	Tumor	NPW
	1.62601e-39	2.96528	0.026	0.005	4.84469e-35	Tumor	GNA14
	1.79462e-39	2.34917	0.02	0.002	5.34707e-35	Tumor	LINC00339
	2.02865e-39	2.20852	0.039	0.013	6.04437e-35	Tumor	EEF1A2
	2.13933e-39	3.95646	0.024	0.004	6.37414e-35	Tumor	RFX4
	2.38201e-39	4.0633	0.02	0.002	7.0972e-35	Tumor	HRASLS
	2.83303e-39	3.40753	0.029	0.007	8.44102e-35	Tumor	EVC
	3.74067e-39	2.62575	0.02	0.002	1.11453e-34	Tumor	INSYN2A
	5.40997e-39	4.43446	0.016	0.001	1.6119e-34	Tumor	TMEM35A
	6.11037e-39	2.96512	0.019	0.002	1.82059e-34	Tumor	2024-03-02
	6.22972e-39	3.52912	0.024	0.004	1.85614e-34	Tumor	AC026894.1
	6.55323e-39	3.52338	0.019	0.002	1.95254e-34	Tumor	AC012146.1
	6.82206e-39	3.79614	0.017	0.001	2.03263e-34	Tumor	ONECUT2
	7.17739e-39	3.53958	0.02	0.002	2.1385e-34	Tumor	HRCT1
	8.40795e-39	3.88553	0.016	0.001	2.50515e-34	Tumor	ADRA1D
	8.43952e-39	3.54796	0.019	0.002	2.51455e-34	Tumor	BMP4
	8.83444e-39	2.63249	0.042	0.015	2.63222e-34	Tumor	SLC44A3
	8.87288e-39	3.44764	0.018	0.001	2.64368e-34	Tumor	PRKY
	9.2909e-39	3.14255	0.025	0.005	2.76822e-34	Tumor	AC003006.1
	9.65389e-39	3.18683	0.016	0.001	2.87638e-34	Tumor	AL078600.1
	9.90618e-39	3.08302	0.026	0.005	2.95155e-34	Tumor	PCDH15
	1.58445e-38	2.21703	0.055	0.025	4.72087e-34	Tumor	SNED1
	1.71218e-38	4.08709	0.018	0.001	5.10143e-34	Tumor	AC016745.1
	2.04639e-38	3.72741	0.03	0.008	6.09722e-34	Tumor	CACNA2D3
	2.12991e-38	3.39664	0.018	0.001	6.34607e-34	Tumor	SOX5-AS1
	2.29128e-38	3.91936	0.022	0.003	6.82686e-34	Tumor	AC073569.2
	2.685e-38	2.58168	0.019	0.002	7.99994e-34	Tumor	STON1-GTF2A1L
	2.81501e-38	3.92728	0.017	0.001	8.38732e-34	Tumor	LTO1
	2.95673e-38	2.21856	0.1	0.061	8.80959e-34	Tumor	DRAXIN
	5.09198e-38	4.08841	0.016	0.001	1.51715e-33	Tumor	ERVK13-1
	5.60064e-38	2.28377	0.022	0.003	1.66871e-33	Tumor	ZNF295-AS1
	5.9057e-38	2.41928	0.018	0.001	1.7596e-33	Tumor	TAFA2
	6.73755e-38	3.81913	0.018	0.002	2.00745e-33	Tumor	ADAMTS19
	9.7899e-38	4.63531	0.016	0.001	2.9169e-33	Tumor	SLC4A3
	1.11868e-37	3.19904	0.03	0.008	3.3331e-33	Tumor	ANO5
	1.13163e-37	3.88485	0.017	0.001	3.37169e-33	Tumor	RANBP3L
	1.14428e-37	4.18052	0.016	0.001	3.40937e-33	Tumor	CAVIN2
	1.36324e-37	2.73664	0.042	0.015	4.06177e-33	Tumor	SYTL4
	1.50283e-37	2.93884	0.018	0.001	4.47767e-33	Tumor	AL591043.2
	1.63737e-37	2.30705	0.061	0.029	4.87854e-33	Tumor	MT1M
	1.70867e-37	3.13341	0.023	0.004	5.09098e-33	Tumor	HNF4G
	1.77241e-37	2.01356	0.077	0.042	5.28089e-33	Tumor	PARPBP
	1.86434e-37	2.36599	0.034	0.01	5.55481e-33	Tumor	C16orf74
	2.12232e-37	2.38287	0.034	0.01	6.32345e-33	Tumor	AC007364.1
	2.31677e-37	4.25526	0.017	0.001	6.90283e-33	Tumor	MKLN1-AS
	2.34594e-37	4.56032	0.016	0.001	6.98971e-33	Tumor	AC010457.1
	3.06508e-37	2.2559	0.041	0.015	9.1324e-33	Tumor	SOX11
	3.16577e-37	2.98076	0.03	0.008	9.43241e-33	Tumor	KCNMB2-AS1
	3.48381e-37	2.94554	0.027	0.007	1.038e-32	Tumor	RNF175
	4.59437e-37	3.26725	0.015	0	1.36889e-32	Tumor	LINC02755
	4.76161e-37	4.25851	0.017	0.001	1.41872e-32	Tumor	AC104162.2
	5.30606e-37	3.3643	0.024	0.005	1.58094e-32	Tumor	TCF4-AS1
	6.99907e-37	3.28593	0.025	0.005	2.08537e-32	Tumor	AC006213.3
	7.28782e-37	2.95422	0.034	0.011	2.17141e-32	Tumor	DBNDD1
	7.30231e-37	3.82948	0.015	0	2.17572e-32	Tumor	AL365214.2
	1.28313e-36	2.92589	0.029	0.008	3.82309e-32	Tumor	AC246817.1
	1.39571e-36	4.19034	0.014	0	4.15851e-32	Tumor	PITX2
	1.78239e-36	8.15626	0.014	0	5.31063e-32	Tumor	AL136456.1
	1.80736e-36	3.14854	0.017	0.001	5.38501e-32	Tumor	AP000779.1
	1.87418e-36	4.5112	0.015	0	5.58411e-32	Tumor	AL450992.3
	2.33727e-36	4.91766	0.014	0	6.96388e-32	Tumor	LINC02595
	2.36605e-36	4.54232	0.022	0.004	7.04965e-32	Tumor	DPP10
	2.39088e-36	2.3736	0.055	0.025	7.12362e-32	Tumor	P4HA3
	2.53528e-36	3.38013	0.023	0.004	7.55387e-32	Tumor	Z97200.1
	2.67113e-36	3.02513	0.028	0.007	7.95864e-32	Tumor	TIMP4
	2.6993e-36	3.97619	0.024	0.005	8.04255e-32	Tumor	IGSF3
	3.22342e-36	3.18905	0.023	0.004	9.60418e-32	Tumor	KAZALD1
	3.33339e-36	2.67213	0.029	0.008	9.93184e-32	Tumor	AC243964.2
	3.62443e-36	3.92261	0.022	0.004	1.0799e-31	Tumor	F13A1
	3.73271e-36	5.13066	0.015	0	1.11216e-31	Tumor	GPR87
	4.53712e-36	8.96812	0.014	0	1.35183e-31	Tumor	LINC02360
	4.95225e-36	3.71974	0.016	0.001	1.47552e-31	Tumor	BCO1
	6.27501e-36	3.18977	0.015	0.001	1.86964e-31	Tumor	AC004470.1
	7.00035e-36	2.92337	0.026	0.006	2.08575e-31	Tumor	EPHB1
	7.83366e-36	3.40042	0.015	0.001	2.33404e-31	Tumor	AC026356.2
	8.1485e-36	3.50836	0.022	0.004	2.42785e-31	Tumor	TMSB15B-AS1
	9.56713e-36	2.81349	0.015	0.001	2.85053e-31	Tumor	LINC02803
	9.98089e-36	3.73144	0.017	0.002	2.97381e-31	Tumor	AC119674.1
	1.12879e-35	2.79713	0.016	0.001	3.36324e-31	Tumor	AL360178.1
	1.18906e-35	4.09298	0.019	0.002	3.5428e-31	Tumor	DACH1
	1.20013e-35	3.82627	0.015	0.001	3.57579e-31	Tumor	RNF213-AS1
	1.20944e-35	2.13961	0.065	0.033	3.60351e-31	Tumor	FAT4
	1.4825e-35	2.46879	0.016	0.001	4.4171e-31	Tumor	AL157392.3
	1.6289e-35	6.33302	0.014	0	4.85331e-31	Tumor	AC105052.4
	1.71533e-35	2.43271	0.064	0.033	5.11082e-31	Tumor	THBS3
	2.07124e-35	2.16353	0.057	0.027	6.17125e-31	Tumor	NTNG1
	2.07322e-35	2.09068	0.09	0.053	6.17715e-31	Tumor	PCSK1
	2.45415e-35	2.80502	0.025	0.006	7.31214e-31	Tumor	DSCAM
	2.55746e-35	4.31957	0.014	0	7.61994e-31	Tumor	SHISAL1
	2.9521e-35	4.20164	0.018	0.002	8.79577e-31	Tumor	RBM24
	3.09423e-35	2.49423	0.027	0.007	9.21925e-31	Tumor	GTF2H4
	3.34156e-35	2.44578	0.04	0.015	9.95619e-31	Tumor	AL357153.2
	4.25536e-35	2.34336	0.281	0.267	1.26789e-30	Tumor	DUSP23
	4.67441e-35	5.07152	0.015	0.001	1.39274e-30	Tumor	AC002480.1
	5.14419e-35	5.36399	0.014	0	1.53271e-30	Tumor	CCN4
	6.13719e-35	3.49714	0.024	0.005	1.82858e-30	Tumor	AL359921.1
	6.29377e-35	3.09472	0.019	0.002	1.87523e-30	Tumor	VAX2
	6.39236e-35	3.64987	0.02	0.003	1.9046e-30	Tumor	AL132780.2
	6.96404e-35	3.12773	0.016	0.001	2.07494e-30	Tumor	RAMAC
	7.53756e-35	4.55066	0.016	0.001	2.24582e-30	Tumor	TSPAN11
	7.891e-35	8.53024	0.013	0	2.35112e-30	Tumor	LHX9
	7.89854e-35	4.94359	0.016	0.001	2.35337e-30	Tumor	AC119868.2
	8.74813e-35	3.60676	0.015	0.001	2.6065e-30	Tumor	AL390242.1
	8.75812e-35	4.97359	0.014	0	2.60948e-30	Tumor	BX470102.2
	9.9677e-35	2.11331	0.054	0.025	2.96988e-30	Tumor	GRIP1
	1.01582e-34	2.62541	0.018	0.002	3.02662e-30	Tumor	TLCD4
	1.17749e-34	4.68675	0.016	0.001	3.50833e-30	Tumor	CNTN6
	1.18424e-34	2.05896	0.046	0.019	3.52844e-30	Tumor	OSMR-AS1
	1.21938e-34	2.80939	0.026	0.006	3.63314e-30	Tumor	CEACAM19
	1.26346e-34	2.12588	0.061	0.03	3.76449e-30	Tumor	LRIG3
	1.6302e-34	2.20439	0.042	0.017	4.8572e-30	Tumor	PLK1
	1.78978e-34	3.68421	0.014	0	5.33266e-30	Tumor	AC097448.1
	1.92769e-34	2.45592	0.031	0.01	5.74355e-30	Tumor	C7orf25
	2.20774e-34	2.55615	0.032	0.01	6.57796e-30	Tumor	NOTCH3
	2.36602e-34	3.00388	0.014	0	7.04956e-30	Tumor	AL445123.2
	2.82188e-34	2.65026	0.03	0.009	8.4078e-30	Tumor	RAB38
	3.33413e-34	4.76975	0.02	0.003	9.93403e-30	Tumor	COL15A1
	3.68394e-34	2.07712	0.089	0.053	1.09763e-29	Tumor	TSTD3
	3.75017e-34	2.73925	0.019	0.002	1.11736e-29	Tumor	NELL1
	4.61816e-34	2.06345	0.128	0.089	1.37598e-29	Tumor	RPP21
	4.93829e-34	6.66227	0.015	0.001	1.47136e-29	Tumor	AC012404.1
	5.19374e-34	2.10926	0.114	0.075	1.54747e-29	Tumor	MRPS17
	7.57598e-34	4.47282	0.014	0	2.25726e-29	Tumor	AC004083.1
	7.8783e-34	2.98079	0.016	0.001	2.34734e-29	Tumor	ATP1A1-AS1
	8.49347e-34	2.3625	0.032	0.01	2.53063e-29	Tumor	GLRB
	9.1977e-34	4.29971	0.014	0.001	2.74045e-29	Tumor	TEX26
	1.23524e-33	4.24384	0.014	0	3.6804e-29	Tumor	AL359546.1
	1.29235e-33	4.09239	0.015	0.001	3.85054e-29	Tumor	AC008574.1
	1.38175e-33	3.74419	0.016	0.001	4.11692e-29	Tumor	AL356277.3
	1.55679e-33	2.4749	0.038	0.014	4.63845e-29	Tumor	THRB
	1.65262e-33	2.09638	0.114	0.076	4.92398e-29	Tumor	AK1
	1.74214e-33	4.12521	0.023	0.005	5.19072e-29	Tumor	SORCS3
	1.78168e-33	3.81496	0.02	0.003	5.30852e-29	Tumor	CPA4
	2.22361e-33	2.34585	0.036	0.013	6.62524e-29	Tumor	MCM10
	2.47522e-33	2.11101	0.086	0.051	7.37492e-29	Tumor	PFKM
	2.57338e-33	2.24714	0.071	0.039	7.66739e-29	Tumor	FZD6
	2.65409e-33	2.94973	0.016	0.001	7.90786e-29	Tumor	AL691420.1
	2.65681e-33	2.2757	0.016	0.001	7.91597e-29	Tumor	NIPBL-DT
	3.042e-33	3.40964	0.031	0.01	9.06363e-29	Tumor	PTCHD4
	3.14348e-33	4.12359	0.022	0.005	9.36601e-29	Tumor	EMID1
	3.3734e-33	2.73995	0.033	0.011	1.0051e-28	Tumor	AP001172.1
	3.91088e-33	8.1615	0.013	0	1.16525e-28	Tumor	AC124254.2
	3.99077e-33	2.33712	0.031	0.01	1.18905e-28	Tumor	PKN2-AS1
	4.03604e-33	2.91141	0.024	0.006	1.20254e-28	Tumor	PCDHGA1
	4.06243e-33	2.02331	0.044	0.019	1.2104e-28	Tumor	TRIP13
	4.65788e-33	2.37096	0.027	0.007	1.38782e-28	Tumor	MAMDC2-AS1
	4.95558e-33	3.98486	0.014	0.001	1.47651e-28	Tumor	LINC02615
	5.00695e-33	2.98207	0.017	0.002	1.49182e-28	Tumor	RXFP1
	5.2642e-33	3.52336	0.014	0	1.56847e-28	Tumor	Z99289.1
	5.28745e-33	2.70183	0.02	0.004	1.5754e-28	Tumor	AL136366.1
	5.64505e-33	4.03864	0.02	0.004	1.68194e-28	Tumor	CGREF1
	5.81831e-33	2.47931	0.037	0.014	1.73357e-28	Tumor	PGF
	5.89869e-33	3.43676	0.019	0.003	1.75752e-28	Tumor	TLE6
	6.29897e-33	5.65111	0.013	0	1.87678e-28	Tumor	AL590302.2
	6.54833e-33	3.65695	0.014	0.001	1.95108e-28	Tumor	AC044810.2
	7.28825e-33	4.28119	0.017	0.002	2.17154e-28	Tumor	NXPH4
	8.11165e-33	7.47309	0.013	0	2.41687e-28	Tumor	TBX5
	8.27674e-33	2.92128	0.016	0.001	2.46606e-28	Tumor	AL110114.1
	8.66641e-33	3.42762	0.022	0.005	2.58216e-28	Tumor	AGBL4
	9.88465e-33	2.16504	0.017	0.002	2.94513e-28	Tumor	AC008875.3
	1.51982e-32	3.21573	0.014	0.001	4.52831e-28	Tumor	AUXG01000058.1
	2.04803e-32	3.45822	0.023	0.005	6.10211e-28	Tumor	GRB14
	2.07887e-32	3.63091	0.015	0.001	6.194e-28	Tumor	AC079142.1
	2.27065e-32	2.68214	0.027	0.007	6.76539e-28	Tumor	SPATA17
	2.29463e-32	4.31449	0.016	0.001	6.83685e-28	Tumor	TMEM233
	2.49278e-32	2.13379	0.056	0.028	7.42723e-28	Tumor	SLC22A4
	2.69987e-32	3.87687	0.014	0.001	8.04427e-28	Tumor	AP002748.4
	2.84667e-32	3.57016	0.013	0	8.48165e-28	Tumor	SIRLNT
	3.1294e-32	4.93678	0.018	0.002	9.32406e-28	Tumor	CD1D
	3.23087e-32	4.64953	0.014	0.001	9.62636e-28	Tumor	AC023282.1
	3.85668e-32	4.16855	0.014	0.001	1.1491e-27	Tumor	OLFML2A
	4.56207e-32	3.37662	0.014	0.001	1.35927e-27	Tumor	ALPL
	5.35509e-32	4.5756	0.014	0.001	1.59555e-27	Tumor	NHEJ1
	5.44916e-32	4.05824	0.019	0.003	1.62358e-27	Tumor	AL391117.1
	5.47614e-32	4.42375	0.015	0.001	1.63161e-27	Tumor	U91319.1
	5.59669e-32	2.10244	0.054	0.026	1.66753e-27	Tumor	RAP1GAP2
	7.46971e-32	2.33486	0.053	0.026	2.2256e-27	Tumor	AL691403.1
	8.1812e-32	4.58275	0.016	0.002	2.43759e-27	Tumor	AP002784.1
	8.51355e-32	3.58418	0.021	0.004	2.53661e-27	Tumor	F2RL1
	8.85226e-32	5.36422	0.013	0	2.63753e-27	Tumor	PCDH19
	1.17065e-31	3.76909	0.016	0.002	3.48794e-27	Tumor	THEGL
	1.27253e-31	2.83661	0.018	0.003	3.79152e-27	Tumor	JPH4
	1.36082e-31	8.09914	0.012	0	4.05455e-27	Tumor	TFAP2B
	1.76215e-31	3.53014	0.017	0.002	5.25032e-27	Tumor	AC244517.11
	1.79849e-31	3.39872	0.016	0.002	5.35861e-27	Tumor	LINC00960
	1.9256e-31	4.09065	0.013	0	5.73734e-27	Tumor	AC002460.2
	2.69768e-31	3.99738	0.015	0.001	8.03774e-27	Tumor	ACTC1
	3.06125e-31	5.41949	0.013	0	9.12099e-27	Tumor	ADAMTS9-AS1
	3.71856e-31	2.66976	0.015	0.001	1.10794e-26	Tumor	CFAP410
	4.59181e-31	3.56826	0.02	0.004	1.36813e-26	Tumor	CRTAC1
	5.74847e-31	2.99505	0.014	0.001	1.71276e-26	Tumor	CNTFR
	5.83627e-31	3.02543	0.013	0.001	1.73892e-26	Tumor	NPNT
	6.149e-31	3.01441	0.024	0.007	1.83209e-26	Tumor	KCTD16
	6.18065e-31	3.50548	0.013	0	1.84152e-26	Tumor	SEMA3F
	6.1909e-31	3.72109	0.013	0.001	1.84458e-26	Tumor	NOTCH2NLA
	6.60679e-31	4.36861	0.015	0.002	1.96849e-26	Tumor	BDKRB2
	6.83954e-31	2.32676	0.029	0.009	2.03784e-26	Tumor	LIN37
	6.90426e-31	2.11714	0.117	0.08	2.05712e-26	Tumor	ASB3
	8.07903e-31	3.28687	0.016	0.002	2.40715e-26	Tumor	AC008269.1
	8.39847e-31	2.49294	0.027	0.008	2.50233e-26	Tumor	ROR2
	9.88276e-31	3.04273	0.013	0.001	2.94457e-26	Tumor	AP002851.1
	9.90251e-31	2.06737	0.071	0.04	2.95045e-26	Tumor	LINC01503
	1.03262e-30	3.97943	0.012	0	3.0767e-26	Tumor	LINC00173
	1.08407e-30	2.25539	0.032	0.012	3.22999e-26	Tumor	C5orf66
	1.1929e-30	2.97792	0.013	0.001	3.55425e-26	Tumor	AL391840.3
	1.22452e-30	2.0864	0.078	0.046	3.64845e-26	Tumor	FHL3
	1.61982e-30	3.28296	0.021	0.004	4.82625e-26	Tumor	CFAP221
	1.69772e-30	2.58563	0.015	0.001	5.05836e-26	Tumor	UBE2D3-AS1
	1.7747e-30	2.00656	0.045	0.02	5.2877e-26	Tumor	AC105942.1
	2.09293e-30	4.5668	0.013	0	6.23587e-26	Tumor	AL732509.1
	2.32445e-30	2.10425	0.038	0.016	6.92569e-26	Tumor	AC068282.1
	2.53173e-30	2.44432	0.021	0.005	7.5433e-26	Tumor	PPP1R3C
	2.58168e-30	5.40513	0.017	0.002	7.69213e-26	Tumor	GABRB1
	2.67279e-30	4.40837	0.012	0	7.96357e-26	Tumor	LINC02614
	2.67588e-30	3.75502	0.013	0	7.97278e-26	Tumor	AP002381.2
	2.68389e-30	4.61053	0.012	0	7.99666e-26	Tumor	AC005532.1
	2.97242e-30	2.15331	0.086	0.053	8.85633e-26	Tumor	OCRL
	3.08702e-30	2.07251	0.048	0.023	9.19776e-26	Tumor	EGFL7
	3.45218e-30	2.12692	0.036	0.014	1.02858e-25	Tumor	KRT8
	3.54121e-30	3.13966	0.013	0.001	1.0551e-25	Tumor	LINC02268
	3.55818e-30	2.57085	0.016	0.002	1.06016e-25	Tumor	HEXD
	3.93031e-30	7.33211	0.012	0	1.17104e-25	Tumor	AC090124.2
	3.9657e-30	2.68696	0.013	0.001	1.18158e-25	Tumor	Z99127.4
	4.20133e-30	3.16251	0.02	0.004	1.25179e-25	Tumor	LINC01322
	4.21468e-30	6.40853	0.013	0.001	1.25576e-25	Tumor	KCNE5
	4.3234e-30	3.52387	0.013	0	1.28816e-25	Tumor	AC024558.2
	4.89422e-30	2.50943	0.032	0.012	1.45823e-25	Tumor	FBXO16
	5.02674e-30	4.91141	0.019	0.003	1.49772e-25	Tumor	PRLR
	5.30275e-30	3.34091	0.017	0.002	1.57995e-25	Tumor	JCAD
	5.5015e-30	4.88609	0.012	0	1.63917e-25	Tumor	LINC00641
	6.92302e-30	3.57808	0.018	0.003	2.06271e-25	Tumor	AC138123.1
	8.37586e-30	2.98241	0.025	0.007	2.49559e-25	Tumor	SLC7A2
	9.2803e-30	2.78461	0.028	0.009	2.76507e-25	Tumor	SKA1
	1.09197e-29	7.69933	0.012	0	3.25354e-25	Tumor	TMEM196
	1.09246e-29	4.16547	0.013	0.001	3.25497e-25	Tumor	AL353807.5
	1.35598e-29	2.48426	0.016	0.002	4.04014e-25	Tumor	AL731577.2
	1.43698e-29	5.06511	0.012	0	4.28148e-25	Tumor	AC113418.1
	1.45916e-29	5.48604	0.013	0.001	4.34756e-25	Tumor	ADRA1B
	1.58241e-29	4.81673	0.015	0.002	4.71479e-25	Tumor	AC007099.1
	1.63446e-29	2.29613	0.014	0.001	4.86988e-25	Tumor	AL096870.8
	1.73633e-29	3.75204	0.014	0.001	5.1734e-25	Tumor	AC090409.1
	1.76736e-29	2.75712	0.026	0.008	5.26585e-25	Tumor	NEK2
	1.85197e-29	2.4628	0.021	0.005	5.51793e-25	Tumor	DLL3
	1.88656e-29	2.79341	0.028	0.009	5.62101e-25	Tumor	LINC02542
	2.20826e-29	3.52359	0.012	0.001	6.57951e-25	Tumor	AL513164.1
	2.58125e-29	3.74604	0.018	0.003	7.69084e-25	Tumor	MAPK4
	2.65311e-29	3.94553	0.013	0.001	7.90495e-25	Tumor	LINC01748
	2.74927e-29	4.26372	0.012	0.001	8.19144e-25	Tumor	LINC01117
	2.80973e-29	2.68483	0.021	0.005	8.37159e-25	Tumor	AL109811.2
	2.94013e-29	3.14643	0.012	0	8.76012e-25	Tumor	FENDRR
	2.97667e-29	3.01758	0.014	0.001	8.86898e-25	Tumor	EGF
	3.31887e-29	3.67418	0.014	0.001	9.88856e-25	Tumor	PTPRR
	3.32624e-29	3.32696	0.013	0.001	9.91053e-25	Tumor	ITGA9-AS1
	3.37258e-29	3.02014	0.023	0.006	1.00486e-24	Tumor	LINC01776
	3.47089e-29	2.24064	0.095	0.061	1.03415e-24	Tumor	SCARA3
	3.57794e-29	2.90636	0.029	0.01	1.06605e-24	Tumor	HIST1H3F
	3.70482e-29	4.55397	0.012	0	1.10385e-24	Tumor	KDM7A-DT
	3.72924e-29	3.23512	0.017	0.003	1.11113e-24	Tumor	HS6ST3
	3.76103e-29	4.23576	0.014	0.001	1.1206e-24	Tumor	APCDD1L
	4.14226e-29	2.81883	0.014	0.002	1.23419e-24	Tumor	RIT2
	4.38224e-29	2.36613	0.013	0.001	1.30569e-24	Tumor	AC129803.1
	4.39133e-29	2.15841	0.032	0.012	1.3084e-24	Tumor	CDC45
	6.6397e-29	4.21044	0.013	0.001	1.9783e-24	Tumor	AC003093.1
	7.11743e-29	2.3211	0.039	0.017	2.12064e-24	Tumor	IQCH
	7.14236e-29	3.69842	0.012	0.001	2.12807e-24	Tumor	TLCD3A
	7.62935e-29	4.96592	0.012	0	2.27316e-24	Tumor	HOXA6
	8.35761e-29	2.62336	0.014	0.001	2.49015e-24	Tumor	SEPTIN1
	8.91616e-29	8.91352	0.011	0	2.65657e-24	Tumor	AP000676.5
	9.03865e-29	2.1841	0.043	0.02	2.69307e-24	Tumor	PAK3
	9.2052e-29	4.71127	0.012	0.001	2.74269e-24	Tumor	DLGAP1-AS4
	1.03706e-28	2.38619	0.033	0.012	3.08993e-24	Tumor	LIX1-AS1
	1.4143e-28	2.73485	0.043	0.02	4.21391e-24	Tumor	LINC02381
	1.54632e-28	3.75902	0.014	0.001	4.60725e-24	Tumor	GLI2
	1.75012e-28	3.2113	0.024	0.007	5.21449e-24	Tumor	RAMP2
	1.78229e-28	3.11474	0.013	0.001	5.31034e-24	Tumor	AC127502.2
	2.2339e-28	3.78307	0.012	0.001	6.65592e-24	Tumor	AC104389.5
	2.34557e-28	2.21276	0.015	0.002	6.98863e-24	Tumor	GDF5
	2.45801e-28	3.54944	0.011	0	7.32365e-24	Tumor	HOXC13
	3.74893e-28	3.34891	0.023	0.006	1.11699e-23	Tumor	MXRA8
	3.95352e-28	6.10425	0.011	0	1.17795e-23	Tumor	AC005400.1
	4.11373e-28	3.88015	0.011	0	1.22569e-23	Tumor	HYMAI
	4.16308e-28	4.12296	0.011	0	1.24039e-23	Tumor	LINC02853
	4.68886e-28	2.00594	0.034	0.013	1.39704e-23	Tumor	ITGB1-DT
	4.95904e-28	4.69509	0.012	0.001	1.47755e-23	Tumor	PAX9
	5.02142e-28	3.00093	0.012	0	1.49613e-23	Tumor	GNGT1
	5.22668e-28	3.53593	0.013	0.001	1.55729e-23	Tumor	LINC01050
	5.79785e-28	3.58401	0.013	0.001	1.72747e-23	Tumor	LINC00941
	6.27655e-28	2.12066	0.028	0.01	1.8701e-23	Tumor	RNASE4
	6.77563e-28	3.3674	0.011	0	2.0188e-23	Tumor	AC103702.1
	7.08887e-28	3.22747	0.037	0.016	2.11213e-23	Tumor	TENM1
	7.56688e-28	5.95216	0.013	0.001	2.25455e-23	Tumor	MYBPH
	8.42623e-28	2.44542	0.028	0.01	2.51059e-23	Tumor	AC239799.2
	9.71185e-28	5.57139	0.012	0.001	2.89364e-23	Tumor	BX322562.1
	1.04719e-27	7.49269	0.011	0	3.1201e-23	Tumor	PRSS35
	1.17432e-27	3.845	0.016	0.002	3.49888e-23	Tumor	UNC80
	1.21872e-27	2.92742	0.024	0.007	3.63117e-23	Tumor	TICRR
	1.24164e-27	3.73036	0.013	0.001	3.69946e-23	Tumor	GRIA1
	1.27759e-27	3.07703	0.019	0.004	3.80657e-23	Tumor	AL136164.2
	1.34211e-27	2.15089	0.042	0.019	3.99882e-23	Tumor	TEX22
	1.35828e-27	2.14431	0.013	0.001	4.047e-23	Tumor	PPP1R14B-AS1
	1.42396e-27	3.03652	0.022	0.006	4.24268e-23	Tumor	AC138207.2
	1.43119e-27	3.22231	0.014	0.002	4.26424e-23	Tumor	BEST3
	1.55197e-27	2.72989	0.013	0.001	4.62409e-23	Tumor	AC012459.1
	1.68328e-27	5.60953	0.012	0	5.01533e-23	Tumor	TENT5B
	1.92221e-27	4.49399	0.012	0.001	5.72723e-23	Tumor	ATP13A5
	2.23e-27	2.477	0.024	0.007	6.64428e-23	Tumor	MN1
	2.24055e-27	2.85217	0.014	0.001	6.67571e-23	Tumor	INSYN2B
	2.24969e-27	3.10376	0.014	0.002	6.70295e-23	Tumor	AC108863.2
	2.35086e-27	4.2634	0.012	0.001	7.0044e-23	Tumor	AC004870.4
	2.69082e-27	7.29943	0.011	0	8.01731e-23	Tumor	AL133330.1
	3.4344e-27	2.65571	0.022	0.006	1.02328e-22	Tumor	LRP3
	3.44481e-27	4.36928	0.011	0	1.02638e-22	Tumor	AL136169.1
	4.18532e-27	3.02401	0.012	0.001	1.24702e-22	Tumor	AC084198.2
	4.45902e-27	2.07094	0.032	0.013	1.32857e-22	Tumor	TMCC1-AS1
	4.54247e-27	3.89508	0.011	0	1.35343e-22	Tumor	AL390755.1
	4.76582e-27	2.42722	0.013	0.001	1.41998e-22	Tumor	CBR3-AS1
	4.9922e-27	2.00875	0.02	0.005	1.48743e-22	Tumor	NFIA-AS2
	5.0461e-27	2.53016	0.038	0.017	1.50349e-22	Tumor	CLTCL1
	5.37802e-27	3.19301	0.027	0.009	1.60238e-22	Tumor	CLDN1
	5.56422e-27	4.36913	0.01	0	1.65786e-22	Tumor	AC004870.2
	5.86202e-27	4.1735	0.014	0.002	1.74659e-22	Tumor	AC005699.1
	6.52459e-27	2.50041	0.089	0.058	1.944e-22	Tumor	TNFRSF21
	7.1927e-27	6.77005	0.011	0	2.14307e-22	Tumor	AC073365.1
	8.48115e-27	3.74802	0.011	0.001	2.52696e-22	Tumor	SEMA5B
	8.50003e-27	6.79068	0.011	0.001	2.53258e-22	Tumor	AC007091.1
	8.63449e-27	3.15525	0.023	0.007	2.57265e-22	Tumor	CNTN1
	8.85762e-27	6.08314	0.012	0.001	2.63913e-22	Tumor	ADRA1A
	8.87932e-27	7.36017	0.01	0	2.64559e-22	Tumor	LINC01351
	8.89476e-27	2.45494	0.046	0.023	2.65019e-22	Tumor	SLC1A2
	8.96134e-27	2.3691	0.046	0.023	2.67003e-22	Tumor	ACAD11
	1.01035e-26	2.31597	0.025	0.008	3.01033e-22	Tumor	BEND7
	1.11601e-26	3.53409	0.012	0.001	3.32514e-22	Tumor	AC127035.1
	1.12248e-26	6.39579	0.011	0	3.34442e-22	Tumor	AC005062.1
	1.3762e-26	2.83527	0.025	0.008	4.10038e-22	Tumor	MUC1
	1.47855e-26	5.16407	0.011	0	4.40535e-22	Tumor	KCNJ8
	1.53635e-26	3.18615	0.02	0.005	4.57756e-22	Tumor	FRMPD3
	1.55933e-26	2.74224	0.012	0.001	4.64603e-22	Tumor	MAP3K2-DT
	1.65006e-26	3.60367	0.012	0.001	4.91637e-22	Tumor	NR2F2-AS1
	1.65876e-26	2.2405	0.012	0.001	4.94228e-22	Tumor	AC092338.3
	1.88231e-26	2.01693	0.012	0.001	5.60835e-22	Tumor	OTOGL
	2.37177e-26	6.72432	0.01	0	7.06668e-22	Tumor	PAX3
	2.39137e-26	2.98117	0.024	0.007	7.12508e-22	Tumor	IGSF1
	3.03255e-26	4.07745	0.017	0.003	9.03548e-22	Tumor	AC234582.1
	3.0472e-26	5.82305	0.01	0	9.07913e-22	Tumor	NKAIN3-IT1
	3.63955e-26	5.709	0.011	0.001	1.0844e-21	Tumor	AL359555.4
	3.72613e-26	2.52832	0.022	0.006	1.1102e-21	Tumor	AL355574.1
	3.80253e-26	4.74827	0.011	0	1.13296e-21	Tumor	MASP1
	4.32077e-26	6.16103	0.011	0.001	1.28737e-21	Tumor	LEMD1
	4.96149e-26	2.2241	0.038	0.017	1.47827e-21	Tumor	PHKA1
	5.01287e-26	6.05096	0.012	0.001	1.49358e-21	Tumor	AC016723.1
	5.02873e-26	3.21073	0.011	0	1.49831e-21	Tumor	AC022210.2
	5.25568e-26	2.55217	0.019	0.004	1.56593e-21	Tumor	KLF5
	5.81779e-26	2.01733	0.075	0.045	1.73341e-21	Tumor	B3GLCT
	6.68926e-26	3.03329	0.013	0.002	1.99306e-21	Tumor	TRNP1
	7.71412e-26	6.57662	0.011	0	2.29842e-21	Tumor	AC093801.1
	7.72083e-26	2.01182	0.05	0.026	2.30042e-21	Tumor	LNX1
	8.19091e-26	2.87845	0.011	0	2.44048e-21	Tumor	AC105114.2
	9.55214e-26	2.4092	0.046	0.024	2.84606e-21	Tumor	LGR5
	9.55311e-26	2.45845	0.031	0.012	2.84635e-21	Tumor	CYP1B1-AS1
	9.73978e-26	2.03674	0.02	0.005	2.90197e-21	Tumor	ZNF709
	9.76869e-26	2.84422	0.03	0.012	2.91058e-21	Tumor	AL139393.1
	9.97846e-26	2.41606	0.02	0.005	2.97308e-21	Tumor	ACY1
	1.00011e-25	2.82451	0.013	0.001	2.97982e-21	Tumor	AC010359.3
	1.0075e-25	3.34754	0.011	0	3.00185e-21	Tumor	AC027243.3
	1.02864e-25	3.38848	0.015	0.002	3.06482e-21	Tumor	PPFIA2-AS1
	1.3164e-25	2.75636	0.011	0	3.92221e-21	Tumor	AC010201.3
	1.34477e-25	5.57557	0.012	0.001	4.00673e-21	Tumor	B3GALT1
	1.49749e-25	2.73635	0.014	0.002	4.46176e-21	Tumor	RALYL
	1.56467e-25	4.17125	0.011	0	4.66194e-21	Tumor	AC011586.1
	1.56792e-25	3.15796	0.015	0.002	4.67161e-21	Tumor	LINC02060
	1.63434e-25	5.90591	0.01	0	4.86952e-21	Tumor	AC092445.1
	1.66537e-25	2.08855	0.034	0.015	4.96197e-21	Tumor	AC021231.1
	2.03084e-25	6.70464	0.01	0	6.05089e-21	Tumor	AC103853.1
	2.23015e-25	3.25485	0.011	0.001	6.64472e-21	Tumor	HAPLN1
	2.23377e-25	3.28253	0.022	0.007	6.65553e-21	Tumor	AC012447.1
	2.59157e-25	4.72768	0.011	0	7.72159e-21	Tumor	CARNMT1-AS1
	2.85758e-25	6.94098	0.011	0.001	8.51417e-21	Tumor	AC009884.1
	3.1648e-25	2.67284	0.012	0.001	9.42951e-21	Tumor	MEF2B
	3.36698e-25	4.49358	0.01	0	1.00319e-20	Tumor	AC009522.1
	3.84288e-25	2.24948	0.022	0.006	1.14498e-20	Tumor	SERPINE3
	3.99246e-25	3.08713	0.012	0.001	1.18955e-20	Tumor	AC002456.1
	4.42072e-25	2.84636	0.012	0.001	1.31715e-20	Tumor	AC025809.1
	4.89573e-25	3.51005	0.011	0.001	1.45868e-20	Tumor	NDUFA6-DT
	5.05143e-25	2.76558	0.012	0.001	1.50507e-20	Tumor	KCTD14
	5.82222e-25	2.87456	0.012	0.001	1.73473e-20	Tumor	AC099343.3
	6.83575e-25	2.04568	0.051	0.027	2.03671e-20	Tumor	ZNF625
	7.12344e-25	2.72309	0.065	0.039	2.12243e-20	Tumor	NOS1AP
	8.8193e-25	4.09252	0.01	0	2.62771e-20	Tumor	AC013287.1
	9.63164e-25	2.96596	0.013	0.001	2.86975e-20	Tumor	ADGRA2
	1.07105e-24	8.19404	0.01	0	3.1912e-20	Tumor	AF131215.6
	1.13641e-24	3.389	0.01	0	3.38593e-20	Tumor	AC079226.2
	1.17997e-24	2.63398	0.02	0.006	3.51571e-20	Tumor	ANKRD7
	1.33911e-24	4.35186	0.01	0	3.98988e-20	Tumor	2024-03-04
	1.40991e-24	4.7465	0.01	0	4.20082e-20	Tumor	SOX9-AS1
	1.47825e-24	2.81772	0.012	0.001	4.40445e-20	Tumor	KLF3-AS1
	1.73375e-24	2.08723	0.055	0.031	5.1657e-20	Tumor	KIF2C
	1.78976e-24	4.36254	0.01	0	5.33258e-20	Tumor	AC124854.1
	1.87751e-24	2.39515	0.029	0.011	5.59403e-20	Tumor	PKN3
	2.44466e-24	3.43247	0.023	0.008	7.28386e-20	Tumor	RGMA
	2.92691e-24	3.68695	0.01	0	8.72073e-20	Tumor	AC005052.2
	2.97304e-24	3.67758	0.011	0.001	8.85817e-20	Tumor	CARD10
	3.05273e-24	2.62833	0.015	0.003	9.0956e-20	Tumor	WNT7B
	3.16121e-24	2.5786	0.035	0.016	9.41881e-20	Tumor	IQGAP3
	3.54216e-24	2.67663	0.015	0.003	1.05539e-19	Tumor	AC004816.1
	3.7286e-24	2.57284	0.011	0.001	1.11094e-19	Tumor	BX284613.2
	3.91588e-24	2.46246	0.044	0.022	1.16674e-19	Tumor	MEGF11
	4.36686e-24	3.26588	0.01	0.001	1.30111e-19	Tumor	AL157702.2
	4.37509e-24	2.60437	0.028	0.011	1.30356e-19	Tumor	ARHGEF25
	4.45869e-24	3.03109	0.01	0.001	1.32847e-19	Tumor	HELLPAR
	4.5525e-24	2.34696	0.013	0.002	1.35642e-19	Tumor	AC018797.3
	4.61161e-24	7.45061	0.01	0	1.37403e-19	Tumor	AC069437.1
	4.81745e-24	3.93465	0.015	0.003	1.43536e-19	Tumor	AL592166.1
	5.12808e-24	2.16028	0.028	0.011	1.52791e-19	Tumor	FZD2
	5.32493e-24	4.02149	0.014	0.002	1.58656e-19	Tumor	SATB2-AS1
	5.96339e-24	4.39984	0.01	0	1.77679e-19	Tumor	AL139106.1
	5.9962e-24	2.46288	0.01	0	1.78657e-19	Tumor	LRRTM1
	6.14409e-24	2.1548	0.086	0.058	1.83063e-19	Tumor	KALRN
	6.20839e-24	2.7556	0.034	0.015	1.84979e-19	Tumor	GPRC5C
	7.00762e-24	2.27717	0.025	0.009	2.08792e-19	Tumor	METTL7B
	7.18614e-24	2.91005	0.01	0.001	2.14111e-19	Tumor	AC016042.1
	7.36166e-24	2.97634	0.011	0.001	2.19341e-19	Tumor	LHFPL3-AS1
	7.50535e-24	6.19247	0.012	0.002	2.23622e-19	Tumor	NXPH1
	7.52197e-24	7.04683	0.01	0	2.24117e-19	Tumor	LINC01151
	7.57681e-24	3.49887	0.011	0.001	2.25751e-19	Tumor	AL110292.1
	9.41275e-24	2.77885	0.025	0.009	2.80453e-19	Tumor	AC092574.2
	9.71462e-24	3.80848	0.01	0	2.89447e-19	Tumor	AL049646.1
	1.10561e-23	2.5138	0.011	0.001	3.29416e-19	Tumor	AC083862.3
	1.1301e-23	3.42551	0.014	0.002	3.36712e-19	Tumor	MLC1
	1.14029e-23	2.93191	0.018	0.005	3.39748e-19	Tumor	GPR1
	1.15023e-23	3.7729	0.01	0.001	3.42712e-19	Tumor	STARD7-AS1
	1.2112e-23	2.1695	0.018	0.005	3.60877e-19	Tumor	PRDM6
	1.32743e-23	2.12491	0.027	0.01	3.95508e-19	Tumor	CA3
	1.51008e-23	3.39667	0.01	0	4.49929e-19	Tumor	AC093334.1
	1.55419e-23	2.19099	0.042	0.021	4.6307e-19	Tumor	AC008915.2
	1.57658e-23	2.87775	0.01	0	4.69742e-19	Tumor	Z95331.1
	1.742e-23	3.62287	0.011	0.001	5.19029e-19	Tumor	AC083799.1
	1.80835e-23	2.80044	0.016	0.003	5.38799e-19	Tumor	AC010809.1
	2.01551e-23	3.77874	0.017	0.004	6.0052e-19	Tumor	VEPH1
	2.15963e-23	2.17314	0.03	0.013	6.43461e-19	Tumor	SMOC1
	2.27892e-23	2.64031	0.018	0.005	6.79004e-19	Tumor	CDH24
	2.82013e-23	2.20569	0.022	0.007	8.40258e-19	Tumor	HIST1H3J
	3.10795e-23	4.29348	0.01	0	9.26013e-19	Tumor	C9orf92
	3.42023e-23	2.64022	0.019	0.006	1.01906e-18	Tumor	CPNE4
	3.61332e-23	2.19577	0.02	0.006	1.07659e-18	Tumor	DDX11-AS1
	4.14899e-23	3.82673	0.011	0.001	1.23619e-18	Tumor	AC019068.1
	4.3707e-23	2.83411	0.019	0.005	1.30225e-18	Tumor	MSI1
	4.43087e-23	5.5479	0.012	0.001	1.32018e-18	Tumor	USP43
	4.48368e-23	2.39766	0.016	0.003	1.33591e-18	Tumor	RTN4RL2
	4.76417e-23	2.21831	0.031	0.013	1.41948e-18	Tumor	SNX32
	4.92283e-23	2.21015	0.032	0.014	1.46676e-18	Tumor	ZNF749
	4.94594e-23	4.83403	0.01	0	1.47364e-18	Tumor	AL354836.1
	5.41738e-23	5.77257	0.012	0.001	1.61411e-18	Tumor	AL355312.3
	5.98497e-23	2.84387	0.036	0.017	1.78322e-18	Tumor	AC027117.2
	6.0061e-23	4.31014	0.011	0.001	1.78952e-18	Tumor	C5orf38
	7.49568e-23	4.17179	0.011	0.001	2.23334e-18	Tumor	AC110023.1
	8.61382e-23	3.25354	0.01	0.001	2.56649e-18	Tumor	AL022162.1
	9.16138e-23	3.09777	0.011	0.001	2.72963e-18	Tumor	AL499604.1
	1.00178e-22	2.84998	0.018	0.005	2.9848e-18	Tumor	NEXN-AS1
	1.05197e-22	2.0147	0.046	0.025	3.13433e-18	Tumor	RNF217-AS1
	1.2248e-22	2.34297	0.016	0.004	3.64929e-18	Tumor	NDST3
	1.23837e-22	2.46786	0.03	0.013	3.68973e-18	Tumor	SLC27A6
	1.40919e-22	2.62717	0.01	0.001	4.19868e-18	Tumor	AC108519.1
	1.41435e-22	2.38142	0.027	0.011	4.21406e-18	Tumor	KIF24
	1.52312e-22	4.0061	0.012	0.001	4.53815e-18	Tumor	CXCL11
	1.53018e-22	2.07129	0.036	0.017	4.55916e-18	Tumor	XRCC2
	1.65705e-22	3.92566	0.01	0	4.93717e-18	Tumor	LINC02666
	1.79274e-22	3.02739	0.013	0.002	5.34148e-18	Tumor	BX640514.2
	2.21667e-22	2.38636	0.042	0.022	6.60456e-18	Tumor	MMP1
	2.38468e-22	3.19451	0.01	0.001	7.10515e-18	Tumor	MGAT5B
	2.52626e-22	2.45812	0.058	0.034	7.52698e-18	Tumor	IL7
	2.58626e-22	2.05622	0.027	0.011	7.70575e-18	Tumor	DPY19L2
	2.7353e-22	2.10089	0.051	0.028	8.14984e-18	Tumor	AC090152.1
	2.90556e-22	2.62642	0.012	0.002	8.65712e-18	Tumor	TAFA5
	2.92866e-22	4.80379	0.01	0.001	8.72594e-18	Tumor	AC084346.1
	2.98191e-22	4.36669	0.012	0.002	8.88459e-18	Tumor	GABBR2
	3.07773e-22	2.25854	0.01	0.001	9.17011e-18	Tumor	WISP1
	3.16306e-22	2.37498	0.01	0.001	9.42435e-18	Tumor	AL445623.2
	3.24046e-22	4.06292	0.011	0.001	9.65495e-18	Tumor	AC079465.1
	3.97827e-22	2.09288	0.012	0.002	1.18533e-17	Tumor	AC073475.1
	4.21826e-22	2.02907	0.012	0.002	1.25683e-17	Tumor	ZRANB2-AS2
	4.60372e-22	2.91101	0.018	0.005	1.37168e-17	Tumor	AC104827.1
	5.78987e-22	2.42117	0.045	0.024	1.72509e-17	Tumor	ENTPD7
	6.7304e-22	3.56195	0.013	0.002	2.00532e-17	Tumor	HFM1
	6.75926e-22	2.28132	0.047	0.025	2.01392e-17	Tumor	NOP2
	6.90908e-22	3.77337	0.014	0.003	2.05856e-17	Tumor	DCX
	6.99724e-22	3.13554	0.013	0.002	2.08483e-17	Tumor	PTCHD1
	7.24918e-22	3.51591	0.011	0.001	2.15989e-17	Tumor	ATP2B2
	8.1396e-22	5.05988	0.01	0.001	2.42519e-17	Tumor	AC016766.1
	9.24071e-22	2.60538	0.041	0.021	2.75327e-17	Tumor	FXYD6
	1.07452e-21	4.06025	0.01	0.001	3.20154e-17	Tumor	AL117336.2
	1.11276e-21	2.22349	0.013	0.002	3.31548e-17	Tumor	AC091078.1
	1.17854e-21	4.70315	0.011	0.001	3.51145e-17	Tumor	AC005165.1
	1.23928e-21	2.68924	0.011	0.001	3.69242e-17	Tumor	SEPTIN7-AS1
	1.34621e-21	3.30791	0.01	0.001	4.01103e-17	Tumor	AC091646.1
	1.44304e-21	5.59741	0.01	0.001	4.29954e-17	Tumor	POU2F3
	1.91067e-21	2.01552	0.052	0.03	5.69286e-17	Tumor	WDR78
	2.19742e-21	2.21914	0.025	0.01	6.5472e-17	Tumor	AC017002.5
	2.22504e-21	2.08583	0.022	0.007	6.62949e-17	Tumor	AC004076.1
	2.36723e-21	2.75721	0.01	0.001	7.05315e-17	Tumor	LINC01828
	2.37493e-21	2.92438	0.01	0.001	7.07609e-17	Tumor	ABCA4
	2.73799e-21	2.72808	0.022	0.008	8.15785e-17	Tumor	AL158071.1
	2.90135e-21	2.34523	0.028	0.012	8.64459e-17	Tumor	OOEP
	3.61534e-21	2.87484	0.01	0.001	1.07719e-16	Tumor	CCDC200
	3.9083e-21	3.16237	0.01	0.001	1.16448e-16	Tumor	STAC2
	3.94309e-21	5.76121	0.01	0.001	1.17484e-16	Tumor	ADAMTS16
	4.81709e-21	2.50744	0.019	0.006	1.43525e-16	Tumor	TMEM200C
	5.6175e-21	3.84301	0.01	0.001	1.67373e-16	Tumor	NOTCH2NLC
	5.98049e-21	3.92884	0.014	0.003	1.78189e-16	Tumor	GGT5
	6.34011e-21	2.51026	0.029	0.013	1.88904e-16	Tumor	AC079921.1
	7.36509e-21	3.3471	0.017	0.005	2.19443e-16	Tumor	GRIK5
	8.14153e-21	2.95194	0.013	0.003	2.42577e-16	Tumor	KCNV2
	9.27175e-21	2.46903	0.01	0.001	2.76252e-16	Tumor	AP001021.3
	1.07124e-20	4.69953	0.01	0.001	3.19175e-16	Tumor	FOXP4-AS1
	1.13985e-20	2.45873	0.03	0.014	3.3962e-16	Tumor	GIPC2
	1.18587e-20	3.18747	0.016	0.004	3.5333e-16	Tumor	MKRN2OS
	1.19396e-20	3.08716	0.011	0.002	3.5574e-16	Tumor	PIK3C2G
	1.25919e-20	3.58377	0.01	0.001	3.75175e-16	Tumor	ERICH3
	1.31425e-20	3.13504	0.011	0.001	3.9158e-16	Tumor	AC005050.3
	1.36538e-20	2.36924	0.027	0.011	4.06814e-16	Tumor	SLFNL1-AS1
	2.45189e-20	2.09015	0.1	0.073	7.3054e-16	Tumor	SPECC1L
	2.6e-20	2.08233	0.011	0.001	7.74669e-16	Tumor	AC104248.1
	2.66126e-20	3.19159	0.01	0.001	7.92924e-16	Tumor	AC006141.1
	2.87921e-20	2.88224	0.017	0.005	8.57861e-16	Tumor	FSIP2-AS1
	3.48374e-20	2.48641	0.014	0.003	1.03798e-15	Tumor	AC079385.1
	3.93283e-20	5.16138	0.011	0.002	1.17179e-15	Tumor	LMNTD1
	3.958e-20	2.51584	0.02	0.007	1.17929e-15	Tumor	AC093535.1
	4.16413e-20	2.30306	0.027	0.012	1.2407e-15	Tumor	AF127577.2
	4.40438e-20	2.74401	0.016	0.004	1.31229e-15	Tumor	BGLAP
	5.42686e-20	3.46391	0.01	0.001	1.61693e-15	Tumor	AL359715.1
	5.49643e-20	2.66454	0.014	0.004	1.63766e-15	Tumor	HOXC4
	5.53592e-20	2.57306	0.017	0.005	1.64943e-15	Tumor	NRGN
	6.73581e-20	3.07413	0.015	0.004	2.00693e-15	Tumor	HKDC1
	7.11821e-20	2.36669	0.021	0.008	2.12087e-15	Tumor	AC090921.1
	7.19527e-20	2.67604	0.014	0.004	2.14383e-15	Tumor	SULT1C4
	7.45831e-20	2.50114	0.029	0.013	2.2222e-15	Tumor	AP3B2
	8.00819e-20	3.35378	0.021	0.008	2.38604e-15	Tumor	ENHO
	9.78761e-20	2.29536	0.016	0.005	2.91622e-15	Tumor	LINC01483
	1.07866e-19	5.04268	0.01	0.001	3.21387e-15	Tumor	DNAH5
	1.14014e-19	4.14416	0.011	0.002	3.39706e-15	Tumor	WNK2
	1.26882e-19	2.13306	0.033	0.016	3.78045e-15	Tumor	AL139807.1
	1.40597e-19	4.20539	0.012	0.002	4.18909e-15	Tumor	AC010343.3
	1.54867e-19	2.44131	0.028	0.013	4.61427e-15	Tumor	DCC
	1.61251e-19	2.54747	0.026	0.011	4.80447e-15	Tumor	PTPRN
	1.80442e-19	3.04309	0.014	0.004	5.37627e-15	Tumor	CCNJL
	2.01347e-19	2.50819	0.016	0.005	5.99914e-15	Tumor	2024-03-01
	2.33998e-19	2.77454	0.024	0.01	6.97197e-15	Tumor	A2ML1-AS1
	3.25896e-19	2.37614	0.025	0.011	9.71008e-15	Tumor	MELTF-AS1
	3.46258e-19	2.91029	0.013	0.003	1.03167e-14	Tumor	AC008591.1
	3.57533e-19	3.35138	0.01	0.001	1.06527e-14	Tumor	AL591686.2
	3.57958e-19	2.5393	0.021	0.008	1.06654e-14	Tumor	ASPN
	4.71366e-19	2.22247	0.013	0.003	1.40443e-14	Tumor	RAET1E
	5.4688e-19	2.00084	0.058	0.036	1.62943e-14	Tumor	MEIS3
	7.12891e-19	2.26603	0.01	0.001	2.12406e-14	Tumor	EFNB3
	7.17402e-19	2.73833	0.019	0.007	2.1375e-14	Tumor	AC053513.1
	7.93779e-19	3.92069	0.012	0.002	2.36506e-14	Tumor	AC246817.2
	8.08173e-19	3.14095	0.013	0.003	2.40795e-14	Tumor	LINC02015
	9.76404e-19	2.73565	0.015	0.004	2.9092e-14	Tumor	AJ009632.2
	1.00959e-18	2.07049	0.017	0.005	3.00806e-14	Tumor	CXCL10
	1.05705e-18	2.55081	0.022	0.009	3.14949e-14	Tumor	CCDC36
	1.11719e-18	3.9713	0.01	0.002	3.32866e-14	Tumor	ADRB1
	1.61269e-18	2.75735	0.01	0.002	4.80501e-14	Tumor	AC024560.5
	1.72391e-18	2.83368	0.014	0.003	5.13638e-14	Tumor	AL049569.1
	1.75942e-18	2.42485	0.033	0.017	5.2422e-14	Tumor	AEBP1
	1.90186e-18	3.48969	0.018	0.006	5.66661e-14	Tumor	SLC29A4
	1.9776e-18	3.27052	0.011	0.002	5.89226e-14	Tumor	AP001628.1
	1.99209e-18	2.47292	0.01	0.002	5.93544e-14	Tumor	AC026341.1
	2.11799e-18	2.20567	0.022	0.009	6.31054e-14	Tumor	LINC01252
	2.44921e-18	3.00032	0.017	0.005	7.29741e-14	Tumor	AC090912.1
	2.64773e-18	2.02014	0.064	0.041	7.88892e-14	Tumor	AC087286.2
	3.00768e-18	3.65445	0.015	0.004	8.96139e-14	Tumor	SLC26A7
	3.08493e-18	2.06677	0.02	0.008	9.19155e-14	Tumor	RGS6
[truncated: 4,170 more rows]

## Sheet: Table S2
Table S2. List of top markers of different T cells subpopulation
	p_val	avg_log2FC	pct.1	pct.2	p_val_adj	cluster	gene
	2.68E-127	4390013691	336	0.48	8.00E-123	CD8	LINC00486
	3.44E-122	4697648961	325	47	1.03E-117	CD8	XIST
	4.22E-105	3167119787	0.29	43	1.26E-100	CD8	AC105402.3
	3.51E-93	4725401638	353	82	1.05E-88	CD8	CD8B
	1.39E-86	4920909748	378	101	4.15E-82	CD8	CD8A
	2.99E-84	2509186695	243	38	8.90E-80	CD8	AP001011.1
	3.47E-84	3325080969	269	0.05	1.04E-79	CD8	AC008014.1
	2.74E-68	2907506539	305	84	8.18E-64	CD8	ARL17B
	1.29E-67	3308034444	342	109	3.84E-63	CD8	AMBRA1
	3.41E-67	3238123924	297	81	1.02E-62	CD8	SNTB1
	1.35E-65	3406544211	308	0.09	4.03E-61	CD8	XKR6
	1.34E-64	3151786813	0.31	91	4.00E-60	CD8	ATP10A
	1.41E-63	50682229	733	568	4.19E-59	CD8	THEMIS
	1.06E-59	3765955531	318	106	3.16E-55	CD8	ARL15
	1.07E-59	4512185407	364	0.14	3.18E-55	CD8	NELL2
	4.08E-59	5761517779	483	254	1.22E-54	CD8	AOAH
	1.48E-58	3257615482	279	82	4.40E-54	CD8	BTBD9
	4.18E-56	2804199638	292	92	1.25E-51	CD8	PATJ
	2.02E-55	5602505978	453	241	6.01E-51	CD8	DPYD
	2.16E-55	5865690353	406	0.19	6.43E-51	CD8	BACH2
	1.93E-54	4150658499	489	255	5.76E-50	CD8	SAMD3
	3.82E-53	4346307234	505	294	1.14E-48	CD8	ZFAND3
	1.00E-51	4116437065	578	379	2.98E-47	CD8	PRKCQ
	2.52E-51	5358302727	719	602	7.52E-47	CD8	ARHGAP15
	5.41E-50	3822503169	473	262	1.61E-45	CD8	ATP8A1
	6.58E-48	2739736989	284	98	1.96E-43	CD8	IMMP2L
	3.63E-47	4368941154	507	0.31	1.08E-42	CD8	PITPNC1
	5.55E-47	3761516812	499	293	1.65E-42	CD8	MED13L
	8.83E-47	3869173667	455	248	2.63E-42	CD8	VPS13B
	1.32E-46	3667822495	462	259	3.92E-42	CD8	FAM172A
	1.38E-46	3893965176	385	0.18	4.10E-42	CD8	LEF1
	1.92E-46	3246821798	329	136	5.72E-42	CD8	FBXL17
	7.39E-46	3463496962	385	187	2.20E-41	CD8	FAF1
	1.27E-45	2695340693	337	136	3.78E-41	CD8	SCML4
	1.86E-45	3526168386	473	0.27	5.53E-41	CD8	PLCL2
	2.63E-45	3634042552	353	158	7.83E-41	CD8	SFMBT2
	7.53E-45	2956608291	384	175	2.24E-40	CD8	FCHSD2
	1.50E-44	2765926256	288	106	4.46E-40	CD8	SUMF1
	2.30E-44	2767730279	918	0.9	6.85E-40	CD8	MBNL1
	1.86E-43	2802961095	349	154	5.55E-39	CD8	PIK3R5
	2.46E-43	3754148068	718	594	7.34E-39	CD8	STAT4
	6.56E-43	3116061829	0.84	752	1.95E-38	CD8	CAMK4
	1.33E-42	3808608782	0.56	378	3.97E-38	CD8	GRAP2
	3.00E-42	4169934833	0.69	586	8.95E-38	CD8	DOCK10
	3.57E-42	3721991783	375	187	1.06E-37	CD8	CDKAL1
	4.40E-42	2675447925	338	143	1.31E-37	CD8	TNFSF8
	9.13E-42	3214355065	464	266	2.72E-37	CD8	KDM4C
	1.17E-41	3017167258	381	189	3.49E-37	CD8	ACYP2
	1.42E-41	3209611559	437	246	4.22E-37	CD8	CLASP1
	1.51E-41	2581377681	256	0.09	4.50E-37	CD8	CAMKMT
	1.20E-40	3450266112	441	245	3.58E-36	CD8	KDM6A
	1.43E-40	2983055522	303	127	4.27E-36	CD8	BCAS3
	2.16E-40	3204914971	367	178	6.43E-36	CD8	SPIDR
	4.77E-40	-3358096957	435	697	1.42E-35	CD8	TNFRSF4
	8.13E-40	3509968392	759	685	2.42E-35	CD8	ANKRD44
	1.10E-39	3608129871	682	561	3.27E-35	CD8	PARP8
	1.75E-39	3617284275	672	0.53	5.22E-35	CD8	PRKCH
	1.92E-39	3429875527	369	186	5.73E-35	CD8	MCTP2
	2.26E-39	395164137	662	535	6.73E-35	CD8	CBLB
	2.82E-39	3819579872	595	451	8.42E-35	CD8	FOXN3
	3.74E-39	3691708499	558	388	1.11E-34	CD8	STAG1
	4.08E-39	3502801585	622	471	1.22E-34	CD8	PCNX1
	4.98E-39	319553233	615	438	1.48E-34	CD8	SLFN12L
	5.92E-39	4041532662	592	427	1.76E-34	CD8	ZBTB20
	6.44E-39	2999520988	316	0.14	1.92E-34	CD8	GAB2
	1.08E-38	2718522445	266	104	3.22E-34	CD8	EXT1
	1.37E-38	3523055347	468	291	4.08E-34	CD8	OXNAD1
	3.96E-38	3087606358	0.65	498	1.18E-33	CD8	ITK
	3.98E-38	3818123241	348	174	1.19E-33	CD8	SMYD3
	4.66E-38	3446811737	423	244	1.39E-33	CD8	COP1
	6.27E-38	2657820168	303	129	1.87E-33	CD8	BTBD11
	1.76E-37	3451850817	0.35	173	5.24E-33	CD8	MAML3
	1.30E-36	2784091934	0.39	191	3.88E-32	CD8	CTSW
	1.64E-36	3596564565	732	659	4.90E-32	CD8	SOS1
	2.17E-36	3179414178	0.88	847	6.45E-32	CD8	PDE3B
	3.32E-36	4138535787	467	306	9.89E-32	CD8	MAML2
	7.35E-36	3124031063	467	286	2.19E-31	CD8	USP25
	7.49E-36	3150864005	451	271	2.23E-31	CD8	ARHGEF3
	8.22E-36	3241073549	584	421	2.45E-31	CD8	ITPR2
	9.12E-36	3479970834	468	299	2.72E-31	CD8	ZCCHC7
	1.46E-35	3441802882	411	237	4.36E-31	CD8	CASK
	1.51E-35	3034891416	344	168	4.48E-31	CD8	ITGA1
	2.04E-35	2751176009	0.4	0.22	6.09E-31	CD8	MGAT5
	2.40E-35	3588525306	564	415	7.14E-31	CD8	PRKCA
	3.24E-35	3350657185	584	439	9.66E-31	CD8	SSH2
	4.78E-35	3518427929	569	414	1.42E-30	CD8	TBC1D5
	6.12E-35	2738192653	395	216	1.82E-30	CD8	WDR7
	8.28E-35	2781971469	688	575	2.47E-30	CD8	PIP4K2A
	8.34E-35	346453336	493	334	2.48E-30	CD8	PCNX2
	1.04E-34	-2816086326	0.65	859	3.09E-30	CD8	MAF
	1.05E-34	5062686883	626	489	3.14E-30	CD8	CCL5
	1.20E-34	3309430219	474	303	3.59E-30	CD8	EXOC4
	1.35E-34	2739412219	375	202	4.01E-30	CD8	WDR70
	1.70E-34	2686471346	243	95	5.07E-30	CD8	WWOX
	2.39E-34	3732256365	431	264	7.13E-30	CD8	LINC01934
	2.43E-34	3569034037	493	335	7.23E-30	CD8	KLF12
	3.48E-34	2807409083	333	162	1.04E-29	CD8	FAM69A
	3.81E-34	2917237359	703	581	1.13E-29	CD8	FTX
	6.56E-34	3094529065	818	789	1.96E-29	CD8	SKAP1
	7.52E-34	-3179231743	611	0.91	2.24E-29	CD8	RPS4Y1
	1.78E-33	2735268159	366	194	5.30E-29	CD8	RRAS2
	5.32E-33	2606499386	751	686	1.59E-28	CD8	KANSL1
	6.14E-33	4191354252	595	476	1.83E-28	CD8	FUT8
	7.47E-33	3514411786	552	416	2.23E-28	CD8	CHST11
	2.22E-32	2782962843	522	361	6.61E-28	CD8	PPP1R16B
	6.32E-32	3228652059	508	358	1.88E-27	CD8	SIK3
	8.40E-32	3447683124	459	309	2.50E-27	CD8	PAN3
	1.11E-31	4028798091	446	282	3.31E-27	CD8	NKG7
	1.98E-31	-2563335481	458	698	5.91E-27	CD8	CD4
	2.02E-31	285427081	778	722	6.02E-27	CD8	RABGAP1L
	2.39E-31	2510683635	323	163	7.13E-27	CD8	STXBP5
	4.14E-31	3768912547	563	438	1.23E-26	CD8	AC016831.7
	5.54E-31	3495105123	454	311	1.65E-26	CD8	SUPT3H
	5.59E-31	2540975853	347	184	1.66E-26	CD8	ARHGAP26
	6.92E-31	2947345259	714	615	2.06E-26	CD8	GNG2
	1.47E-30	297220974	605	493	4.39E-26	CD8	PICALM
	3.50E-30	3178653402	0.65	552	1.04E-25	CD8	PDE7A
	4.37E-30	2536782347	365	0.2	1.30E-25	CD8	LMBR1
	6.83E-30	3065536828	459	302	2.04E-25	CD8	TCF12
	9.39E-30	3694575532	664	569	2.80E-25	CD8	BCL2
	9.46E-30	-2633087503	467	668	2.82E-25	CD8	CTSH
	1.03E-29	2687088414	522	364	3.08E-25	CD8	STIM1
	1.09E-29	3527965722	558	429	3.25E-25	CD8	MLLT3
	2.91E-29	2519015616	272	126	8.68E-25	CD8	RAD51B
	2.93E-29	3117286108	601	482	8.72E-25	CD8	ZEB1
	3.43E-29	3094304054	651	544	1.02E-24	CD8	ADK
	4.09E-29	2931971672	484	328	1.22E-24	CD8	VTI1A
	6.95E-29	3321793961	479	342	2.07E-24	CD8	PCED1B
	1.33E-28	2793815103	454	299	3.97E-24	CD8	ST6GAL1
	1.35E-28	3183835863	522	381	4.01E-24	CD8	INPP4B
	4.60E-28	2675532693	574	428	1.37E-23	CD8	PRKCB
	5.90E-28	2729361352	675	582	1.76E-23	CD8	CCSER2
	6.13E-28	3140643751	497	0.36	1.83E-23	CD8	FBXW7
	6.43E-28	260671322	541	0.4	1.92E-23	CD8	PPP6R3
	6.79E-28	2672906952	714	615	2.02E-23	CD8	ATXN1
	7.70E-28	2722429568	445	294	2.30E-23	CD8	ZNF609
	8.24E-28	2568988258	636	515	2.45E-23	CD8	DOCK2
	2.76E-27	2930393803	0.46	314	8.23E-23	CD8	RFX7
	2.92E-27	2642965335	453	0.31	8.71E-23	CD8	ITCH
	4.13E-27	2749322443	526	381	1.23E-22	CD8	VPS8
	8.97E-27	-2553137195	513	0.69	2.67E-22	CD8	TNFRSF18
	9.33E-27	3167734431	0.56	448	2.78E-22	CD8	LRBA
	1.36E-26	2854785888	548	432	4.05E-22	CD8	CEP85L
	3.96E-26	2609343143	369	219	1.18E-21	CD8	DLEU2
	5.08E-26	3802112758	392	254	1.51E-21	CD8	ATP8B4
	5.99E-26	2792375148	497	359	1.79E-21	CD8	NCOA2
	7.08E-26	2981447221	505	384	2.11E-21	CD8	ELMO1
	7.26E-26	250961156	613	495	2.16E-21	CD8	ANKRD17
	1.04E-25	2538318357	0.57	447	3.09E-21	CD8	TTC17
	1.05E-25	2612321528	447	295	3.13E-21	CD8	OSBPL3
	3.86E-25	2730290171	503	0.37	1.15E-20	CD8	BABAM2
	9.83E-25	2692665994	416	273	2.93E-20	CD8	MAP3K5
	1.32E-24	2907029434	513	393	3.92E-20	CD8	PACS1
	1.39E-24	2881542878	399	256	4.14E-20	CD8	TXK
	1.45E-24	2743880256	535	408	4.31E-20	CD8	LPP
	1.77E-24	290344257	565	452	5.26E-20	CD8	RASA2
	1.81E-24	3111033953	414	278	5.39E-20	CD8	NCALD
	2.24E-24	300120224	546	422	6.69E-20	CD8	MBD5
	2.33E-24	2761347303	0.47	335	6.94E-20	CD8	NSMCE2
	3.15E-24	3396947457	458	338	9.37E-20	CD8	PVT1
	4.28E-24	31408394	476	364	1.28E-19	CD8	PTPRJ
	4.32E-24	2567786626	613	478	1.29E-19	CD8	CDC14A
	4.36E-24	2674192753	485	354	1.30E-19	CD8	FBXO11
	6.00E-24	2517137589	629	528	1.79E-19	CD8	TNIK
	6.33E-24	3444835688	644	579	1.89E-19	CD8	SIPA1L1
	7.52E-24	2538733704	554	431	2.24E-19	CD8	HERC1
	2.01E-23	2700734355	509	386	5.99E-19	CD8	CDK17
	2.58E-23	253116708	0.44	302	7.70E-19	CD8	DENND4A
	2.73E-23	2678505118	392	261	8.14E-19	CD8	CARD11
	5.13E-23	2559136173	554	432	1.53E-18	CD8	CCDC91
	9.06E-23	2593607039	416	286	2.70E-18	CD8	SMURF2
	4.95E-22	2642852727	435	0.31	1.48E-17	CD8	ITFG1
	1.22E-21	255132428	503	387	3.64E-17	CD8	CAMK2D
	1.33E-21	2513123063	465	338	3.95E-17	CD8	NFKB1
	3.98E-19	2652960474	564	469	1.19E-14	CD8	ASCC3
	4.19E-19	-2684721974	482	635	1.25E-14	CD8	KLRB1
	7.16E-19	2615364808	0.38	257	2.13E-14	CD8	CD38
	4.88E-18	-3284433113	213	501	1.45E-13	CD4	CTLA4
	2.01E-16	-2902497551	217	506	6.00E-12	CD4	ICOS
	3.84E-16	-4691653159	376	615	1.14E-11	CD4	GZMB
	1.96E-15	-3076863687	605	808	5.85E-11	CD4	SKAP1
	7.56E-14	2544838279	205	77	2.25E-09	CD4	IFIT1
	1.58E-13	-2588063718	167	402	4.70E-09	CD4	PTPRJ
	6.74E-13	-2660942823	93	305	2.01E-08	CD4	VPS13B
	1.55E-12	-2642889107	85	296	4.60E-08	CD4	CD38
	1.69E-12	-2537927544	372	617	5.02E-08	CD4	CCSER2
	4.51E-12	-5012447718	341	0.53	1.34E-07	CD4	CCL5
	3.11E-11	-2532541746	174	384	9.25E-07	CD4	PCED1B
	7.62E-11	-3167132082	136	328	2.27E-06	CD4	NKG7
	7.89E-11	-2598229508	159	364	2.35E-06	CD4	PITPNC1
	9.51E-11	-2793210647	0.19	397	2.83E-06	CD4	IL2RA
	3.09E-10	-256385004	368	573	9.20E-06	CD4	PRKCH
	7.05E-10	-2726824222	473	683	2.10E-05	CD4	LINC01871
	3.15E-09	-3164678604	85	246	9.37E-05	CD4	BACH2
	6.58E-09	-2631352289	399	616	1961609796	CD4	THEMIS
	6.46E-07	-2615862991	171	311	1924324494	CD4	AOAH
	6.71E-05	-2657390277	333	466	1	CD4	GNLY
	0	1233958041	985	17	0	Prolif_T	UBE2C
	0	1193447219	985	23	0	Prolif_T	BIRC5
	0	1134728161	0.97	21	0	Prolif_T	RRM2
	0	1089883983	985	16	0	Prolif_T	DLGAP5
	0	1048576806	0.97	23	0	Prolif_T	GTSE1
	0	987461563	0.94	22	0	Prolif_T	HMMR
	0	9446521128	866	0.01	0	Prolif_T	HIST1H3G
	0	8707135372	761	11	0	Prolif_T	HIST1H3B
	0	8471266379	0.97	23	0	Prolif_T	AURKB
	0	8370529635	0.97	21	0	Prolif_T	KIF15
	0	795719588	925	19	0	Prolif_T	KIF14
	0	7190348835	881	12	0	Prolif_T	CDCA3
	0	7031130516	836	15	0	Prolif_T	CDC20
	0	6940186963	0.91	13	0	Prolif_T	SPC25
	0	6929384987	896	14	0	Prolif_T	HJURP
	0	6874633017	851	17	0	Prolif_T	CDCA5
	0	6515320873	851	19	0	Prolif_T	DIAPH3
	0	5667335709	821	14	0	Prolif_T	ANLN
	0	5324435265	881	16	0	Prolif_T	TROAP
	0	5276282706	761	8	0	Prolif_T	NEK2
	0	5020757096	881	13	0	Prolif_T	PBK
	0	4726255836	746	12	0	Prolif_T	SKA1
	0	349137393	701	4	0	Prolif_T	KIF20A
	1.73E-303	390126263	597	7	5.17E-299	Prolif_T	HIST1H3C
	1.75E-301	6935760699	881	23	5.20E-297	Prolif_T	MYBL2
	3.38E-299	8725017537	955	29	1.01E-294	Prolif_T	CKAP2L
	4.65E-295	4429442709	731	14	1.39E-290	Prolif_T	PKMYT1
	9.34E-295	6463187167	776	17	2.78E-290	Prolif_T	PLK1
	1.02E-282	7302408496	955	31	3.05E-278	Prolif_T	CDCA2
	2.35E-280	7253648764	0.94	0.03	7.00E-276	Prolif_T	SHCBP1
	5.93E-280	803511613	881	26	1.77E-275	Prolif_T	ESCO2
	2.32E-277	9527692162	0.91	29	6.92E-273	Prolif_T	CCNB2
	1.36E-274	5711689181	836	22	4.05E-270	Prolif_T	POLQ
	2.14E-271	2922019898	567	8	6.36E-267	Prolif_T	CDC25C
	2.20E-267	5854647949	627	11	6.54E-263	Prolif_T	HIST1H2AJ
	1.04E-264	5254647741	701	15	3.10E-260	Prolif_T	DEPDC1
	3.42E-261	4767030561	672	14	1.02E-256	Prolif_T	HIST1H3F
	2.15E-259	5404716627	806	22	6.40E-255	Prolif_T	SPC24
	6.94E-257	68047908	0.94	34	2.07E-252	Prolif_T	ASF1B
	4.83E-251	7840219562	0.94	35	1.44E-246	Prolif_T	CDCA8
	1.90E-249	2903590857	597	0.01	5.65E-245	Prolif_T	KIF18B
	1.09E-244	9483535735	0.94	37	3.25E-240	Prolif_T	TK1
	6.45E-244	4782530953	687	16	1.92E-239	Prolif_T	E2F8
	1.05E-240	5728689459	806	25	3.14E-236	Prolif_T	TTK
	3.66E-240	4067777108	746	0.02	1.09E-235	Prolif_T	SKA3
	2.04E-239	5418083089	851	29	6.09E-235	Prolif_T	CIT
	3.99E-237	6987248065	866	31	1.19E-232	Prolif_T	CENPA
	5.73E-235	9153205887	1	46	1.71E-230	Prolif_T	ZWINT
	1.27E-234	4422408939	776	23	3.77E-230	Prolif_T	DEPDC1B
	2.47E-227	8174403388	0.97	44	7.37E-223	Prolif_T	KIF23
	5.98E-226	9367506691	821	0.03	1.78E-221	Prolif_T	HIST1H2AL
	6.99E-226	3200263049	746	22	2.08E-221	Prolif_T	TRIP13
	1.16E-220	3838176503	657	17	3.45E-216	Prolif_T	DSCC1
	1.31E-220	6420109304	881	35	3.91E-216	Prolif_T	MXD3
	1.26E-218	6082023976	866	34	3.75E-214	Prolif_T	RAD51AP1
	1.79E-218	7013031191	0.94	43	5.34E-214	Prolif_T	KIFC1
	1.18E-216	3940421512	672	18	3.52E-212	Prolif_T	CDC45
	3.98E-215	705190195	881	37	1.19E-210	Prolif_T	CDT1
	8.99E-211	8978122769	0.94	46	2.68E-206	Prolif_T	CCNA2
	2.27E-210	4891996849	672	19	6.75E-206	Prolif_T	MCM10
	6.71E-206	9817175284	1	55	2.00E-201	Prolif_T	KNL1
	1.40E-203	1440258384	1	59	4.17E-199	Prolif_T	ASPM
	2.44E-202	4964625639	821	33	7.27E-198	Prolif_T	GGH
	6.08E-202	4389330604	746	27	1.81E-197	Prolif_T	MND1
	5.29E-199	654193557	866	39	1.58E-194	Prolif_T	KIF4A
	6.27E-197	631596607	0.94	48	1.87E-192	Prolif_T	FOXM1
	5.30E-195	4096086705	776	31	1.58E-190	Prolif_T	SPAG5
	6.22E-193	7489179682	0.94	51	1.85E-188	Prolif_T	CENPW
	3.82E-186	4313435505	731	28	1.14E-181	Prolif_T	DTL
	1.13E-184	6640988271	746	31	3.37E-180	Prolif_T	HIST1H2AM
	5.37E-183	686932256	0.91	49	1.60E-178	Prolif_T	PRR11
	1.47E-181	1019199087	806	39	4.37E-177	Prolif_T	HIST1H2AH
	1.65E-178	8782847398	1	65	4.91E-174	Prolif_T	NCAPG
	1.78E-177	8116853582	985	63	5.29E-173	Prolif_T	KIF2C
	8.70E-176	3266807973	672	25	2.59E-171	Prolif_T	POC1A
	7.79E-170	1010327173	985	69	2.32E-165	Prolif_T	CEP55
	6.63E-163	5949593848	896	54	1.97E-158	Prolif_T	PRC1
	5.50E-162	2611337847	463	11	1.64E-157	Prolif_T	HIST1H2AI
	2.19E-161	4470483617	836	44	6.53E-157	Prolif_T	NEIL3
	1.51E-160	636046618	0.91	57	4.51E-156	Prolif_T	CENPH
	6.88E-160	1443882885	925	65	2.05E-155	Prolif_T	HIST1H1B
	2.89E-159	6362621459	0.94	61	8.61E-155	Prolif_T	SGO1
	2.15E-158	1344404873	985	79	6.41E-154	Prolif_T	TYMS
	1.33E-156	9136461127	0.94	68	3.97E-152	Prolif_T	CDKN3
	7.36E-155	5677808911	881	55	2.19E-150	Prolif_T	CENPN
	7.37E-155	5436893303	896	55	2.20E-150	Prolif_T	CCNF
	6.49E-154	6215604338	761	0.04	1.93E-149	Prolif_T	HIST1H2BH
	1.05E-153	2549513322	433	0.01	3.13E-149	Prolif_T	HIST2H2AB
	8.95E-153	5786383098	507	16	2.67E-148	Prolif_T	FAM111B
	1.06E-152	9986413718	0.91	67	3.17E-148	Prolif_T	CDK1
	2.75E-152	3381322674	701	33	8.21E-148	Prolif_T	MTFR2
	1.03E-151	523135761	866	53	3.07E-147	Prolif_T	INCENP
	3.40E-150	3010410801	672	0.03	1.01E-145	Prolif_T	GINS1
	3.77E-149	3670513844	701	34	1.12E-144	Prolif_T	RMI2
	5.95E-149	495992055	806	46	1.77E-144	Prolif_T	MELK
	2.24E-147	3418398861	716	35	6.68E-143	Prolif_T	PLK4
	4.51E-145	4642520152	761	42	1.34E-140	Prolif_T	STIL
	5.48E-144	12388654	1	91	1.63E-139	Prolif_T	PCLAF
	7.46E-144	3775774037	761	42	2.22E-139	Prolif_T	WDR34
	1.96E-143	8924935253	955	78	5.84E-139	Prolif_T	NUF2
	2.32E-141	4162593469	582	24	6.91E-137	Prolif_T	CDC6
	6.76E-140	3770601257	761	43	2.02E-135	Prolif_T	RCCD1
	2.05E-139	2815499044	537	0.02	6.10E-135	Prolif_T	FAM83D
	2.24E-135	805776144	851	63	6.68E-131	Prolif_T	HIST1H2AG
	3.81E-134	3743916288	627	0.03	1.14E-129	Prolif_T	UHRF1
	9.11E-134	3535500648	731	41	2.71E-129	Prolif_T	ZGRF1
	2.77E-133	1693198567	1	108	8.27E-129	Prolif_T	MKI67
	5.18E-130	3892744972	731	43	1.54E-125	Prolif_T	TCF19
	3.17E-129	2533344042	612	29	9.44E-125	Prolif_T	TMPO-AS1
	1.06E-123	8590809743	896	77	3.15E-119	Prolif_T	CCNB1
	2.51E-123	4389762378	836	61	7.48E-119	Prolif_T	CENPJ
	8.81E-123	9915883217	1	0.11	2.62E-118	Prolif_T	KIF11
	2.88E-121	9057270689	955	95	8.58E-117	Prolif_T	BRCA1
	4.60E-119	5604987347	821	63	1.37E-114	Prolif_T	C21orf58
	1.40E-118	581258176	0.91	79	4.18E-114	Prolif_T	CIP2A
	1.23E-117	689857374	896	79	3.66E-113	Prolif_T	BUB1
	4.45E-117	395111592	642	37	1.32E-112	Prolif_T	HIST1H2AK
	5.32E-117	3030228062	493	21	1.59E-112	Prolif_T	XRCC2
	1.87E-114	9122107807	1	109	5.58E-110	Prolif_T	CENPU
	3.48E-114	3126402037	612	34	1.04E-109	Prolif_T	ARHGEF39
	2.00E-113	1014705276	955	103	5.96E-109	Prolif_T	CENPE
	1.68E-112	5611367704	821	67	5.00E-108	Prolif_T	ORC6
	4.86E-112	3047094251	537	26	1.45E-107	Prolif_T	HIST1H3H
	1.88E-110	3910491446	731	52	5.62E-106	Prolif_T	TIMELESS
	3.52E-110	5104693167	0.91	83	1.05E-105	Prolif_T	FANCD2
	4.58E-109	254563016	627	37	1.37E-104	Prolif_T	OIP5
	3.66E-105	6986402778	0.94	0.1	1.09E-100	Prolif_T	HMGB3
	1.28E-104	5124633366	746	59	3.82E-100	Prolif_T	CCDC34
	1.79E-104	6504024652	851	81	5.33E-100	Prolif_T	BUB1B
	1.38E-102	7816907952	925	0.1	4.13E-98	Prolif_T	FEN1
	6.92E-102	951098499	0.91	101	2.06E-97	Prolif_T	CLSPN
	8.97E-102	325919634	672	46	2.67E-97	Prolif_T	GINS4
	1.64E-101	5021370096	866	81	4.88E-97	Prolif_T	SPDL1
	2.33E-100	8100160995	0.94	108	6.94E-96	Prolif_T	AURKA
	2.50E-100	4511217107	881	83	7.44E-96	Prolif_T	MIS18A
	2.03E-99	4392514422	776	65	6.05E-95	Prolif_T	KIF18A
	5.25E-99	4321991823	776	66	1.57E-94	Prolif_T	DSN1
	9.03E-99	1126524518	1	0.15	2.69E-94	Prolif_T	CKS1B
	3.23E-97	776717197	955	114	9.64E-93	Prolif_T	SGO2
	8.05E-95	720440831	985	124	2.40E-90	Prolif_T	UBE2T
	1.26E-94	6154962	881	94	3.74E-90	Prolif_T	CHEK1
	5.47E-94	4188506692	746	65	1.63E-89	Prolif_T	HIST1H2BC
	5.30E-93	4606890029	776	72	1.58E-88	Prolif_T	KNSTRN
	1.94E-90	3595451989	746	65	5.78E-86	Prolif_T	RFC3
	1.19E-89	1474444747	1	177	3.54E-85	Prolif_T	CENPF
	1.53E-89	7705484938	0.94	123	4.57E-85	Prolif_T	FANCI
	7.85E-89	4860252978	791	78	2.34E-84	Prolif_T	LIG1
	2.76E-88	1508176759	1	184	8.22E-84	Prolif_T	TOP2A
	2.85E-88	6938813974	896	106	8.50E-84	Prolif_T	MCM7
	3.57E-88	2682744774	537	34	1.06E-83	Prolif_T	ZNF367
	1.71E-87	4577683886	701	61	5.08E-83	Prolif_T	GINS2
	4.81E-87	8061364844	896	116	1.43E-82	Prolif_T	FBXO5
	8.43E-87	3706469815	791	77	2.51E-82	Prolif_T	RFC5
	5.24E-86	5587655305	881	102	1.56E-81	Prolif_T	RACGAP1
	9.93E-86	4775857722	672	59	2.96E-81	Prolif_T	HIST1H2BF
	3.75E-85	1217361678	1	186	1.12E-80	Prolif_T	TPX2
	5.92E-83	4403319948	716	68	1.76E-78	Prolif_T	CDKN2C
	3.10E-82	422253799	821	88	9.23E-78	Prolif_T	KNTC1
	3.83E-81	4436524337	0.91	107	1.14E-76	Prolif_T	CENPL
	1.14E-80	3375835813	642	55	3.40E-76	Prolif_T	DNA2
	1.38E-78	2887339831	627	53	4.10E-74	Prolif_T	HIST1H4H
	7.02E-78	6169039621	925	124	2.09E-73	Prolif_T	HIRIP3
	1.14E-77	2981773947	657	59	3.40E-73	Prolif_T	TEDC1
	5.38E-77	6554256266	925	127	1.60E-72	Prolif_T	ATAD5
	2.99E-76	7738845828	955	147	8.92E-72	Prolif_T	BRCA2
	7.50E-75	5696158969	836	106	2.23E-70	Prolif_T	MCM5
	2.06E-73	2818824426	731	75	6.15E-69	Prolif_T	PXMP2
	1.81E-72	277093147	552	45	5.40E-68	Prolif_T	MCM2
	6.48E-72	5755282781	955	137	1.93E-67	Prolif_T	NCAPH
	5.44E-69	1559469535	1	0.27	1.62E-64	Prolif_T	STMN1
	8.91E-69	3157664976	627	61	2.66E-64	Prolif_T	MCM8
	1.59E-68	1234208808	1	255	4.73E-64	Prolif_T	NUSAP1
	1.70E-68	3443695573	716	79	5.06E-64	Prolif_T	GEN1
	8.28E-68	5702073971	925	139	2.47E-63	Prolif_T	NCAPG2
	2.17E-67	1013067472	1	243	6.48E-63	Prolif_T	SMC2
	4.94E-66	2963354869	701	77	1.47E-61	Prolif_T	PARPBP
	6.62E-66	3318395277	746	87	1.97E-61	Prolif_T	NCAPH2
	2.38E-65	9247964882	985	222	7.10E-61	Prolif_T	H2AFX
	1.22E-64	5949436586	0.91	146	3.65E-60	Prolif_T	ARHGAP11A
	3.97E-63	2544394008	493	41	1.18E-58	Prolif_T	E2F2
	1.05E-62	4745102114	716	0.09	3.12E-58	Prolif_T	HIST1H4E
	1.46E-62	6497493637	0.97	0.18	4.34E-58	Prolif_T	KIF22
	4.56E-62	2502850202	522	47	1.36E-57	Prolif_T	CXXC5
	2.19E-61	3067448925	597	61	6.52E-57	Prolif_T	CENPQ
	4.77E-61	377881013	836	117	1.42E-56	Prolif_T	C19orf48
	5.28E-61	7757680615	985	0.21	1.57E-56	Prolif_T	CENPM
	1.45E-60	7466777521	1	225	4.33E-56	Prolif_T	DTYMK
	1.90E-58	2653074645	657	76	5.67E-54	Prolif_T	ZWILCH
	2.75E-57	4380526861	821	122	8.20E-53	Prolif_T	CHAF1A
	3.88E-57	3698755204	776	106	1.16E-52	Prolif_T	HAUS8
	5.06E-57	5373817161	0.91	155	1.51E-52	Prolif_T	ECT2
	6.75E-57	4069523095	836	127	2.01E-52	Prolif_T	TUBG1
	2.34E-56	6181743502	866	157	6.97E-52	Prolif_T	SNRNP25
	3.99E-56	4430282041	776	113	1.19E-51	Prolif_T	CTNNAL1
	4.66E-56	7475403974	985	227	1.39E-51	Prolif_T	NDC80
	2.04E-55	5229382849	687	94	6.09E-51	Prolif_T	HIST1H1A
	7.85E-55	7080369939	0.94	197	2.34E-50	Prolif_T	DHFR
	1.69E-54	3855496879	746	107	5.05E-50	Prolif_T	MASTL
	1.85E-54	3954835753	866	136	5.52E-50	Prolif_T	IFI27L1
	2.21E-54	2563308379	597	68	6.58E-50	Prolif_T	FANCG
	7.14E-54	2765935243	507	51	2.13E-49	Prolif_T	E2F1
	4.69E-53	2694214092	746	101	1.40E-48	Prolif_T	NRM
	1.18E-52	6553480686	0.97	212	3.51E-48	Prolif_T	NCAPD3
	1.82E-52	7159750921	955	221	5.41E-48	Prolif_T	TMEM106C
	2.90E-52	7146350018	1	263	8.65E-48	Prolif_T	MAD2L1
	1.04E-50	5232102498	955	191	3.09E-46	Prolif_T	NCAPD2
	4.02E-50	6006645578	896	175	1.20E-45	Prolif_T	TOX2
	4.05E-50	3258537642	746	0.11	1.21E-45	Prolif_T	FANCA
	1.59E-49	3101302409	836	132	4.73E-45	Prolif_T	CEP57L1
	1.77E-49	1413870929	1	505	5.27E-45	Prolif_T	TUBA1B
	2.17E-49	4916561681	791	135	6.46E-45	Prolif_T	SAC3D1
	2.30E-49	3186417163	627	83	6.86E-45	Prolif_T	MYO7A
	2.78E-49	3294764049	701	101	8.27E-45	Prolif_T	WDHD1
	1.72E-48	3100751957	642	86	5.13E-44	Prolif_T	BRIP1
	3.08E-48	4370999966	761	125	9.16E-44	Prolif_T	WDR76
	4.09E-48	2716976927	657	0.09	1.22E-43	Prolif_T	ACOT7
	1.09E-47	7532851983	985	307	3.24E-43	Prolif_T	LMNB1
	2.12E-47	6459790082	896	0.19	6.32E-43	Prolif_T	MCM4
	3.84E-47	4118452723	925	171	1.15E-42	Prolif_T	C9orf40
	7.93E-47	4069714793	836	147	2.36E-42	Prolif_T	ITGB3BP
	1.11E-46	3703205416	716	115	3.32E-42	Prolif_T	SCCPDH
	1.18E-45	4048549575	866	0.16	3.52E-41	Prolif_T	BCL2L12
	3.03E-45	1100412866	1	0.72	9.03E-41	Prolif_T	HMGB2
	4.90E-45	1130289143	1	621	1.46E-40	Prolif_T	TUBB
	5.60E-45	3722543332	0.91	171	1.67E-40	Prolif_T	EMC9
	1.63E-44	9071536738	1	485	4.86E-40	Prolif_T	SMC4
	1.68E-44	3440057661	731	118	5.00E-40	Prolif_T	EPB41L2
	3.61E-44	2984915541	731	117	1.07E-39	Prolif_T	HIST1H2BN
	1.52E-43	4130504955	866	165	4.53E-39	Prolif_T	CCDC18
	3.39E-43	7098927825	985	286	1.01E-38	Prolif_T	EZH2
	3.51E-43	445078762	806	152	1.05E-38	Prolif_T	RFC4
	5.74E-43	4254907859	821	155	1.71E-38	Prolif_T	PRIM1
	6.12E-43	4527797939	1	986	1.82E-38	Prolif_T	HMGB1
	1.04E-42	8789632953	1	447	3.10E-38	Prolif_T	UBE2S
	1.89E-42	9873705893	1	451	5.63E-38	Prolif_T	TUBB4B
	2.96E-42	2586528997	716	112	8.82E-38	Prolif_T	CEP128
	4.26E-42	8445229235	1	608	1.27E-37	Prolif_T	TMPO
	6.37E-42	4223375212	866	175	1.90E-37	Prolif_T	MTHFD1
	9.62E-42	8285918001	985	312	2.87E-37	Prolif_T	ATAD2
	1.54E-41	3461624953	582	84	4.58E-37	Prolif_T	CD83
	1.93E-41	6327027895	1	928	5.74E-37	Prolif_T	H2AFZ
	2.20E-41	8256320098	1	417	6.56E-37	Prolif_T	CKS2
	8.10E-41	846814716	1	673	2.41E-36	Prolif_T	HMGN2
	8.39E-41	4293691281	851	172	2.50E-36	Prolif_T	LRR1
	1.63E-40	8247010756	1	416	4.85E-36	Prolif_T	PTTG1
	3.23E-40	7802943584	985	329	9.63E-36	Prolif_T	TUBA1C
	3.39E-40	6688012096	1	328	1.01E-35	Prolif_T	NUDT1
	3.54E-40	6364632591	1	306	1.06E-35	Prolif_T	TACC3
	3.66E-40	7908940895	0.97	339	1.09E-35	Prolif_T	KPNA2
	9.81E-40	334691934	836	157	2.92E-35	Prolif_T	SASS6
	1.52E-39	2651563889	597	89	4.52E-35	Prolif_T	PHGDH
	1.82E-39	2942191064	806	148	5.42E-35	Prolif_T	UBL7-AS1
	2.15E-39	6291999686	955	293	6.41E-35	Prolif_T	PHF19
	2.37E-39	2770868762	761	134	7.06E-35	Prolif_T	ODF2
	2.68E-39	3065915289	761	137	7.98E-35	Prolif_T	BRI3BP
	7.95E-39	7263898788	1	388	2.37E-34	Prolif_T	CBX5
	1.28E-38	3756118467	851	169	3.82E-34	Prolif_T	GPSM2
	1.61E-38	1329123393	1	642	4.80E-34	Prolif_T	HIST1H4C
	4.40E-38	288544603	746	132	1.31E-33	Prolif_T	RPL39L
	5.61E-37	3917069757	1	974	1.67E-32	Prolif_T	HNRNPA2B1
	7.36E-37	2791841937	418	51	2.19E-32	Prolif_T	ENPP1
	1.17E-36	412272188	896	0.2	3.49E-32	Prolif_T	CDCA4
	1.22E-36	3699328939	791	0.16	3.63E-32	Prolif_T	MYB
	2.58E-36	4351767441	851	193	7.68E-32	Prolif_T	ALYREF
	2.63E-36	2845508685	672	118	7.84E-32	Prolif_T	DDX11
	7.19E-36	6380589187	1	754	2.14E-31	Prolif_T	ANP32E
	8.04E-36	2919144558	716	132	2.40E-31	Prolif_T	MAP3K20
	1.28E-35	2643205845	612	103	3.82E-31	Prolif_T	CAMK1
	2.36E-35	7022425304	985	401	7.03E-31	Prolif_T	SMC1A
	4.22E-35	2993149097	1	987	1.26E-30	Prolif_T	ACTB
	1.11E-34	8751884915	985	536	3.30E-30	Prolif_T	DUT
	1.83E-34	26290308	1	987	5.45E-30	Prolif_T	PTMA
	2.95E-34	6459356779	1	356	8.80E-30	Prolif_T	DNAJC9
	3.03E-34	2733957839	552	88	9.04E-30	Prolif_T	CAVIN3
	3.73E-34	2686044871	478	69	1.11E-29	Prolif_T	LINC01281
	7.07E-34	4745971057	1	905	2.11E-29	Prolif_T	RAN
	8.18E-34	4706856335	0.91	225	2.44E-29	Prolif_T	CEP152
	8.38E-34	5318889412	0.94	264	2.50E-29	Prolif_T	GMNN
	1.82E-33	5125636114	836	205	5.42E-29	Prolif_T	NBL1
	3.48E-33	2994726563	761	155	1.04E-28	Prolif_T	AL441992.1
	5.59E-33	2974886824	716	142	1.67E-28	Prolif_T	HADH
	8.64E-33	3743235654	881	208	2.57E-28	Prolif_T	TRIOBP
	1.10E-32	36786129	851	193	3.29E-28	Prolif_T	WEE1
	1.50E-31	3558965326	746	162	4.47E-27	Prolif_T	RFC2
	1.81E-31	6215871022	955	309	5.40E-27	Prolif_T	MCM3
	2.23E-31	5238011702	1	0.84	6.64E-27	Prolif_T	H2AFV
	3.02E-31	3880228868	806	0.19	9.01E-27	Prolif_T	PCNT
	3.04E-31	3557486342	746	162	9.05E-27	Prolif_T	MT1E
	4.49E-31	7256515976	985	443	1.34E-26	Prolif_T	KIF20B
	1.45E-30	5132844164	0.94	292	4.33E-26	Prolif_T	CKAP5
	1.54E-30	508619686	925	282	4.59E-26	Prolif_T	TTF2
	1.68E-30	5234689526	985	311	5.02E-26	Prolif_T	CENPK
	2.77E-30	5259611754	0.94	303	8.25E-26	Prolif_T	DDX39A
	3.47E-30	8955871341	1	648	1.03E-25	Prolif_T	MT2A
	9.16E-30	3853409957	896	0.22	2.73E-25	Prolif_T	CEP78
	1.27E-29	6251014295	985	435	3.78E-25	Prolif_T	FAM111A
	1.88E-29	2982539752	791	178	5.59E-25	Prolif_T	COPRS
	2.53E-29	7523150989	0.94	366	7.53E-25	Prolif_T	PCNA
	3.26E-29	5570818439	1	436	9.71E-25	Prolif_T	LSM5
	4.48E-29	425722534	955	271	1.34E-24	Prolif_T	SAE1
	4.59E-29	5790056711	925	326	1.37E-24	Prolif_T	RRM1
	8.11E-29	3040388534	1	974	2.42E-24	Prolif_T	PFN1
	1.13E-28	3762786867	1	914	3.37E-24	Prolif_T	COX8A
	1.98E-28	3906348618	1	933	5.89E-24	Prolif_T	DEK
	2.43E-28	3488354523	791	194	7.25E-24	Prolif_T	MSH2
	6.89E-28	3163631163	716	164	2.05E-23	Prolif_T	RFWD3
	8.52E-28	3808272502	1	929	2.54E-23	Prolif_T	ANP32B
	1.29E-27	4795220857	0.97	306	3.84E-23	Prolif_T	TOPBP1
	1.37E-27	2680775341	1	983	4.08E-23	Prolif_T	GAPDH
	1.76E-27	3220960461	582	118	5.26E-23	Prolif_T	PIF1
	2.44E-27	4213139845	1	897	7.26E-23	Prolif_T	NUCKS1
	4.41E-27	4421497968	0.97	297	1.31E-22	Prolif_T	VRK1
	5.12E-27	6172608418	0.97	363	1.53E-22	Prolif_T	FABP5
	6.37E-27	591713447	985	0.46	1.90E-22	Prolif_T	CKAP2
	6.70E-27	5715389776	1	406	2.00E-22	Prolif_T	SMS
	7.21E-27	2556893417	627	132	2.15E-22	Prolif_T	SAMD1
	7.66E-27	8422262123	925	448	2.28E-22	Prolif_T	HIST2H2AC
	1.28E-26	288853407	731	169	3.81E-22	Prolif_T	MYEF2
	1.45E-26	4488008221	1	894	4.33E-22	Prolif_T	TPI1
	1.56E-26	8543477723	1	0.65	4.66E-22	Prolif_T	HIST1H1C
	1.60E-26	3592109636	851	226	4.76E-22	Prolif_T	RAD51C
	1.81E-26	2957313207	761	0.18	5.39E-22	Prolif_T	AC084033.3
	2.12E-26	3402431735	687	159	6.33E-22	Prolif_T	IL26
	4.40E-26	252504215	746	174	1.31E-21	Prolif_T	ALDH3A2
	8.32E-26	3398005861	746	187	2.48E-21	Prolif_T	RBBP8
	9.03E-26	4021223386	806	216	2.69E-21	Prolif_T	CDCA7
	9.55E-26	485186982	0.97	349	2.84E-21	Prolif_T	SSRP1
	1.13E-25	3594651615	1	928	3.37E-21	Prolif_T	HNRNPA3
	1.24E-25	446255319	866	267	3.70E-21	Prolif_T	ACAT2
	1.31E-25	5473991397	1	588	3.90E-21	Prolif_T	RPA3
	1.47E-25	2586377787	597	126	4.38E-21	Prolif_T	AL031777.3
	2.98E-25	2514708867	806	196	8.87E-21	Prolif_T	SNRPA
	3.27E-25	3462000082	761	195	9.75E-21	Prolif_T	FGFR1
	3.61E-25	5606512869	851	289	1.08E-20	Prolif_T	HELLS
	3.79E-25	2891133841	731	179	1.13E-20	Prolif_T	ICMT
	6.72E-25	3126117127	836	216	2.00E-20	Prolif_T	CTNNA1
	6.91E-25	4382080151	1	866	2.06E-20	Prolif_T	RAD21
	7.66E-25	5207845302	1	0.61	2.28E-20	Prolif_T	ANAPC11
	8.82E-25	4371769674	0.91	289	2.63E-20	Prolif_T	YEATS4
	1.14E-24	6545462558	925	0.38	3.39E-20	Prolif_T	PTMS
	1.83E-24	6196625548	985	464	5.45E-20	Prolif_T	DNMT1
	1.87E-24	8350676318	0.94	604	5.56E-20	Prolif_T	HIST1H1E
	1.97E-24	4506195561	955	328	5.87E-20	Prolif_T	EXOSC8
	3.19E-24	2682143115	866	225	9.49E-20	Prolif_T	SLC25A1
	3.38E-24	4614522148	0.94	313	1.01E-19	Prolif_T	NSD2
	4.34E-24	2673139645	731	177	1.29E-19	Prolif_T	CSE1L
	5.38E-24	3365040472	731	192	1.60E-19	Prolif_T	PAICS
	5.38E-24	3583892454	896	0.26	1.60E-19	Prolif_T	TEX30
	5.66E-24	3864577993	851	254	1.69E-19	Prolif_T	KMT5A
	6.85E-24	320019134	866	241	2.04E-19	Prolif_T	TRIM28
	6.89E-24	5223978898	985	487	2.05E-19	Prolif_T	SKA2
	7.33E-24	5020783894	1	794	2.18E-19	Prolif_T	PKM
	8.10E-24	-6182116187	0.97	975	2.41E-19	Prolif_T	TXNIP
	8.45E-24	3284619512	1	973	2.52E-19	Prolif_T	ACTG1
	8.47E-24	3560105163	716	0.19	2.52E-19	Prolif_T	POLD3
	8.75E-24	3177982576	881	243	2.61E-19	Prolif_T	NUP107
	1.00E-23	4682518309	776	227	2.98E-19	Prolif_T	GOLIM4
	1.66E-23	3204491669	0.91	256	4.94E-19	Prolif_T	GPAA1
	2.14E-23	2718818315	881	237	6.37E-19	Prolif_T	MMS22L
	2.69E-23	5940843206	0.97	421	8.03E-19	Prolif_T	NUCB2
	4.25E-23	5163424434	1	659	1.27E-18	Prolif_T	CARHSP1
	5.20E-23	2940732871	866	237	1.55E-18	Prolif_T	ECI1
	5.38E-23	2654136921	1	982	1.60E-18	Prolif_T	HSP90AA1
	8.76E-23	3928537024	0.91	298	2.61E-18	Prolif_T	PRPSAP1
	9.16E-23	258877248	1	968	2.73E-18	Prolif_T	PPIA
	9.16E-23	4236536402	0.94	316	2.73E-18	Prolif_T	TFDP1
	1.20E-22	3865535546	955	307	3.56E-18	Prolif_T	AKR7A2
	1.22E-22	5645214902	1	659	3.63E-18	Prolif_T	HNRNPAB
	1.30E-22	3640886759	1	879	3.88E-18	Prolif_T	HMGN1
	1.47E-22	2744517373	881	0.24	4.37E-18	Prolif_T	DLEU2
	1.57E-22	4683524034	1	679	4.68E-18	Prolif_T	H2AFY
	1.68E-22	4654391911	955	411	5.02E-18	Prolif_T	ZDHHC12
	2.16E-22	4339793343	925	317	6.45E-18	Prolif_T	BARD1
	2.30E-22	4574164893	1	803	6.84E-18	Prolif_T	SLC25A5
	2.57E-22	3524375333	731	197	7.65E-18	Prolif_T	MTSS1
	3.26E-22	4740483686	1	514	9.70E-18	Prolif_T	LSM3
	3.51E-22	3459167908	761	217	1.05E-17	Prolif_T	CEP295
	4.46E-22	4393862431	1	785	1.33E-17	Prolif_T	SNRPB
	4.93E-22	4739697892	1	549	1.47E-17	Prolif_T	ILF2
	5.19E-22	2960449812	716	189	1.55E-17	Prolif_T	ACYP1
	5.64E-22	5228516486	0.97	446	1.68E-17	Prolif_T	CRIP1
	5.89E-22	4424040723	1	787	1.75E-17	Prolif_T	SRSF3
	6.06E-22	3140073156	836	242	1.80E-17	Prolif_T	POP7
	7.55E-22	5682363436	896	321	2.25E-17	Prolif_T	HSPB1
	8.79E-22	5237001378	418	0.08	2.62E-17	Prolif_T	CCL4
	1.24E-21	2682962777	746	196	3.69E-17	Prolif_T	FAH
	1.39E-21	4626493403	1	755	4.16E-17	Prolif_T	SFPQ
	1.78E-21	3010839689	851	243	5.32E-17	Prolif_T	MAD2L2
	1.91E-21	4724031746	985	534	5.68E-17	Prolif_T	BANF1
	2.01E-21	300364058	701	0.19	5.99E-17	Prolif_T	CBR3
	2.38E-21	4775836504	1	562	7.09E-17	Prolif_T	LSM4
	2.51E-21	4432216665	567	145	7.47E-17	Prolif_T	LAYN
	2.82E-21	3556071545	0.94	296	8.41E-17	Prolif_T	ACTL6A
	2.91E-21	2916298445	821	231	8.68E-17	Prolif_T	SHMT2
	4.05E-21	-3698517113	985	961	1.21E-16	Prolif_T	N4BP2L2
	4.17E-21	2688595805	672	171	1.24E-16	Prolif_T	CD109
	4.37E-21	3397652328	955	296	1.30E-16	Prolif_T	HMGXB4
	5.10E-21	4116083065	1	773	1.52E-16	Prolif_T	MRPL51
	5.32E-21	3812253068	955	0.32	1.59E-16	Prolif_T	CDK5RAP2
	5.85E-21	2859134937	791	217	1.74E-16	Prolif_T	IMPDH2
	5.89E-21	4868406826	925	344	1.75E-16	Prolif_T	SQLE
	6.05E-21	3483813257	881	273	1.80E-16	Prolif_T	NUP37
	8.43E-21	2527355898	537	122	2.51E-16	Prolif_T	F5
	8.99E-21	2575284623	1	964	2.68E-16	Prolif_T	YBX1
	1.10E-20	3221154553	821	242	3.28E-16	Prolif_T	RBL1
	1.22E-20	2646439396	791	222	3.64E-16	Prolif_T	MRPL37
	1.24E-20	4188793088	1	859	3.69E-16	Prolif_T	TPM4
	1.33E-20	5829818784	851	324	3.97E-16	Prolif_T	LAG3
	1.44E-20	3836288999	746	234	4.28E-16	Prolif_T	ASB2
	1.46E-20	3346949786	866	0.27	4.35E-16	Prolif_T	RANGAP1
	1.98E-20	2720251294	567	138	5.89E-16	Prolif_T	C9orf3
	2.04E-20	5348315706	985	616	6.09E-16	Prolif_T	RANBP1
	2.47E-20	4868256582	985	488	7.35E-16	Prolif_T	USP1
	3.03E-20	3420284956	821	253	9.04E-16	Prolif_T	GGCT
	5.18E-20	4422306728	1	722	1.54E-15	Prolif_T	BUB3
	5.40E-20	4480256914	1	0.44	1.61E-15	Prolif_T	CCDC167
	5.90E-20	4180895506	955	361	1.76E-15	Prolif_T	MZT1
	8.02E-20	-2543234676	1	982	2.39E-15	Prolif_T	FTL
	8.52E-20	455611525	985	702	2.54E-15	Prolif_T	SRSF2
	1.02E-19	3088050558	821	0.25	3.05E-15	Prolif_T	HLTF
	1.08E-19	389303022	0.94	342	3.23E-15	Prolif_T	COMMD4
	1.10E-19	690976992	0.94	747	3.26E-15	Prolif_T	HIST1H1D
	1.57E-19	4834746192	985	0.63	4.68E-15	Prolif_T	SIVA1
	1.86E-19	2656070485	851	249	5.54E-15	Prolif_T	ELOVL1
	2.05E-19	3243336107	1	929	6.10E-15	Prolif_T	ENO1
	2.39E-19	3939538703	925	339	7.11E-15	Prolif_T	HAT1
	2.40E-19	5583101033	836	344	7.15E-15	Prolif_T	DUSP4
	2.56E-19	3902465795	896	324	7.64E-15	Prolif_T	CBX1
	3.93E-19	5323983084	955	406	1.17E-14	Prolif_T	ENTPD1
	4.05E-19	4430508371	1	756	1.21E-14	Prolif_T	PDIA6
	4.08E-19	3288315154	0.94	314	1.22E-14	Prolif_T	MAZ
	4.23E-19	2503858461	881	258	1.26E-14	Prolif_T	KHSRP
	4.79E-19	4363159394	985	777	1.43E-14	Prolif_T	PGAM1
	6.13E-19	3134524659	1	932	1.83E-14	Prolif_T	UBB
	7.79E-19	364815061	851	294	2.32E-14	Prolif_T	CENPX
	9.50E-19	4374155581	1	653	2.83E-14	Prolif_T	HNRNPM
	9.70E-19	4465088336	0.94	411	2.89E-14	Prolif_T	IDH2
	1.37E-18	4548278877	985	511	4.08E-14	Prolif_T	FDPS
	2.15E-18	3710329207	1	878	6.41E-14	Prolif_T	LDHA
	2.39E-18	4145837554	0.97	398	7.11E-14	Prolif_T	DBF4
	2.82E-18	304633334	761	239	8.39E-14	Prolif_T	SRRT
	2.82E-18	2976874578	896	285	8.40E-14	Prolif_T	ANAPC15
	2.83E-18	3634356772	0.94	0.35	8.44E-14	Prolif_T	MRPL27
	2.97E-18	4407906731	0.97	0.65	8.85E-14	Prolif_T	SNRPD1
	3.06E-18	421691382	985	457	9.11E-14	Prolif_T	PSMC3
	3.36E-18	2791205906	881	276	1.00E-13	Prolif_T	CCDC14
	3.49E-18	4356203551	0.97	455	1.04E-13	Prolif_T	EBP
	3.55E-18	5317758895	1	643	1.06E-13	Prolif_T	ARL6IP1
	4.02E-18	2714957013	1	941	1.20E-13	Prolif_T	SET
	4.15E-18	487161841	985	682	1.24E-13	Prolif_T	NASP
	4.81E-18	3009846797	627	179	1.43E-13	Prolif_T	NCR3
	5.01E-18	3136108597	925	311	1.49E-13	Prolif_T	ARMC1
	5.14E-18	438037289	955	482	1.53E-13	Prolif_T	HDGF
	9.04E-18	3968914144	582	165	2.69E-13	Prolif_T	RGS16
	1.04E-17	3312298135	1	888	3.09E-13	Prolif_T	HNRNPA1
	1.37E-17	-3067228744	1	986	4.08E-13	Prolif_T	BTG1
	1.42E-17	3978314471	866	328	4.24E-13	Prolif_T	SLC1A4
	1.43E-17	4355335513	1	504	4.26E-13	Prolif_T	RBBP7
	1.45E-17	3445803852	821	287	4.33E-13	Prolif_T	PSMB10
	1.54E-17	3313037493	1	902	4.60E-13	Prolif_T	IFI16
	1.56E-17	3413581895	896	307	4.63E-13	Prolif_T	BOLA3
	1.88E-17	3183064127	881	303	5.59E-13	Prolif_T	DCXR
	2.60E-17	374262234	0.94	354	7.73E-13	Prolif_T	TIMM10
	4.11E-17	3259302381	0.91	327	1.23E-12	Prolif_T	TPRKB
	4.90E-17	262450385	791	247	1.46E-12	Prolif_T	NABP2
	6.48E-17	3961026041	1	771	1.93E-12	Prolif_T	YWHAH
	7.55E-17	2887798954	701	217	2.25E-12	Prolif_T	SIRPG
	7.90E-17	3333987546	821	273	2.35E-12	Prolif_T	CD38
	1.13E-16	347095451	1	814	3.37E-12	Prolif_T	CBX3
	1.69E-16	3017178164	1	908	5.03E-12	Prolif_T	MZT2B
	1.81E-16	302674457	0.94	325	5.39E-12	Prolif_T	GUSB
	1.83E-16	2611607648	821	262	5.45E-12	Prolif_T	CDK4
	1.85E-16	3542449571	836	317	5.51E-12	Prolif_T	OXCT1
	2.15E-16	4172521894	1	632	6.40E-12	Prolif_T	NAA38
	2.54E-16	4040006473	0.97	758	7.57E-12	Prolif_T	ARPC1B
	2.65E-16	330665562	0.94	346	7.91E-12	Prolif_T	RRP7A
	3.11E-16	4161089267	0.94	476	9.25E-12	Prolif_T	RPS17
	3.35E-16	2832667493	896	298	9.97E-12	Prolif_T	POLE4
	3.35E-16	3949722716	1	648	9.99E-12	Prolif_T	NONO
	3.71E-16	3495009941	1	823	1.11E-11	Prolif_T	CALM3
	4.37E-16	-2828020621	1	966	1.30E-11	Prolif_T	STK4
	4.54E-16	4050874546	1	646	1.35E-11	Prolif_T	VDAC3
	5.15E-16	2788399574	1	937	1.53E-11	Prolif_T	NAP1L1
	5.59E-16	3287970345	806	291	1.67E-11	Prolif_T	BRD8
	6.65E-16	3047121339	851	304	1.98E-11	Prolif_T	RCC2
	7.16E-16	4019371644	1	817	2.13E-11	Prolif_T	CALR
	8.37E-16	3635964496	0.91	384	2.50E-11	Prolif_T	PGP
	9.66E-16	3508264969	1	818	2.88E-11	Prolif_T	SRSF7
	1.11E-15	2991786524	851	301	3.30E-11	Prolif_T	TOMM5
	1.22E-15	3584836148	1	828	3.63E-11	Prolif_T	HP1BP3
	1.46E-15	3813093654	806	296	4.34E-11	Prolif_T	RDH10
	1.70E-15	4049681685	1	723	5.06E-11	Prolif_T	PRKDC
	1.75E-15	4279048065	1	529	5.21E-11	Prolif_T	CNTRL
	2.15E-15	4143429067	642	217	6.41E-11	Prolif_T	CSF1
	2.18E-15	-3879798131	955	928	6.50E-11	Prolif_T	EML4
	2.61E-15	3630369058	1	715	7.78E-11	Prolif_T	BLOC1S1
	2.70E-15	2798785619	1	969	8.05E-11	Prolif_T	VIM
	2.73E-15	3563653159	985	419	8.15E-11	Prolif_T	HPRT1
	2.91E-15	2672305446	1	935	8.68E-11	Prolif_T	CALM2
	2.97E-15	-8320243552	701	833	8.85E-11	Prolif_T	IL7R
	3.20E-15	3995623225	985	504	9.55E-11	Prolif_T	RNASEH2C
	3.34E-15	3088850088	776	275	9.95E-11	Prolif_T	VDR
	3.63E-15	3312128779	1	0.84	1.08E-10	Prolif_T	DBI
	3.66E-15	2519150604	851	283	1.09E-10	Prolif_T	PSMA6
	4.48E-15	3639537101	1	717	1.34E-10	Prolif_T	SNRPF
	4.52E-15	3520516298	1	781	1.35E-10	Prolif_T	HNRNPR
	5.08E-15	3940422741	0.97	518	1.51E-10	Prolif_T	XPO1
	5.08E-15	3060643354	925	342	1.51E-10	Prolif_T	WBP4
	5.15E-15	-3756567638	0.97	925	1.53E-10	Prolif_T	PNRC1
	6.36E-15	3026604267	1	884	1.89E-10	Prolif_T	SNRPG
	7.37E-15	2602236105	851	0.29	2.19E-10	Prolif_T	MCMBP
	7.39E-15	3951537516	269	0.05	2.20E-10	Prolif_T	CCL3
	8.01E-15	-2617225279	1	981	2.39E-10	Prolif_T	IL32
	9.11E-15	486653219	776	327	2.71E-10	Prolif_T	TIGIT
	1.12E-14	3562056348	746	272	3.32E-10	Prolif_T	PPFIBP1
	1.18E-14	2867204794	866	312	3.53E-10	Prolif_T	SPATS2L
	1.22E-14	3271595105	0.97	393	3.63E-10	Prolif_T	MPHOSPH9
	1.36E-14	3511282577	925	361	4.06E-10	Prolif_T	NME1
	1.41E-14	4054099272	1	684	4.20E-10	Prolif_T	SUPT16H
	1.60E-14	3800907731	821	337	4.78E-10	Prolif_T	MCM6
	1.61E-14	2998592012	0.91	351	4.79E-10	Prolif_T	PMF1
	1.68E-14	2532407771	851	293	4.99E-10	Prolif_T	TRNAU1AP
	2.26E-14	3726729105	985	713	6.72E-10	Prolif_T	SRSF10
	2.57E-14	330716113	1	846	7.65E-10	Prolif_T	PA2G4
	2.68E-14	4177245508	985	708	8.00E-10	Prolif_T	MT-ND6
	2.80E-14	2645896668	761	261	8.33E-10	Prolif_T	SLC27A2
	2.81E-14	3933704871	985	506	8.38E-10	Prolif_T	FUBP1
	3.04E-14	3200767205	955	378	9.05E-10	Prolif_T	AHCYL1
	3.70E-14	4024601347	0.94	463	1.10E-09	Prolif_T	UBALD2
	3.90E-14	3041264302	925	353	1.16E-09	Prolif_T	HAUS1
	4.03E-14	2788943922	806	0.29	1.20E-09	Prolif_T	PLPP1
	4.16E-14	3749990757	1	502	1.24E-09	Prolif_T	PRDX3
	4.63E-14	2870795446	642	212	1.38E-09	Prolif_T	IL4I1
	4.68E-14	2521175824	896	314	1.39E-09	Prolif_T	IFNAR2
	4.84E-14	2734015582	0.91	0.33	1.44E-09	Prolif_T	AP1S2
	5.15E-14	2735748761	925	332	1.53E-09	Prolif_T	TMED8
	5.63E-14	3996418465	985	642	1.68E-09	Prolif_T	SUZ12
	5.75E-14	4790351095	851	376	1.71E-09	Prolif_T	IL2RA
	6.00E-14	3715110756	1	832	1.79E-09	Prolif_T	JPT1
	6.11E-14	2757907591	851	315	1.82E-09	Prolif_T	CHTOP
	6.56E-14	4253454966	0.94	462	1.95E-09	Prolif_T	IKZF3
	6.71E-14	3624721968	0.94	457	2.00E-09	Prolif_T	UQCC2
	7.19E-14	3940548187	0.91	445	2.14E-09	Prolif_T	LIMA1
	9.67E-14	2534577913	866	306	2.88E-09	Prolif_T	CHRAC1
	9.98E-14	4397441639	866	556	2.97E-09	Prolif_T	MIF
	1.07E-13	3470445381	1	643	3.20E-09	Prolif_T	AP2S1
	1.19E-13	3069315879	925	368	3.55E-09	Prolif_T	COX20
	1.20E-13	2654211241	866	318	3.58E-09	Prolif_T	POLR3K
	2.10E-13	3275933844	0.91	384	6.27E-09	Prolif_T	MEA1
	2.16E-13	3556740854	0.97	655	6.43E-09	Prolif_T	YWHAE
	2.19E-13	2924893007	881	338	6.52E-09	Prolif_T	CDC25B
	2.68E-13	2596597136	896	333	7.98E-09	Prolif_T	MTHFD2
	2.80E-13	2797143236	925	358	8.33E-09	Prolif_T	VKORC1
	3.30E-13	3485693418	985	719	9.85E-09	Prolif_T	UQCRQ
	3.55E-13	-5283808168	791	837	1.06E-08	Prolif_T	GIMAP4
	4.93E-13	-5366529667	896	0.85	1.47E-08	Prolif_T	GIMAP7
	7.19E-13	3293983938	0.94	407	2.14E-08	Prolif_T	POLE3
	7.58E-13	2507722439	776	0.28	2.26E-08	Prolif_T	KIF21A
	7.70E-13	3156095613	1	843	2.29E-08	Prolif_T	PPDPF
	7.77E-13	2787357036	836	317	2.31E-08	Prolif_T	BMI1
	8.26E-13	2811341739	791	289	2.46E-08	Prolif_T	SMOX
	1.22E-12	2981277926	896	367	3.64E-08	Prolif_T	SZRD1
	1.40E-12	2879819497	1	838	4.18E-08	Prolif_T	ATP5MF
	1.42E-12	304606168	0.94	388	4.24E-08	Prolif_T	CYC1
	1.75E-12	3242208608	0.94	413	5.22E-08	Prolif_T	POLR2A
	1.78E-12	3661780101	1	618	5.30E-08	Prolif_T	SNRPE
	1.98E-12	3113146075	1	755	5.90E-08	Prolif_T	TALDO1
	2.26E-12	380648239	0.97	661	6.74E-08	Prolif_T	TUBA4A
	2.52E-12	2923986032	0.94	389	7.52E-08	Prolif_T	SLC25A11
	2.81E-12	-3242809101	985	884	8.37E-08	Prolif_T	EIF4A2
	3.04E-12	3663913166	0.94	0.49	9.07E-08	Prolif_T	RNASEH2B
	3.16E-12	3399823093	1	695	9.41E-08	Prolif_T	ETFB
	3.22E-12	3469526823	1	593	9.60E-08	Prolif_T	NDUFA13
	3.59E-12	3376332238	985	686	1.07E-07	Prolif_T	YWHAQ
	3.66E-12	2517854369	866	0.33	1.09E-07	Prolif_T	DKC1
	4.36E-12	3247473362	1	717	1.30E-07	Prolif_T	PSMB2
	4.64E-12	-3139162057	955	951	1.38E-07	Prolif_T	GPR171
	4.81E-12	3110474584	925	418	1.43E-07	Prolif_T	RABL6
	5.04E-12	3512426307	0.97	0.54	1.50E-07	Prolif_T	HSPB11
	5.08E-12	2780450855	0.97	393	1.51E-07	Prolif_T	VBP1
	5.20E-12	3407150847	985	519	1.55E-07	Prolif_T	PSMD2
	6.54E-12	3474202398	0.91	472	1.95E-07	Prolif_T	ACADVL
	7.49E-12	303818144	881	394	2.23E-07	Prolif_T	DAZAP1
	7.53E-12	2614711637	881	0.35	2.24E-07	Prolif_T	MRPL11
	7.96E-12	2802806941	0.91	361	2.37E-07	Prolif_T	IKBIP
	8.62E-12	2989025671	1	826	2.57E-07	Prolif_T	ATP5IF1
	9.57E-12	2792267322	866	357	2.85E-07	Prolif_T	SMARCB1
	1.01E-11	3340488005	955	489	3.02E-07	Prolif_T	PSMD14
	1.03E-11	3104623779	0.97	426	3.08E-07	Prolif_T	EIF4A3
	1.13E-11	3626781023	1	608	3.38E-07	Prolif_T	BAZ1B
	1.17E-11	3413422977	1	775	3.48E-07	Prolif_T	SMC3
	1.18E-11	2500499905	955	365	3.51E-07	Prolif_T	PTBP1
	1.21E-11	3589739614	0.94	443	3.60E-07	Prolif_T	AHI1
	1.23E-11	3172041055	955	442	3.67E-07	Prolif_T	FIBP
	1.25E-11	3384845379	985	603	3.73E-07	Prolif_T	VPS29
	1.37E-11	2839392878	1	845	4.10E-07	Prolif_T	HNRNPD
	1.51E-11	3268055451	985	706	4.50E-07	Prolif_T	VDAC1
	1.65E-11	-2552717682	1	939	4.91E-07	Prolif_T	LEPROTL1
	1.94E-11	2960264303	896	394	5.79E-07	Prolif_T	PMVK
	1.96E-11	3107503016	0.91	432	5.83E-07	Prolif_T	GMPS
	2.29E-11	3159206412	985	471	6.82E-07	Prolif_T	SNRPA1
	2.56E-11	4087949897	955	648	7.64E-07	Prolif_T	TNFRSF18
	2.64E-11	3119727279	0.97	438	7.85E-07	Prolif_T	ITGAE
	2.83E-11	349871109	896	419	8.42E-07	Prolif_T	ZEB2
	2.92E-11	3082048579	836	371	8.71E-07	Prolif_T	TRIM8
	3.02E-11	2897237021	866	374	8.99E-07	Prolif_T	NUP62
	3.65E-11	3372777657	1	752	1.09E-06	Prolif_T	MIS18BP1
	5.18E-11	3841341293	955	685	1.54E-06	Prolif_T	RBPJ
	5.42E-11	3143538478	1	0.75	1.62E-06	Prolif_T	CACYBP
	5.89E-11	3396921599	955	544	1.76E-06	Prolif_T	DCTN3
	6.14E-11	3252794379	1	539	1.83E-06	Prolif_T	GLRX5
	6.35E-11	2801178776	955	419	1.89E-06	Prolif_T	MGME1
	7.89E-11	3274024238	1	677	2.35E-06	Prolif_T	NDUFB1
	1.00E-10	3053542807	955	472	2.98E-06	Prolif_T	HNRNPL
	1.01E-10	-5835295304	687	784	3.00E-06	Prolif_T	TIMP1
	1.03E-10	3024972315	0.94	0.44	3.08E-06	Prolif_T	ADGRE5
	1.11E-10	3181756473	1	754	3.30E-06	Prolif_T	GSTO1
	1.11E-10	2714417076	1	835	3.31E-06	Prolif_T	PPP1CA
	1.12E-10	-5226808089	761	749	3.32E-06	Prolif_T	RIPOR2
	1.16E-10	3141560771	1	704	3.46E-06	Prolif_T	XRCC6
	1.21E-10	3256838422	0.97	561	3.61E-06	Prolif_T	LSM2
	1.31E-10	2973284223	985	754	3.91E-06	Prolif_T	SNRPD3
	1.33E-10	2512550918	1	896	3.97E-06	Prolif_T	HNRNPF
	1.49E-10	3382221706	985	672	4.43E-06	Prolif_T	COX17
	1.76E-10	3218843132	955	551	5.25E-06	Prolif_T	RBMX
	1.99E-10	2799495839	925	405	5.93E-06	Prolif_T	SNRNP40
	2.10E-10	2559377796	1	881	6.24E-06	Prolif_T	XRCC5
	2.29E-10	4067798206	925	621	6.82E-06	Prolif_T	CTSH
	2.34E-10	2953626787	1	785	6.97E-06	Prolif_T	PPM1G
	2.48E-10	3225369378	985	595	7.39E-06	Prolif_T	WDR1
	2.49E-10	3386434245	0.97	537	7.43E-06	Prolif_T	ILF3
	2.65E-10	3296645	955	557	7.88E-06	Prolif_T	CTSB
	2.74E-10	2877111273	0.97	442	8.15E-06	Prolif_T	CISD2
	2.80E-10	3016985176	955	458	8.33E-06	Prolif_T	RTN3
	2.81E-10	3105122592	955	537	8.36E-06	Prolif_T	SNRPC
	2.81E-10	-2851036376	985	906	8.38E-06	Prolif_T	RABAC1
	2.86E-10	3235130302	0.97	0.5	8.53E-06	Prolif_T	MT-ATP8
	3.01E-10	28833125	1	739	8.98E-06	Prolif_T	PSMB6
	3.03E-10	3272526962	0.94	521	9.02E-06	Prolif_T	TUBA1A
	3.34E-10	3266627789	1	679	9.96E-06	Prolif_T	EIF5A
	3.96E-10	5970253371	836	451	1.18E-05	Prolif_T	GNLY
	4.13E-10	283738706	0.94	441	1.23E-05	Prolif_T	NUDCD2
	4.41E-10	3063171749	1	735	1.31E-05	Prolif_T	LBR
	5.17E-10	3459027935	0.97	569	1.54E-05	Prolif_T	ARL3
	5.52E-10	2532667082	955	413	1.64E-05	Prolif_T	TPGS2
	5.70E-10	3357461386	0.94	575	1.70E-05	Prolif_T	CD82
	7.88E-10	3358052949	925	565	2.35E-05	Prolif_T	HDLBP
	8.19E-10	3032871185	985	0.53	2.44E-05	Prolif_T	ITGB1BP1
	8.19E-10	2847909549	955	457	2.44E-05	Prolif_T	MRPS16
	9.06E-10	2997051709	955	0.48	2.70E-05	Prolif_T	PDS5B
	9.11E-10	-2697424707	1	961	2.71E-05	Prolif_T	NEAT1
	1.01E-09	2691859888	955	435	3.01E-05	Prolif_T	NENF
	1.01E-09	3024268763	985	574	3.02E-05	Prolif_T	RALY
	1.08E-09	2564339836	1	838	3.22E-05	Prolif_T	COX5A
	1.10E-09	2509746398	1	856	3.27E-05	Prolif_T	GNG5
	1.23E-09	2836803072	985	768	3.68E-05	Prolif_T	POLR2L
	1.33E-09	3210131919	881	472	3.97E-05	Prolif_T	ATP5MC1
	1.59E-09	296895904	985	651	4.73E-05	Prolif_T	HNRNPH3
	1.85E-09	2893969585	1	791	5.52E-05	Prolif_T	PARP1
	1.94E-09	3134939169	0.97	608	5.77E-05	Prolif_T	GLO1
	2.18E-09	3406766683	881	476	6.49E-05	Prolif_T	PHLDA1
	2.30E-09	2631195886	896	405	6.87E-05	Prolif_T	NHP2
	2.64E-09	2789711441	1	747	7.86E-05	Prolif_T	ANP32A
	2.71E-09	2923948195	0.91	469	8.08E-05	Prolif_T	NOP56
	2.93E-09	311427516	0.97	0.51	8.74E-05	Prolif_T	PSMD1
	3.09E-09	2553552561	925	428	9.21E-05	Prolif_T	MRPL16
	3.95E-09	2871692582	0.97	704	1176681111	Prolif_T	HNRNPA0
	4.68E-09	2656576978	0.94	438	1393421109	Prolif_T	EIF4G1
	4.88E-09	255951293	0.94	0.41	1453878148	Prolif_T	TDG
	5.08E-09	2829606172	0.94	483	1514540746	Prolif_T	DHX9
	5.22E-09	3132563914	1	589	1555429435	Prolif_T	TAF15
	5.32E-09	2886406753	1	661	1583640239	Prolif_T	MDH1
	5.38E-09	3067372822	0.97	573	1602634899	Prolif_T	ACAA2
	7.46E-09	-2547690356	0.97	957	2222013166	Prolif_T	ZFP36L2
	7.82E-09	2956336132	985	563	233119972	Prolif_T	P4HB
	8.11E-09	2578808783	955	463	2415644772	Prolif_T	HINT2
	1.00E-08	2958346599	955	559	2988607577	Prolif_T	RECQL
	1.07E-08	2865553999	985	579	3185344902	Prolif_T	TMEM160
	1.14E-08	296373337	1	639	3408928059	Prolif_T	PAXX
	1.48E-08	2728274468	1	761	4398089577	Prolif_T	PSMA4
	1.52E-08	3158900009	866	473	4529524686	Prolif_T	SNX9
	1.58E-08	286453255	985	605	4721480259	Prolif_T	CTCF
	1.66E-08	2753382393	985	549	4949665987	Prolif_T	NUDT21
	1.69E-08	2583887218	925	439	5049553081	Prolif_T	HMGA1
	1.85E-08	2648287531	896	471	5509971478	Prolif_T	TADA3
	2.01E-08	2875510813	985	512	5982026394	Prolif_T	TIMM8B
	2.12E-08	3194891585	0.91	476	6304802049	Prolif_T	CTLA4
	2.24E-08	2703915144	985	715	6688552043	Prolif_T	SRP9
	2.49E-08	3143115406	0.97	735	7416625999	Prolif_T	JUND
	2.63E-08	2830625701	1	726	7835061117	Prolif_T	KPNB1
	2.67E-08	2582919405	1	0.76	7954900879	Prolif_T	KHDRBS1
	3.85E-08	2663927722	1	0.52	1147430209	Prolif_T	CCT7
	3.96E-08	2810529802	985	612	1180874149	Prolif_T	RHEB
	3.99E-08	2548835446	0.91	442	1190285979	Prolif_T	2024-09-11
	4.22E-08	3082053993	0.94	569	1257931118	Prolif_T	CD59
	4.28E-08	2638899636	1	678	1275400133	Prolif_T	ARPC4
	4.69E-08	2601212964	1	755	1396037798	Prolif_T	RBM8A
	4.73E-08	2644210406	0.91	482	1409749643	Prolif_T	NEK7
	4.95E-08	2710339324	0.94	0.52	1474337916	Prolif_T	TIPRL
	5.40E-08	2756009624	1	594	1608587934	Prolif_T	CMC2
	5.46E-08	275735564	0.97	563	1626937131	Prolif_T	NDUFAF3
	6.62E-08	2555902123	0.97	0.52	1973118912	Prolif_T	NUTF2
	6.93E-08	2522552205	1	746	206589918	Prolif_T	ATP5F1C
	7.13E-08	2781458894	0.91	561	2123733879	Prolif_T	STIP1
	7.30E-08	2754360872	0.97	604	2173698485	Prolif_T	ROMO1
	7.47E-08	2546260332	0.91	454	2224826282	Prolif_T	BLM
	7.55E-08	2952473313	985	725	2248444749	Prolif_T	HSPD1
	7.70E-08	2611306294	985	733	2293764892	Prolif_T	HADHA
	7.75E-08	3268912348	0.94	0.52	2310484059	Prolif_T	IFI6
	8.14E-08	-4178680081	791	751	2425044794	Prolif_T	ISG20
	8.35E-08	2734181931	1	659	2488698042	Prolif_T	VCP
	1.16E-07	267698362	1	708	346060076	Prolif_T	MRPL57
	1.16E-07	2566245309	0.97	509	3469972391	Prolif_T	SNRNP70
	1.27E-07	2572788217	955	529	3785452143	Prolif_T	WBP11
	1.44E-07	2583905187	0.94	551	4284212717	Prolif_T	KRTCAP2
	1.53E-07	2627662225	925	476	4562743469	Prolif_T	RHOC
	1.66E-07	2547080899	896	0.48	493294431	Prolif_T	RNF167
	1.75E-07	2786229281	0.94	494	5227505302	Prolif_T	PSMA2
	1.80E-07	2519616969	1	806	5364767747	Prolif_T	PSIP1
	1.83E-07	-4290118248	537	668	5453409297	Prolif_T	TC2N
	1.93E-07	-3190230075	881	0.8	5755484108	Prolif_T	ARID5B
	1.96E-07	2788375128	955	622	5830161957	Prolif_T	HTATSF1
	2.16E-07	2683336395	1	662	6444116778	Prolif_T	DDT
	2.51E-07	3457554849	985	634	7491215774	Prolif_T	SLA
	2.72E-07	2653504147	0.97	638	8104126356	Prolif_T	CDK2AP2
	3.14E-07	2870241541	1	643	9359110511	Prolif_T	COMMD3
	3.16E-07	2566493574	985	668	941978458	Prolif_T	RTN4
	3.19E-07	2721143723	955	618	9503575566	Prolif_T	TMEM167A
	3.50E-07	2736582993	1	0.61	1043991941	Prolif_T	CCT5
	4.16E-07	4190477472	0.91	594	1238902738	Prolif_T	GZMB
	5.16E-07	2638684356	1	657	1537490966	Prolif_T	FKBP1A
	5.42E-07	-3025909903	0.94	784	1616072621	Prolif_T	RNASET2
	6.14E-07	2503563296	955	532	1827980275	Prolif_T	MAP2K2
	6.25E-07	2583771311	1	795	1860802312	Prolif_T	BST2
	6.49E-07	2819847023	925	581	1932802465	Prolif_T	CTNNB1
	8.35E-07	2834494849	955	0.65	2488297981	Prolif_T	GSTP1
	8.51E-07	2564566731	1	781	2536511981	Prolif_T	H1FX
	8.66E-07	2554934476	1	866	2580234272	Prolif_T	CD74
	9.72E-07	-2549236659	955	796	2897356222	Prolif_T	MGAT4A
	1.03E-06	-3830432913	672	666	3083178188	Prolif_T	GIMAP1
	1.08E-06	2503425084	0.97	575	3230906069	Prolif_T	TRA2B
	1.11E-06	2559323724	985	647	3303145509	Prolif_T	RAB8A
	1.13E-06	2617224144	955	572	3351984458	Prolif_T	CCAR1
	1.16E-06	2544703735	0.94	563	3465693656	Prolif_T	SLIRP
	1.29E-06	261862323	0.97	652	3842274524	Prolif_T	MINOS1
	1.41E-06	2500787961	0.97	526	4202750528	Prolif_T	NUP50
	1.54E-06	2595829112	881	482	4575710645	Prolif_T	CDKN2D
	1.72E-06	2672738696	1	754	5130114639	Prolif_T	SH2D2A
	1.75E-06	2537162924	1	616	520310361	Prolif_T	ARPP19
	2.08E-06	2745368041	925	543	6187552181	Prolif_T	LYST
	2.18E-06	3152872571	896	693	6497712663	Prolif_T	HLA-DRB1
	2.82E-06	2539394761	0.91	0.55	8394614796	Prolif_T	UBTF
	3.83E-06	2566739363	955	647	1142160154	Prolif_T	MRPL52
	7.50E-06	2688389383	896	631	2233433373	Prolif_T	HLA-DPB1
	1.44E-05	2984416757	881	605	4303440042	Prolif_T	HLA-DRA
	1.63E-05	-2844101183	896	748	4862105203	Prolif_T	PAG1
	1.77E-05	-2695478468	776	728	5260408593	Prolif_T	TRAT1
	1.83E-05	3066933258	0.91	666	546407309	Prolif_T	LINC01871
	2.17E-05	-2721191766	776	696	645199348	Prolif_T	TRADD
	2.57E-05	-3388807235	627	613	7672055668	Prolif_T	CREBRF
	3.66E-05	-4017704779	716	624	1	Prolif_T	CD55
	4.35E-05	-2707426752	896	774	1	Prolif_T	IER2
	1052819108	-3691521174	552	692	1	Prolif_T	ANXA1
	109302889	-2855741007	866	691	1	Prolif_T	EPB41
	1651320899	-3128058334	194	367	1	Prolif_T	LY96
	1699198537	-2757352099	776	682	1	Prolif_T	ERN1
	1739165615	-2599432941	881	745	1	Prolif_T	UTRN
	1808248615	-3428732759	269	412	1	Prolif_T	MIAT
	2263912784	-3433872323	373	465	1	Prolif_T	S1PR1
	2683969878	-2913838493	612	591	1	Prolif_T	SLC2A3
	4116435955	-2741663275	657	608	1	Prolif_T	IL10RA
	5250808612	-2710695238	716	609	1	Prolif_T	PIK3IP1
	632534838	-2634429217	731	632	1	Prolif_T	FKBP11
	1379980594	-2583236095	104	259	1	Prolif_T	LINC00861
	1747017788	-2865626603	254	374	1	Prolif_T	KDM7A
	1772469787	-4050254741	776	599	1	Prolif_T	THEMIS
	2075204355	-3417159914	537	512	1	Prolif_T	SORL1
	2999079116	-2709323777	299	0.38	1	Prolif_T	SLC35D2
	3122252976	-3590092334	313	383	1	Prolif_T	GPR155
	3844924815	-2560582565	597	0.53	1	Prolif_T	TRAPPC6A
	4567362547	-3240728881	478	514	1	Prolif_T	KLF2
	8555538441	-2732616674	821	603	1	Prolif_T	FTX
	7.62E-136	5751504535	839	412	2.27E-131	Reg_T	CTLA4
	1.68E-91	590379145	679	325	5.01E-87	Reg_T	IL2RA
	6.74E-89	2832597455	368	82	2.01E-84	Reg_T	F5
	9.75E-74	2691688971	0.21	0.03	2.91E-69	Reg_T	ZBED2
	1.23E-64	4331876394	189	27	3.67E-60	Reg_T	CCL3
	3.36E-59	397791899	315	0.09	1.00E-54	Reg_T	CSF2
	1.47E-50	5684636426	231	57	4.38E-46	Reg_T	CCL4
	6.89E-48	4029634512	551	313	2.05E-43	Reg_T	DUSP4
	8.63E-48	3806427156	206	47	2.57E-43	Reg_T	IL17A
	2.59E-45	3583940013	512	264	7.72E-41	Reg_T	RDH10
	7.83E-44	-4272806017	692	859	2.33E-39	Reg_T	IL7R
	1.42E-43	281003142	938	791	4.23E-39	Reg_T	MAF
	2.51E-43	2955259962	721	442	7.49E-39	Reg_T	ICOS
	8.26E-41	2652782196	928	839	2.46E-36	Reg_T	CREM
	2.60E-39	3997045687	0.52	296	7.76E-35	Reg_T	LAG3
	6.83E-36	2519573403	893	778	2.04E-31	Reg_T	PKM
	1.51E-35	3017363163	664	447	4.49E-31	Reg_T	PHLDA1
	2.78E-35	2764627157	0.41	201	8.29E-31	Reg_T	GOLIM4
	1.86E-34	-3415373356	512	725	5.53E-30	Reg_T	ANXA1
	4.58E-34	3059614905	775	629	1.36E-29	Reg_T	TNFRSF18
	3.73E-33	3268947186	0.56	355	1.11E-28	Reg_T	PTMS
	4.24E-33	3311409738	512	299	1.26E-28	Reg_T	TIGIT
	3.35E-32	2567075618	628	418	9.99E-28	Reg_T	LIMA1
	5.33E-32	2973457486	638	448	1.59E-27	Reg_T	SNX9
	2.83E-30	3122241567	509	295	8.44E-26	Reg_T	HSPB1
	4.89E-29	3097910703	746	619	1.46E-24	Reg_T	SLA
	9.12E-28	-2789659655	0.68	763	2.72E-23	Reg_T	RIPOR2
	4.68E-27	2511014276	778	596	1.39E-22	Reg_T	CTSH
	1.78E-25	2626059891	456	261	5.29E-21	Reg_T	CCL20
	2.20E-24	-3404600735	508	682	6.55E-20	Reg_T	GZMA
	1.25E-22	2569940559	748	678	3.73E-18	Reg_T	RBPJ
	1.31E-22	2516959844	779	615	3.91E-18	Reg_T	TNFRSF4
	2.05E-22	-275259785	444	612	6.11E-18	Reg_T	CLIC3
	1.07E-21	-3763831473	168	328	3.19E-17	Reg_T	AOAH
	3.58E-21	-3355256915	541	615	1.07E-16	Reg_T	THEMIS
	6.54E-21	-2937799089	0.17	0.33	1.95E-16	Reg_T	SAMD3
	2.13E-19	-2553608303	29	0.16	6.35E-15	Reg_T	CD8B
	1.32E-15	2549842422	755	634	3.93E-11	Reg_T	MT2A
	6.33E-15	-2715729232	62	178	1.89E-10	Reg_T	CD8A
	4.70E-14	-4027188795	447	532	1.40E-09	Reg_T	CCL5
	6.37E-11	-2852946796	643	623	1.90E-06	Reg_T	ARHGAP15
	2.38E-37	-2999174042	305	478	7.08E-33	Stress_sig	IL2RA
	6.87E-27	-3072462698	43	137	2.05E-22	Stress_sig	CCL4

## Sheet: Table S3
Table S3. List of top markers of CD8 T cells in CART and MOCK group
	p_val	avg_log2FC	pct.1	pct.2	p_val_adj	cluster	gene
LINC00486	1.17E-129	-3774592072	92	966	3.48E-125	CART	LINC00486
AC105402.3	3.33E-118	-4218763255	63	876	9.92E-114	CART	AC105402.3
XIST	6.76E-111	-3322547651	99	0.91	2.01E-106	CART	XIST
BACH2	1.14E-102	-3081072469	191	962	3.41E-98	CART	BACH2
DPYD	6.60E-100	-2816879217	246	991	1.97E-95	CART	DPYD
ARL17B	1.22E-92	-3426223457	104	825	3.63E-88	CART	ARL17B
AC010894.3	1.42E-92	-3741298842	63	756	4.22E-88	CART	AC010894.3
AOAH	1.64E-90	-3117577011	304	949	4.87E-86	CART	AOAH
ARHGAP15	3.06E-90	-271203971	612	996	9.13E-86	CART	ARHGAP15
MAML2	6.83E-89	-2692100504	277	962	2.03E-84	CART	MAML2
SUPT3H	3.44E-88	-2651125032	264	944	1.03E-83	CART	SUPT3H
AP001011.1	3.29E-87	-3424116365	58	726	9.81E-83	CART	AP001011.1
MBNL1	3.65E-87	-1986380957	886	1	1.09E-82	CART	MBNL1
PITPNC1	5.20E-87	-28052891	0.33	966	1.55E-82	CART	PITPNC1
AC013394.1	1.12E-86	-3157230583	0.14	829	3.34E-82	CART	AC013394.1
AMBRA1	4.52E-85	-2769945419	142	859	1.35E-80	CART	AMBRA1
CDKAL1	2.22E-84	-2769149079	0.18	885	6.63E-80	CART	CDKAL1
XKR6	4.06E-84	-307196967	114	812	1.21E-79	CART	XKR6
DOCK10	5.07E-84	-2350373226	574	991	1.51E-79	CART	DOCK10
SKAP1	1.74E-83	-2113863648	748	1	5.18E-79	CART	SKAP1
ANKRD44	7.82E-83	-2120883237	673	983	2.33E-78	CART	ANKRD44
KLF12	1.10E-82	-2601101275	0.32	944	3.29E-78	CART	KLF12
RPS4Y1	1.53E-82	6450842393	0.84	21	4.56E-78	CART	RPS4Y1
ZFAND3	3.08E-82	-2480081923	333	953	9.18E-78	CART	ZFAND3
SNTB1	3.30E-81	-2923732384	109	782	9.83E-77	CART	SNTB1
PCED1B	1.62E-80	-2491459009	299	949	4.83E-76	CART	PCED1B
AC010609.1	1.89E-80	-3332949433	63	692	5.64E-76	CART	AC010609.1
PRKCQ	3.50E-80	-2177218659	424	979	1.04E-75	CART	PRKCQ
VPS13B	7.75E-80	-2434057451	271	936	2.31E-75	CART	VPS13B
PDE3B	8.04E-79	-2267504708	837	991	2.40E-74	CART	PDE3B
STAT4	8.20E-78	-212973199	614	987	2.44E-73	CART	STAT4
SIPA1L1	1.18E-77	-2216432176	513	979	3.52E-73	CART	SIPA1L1
ARL15	2.57E-77	-2704487959	132	803	7.65E-73	CART	ARL15
AC016831.7	4.13E-77	-2447373374	411	953	1.23E-72	CART	AC016831.7
FOXN3	5.94E-77	-2302098128	447	979	1.77E-72	CART	FOXN3
FUT8	1.08E-76	-2220035421	0.45	966	3.21E-72	CART	FUT8
PTPRJ	3.06E-76	-2343511217	295	0.94	9.12E-72	CART	PTPRJ
MAML3	3.52E-76	-3037505111	0.17	816	1.05E-71	CART	MAML3
CARD11	4.67E-76	-2488924236	208	872	1.39E-71	CART	CARD11
CD38	8.38E-76	-265583206	193	863	2.50E-71	CART	CD38
LRBA	1.13E-75	-2327420452	409	953	3.36E-71	CART	LRBA
MCTP2	1.27E-74	-267455391	186	846	3.78E-70	CART	MCTP2
CLASP1	1.40E-74	-2447081606	259	902	4.16E-70	CART	CLASP1
CD96	1.86E-74	-1773473638	0.87	991	5.55E-70	CART	CD96
SOS1	1.89E-74	-2222325766	637	979	5.62E-70	CART	SOS1
ATP10A	2.39E-74	-2652774198	127	786	7.11E-70	CART	ATP10A
COP1	3.92E-74	-2445460708	239	897	1.17E-69	CART	COP1
LEF1	6.29E-74	-287390313	208	842	1.87E-69	CART	LEF1
ATP8A1	7.05E-74	-2517178831	302	915	2.10E-69	CART	ATP8A1
TBC1D5	1.26E-73	-2179973999	414	0.97	3.76E-69	CART	TBC1D5
OXNAD1	1.32E-73	-2358917399	295	919	3.93E-69	CART	OXNAD1
MT-CYB	1.40E-73	1584196854	995	979	4.16E-69	CART	MT-CYB
STAG1	1.84E-73	-233161985	403	962	5.48E-69	CART	STAG1
DENND1A	1.97E-73	-3553047314	87	697	5.87E-69	CART	DENND1A
PARP8	2.40E-73	-2160238997	568	979	7.15E-69	CART	PARP8
MT-CO3	2.72E-73	1735768098	995	983	8.09E-69	CART	MT-CO3
KDM6A	3.33E-73	-2474282449	266	893	9.92E-69	CART	KDM6A
AC008014.1	6.34E-73	-2982916788	96	718	1.89E-68	CART	AC008014.1
MT-ND4	1.38E-72	1413030582	997	974	4.12E-68	CART	MT-ND4
CBLB	1.83E-72	-2131495328	0.54	979	5.47E-68	CART	CBLB
TCF12	1.87E-72	-2380594459	285	0.91	5.58E-68	CART	TCF12
EXOC4	1.88E-72	-2529953705	304	915	5.59E-68	CART	EXOC4
FAF1	2.44E-72	-2668165199	208	842	7.28E-68	CART	FAF1
ELMO1	5.88E-72	-2306025025	0.34	936	1.75E-67	CART	ELMO1
PRKCA	9.13E-72	-2232701293	414	949	2.72E-67	CART	PRKCA
SFMBT2	2.81E-71	-2528454732	175	816	8.39E-67	CART	SFMBT2
PAN3	3.22E-71	-2339095447	287	906	9.59E-67	CART	PAN3
MT-ATP6	4.18E-71	1267235238	997	979	1.25E-66	CART	MT-ATP6
MED13L	5.85E-71	-2012482224	323	957	1.74E-66	CART	MED13L
PRKCH	6.40E-71	-2060321204	553	983	1.91E-66	CART	PRKCH
RASA2	6.41E-71	-2170117345	417	949	1.91E-66	CART	RASA2
CHST11	1.04E-70	-2206760443	399	944	3.10E-66	CART	CHST11
THEMIS	1.43E-70	-2122169541	645	962	4.26E-66	CART	THEMIS
SMYD3	1.86E-70	-2817800771	175	799	5.55E-66	CART	SMYD3
SIK3	3.67E-70	-2357818503	348	923	1.09E-65	CART	SIK3
NELL2	4.75E-70	-2643386883	188	816	1.42E-65	CART	NELL2
AC058822.1	1.18E-69	-3691168813	48	598	3.52E-65	CART	AC058822.1
CASK	2.15E-69	-259763637	239	859	6.42E-65	CART	CASK
SAMD3	3.12E-69	-2363228489	322	923	9.28E-65	CART	SAMD3
PLCL2	3.52E-69	-2351082979	305	0.91	1.05E-64	CART	PLCL2
FCHSD2	6.69E-69	-2421877017	203	855	1.99E-64	CART	FCHSD2
ARHGEF3	1.91E-68	-2209503628	276	902	5.68E-64	CART	ARHGEF3
PDE7A	2.66E-68	-2055845637	528	966	7.92E-64	CART	PDE7A
FAM69A	1.81E-67	-2775328406	163	769	5.40E-63	CART	FAM69A
BTBD9	3.37E-67	-2920775092	116	705	1.00E-62	CART	BTBD9
DLEU2	4.20E-67	-2482558659	196	821	1.25E-62	CART	DLEU2
PCNX2	5.84E-67	-2295036255	332	915	1.74E-62	CART	PCNX2
ZEB1	7.70E-67	-1953244588	0.46	962	2.30E-62	CART	ZEB1
FBXW7	1.24E-66	-2333584502	342	902	3.69E-62	CART	FBXW7
PVT1	1.91E-66	-2418343858	292	885	5.68E-62	CART	PVT1
ZBTB20	2.23E-66	-2403561192	455	949	6.65E-62	CART	ZBTB20
LPP	2.31E-66	-216762273	386	923	6.90E-62	CART	LPP
ZNF609	4.41E-66	-247957934	282	868	1.31E-61	CART	ZNF609
BCAS3	5.66E-66	-2858663461	132	744	1.69E-61	CART	BCAS3
USP25	7.54E-66	-2255537088	299	906	2.25E-61	CART	USP25
PCNX1	1.66E-65	-1937215609	485	979	4.95E-61	CART	PCNX1
EXT1	2.04E-65	-288926362	104	684	6.09E-61	CART	EXT1
MLLT3	2.67E-65	-2295361889	416	923	7.95E-61	CART	MLLT3
USP3-AS1	4.23E-65	-3181094313	66	0.62	1.26E-60	CART	USP3-AS1
WDR70	6.42E-65	-247829707	205	821	1.91E-60	CART	WDR70
SSH2	7.89E-65	-2212645878	452	923	2.35E-60	CART	SSH2
ZCCHC7	1.27E-64	-2303129459	307	889	3.78E-60	CART	ZCCHC7
NCALD	2.15E-64	-2549687527	252	829	6.40E-60	CART	NCALD
KANSL1	2.56E-64	-1676571684	662	983	7.64E-60	CART	KANSL1
DOCK8	2.75E-64	-1498824205	797	987	8.20E-60	CART	DOCK8
ITCH	6.03E-64	-2166105905	287	885	1.80E-59	CART	ITCH
LMBR1	6.89E-64	-2263710466	191	816	2.05E-59	CART	LMBR1
KDM4C	7.88E-64	-2008648604	297	897	2.35E-59	CART	KDM4C
TRERF1	8.78E-64	-2555259394	149	739	2.62E-59	CART	TRERF1
FBXL17	9.70E-64	-2609195626	162	765	2.89E-59	CART	FBXL17
RABGAP1L	1.68E-63	-1768869091	703	974	5.01E-59	CART	RABGAP1L
ATP8B4	2.02E-63	-2116787513	226	821	6.02E-59	CART	ATP8B4
RORA-AS1	2.93E-63	-3626254191	53	573	8.72E-59	CART	RORA-AS1
ADK	3.61E-63	-2105018443	536	949	1.07E-58	CART	ADK
ITK	3.61E-63	-1844877079	526	966	1.08E-58	CART	ITK
LINC01934	8.37E-63	-2609987768	272	846	2.49E-58	CART	LINC01934
CAMKMT	2.54E-62	-2951885189	101	662	7.56E-58	CART	CAMKMT
PTPN22	5.26E-62	-1601654053	767	987	1.57E-57	CART	PTPN22
TXK	7.55E-62	-2517849736	239	812	2.25E-57	CART	TXK
RRAS2	8.04E-62	-2489919269	198	799	2.40E-57	CART	RRAS2
RPS9	9.60E-62	1186777607	982	957	2.86E-57	CART	RPS9
CAMK4	1.00E-61	-1768198078	784	983	2.99E-57	CART	CAMK4
RPL18	1.53E-61	1091814059	983	953	4.55E-57	CART	RPL18
AC116366.3	2.14E-61	-2644533534	134	718	6.39E-57	CART	AC116366.3
CD8B	2.65E-61	-1918705847	172	825	7.90E-57	CART	CD8B
RAD51B	4.10E-61	-2892815558	117	675	1.22E-56	CART	RAD51B
MAP3K5	6.71E-61	-2357630499	256	833	2.00E-56	CART	MAP3K5
CEP85L	7.46E-61	-2020888579	406	919	2.22E-56	CART	CEP85L
PACS1	8.13E-61	-2137096722	365	897	2.42E-56	CART	PACS1
RFX7	9.82E-61	-2315051509	307	859	2.93E-56	CART	RFX7
NFKB1	2.02E-60	-2302972312	307	872	6.01E-56	CART	NFKB1
FAM172A	2.19E-60	-2233237849	307	868	6.52E-56	CART	FAM172A
MAF	4.25E-60	3535935756	805	244	1.27E-55	CART	MAF
RPS2	4.80E-60	1150832709	0.98	966	1.43E-55	CART	RPS2
DYM	6.86E-60	-2219939571	198	812	2.04E-55	CART	DYM
CCSER2	7.06E-60	-1809453254	563	966	2.10E-55	CART	CCSER2
GMDS	7.54E-60	-2774646531	116	675	2.25E-55	CART	GMDS
DOCK2	7.66E-60	-1728047252	513	957	2.28E-55	CART	DOCK2
GNG2	1.03E-59	-1878160109	617	966	3.07E-55	CART	GNG2
NSMCE2	6.75E-59	-21860718	314	872	2.01E-54	CART	NSMCE2
BCL2	1.18E-58	-2033407547	553	953	3.53E-54	CART	BCL2
GAB2	1.22E-58	-2547661774	157	726	3.64E-54	CART	GAB2
CD8A	1.58E-58	-1567012326	0.19	868	4.71E-54	CART	CD8A
NCOA2	1.72E-58	-2080674313	347	889	5.12E-54	CART	NCOA2
ACYP2	2.11E-58	-2465769368	216	808	6.28E-54	CART	ACYP2
MYO1E	3.01E-58	-2690959853	106	645	8.98E-54	CART	MYO1E
DIP2B	3.37E-58	-2402118191	162	752	1.00E-53	CART	DIP2B
CDC42SE2	4.08E-58	-1289414437	884	987	1.22E-53	CART	CDC42SE2
CAMK2D	5.87E-58	-2138497342	356	885	1.75E-53	CART	CAMK2D
RIN3	9.77E-58	-2409919999	134	705	2.91E-53	CART	RIN3
AP003086.2	1.11E-57	-3110393748	61	556	3.30E-53	CART	AP003086.2
FTH1	1.62E-57	178647885	983	0.97	4.82E-53	CART	FTH1
WDR7	1.73E-57	-2163734266	233	816	5.15E-53	CART	WDR7
SPIDR	1.73E-57	-2271043089	208	782	5.16E-53	CART	SPIDR
STK39	1.75E-57	-2464400316	201	774	5.20E-53	CART	STK39
MAP2K5	1.86E-57	-2905295715	106	0.65	5.56E-53	CART	MAP2K5
GRAP2	2.21E-57	-2024589407	422	919	6.58E-53	CART	GRAP2
MT-CO1	3.65E-57	1228994042	995	987	1.09E-52	CART	MT-CO1
FTX	4.23E-57	-1783403874	604	962	1.26E-52	CART	FTX
MT-CO2	5.78E-57	1004553734	997	966	1.72E-52	CART	MT-CO2
ETV6	6.72E-57	-202058762	333	885	2.00E-52	CART	ETV6
MTFR1	6.84E-57	-2564038508	107	662	2.04E-52	CART	MTFR1
RPS3A	7.51E-57	1001632072	982	966	2.24E-52	CART	RPS3A
UTRN	7.55E-57	-1596535041	728	974	2.25E-52	CART	UTRN
PTK2B	8.62E-57	-2055269262	259	833	2.57E-52	CART	PTK2B
PPP6R2	9.63E-57	-2119121955	229	825	2.87E-52	CART	PPP6R2
MT-ND1	9.90E-57	1211905972	993	966	2.95E-52	CART	MT-ND1
RFX3	1.12E-56	-2805181507	117	662	3.34E-52	CART	RFX3
PICALM	1.23E-56	-1749156959	474	949	3.67E-52	CART	PICALM
MKLN1	1.43E-56	-1829162305	408	0.91	4.25E-52	CART	MKLN1
CYBA	1.45E-56	1120134451	997	966	4.32E-52	CART	CYBA
PTBP2	3.29E-56	-2366724659	221	795	9.80E-52	CART	PTBP2
RPL13	4.41E-56	8917124468	983	987	1.31E-51	CART	RPL13
RPL3	4.58E-56	1064912309	982	962	1.36E-51	CART	RPL3
SCML4	6.77E-56	-2514175438	178	748	2.02E-51	CART	SCML4
DENND4A	8.90E-56	-2243313508	287	833	2.65E-51	CART	DENND4A
PDSS2	9.91E-56	-2573320917	129	671	2.95E-51	CART	PDSS2
ATXN1	1.37E-55	-1754308626	616	0.97	4.07E-51	CART	ATXN1
PCCA	1.39E-55	-2625793895	122	658	4.14E-51	CART	PCCA
RPL13A	2.70E-55	8157697847	982	979	8.03E-51	CART	RPL13A
CDK17	2.79E-55	-2080341999	361	893	8.32E-51	CART	CDK17
LYST	2.89E-55	-1835233304	513	966	8.63E-51	CART	LYST
PIP4K2A	2.99E-55	-1646523832	589	944	8.90E-51	CART	PIP4K2A
LINC01004	3.16E-55	-2886326486	81	0.59	9.40E-51	CART	LINC01004
RPLP0	3.33E-55	1282292077	983	0.97	9.92E-51	CART	RPLP0
TIAM1	3.79E-55	-2886478299	125	658	1.13E-50	CART	TIAM1
TRAPPC9	4.76E-55	-2570056525	142	688	1.42E-50	CART	TRAPPC9
CLEC2D	5.03E-55	-1368449997	861	991	1.50E-50	CART	CLEC2D
DENND1B	7.58E-55	-1936218171	338	885	2.26E-50	CART	DENND1B
IMMP2L	9.32E-55	-2816334211	134	671	2.78E-50	CART	IMMP2L
RPS6KC1	1.49E-54	-2510858519	0.15	697	4.45E-50	CART	RPS6KC1
GSK3B	2.47E-54	-2015840098	292	0.85	7.37E-50	CART	GSK3B
VWA8	2.51E-54	-2695789625	0.14	675	7.47E-50	CART	VWA8
SMURF2	2.56E-54	-2172660776	261	821	7.62E-50	CART	SMURF2
AL157402.2	3.15E-54	-3543288057	48	504	9.38E-50	CART	AL157402.2
RPTOR	3.51E-54	-2671395911	96	615	1.05E-49	CART	RPTOR
AF165147.1	4.92E-54	-3081114878	66	551	1.47E-49	CART	AF165147.1
DOCK5	5.63E-54	-3043998144	76	568	1.68E-49	CART	DOCK5
BTBD11	7.61E-54	-2542078711	0.15	697	2.27E-49	CART	BTBD11
HLA-B	1.32E-53	845471853	995	983	3.94E-49	CART	HLA-B
IFITM1	1.80E-53	-2364477781	149	705	5.37E-49	CART	IFITM1
TBCK	2.36E-53	-2690690461	125	654	7.04E-49	CART	TBCK
FBXO11	2.48E-53	-1836090659	0.34	863	7.38E-49	CART	FBXO11
RPL23A	2.66E-53	8960487006	983	0.97	7.92E-49	CART	RPL23A
COG5	5.05E-53	-2090943739	284	821	1.50E-48	CART	COG5
INPP4B	6.73E-53	-2050396157	383	0.88	2.01E-48	CART	INPP4B
FOCAD	1.20E-52	-2605560485	112	637	3.56E-48	CART	FOCAD
INVS	1.27E-52	-2793137008	127	641	3.79E-48	CART	INVS
BICDL1	1.30E-52	-2528035202	144	692	3.86E-48	CART	BICDL1
MNAT1	1.71E-52	-1744568645	406	893	5.09E-48	CART	MNAT1
SLFN12L	1.78E-52	-1790870814	0.49	0.94	5.32E-48	CART	SLFN12L
B2M	2.78E-52	7265136971	998	991	8.27E-48	CART	B2M
ATG7	2.82E-52	-2583831782	142	667	8.40E-48	CART	ATG7
ITPR2	4.12E-52	-1699975847	449	936	1.23E-47	CART	ITPR2
PIK3R5	5.20E-52	-2307807815	198	744	1.55E-47	CART	PIK3R5
CATSPERB	5.28E-52	-3673492868	61	517	1.57E-47	CART	CATSPERB
PATJ	6.17E-52	-2357196982	142	684	1.84E-47	CART	PATJ
VTI1A	6.73E-52	-2195871204	343	0.85	2.01E-47	CART	VTI1A
AIF1	7.54E-52	-2500225651	117	641	2.25E-47	CART	AIF1
RASA1	1.38E-51	-2332723283	213	748	4.10E-47	CART	RASA1
MBD5	1.38E-51	-193234173	409	902	4.12E-47	CART	MBD5
AC001226.2	1.41E-51	-3785133347	46	479	4.19E-47	CART	AC001226.2
PUM2	2.00E-51	-1708914817	459	915	5.97E-47	CART	PUM2
ST6GAL1	2.06E-51	-2128117277	309	829	6.14E-47	CART	ST6GAL1
EEF1A1	2.46E-51	9156177787	987	979	7.32E-47	CART	EEF1A1
GPHN	3.01E-51	-3248959724	112	603	8.96E-47	CART	GPHN
RPS14	3.40E-51	8785491685	0.98	949	1.01E-46	CART	RPS14
RPS3	3.99E-51	8354257605	0.98	966	1.19E-46	CART	RPS3
SUMF1	4.11E-51	-2512946763	144	667	1.22E-46	CART	SUMF1
ARHGAP26	5.06E-51	-2380554845	0.2	731	1.51E-46	CART	ARHGAP26
SCLT1	5.66E-51	-2331181054	252	778	1.69E-46	CART	SCLT1
HERC1	5.97E-51	-1642435664	413	923	1.78E-46	CART	HERC1
ARID2	7.61E-51	-1870585944	361	855	2.27E-46	CART	ARID2
PPP6R3	1.05E-50	-1685475826	398	915	3.13E-46	CART	PPP6R3
GPCPD1	1.18E-50	-1827626873	267	825	3.52E-46	CART	GPCPD1
BABAM2	1.33E-50	-1910129758	363	868	3.95E-46	CART	BABAM2
PPP1R16B	1.58E-50	-1817012332	384	0.88	4.71E-46	CART	PPP1R16B
GPR75-ASB3	2.38E-50	-4226906153	21	0.41	7.10E-46	CART	GPR75-ASB3
CCL5	4.13E-50	-1568876084	498	957	1.23E-45	CART	CCL5
RPL7	5.53E-50	1006599699	979	966	1.65E-45	CART	RPL7
PARP15	6.58E-50	-2152645613	177	722	1.96E-45	CART	PARP15
INPP5D	9.26E-50	-1715808945	0.46	936	2.76E-45	CART	INPP5D
RPL19	9.66E-50	8322135222	982	0.97	2.88E-45	CART	RPL19
NEDD9	9.92E-50	-1973148519	261	803	2.96E-45	CART	NEDD9
ITFG1	1.03E-49	-2070376205	294	803	3.07E-45	CART	ITFG1
XPR1	1.29E-49	-2388315094	149	671	3.85E-45	CART	XPR1
NLRC5	1.45E-49	-2121943114	219	761	4.31E-45	CART	NLRC5
TNKS	1.68E-49	-1968110967	236	782	4.99E-45	CART	TNKS
DOCK9	1.98E-49	-1964808958	213	769	5.91E-45	CART	DOCK9
HIVEP3	3.22E-49	-2452486187	186	701	9.60E-45	CART	HIVEP3
PECAM1	3.80E-49	-2488017169	78	556	1.13E-44	CART	PECAM1
RFX3-AS1	4.29E-49	-2857887038	61	509	1.28E-44	CART	RFX3-AS1
PRKX	4.86E-49	-17319654	526	923	1.45E-44	CART	PRKX
CDC14A	5.65E-49	-1824085786	0.49	932	1.68E-44	CART	CDC14A
STXBP5	6.13E-49	-2303297359	0.18	697	1.83E-44	CART	STXBP5
CCDC91	7.18E-49	-194843787	427	885	2.14E-44	CART	CCDC91
RNF38	7.26E-49	-1988065633	302	829	2.16E-44	CART	RNF38
XYLT1	8.77E-49	-2077873911	183	709	2.61E-44	CART	XYLT1
TBC1D22A	1.06E-48	-1712523381	373	876	3.15E-44	CART	TBC1D22A
RPS29	1.10E-48	-774359713	983	0.97	3.27E-44	CART	RPS29
RPL8	1.25E-48	9166069156	979	962	3.73E-44	CART	RPL8
CLASP2	1.46E-48	-2117596913	215	748	4.34E-44	CART	CLASP2
ZNF83	1.48E-48	-2248281516	0.15	671	4.41E-44	CART	ZNF83
TAOK3	1.64E-48	-1350734774	686	0.97	4.90E-44	CART	TAOK3
PRKCB	1.96E-48	-174155872	441	919	5.85E-44	CART	PRKCB
TMEM131L	2.01E-48	-215367189	226	756	5.98E-44	CART	TMEM131L
KLHL2	2.18E-48	-2306701305	241	748	6.49E-44	CART	KLHL2
TMEM135	2.19E-48	-2361900107	139	645	6.52E-44	CART	TMEM135
ASCC3	2.73E-48	-1832554687	429	915	8.14E-44	CART	ASCC3
ANKRD17	3.41E-48	-1564492537	492	927	1.02E-43	CART	ANKRD17
ARMH3	3.51E-48	-2380774545	124	628	1.05E-43	CART	ARMH3
RC3H1	4.65E-48	-176226303	351	876	1.39E-43	CART	RC3H1
PRKCA-AS1	5.58E-48	-3354884714	36	0.44	1.66E-43	CART	PRKCA-AS1
PLPP1	5.72E-48	-1817644688	244	791	1.70E-43	CART	PLPP1
MGAT5	6.49E-48	-2131302535	252	782	1.93E-43	CART	MGAT5
SERINC5	8.75E-48	-1916362446	363	868	2.61E-43	CART	SERINC5
ATAD2B	1.07E-47	-1890012135	259	821	3.20E-43	CART	ATAD2B
AC006059.1	1.36E-47	-3913165666	28	0.41	4.05E-43	CART	AC006059.1
RNF111	1.64E-47	-1819707667	281	812	4.89E-43	CART	RNF111
PSME4	1.80E-47	-1932438153	297	0.85	5.35E-43	CART	PSME4
STIM1	1.82E-47	-1761071504	386	876	5.41E-43	CART	STIM1
BIRC6	1.85E-47	-130722772	683	966	5.51E-43	CART	BIRC6
KLRC4-KLRK1	2.62E-47	-3066776763	45	457	7.80E-43	CART	KLRC4-KLRK1
DIAPH2	3.13E-47	-2132976013	234	744	9.33E-43	CART	DIAPH2
DPYD-AS1	3.23E-47	-4213839903	28	406	9.63E-43	CART	DPYD-AS1
RASGRF2	3.39E-47	-2737125812	102	581	1.01E-42	CART	RASGRF2
PPP3CC	3.78E-47	-1939023537	277	808	1.13E-42	CART	PPP3CC
SP100	3.88E-47	-1294599261	776	991	1.16E-42	CART	SP100
WWOX	4.92E-47	-2694957079	112	581	1.47E-42	CART	WWOX
RB1	4.94E-47	-2019594001	299	829	1.47E-42	CART	RB1
CEP128	5.65E-47	-2762173007	97	564	1.68E-42	CART	CEP128
GNAQ	9.16E-47	-2032475795	256	778	2.73E-42	CART	GNAQ
KIAA0825	1.04E-46	-2877473982	87	543	3.11E-42	CART	KIAA0825
KAT2B	1.26E-46	-1942241302	294	821	3.74E-42	CART	KAT2B
EIF4G3	1.30E-46	-1672880901	459	0.91	3.87E-42	CART	EIF4G3
SENP7	1.39E-46	-1681572547	406	902	4.13E-42	CART	SENP7
MVB12B	1.40E-46	-2388218947	84	547	4.16E-42	CART	MVB12B
FARS2	1.49E-46	-1950685892	266	791	4.43E-42	CART	FARS2
RALGAPA2	1.51E-46	-1959522375	201	739	4.49E-42	CART	RALGAPA2
TNRC6B	1.75E-46	-1269711354	787	987	5.21E-42	CART	TNRC6B
NKG7	2.16E-46	-1104347259	289	855	6.44E-42	CART	NKG7
RIC1	2.17E-46	-2115878152	158	679	6.45E-42	CART	RIC1
SLMAP	2.34E-46	-1860248705	0.29	829	6.98E-42	CART	SLMAP
JARID2	3.99E-46	-1696039763	388	868	1.19E-41	CART	JARID2
ARAP2	4.63E-46	-1685714634	546	944	1.38E-41	CART	ARAP2
ZHX2	5.26E-46	-2259021615	132	628	1.57E-41	CART	ZHX2
RPLP1	5.78E-46	7918257735	983	983	1.72E-41	CART	RPLP1
RNF157	6.52E-46	-2106349183	182	705	1.94E-41	CART	RNF157
CDYL	7.37E-46	-2162995229	201	714	2.20E-41	CART	CDYL
FNDC3A	1.14E-45	-192853638	333	825	3.39E-41	CART	FNDC3A
ERMP1	1.64E-45	-2248353218	139	0.65	4.88E-41	CART	ERMP1
MTRNR2L12	1.88E-45	9539174354	995	983	5.60E-41	CART	MTRNR2L12
TNIK	2.22E-45	-1589553352	512	932	6.61E-41	CART	TNIK
NT5C2	3.35E-45	-201794079	241	756	9.97E-41	CART	NT5C2
RPL15	3.58E-45	7817042795	0.98	953	1.07E-40	CART	RPL15
MKL1	5.05E-45	-2319008155	0.15	637	1.50E-40	CART	MKL1
YES1	9.35E-45	-2038799057	186	705	2.79E-40	CART	YES1
GMDS-DT	1.09E-44	-239992324	0.17	0.65	3.25E-40	CART	GMDS-DT
AL645568.1	1.12E-44	-2130674538	135	624	3.32E-40	CART	AL645568.1
RPL18A	1.41E-44	7857339426	988	0.97	4.21E-40	CART	RPL18A
LCLAT1	1.56E-44	-2354708562	125	594	4.65E-40	CART	LCLAT1
ERC1	1.66E-44	-2174731812	272	756	4.95E-40	CART	ERC1
NCOA3	2.25E-44	-148581648	528	919	6.70E-40	CART	NCOA3
ANKUB1	2.90E-44	-3391281478	0.04	419	8.63E-40	CART	ANKUB1
JMJD1C	2.95E-44	-1474461563	616	0.94	8.80E-40	CART	JMJD1C
H2AFZ	3.54E-44	149474441	934	808	1.05E-39	CART	H2AFZ
PRKACB	4.38E-44	-1532757888	497	919	1.30E-39	CART	PRKACB
CAB39	4.73E-44	-1576816352	517	923	1.41E-39	CART	CAB39
RALGAPA1	8.32E-44	-1769549553	342	838	2.48E-39	CART	RALGAPA1
DENND4C	1.50E-43	-1762078821	315	816	4.48E-39	CART	DENND4C
SPPL3	1.71E-43	-1891598463	249	756	5.10E-39	CART	SPPL3
FRS2	1.72E-43	-2482909293	122	598	5.12E-39	CART	FRS2
TSPOAP1-AS1	1.75E-43	-2335791065	147	624	5.22E-39	CART	TSPOAP1-AS1
DHRS3	1.77E-43	-3016733215	56	457	5.28E-39	CART	DHRS3
ABCD2	1.98E-43	-1990249234	238	731	5.90E-39	CART	ABCD2
DYRK1A	1.98E-43	-1678986392	0.33	855	5.91E-39	CART	DYRK1A
LINC01684	1.99E-43	-2973557916	43	427	5.92E-39	CART	LINC01684
SYNGR1	2.48E-43	-32266498	46	432	7.40E-39	CART	SYNGR1
TTC39B	2.57E-43	-2445358088	112	573	7.67E-39	CART	TTC39B
SLC10A7	2.65E-43	-2649864542	96	538	7.90E-39	CART	SLC10A7
PPP3CA	3.83E-43	-1422267898	548	915	1.14E-38	CART	PPP3CA
VPS8	3.90E-43	-1726051245	401	846	1.16E-38	CART	VPS8
ZNF148	4.17E-43	-1506941773	526	927	1.24E-38	CART	ZNF148
UBAC2	4.33E-43	-1747176197	399	855	1.29E-38	CART	UBAC2
ITGB1	4.98E-43	2387496588	807	479	1.48E-38	CART	ITGB1
LINC02328	5.13E-43	-3259170235	58	453	1.53E-38	CART	LINC02328
SIDT1	5.37E-43	-2327051628	117	577	1.60E-38	CART	SIDT1
CDK8	6.06E-43	-2413835378	0.13	594	1.81E-38	CART	CDK8
OAZ1	7.16E-43	8834589371	969	966	2.13E-38	CART	OAZ1
MAP4K4	1.51E-42	-1678432961	309	821	4.51E-38	CART	MAP4K4
AC007216.4	1.59E-42	-4011471302	21	359	4.73E-38	CART	AC007216.4
PTPRA	2.06E-42	-1621308786	398	868	6.13E-38	CART	PTPRA
GBF1	2.27E-42	-191196179	231	731	6.77E-38	CART	GBF1
TTC17	2.69E-42	-162194827	446	889	8.02E-38	CART	TTC17
ZDHHC20	2.82E-42	-1825145854	356	829	8.41E-38	CART	ZDHHC20
RUNX3	2.94E-42	-1288396995	708	974	8.75E-38	CART	RUNX3
ADARB2	3.00E-42	-3047104384	43	423	8.94E-38	CART	ADARB2
RPS16	3.66E-42	7625356779	982	974	1.09E-37	CART	RPS16
LRCH1	4.05E-42	-2257936413	158	641	1.21E-37	CART	LRCH1
FAM196B	4.70E-42	-349747459	26	372	1.40E-37	CART	FAM196B
AP4B1-AS1	5.33E-42	-2914808764	0.05	436	1.59E-37	CART	AP4B1-AS1
ABHD18	5.92E-42	-1845879032	0.18	679	1.76E-37	CART	ABHD18
FAM117B	6.58E-42	-2826997243	81	496	1.96E-37	CART	FAM117B
PIBF1	6.68E-42	-1955032694	272	774	1.99E-37	CART	PIBF1
RHOH	6.82E-42	-1280424172	698	957	2.03E-37	CART	RHOH
NFATC3	7.53E-42	-143455581	507	0.91	2.24E-37	CART	NFATC3
IL12RB2	7.54E-42	-2744889769	134	581	2.25E-37	CART	IL12RB2
BRAF	8.76E-42	-1854203457	378	838	2.61E-37	CART	BRAF
ARMH4	9.68E-42	-3150157209	43	415	2.89E-37	CART	ARMH4
C18orf25	1.07E-41	-1756557133	224	739	3.20E-37	CART	C18orf25
TXN	1.17E-41	1435324074	927	885	3.48E-37	CART	TXN
INPP4A	1.29E-41	-1498351054	426	893	3.83E-37	CART	INPP4A
OSBPL3	1.56E-41	-1665502007	309	808	4.64E-37	CART	OSBPL3
EXOC6B	1.83E-41	-279843148	106	0.53	5.45E-37	CART	EXOC6B
LDLRAD4	1.87E-41	-1618240081	507	902	5.57E-37	CART	LDLRAD4
FOXO1	2.55E-41	-176372881	383	842	7.59E-37	CART	FOXO1
HIP1	2.98E-41	-2844654197	96	517	8.89E-37	CART	HIP1
USP15	3.17E-41	-1157329985	752	966	9.43E-37	CART	USP15
LRRN3	3.69E-41	-1981256027	254	756	1.10E-36	CART	LRRN3
RPL29	3.70E-41	753789186	982	966	1.10E-36	CART	RPL29
TGFBR1	4.21E-41	-1924910366	257	739	1.25E-36	CART	TGFBR1
CA6	4.27E-41	-3032278225	46	419	1.27E-36	CART	CA6
CUL3	5.30E-41	-1704571228	431	859	1.58E-36	CART	CUL3
ATP9B	5.40E-41	-2061224971	223	705	1.61E-36	CART	ATP9B
ITGA1	5.56E-41	-2138177469	211	692	1.66E-36	CART	ITGA1
TNFRSF4	6.44E-41	4428463713	578	64	1.92E-36	CART	TNFRSF4
KIAA1468	6.49E-41	-1827676123	261	748	1.93E-36	CART	KIAA1468
PDE4D	6.54E-41	-1211902263	0.8	987	1.95E-36	CART	PDE4D
AP3B1	6.77E-41	-1846307796	338	795	2.02E-36	CART	AP3B1
FAM168A	9.52E-41	-2561874842	92	517	2.84E-36	CART	FAM168A
EEF1B2	1.02E-40	1250886882	954	906	3.03E-36	CART	EEF1B2
AC087286.2	1.02E-40	-4031735899	17	333	3.05E-36	CART	AC087286.2
AC027018.1	1.08E-40	-2540787508	68	474	3.21E-36	CART	AC027018.1
ADAM10	1.09E-40	-1526207463	475	893	3.25E-36	CART	ADAM10
RICTOR	1.10E-40	-140989054	569	932	3.28E-36	CART	RICTOR
RPL5	1.35E-40	8513958803	982	966	4.02E-36	CART	RPL5
NCOA1	1.38E-40	-1776986204	272	752	4.13E-36	CART	NCOA1
PEAK1	1.45E-40	-2342383404	134	581	4.32E-36	CART	PEAK1
RPS23	1.69E-40	7419571293	983	983	5.03E-36	CART	RPS23
AL136531.2	1.72E-40	-4077141722	21	346	5.12E-36	CART	AL136531.2
ASXL2	1.81E-40	-1505206687	401	868	5.38E-36	CART	ASXL2
RPS27A	2.20E-40	7168851101	985	966	6.56E-36	CART	RPS27A
CLYBL	2.72E-40	-2786572597	71	466	8.09E-36	CART	CLYBL
PI4KA	3.00E-40	-2129396929	183	671	8.93E-36	CART	PI4KA
HIF1A-AS2	3.83E-40	-3510303677	0.03	368	1.14E-35	CART	HIF1A-AS2
ZNF407	3.85E-40	-1908320673	216	701	1.15E-35	CART	ZNF407
FTO	4.07E-40	-2014008137	0.2	688	1.21E-35	CART	FTO
SMG6	4.54E-40	-1785498344	299	795	1.35E-35	CART	SMG6
GPR155	5.37E-40	-1851015445	366	825	1.60E-35	CART	GPR155
PLAC8	6.08E-40	-1851599489	208	714	1.81E-35	CART	PLAC8
IFITM3	6.27E-40	-2455672611	73	479	1.87E-35	CART	IFITM3
NEK7	6.70E-40	-154919951	422	893	2.00E-35	CART	NEK7
SUCLG2	6.72E-40	-1736558477	373	846	2.00E-35	CART	SUCLG2
CD4	6.73E-40	3615433569	599	0.09	2.00E-35	CART	CD4
SLC39A11	7.18E-40	-228780821	87	504	2.14E-35	CART	SLC39A11
DDX5	7.32E-40	8937675199	0.98	974	2.18E-35	CART	DDX5
BICRAL	8.22E-40	-1829069594	252	752	2.45E-35	CART	BICRAL
FOXJ3	9.02E-40	-1541872704	0.38	859	2.69E-35	CART	FOXJ3
JPX	9.37E-40	-1457108642	426	889	2.79E-35	CART	JPX
ANKIB1	9.90E-40	-1668771778	417	846	2.95E-35	CART	ANKIB1
UVRAG	1.12E-39	-1775859294	266	761	3.34E-35	CART	UVRAG
GLCCI1	1.12E-39	-2213167386	0.31	739	3.34E-35	CART	GLCCI1
ZNF611	1.23E-39	-2000687877	157	632	3.68E-35	CART	ZNF611
RPL7A	1.59E-39	6861870057	983	966	4.75E-35	CART	RPL7A
UBR3	1.85E-39	-1947226142	231	705	5.51E-35	CART	UBR3
ZNF683	1.86E-39	-2461876674	59	444	5.55E-35	CART	ZNF683
CCNY	1.94E-39	-2198430686	193	662	5.77E-35	CART	CCNY
SOS2	2.04E-39	-1616477587	383	859	6.08E-35	CART	SOS2
DLG1	2.20E-39	-1654199734	417	842	6.55E-35	CART	DLG1
GALNT11	2.23E-39	-1756762865	241	752	6.65E-35	CART	GALNT11
SRPK2	2.25E-39	-1418488628	569	944	6.70E-35	CART	SRPK2
KMT2C	2.66E-39	-1341079803	548	927	7.93E-35	CART	KMT2C
AGTPBP1	2.89E-39	-1948356428	238	722	8.61E-35	CART	AGTPBP1
RPL10	3.22E-39	7098069037	987	974	9.58E-35	CART	RPL10
CTSW	3.34E-39	-1391628573	238	782	9.95E-35	CART	CTSW
FTL	4.73E-39	1068539138	979	0.97	1.41E-34	CART	FTL
FAM49B	4.93E-39	-1274804475	627	962	1.47E-34	CART	FAM49B
LINC01135	5.12E-39	-3050616691	0.04	389	1.53E-34	CART	LINC01135
STK17B	6.22E-39	-9138624771	949	983	1.85E-34	CART	STK17B
SCAPER	7.41E-39	-1989220978	251	714	2.21E-34	CART	SCAPER
RPS13	7.84E-39	7285963661	0.98	957	2.34E-34	CART	RPS13
DTNB	8.78E-39	-2322606685	142	0.59	2.62E-34	CART	DTNB
SEC24B	9.08E-39	-1973010363	213	692	2.70E-34	CART	SEC24B
JAK2	1.01E-38	-1810991654	248	726	3.00E-34	CART	JAK2
EXOC2	1.12E-38	-1792704034	261	756	3.35E-34	CART	EXOC2
RELL1	1.19E-38	-182996455	139	603	3.55E-34	CART	RELL1
HDAC8	1.38E-38	-2137115263	201	658	4.10E-34	CART	HDAC8
ABCC1	1.39E-38	-2099495645	183	645	4.15E-34	CART	ABCC1
CCDC141	1.39E-38	-3176635573	61	436	4.15E-34	CART	CCDC141
SRBD1	1.49E-38	-2060481005	177	637	4.44E-34	CART	SRBD1
XRN1	1.53E-38	-1302798584	639	932	4.56E-34	CART	XRN1
PTPN4	1.68E-38	-1383755103	508	902	5.01E-34	CART	PTPN4
ATRN	1.92E-38	-2476005812	96	504	5.73E-34	CART	ATRN
SLC12A6	1.99E-38	-1938175388	188	658	5.94E-34	CART	SLC12A6
AC131571.1	2.20E-38	-4339703248	17	316	6.56E-34	CART	AC131571.1
NRF1	2.67E-38	-2209023773	134	577	7.95E-34	CART	NRF1
TAB2	2.72E-38	-1269828765	668	957	8.11E-34	CART	TAB2
DOCK11	2.84E-38	-1659652914	0.34	825	8.46E-34	CART	DOCK11
RPS7	3.45E-38	7350380675	985	966	1.03E-33	CART	RPS7
S100A4	3.63E-38	1171817194	974	949	1.08E-33	CART	S100A4
AC006978.2	3.98E-38	-3272665952	23	338	1.19E-33	CART	AC006978.2
PLXNA4	4.09E-38	-280178903	33	363	1.22E-33	CART	PLXNA4
AKAP13	7.48E-38	-9944249427	802	979	2.23E-33	CART	AKAP13
PBX3	7.63E-38	-2792865877	99	496	2.27E-33	CART	PBX3
AL360091.3	7.71E-38	-311490549	35	368	2.30E-33	CART	AL360091.3
SND1	9.57E-38	-1802426725	305	782	2.85E-33	CART	SND1
AL049869.3	1.03E-37	-3721595841	28	346	3.08E-33	CART	AL049869.3
SRGN	1.07E-37	1010502789	977	962	3.19E-33	CART	SRGN
WWP2	1.09E-37	-2017173088	178	645	3.24E-33	CART	WWP2
PHF21A	1.24E-37	-1635170812	371	812	3.70E-33	CART	PHF21A
AC027644.4	1.25E-37	-3508044676	0.02	325	3.74E-33	CART	AC027644.4
CERS6	1.65E-37	-238052874	111	521	4.91E-33	CART	CERS6
GALNT2	1.72E-37	-1538777188	137	594	5.14E-33	CART	GALNT2
TIAM2	1.85E-37	-2493454545	106	517	5.52E-33	CART	TIAM2
NLK	2.06E-37	-2272534043	114	534	6.13E-33	CART	NLK
TMEM131	2.23E-37	-169980488	269	748	6.66E-33	CART	TMEM131
HLA-A	2.50E-37	661883265	997	983	7.46E-33	CART	HLA-A
ESYT2	2.72E-37	-1537088719	0.34	812	8.09E-33	CART	ESYT2
ADAM19	2.73E-37	-154856703	0.53	927	8.13E-33	CART	ADAM19
AC092652.2	2.83E-37	-3890649825	23	329	8.44E-33	CART	AC092652.2
EPB41	3.02E-37	-1292543135	703	966	9.01E-33	CART	EPB41
CCDC146	3.21E-37	-2278958601	0.14	577	9.57E-33	CART	CCDC146
MPP7	3.55E-37	-2213303546	102	521	1.06E-32	CART	MPP7
RPL4	3.59E-37	1086407011	955	932	1.07E-32	CART	RPL4
DOK6	3.74E-37	-3053166455	74	453	1.11E-32	CART	DOK6
LRCH3	4.03E-37	-1703022866	302	765	1.20E-32	CART	LRCH3
USP34	4.36E-37	-1207605359	637	0.94	1.30E-32	CART	USP34
UBR1	4.46E-37	-1491574328	373	833	1.33E-32	CART	UBR1
AC013652.1	4.98E-37	-2683412818	64	432	1.48E-32	CART	AC013652.1
MBTD1	5.88E-37	-2053664966	182	637	1.75E-32	CART	MBTD1
BTG1	5.97E-37	1098220506	983	962	1.78E-32	CART	BTG1
SCFD2	6.54E-37	-2522798176	74	457	1.95E-32	CART	SCFD2
INKA2	6.63E-37	-3305872925	41	0.38	1.98E-32	CART	INKA2
FAM120B	8.34E-37	-2003378756	158	607	2.49E-32	CART	FAM120B
HIVEP1	8.45E-37	-2079416403	205	667	2.52E-32	CART	HIVEP1
EIF1AY	8.71E-37	6169131511	487	9	2.60E-32	CART	EIF1AY
TPK1	1.21E-36	-2624717843	111	517	3.60E-32	CART	TPK1
RNGTT	1.25E-36	-1778165388	231	705	3.71E-32	CART	RNGTT
USP24	1.31E-36	-1878068494	216	679	3.90E-32	CART	USP24
ATP11B	1.36E-36	-1465230182	431	859	4.07E-32	CART	ATP11B
SCAF8	1.43E-36	-1711016835	289	761	4.27E-32	CART	SCAF8
TXNIP	1.80E-36	1285882639	975	966	5.35E-32	CART	TXNIP
AC011933.4	1.93E-36	-4109487272	0.02	312	5.75E-32	CART	AC011933.4
SYTL3	2.37E-36	-1299684966	0.66	957	7.06E-32	CART	SYTL3
TENT2	2.42E-36	-153698637	373	821	7.21E-32	CART	TENT2
GPR183	2.52E-36	2854994233	665	239	7.51E-32	CART	GPR183
RPS6KA3	2.56E-36	-1260877829	637	927	7.63E-32	CART	RPS6KA3
RACK1	3.68E-36	720849893	0.98	966	1.10E-31	CART	RACK1
TET2	3.70E-36	-1704427318	297	748	1.10E-31	CART	TET2
MON2	3.91E-36	-1560316018	295	761	1.17E-31	CART	MON2
ZNF75D	4.03E-36	-2158698762	117	0.53	1.20E-31	CART	ZNF75D
TMCC1	4.18E-36	-205624183	193	641	1.25E-31	CART	TMCC1
GATAD2B	4.33E-36	-1466769074	409	842	1.29E-31	CART	GATAD2B
RNF169	4.89E-36	-2081167515	145	585	1.46E-31	CART	RNF169
ARID1B	5.03E-36	-1186409099	678	957	1.50E-31	CART	ARID1B
MFSD6	5.16E-36	-1809328916	211	684	1.54E-31	CART	MFSD6
GZMB	5.44E-36	-1300101988	536	0.94	1.62E-31	CART	GZMB
ZNF718	5.65E-36	-2681753566	79	457	1.68E-31	CART	ZNF718
CDC27	6.33E-36	-1469360192	0.38	829	1.89E-31	CART	CDC27
LCOR	6.52E-36	-1597937696	338	808	1.94E-31	CART	LCOR
COMMD10	6.98E-36	-2321375018	195	632	2.08E-31	CART	COMMD10
RFTN1	7.86E-36	-1531204624	429	0.88	2.34E-31	CART	RFTN1
HCG17	9.50E-36	-3141493183	41	368	2.83E-31	CART	HCG17
AC137810.1	9.58E-36	-5079005869	12	282	2.85E-31	CART	AC137810.1
CLEC16A	1.03E-35	-2119366191	129	556	3.07E-31	CART	CLEC16A
EIF1	1.30E-35	6958508384	0.99	966	3.86E-31	CART	EIF1
ASH1L	1.32E-35	-1250137962	683	957	3.94E-31	CART	ASH1L
UBC	1.36E-35	8875641151	979	962	4.04E-31	CART	UBC
AC009313.1	1.36E-35	-3848656595	26	329	4.05E-31	CART	AC009313.1
STRN3	1.45E-35	-1493184165	304	786	4.33E-31	CART	STRN3
NF1	1.60E-35	-1493246357	381	825	4.77E-31	CART	NF1
HERC4	1.79E-35	-1323873918	505	906	5.34E-31	CART	HERC4
PIK3CD	2.00E-35	-1722784838	375	816	5.96E-31	CART	PIK3CD
ITSN2	2.42E-35	-1505296218	441	846	7.20E-31	CART	ITSN2
USP47	2.52E-35	-1244553892	482	919	7.50E-31	CART	USP47
AC073167.1	2.78E-35	-3593413777	26	325	8.29E-31	CART	AC073167.1
FBXW11	2.82E-35	-1736852855	257	722	8.40E-31	CART	FBXW11
S100A11	3.15E-35	919509407	974	944	9.39E-31	CART	S100A11
IKZF1	3.25E-35	-9451325484	848	996	9.69E-31	CART	IKZF1
CALM1	3.44E-35	8231102253	975	0.97	1.02E-30	CART	CALM1
FOXP1	3.48E-35	-1275302961	693	953	1.04E-30	CART	FOXP1
PEX14	3.57E-35	-2031398412	102	504	1.06E-30	CART	PEX14
VPS45	3.60E-35	-2245625612	0.14	564	1.07E-30	CART	VPS45
ABHD15-AS1	3.85E-35	-3083675134	26	329	1.15E-30	CART	ABHD15-AS1
ZNF827	4.13E-35	-2107824709	155	581	1.23E-30	CART	ZNF827
NACA	4.23E-35	7089264179	977	966	1.26E-30	CART	NACA
C4orf19	4.43E-35	-366007388	0.03	333	1.32E-30	CART	C4orf19
HSP90AA1	4.85E-35	9040759324	975	949	1.45E-30	CART	HSP90AA1
LCP2	5.13E-35	-1203575857	665	0.94	1.53E-30	CART	LCP2
VPS37B	5.89E-35	-2042277935	168	607	1.76E-30	CART	VPS37B
KATNAL1	7.09E-35	-2239096876	112	517	2.11E-30	CART	KATNAL1
PAG1	7.96E-35	-1159735319	716	957	2.37E-30	CART	PAG1
NBAS	8.31E-35	-1649007033	233	697	2.48E-30	CART	NBAS
WWP1	9.28E-35	-1427963702	388	838	2.77E-30	CART	WWP1
TNFSF8	9.31E-35	-1681074816	208	675	2.77E-30	CART	TNFSF8
GAPDH	9.75E-35	929060314	0.98	983	2.91E-30	CART	GAPDH
TTN	1.17E-34	-2195959717	114	521	3.48E-30	CART	TTN
USPL1	1.19E-34	-1931838522	152	594	3.55E-30	CART	USPL1
AL590006.1	1.24E-34	-3552639306	23	312	3.70E-30	CART	AL590006.1
RPL10A	1.36E-34	8030100561	975	949	4.06E-30	CART	RPL10A
INPP5A	1.43E-34	-3066448189	54	393	4.25E-30	CART	INPP5A
MSI2	1.57E-34	-1402734633	505	893	4.68E-30	CART	MSI2
H3F3A	1.60E-34	7146404932	975	966	4.77E-30	CART	H3F3A
APBB1IP	1.83E-34	-1031115276	802	987	5.44E-30	CART	APBB1IP
CMIP	1.95E-34	-1350365831	0.5	893	5.80E-30	CART	CMIP
PIAS1	1.99E-34	-1604218147	472	0.88	5.94E-30	CART	PIAS1
SGMS1	2.04E-34	-1892682823	188	637	6.09E-30	CART	SGMS1
R3HDM1	2.07E-34	-160586841	371	816	6.16E-30	CART	R3HDM1
SEC22A	2.11E-34	-2413029429	114	509	6.28E-30	CART	SEC22A
SLC38A9	2.17E-34	-1898074561	158	0.59	6.46E-30	CART	SLC38A9
STAP1	2.32E-34	-2233935759	116	517	6.92E-30	CART	STAP1
UBE3C	2.41E-34	-1701588897	256	722	7.19E-30	CART	UBE3C
FRYL	2.88E-34	-1247720366	475	0.88	8.57E-30	CART	FRYL
ESR2	3.53E-34	-2888586596	41	359	1.05E-29	CART	ESR2
AC010149.1	4.59E-34	-3103647652	33	338	1.37E-29	CART	AC010149.1
MT-ND5	4.65E-34	8371465344	0.99	0.97	1.39E-29	CART	MT-ND5
LIPE-AS1	4.79E-34	-291750656	41	359	1.43E-29	CART	LIPE-AS1
AHCYL2	4.92E-34	-2587254896	76	436	1.47E-29	CART	AHCYL2
DCAF6	5.33E-34	-1638854673	276	722	1.59E-29	CART	DCAF6
ASAP1	5.45E-34	-1750757985	231	688	1.62E-29	CART	ASAP1
METTL15	5.47E-34	-2038428538	231	658	1.63E-29	CART	METTL15
RAP1GDS1	5.86E-34	-1585019858	304	752	1.75E-29	CART	RAP1GDS1
VPS54	6.59E-34	-1855299734	221	662	1.96E-29	CART	VPS54
CRACR2A	6.82E-34	-2167568354	0.13	538	2.03E-29	CART	CRACR2A
AEBP2	7.34E-34	-1503996673	406	825	2.19E-29	CART	AEBP2
NCK2	7.46E-34	-1462950869	307	778	2.22E-29	CART	NCK2
RPL9	8.56E-34	6610104791	982	953	2.55E-29	CART	RPL9
PSPC1	8.58E-34	-1384118849	384	0.85	2.56E-29	CART	PSPC1
USP3	9.65E-34	-1284980242	554	906	2.88E-29	CART	USP3
TCF7	9.77E-34	-2213178804	132	534	2.91E-29	CART	TCF7
ATR	9.98E-34	-1726181679	211	662	2.97E-29	CART	ATR
TGFBR2	1.15E-33	-1327057666	569	919	3.42E-29	CART	TGFBR2
AC104806.2	1.19E-33	-2904042488	48	368	3.55E-29	CART	AC104806.2
TFCP2	1.46E-33	-1823137006	0.21	654	4.36E-29	CART	TFCP2
UMAD1	1.71E-33	-2022245772	208	0.65	5.11E-29	CART	UMAD1
FXYD5	1.90E-33	9433025418	967	932	5.65E-29	CART	FXYD5
SKAP1-AS1	2.12E-33	-2890182668	59	393	6.32E-29	CART	SKAP1-AS1
NMT2	2.33E-33	-1725057953	216	658	6.95E-29	CART	NMT2
BTF3	2.42E-33	8377985618	0.97	949	7.22E-29	CART	BTF3
MCM9	2.69E-33	-2455895697	111	491	8.03E-29	CART	MCM9
AAK1	3.64E-33	-9625703113	734	962	1.09E-28	CART	AAK1
SBF2	3.68E-33	-2523177436	104	474	1.10E-28	CART	SBF2
YWHAB	4.06E-33	9815230084	965	957	1.21E-28	CART	YWHAB
GRK5	4.21E-33	-1932322619	172	598	1.25E-28	CART	GRK5
RAB3GAP1	4.24E-33	-1527016813	439	846	1.26E-28	CART	RAB3GAP1
KSR1	4.35E-33	-2672121639	51	0.38	1.30E-28	CART	KSR1
YBX1	4.45E-33	9049372166	964	927	1.33E-28	CART	YBX1
UBAP1	4.67E-33	-1756849013	219	662	1.39E-28	CART	UBAP1
NIPBL	5.10E-33	-1115487531	688	953	1.52E-28	CART	NIPBL
FNDC3B	5.18E-33	-2082120231	137	547	1.54E-28	CART	FNDC3B
CHCHD3	5.25E-33	-1765691822	233	667	1.56E-28	CART	CHCHD3
GLMN	6.72E-33	-1518063828	312	739	2.00E-28	CART	GLMN
TLDC1	7.83E-33	-2221271269	92	462	2.33E-28	CART	TLDC1
TRIM22	8.25E-33	-1311661394	421	872	2.46E-28	CART	TRIM22
PDS5A	9.90E-33	-1331360183	497	0.88	2.95E-28	CART	PDS5A
TOMM7	1.14E-32	8524953976	965	944	3.40E-28	CART	TOMM7
MEF2A	1.17E-32	-152716194	317	765	3.50E-28	CART	MEF2A
GMFG	1.32E-32	9140544474	0.96	927	3.92E-28	CART	GMFG
VPS13D	1.34E-32	-1598340887	267	709	3.98E-28	CART	VPS13D
YTHDF3	1.38E-32	-16281906	241	705	4.12E-28	CART	YTHDF3
TET3	1.44E-32	-213567813	78	432	4.28E-28	CART	TET3
SP140L	1.59E-32	-1168766218	483	906	4.75E-28	CART	SP140L
MYO1D	1.62E-32	-2603207031	101	462	4.83E-28	CART	MYO1D
RPL12	1.66E-32	733193353	977	966	4.96E-28	CART	RPL12
ATM	1.68E-32	-1123564906	716	962	5.02E-28	CART	ATM
AC026202.2	1.85E-32	-3845925106	0.02	286	5.52E-28	CART	AC026202.2
AC026347.1	1.88E-32	-3186876829	23	299	5.61E-28	CART	AC026347.1
RPS26	1.89E-32	585618285	0.98	962	5.62E-28	CART	RPS26
ZDHHC14	1.92E-32	-2608685063	112	491	5.73E-28	CART	ZDHHC14
ZSWIM6	2.08E-32	-2066383176	142	538	6.20E-28	CART	ZSWIM6
SERF2	2.33E-32	6626575177	979	0.97	6.93E-28	CART	SERF2
HECTD4	2.46E-32	-1558054304	249	697	7.34E-28	CART	HECTD4
RPL32	2.78E-32	6353241459	0.98	974	8.30E-28	CART	RPL32
AC009554.1	2.94E-32	-4028478827	21	291	8.77E-28	CART	AC009554.1
SP110	3.19E-32	-1191822979	616	923	9.52E-28	CART	SP110
EPC1	3.32E-32	-1144602374	601	0.94	9.90E-28	CART	EPC1
GPR89B	3.38E-32	-2524297744	71	415	1.01E-27	CART	GPR89B
LMTK2	3.59E-32	-2289057929	71	419	1.07E-27	CART	LMTK2
EYA3	3.72E-32	-1739950807	182	624	1.11E-27	CART	EYA3
MAP2K4	4.20E-32	-1576472557	246	684	1.25E-27	CART	MAP2K4
GSE1	4.58E-32	-2365595026	64	406	1.36E-27	CART	GSE1
TYW1	4.60E-32	-2048520721	155	564	1.37E-27	CART	TYW1
COX4I1	4.91E-32	8054123869	967	953	1.46E-27	CART	COX4I1
SENP5	5.14E-32	-1715870786	262	701	1.53E-27	CART	SENP5
SIPA1L3	5.33E-32	-2444415506	61	393	1.59E-27	CART	SIPA1L3
CCM2	5.37E-32	-1285173002	584	906	1.60E-27	CART	CCM2
NME7	5.49E-32	-1459125178	299	761	1.64E-27	CART	NME7
NFAT5	5.50E-32	-136823849	487	872	1.64E-27	CART	NFAT5
ZRANB3	5.72E-32	-2660023359	53	372	1.70E-27	CART	ZRANB3
CTSH	5.73E-32	3074828904	581	171	1.71E-27	CART	CTSH
HMBOX1	5.94E-32	-1918436133	0.2	624	1.77E-27	CART	HMBOX1
DAPK2	6.08E-32	-1929345174	244	662	1.81E-27	CART	DAPK2
SPOCK2	6.63E-32	1066977471	965	944	1.98E-27	CART	SPOCK2
ENTPD1-AS1	7.14E-32	-2422319227	132	517	2.13E-27	CART	ENTPD1-AS1
ITGAX	7.34E-32	-2406951638	64	402	2.19E-27	CART	ITGAX
TRPM7	7.50E-32	-1217593142	417	863	2.23E-27	CART	TRPM7
RPL30	8.61E-32	5495701473	983	979	2.57E-27	CART	RPL30
THADA	9.40E-32	-1704274035	0.2	645	2.80E-27	CART	THADA
DIS3L2	9.67E-32	-1656454574	157	577	2.88E-27	CART	DIS3L2
LIN54	1.19E-31	-2048636585	142	538	3.55E-27	CART	LIN54
CCND3	1.30E-31	-1330842912	459	0.88	3.88E-27	CART	CCND3
PGAP1	1.49E-31	-1724633149	224	658	4.43E-27	CART	PGAP1
CD27	1.88E-31	-12665751	219	675	5.62E-27	CART	CD27
LINC02100	2.08E-31	-2503651679	0.04	338	6.19E-27	CART	LINC02100
TBL1X	2.15E-31	-1438446607	411	833	6.41E-27	CART	TBL1X
DHRSX	2.48E-31	-1481647464	216	654	7.38E-27	CART	DHRSX
RIPOR2	2.67E-31	-1183140838	759	0.97	7.94E-27	CART	RIPOR2
HINT1	2.80E-31	7610136565	972	966	8.35E-27	CART	HINT1
SAP30L-AS1	3.01E-31	-3357075281	18	278	8.96E-27	CART	SAP30L-AS1
GATAD2A	3.11E-31	-1488963426	295	756	9.26E-27	CART	GATAD2A
GLG1	3.27E-31	-121713018	525	868	9.75E-27	CART	GLG1
AC010275.1	3.54E-31	-4286283255	0.01	248	1.05E-26	CART	AC010275.1
RASSF3	3.84E-31	-1611297107	0.33	782	1.14E-26	CART	RASSF3
RPS11	3.99E-31	6079435095	977	979	1.19E-26	CART	RPS11
ERP27	4.32E-31	-3145030348	41	338	1.29E-26	CART	ERP27
MLLT10	4.92E-31	-1477125154	0.35	778	1.47E-26	CART	MLLT10
RBL2	5.15E-31	-1128425725	693	966	1.53E-26	CART	RBL2
CNOT2	5.23E-31	-1204491955	495	872	1.56E-26	CART	CNOT2
ZMYM4	5.39E-31	-1493917418	353	795	1.61E-26	CART	ZMYM4
ZNF862	5.68E-31	-227719388	79	427	1.69E-26	CART	ZNF862
AL683807.1	5.75E-31	-2211297843	41	342	1.71E-26	CART	AL683807.1
AC091057.6	6.04E-31	-333653807	51	355	1.80E-26	CART	AC091057.6
RPS15	7.60E-31	5606506362	983	0.97	2.26E-26	CART	RPS15
AC068724.3	8.98E-31	-3236734429	18	274	2.68E-26	CART	AC068724.3
KDM2A	9.32E-31	-1271308651	447	0.85	2.78E-26	CART	KDM2A
RPSA	9.34E-31	7251468851	975	974	2.78E-26	CART	RPSA
FBXW8	9.48E-31	-1950660565	78	423	2.82E-26	CART	FBXW8
ADGRG5	9.88E-31	-2697760831	58	372	2.94E-26	CART	ADGRG5
LINC00513	1.29E-30	-1796473198	0.18	585	3.85E-26	CART	LINC00513
KLHL20	1.36E-30	-1547045119	193	624	4.06E-26	CART	KLHL20
EID1	1.43E-30	126499254	871	748	4.25E-26	CART	EID1
MAN1C1	1.61E-30	-2076522888	74	415	4.78E-26	CART	MAN1C1
MTMR3	1.62E-30	-1819184474	145	538	4.84E-26	CART	MTMR3
AL031428.1	1.66E-30	-4127106959	17	265	4.95E-26	CART	AL031428.1
TMSB4X	1.70E-30	5028895594	988	987	5.06E-26	CART	TMSB4X
PREX1	2.12E-30	-1264459994	411	821	6.31E-26	CART	PREX1
RERE	2.26E-30	-1567389061	328	744	6.74E-26	CART	RERE
TBC1D32	2.34E-30	-2751965229	64	0.38	6.98E-26	CART	TBC1D32
CDK6	2.60E-30	-1327196746	558	0.91	7.74E-26	CART	CDK6
ZNF451-AS1	2.91E-30	-2874084873	41	333	8.68E-26	CART	ZNF451-AS1
TSPAN5	2.93E-30	-1865088438	244	662	8.73E-26	CART	TSPAN5
ST8SIA6	3.94E-30	-4722206772	0.01	239	1.17E-25	CART	ST8SIA6
SLC39A10	3.95E-30	-1554378227	338	756	1.18E-25	CART	SLC39A10
PPP1R21	4.01E-30	-1605680766	246	671	1.19E-25	CART	PPP1R21
ELP4	4.11E-30	-1944059341	234	628	1.23E-25	CART	ELP4
IQGAP2	5.07E-30	-1089046464	705	957	1.51E-25	CART	IQGAP2
RCOR1	5.08E-30	-1855989892	144	547	1.51E-25	CART	RCOR1
RLF	5.12E-30	-1406257162	322	756	1.53E-25	CART	RLF
AL592183.1	5.17E-30	-1955180689	167	568	1.54E-25	CART	AL592183.1
RBMS1	5.55E-30	-1033668337	719	949	1.65E-25	CART	RBMS1
EEF1D	5.80E-30	7548162771	975	962	1.73E-25	CART	EEF1D
ARIH1	6.02E-30	-1399991851	444	855	1.79E-25	CART	ARIH1
SUSD1	6.30E-30	-2493248514	78	415	1.88E-25	CART	SUSD1
NCOA5	6.86E-30	-2163219088	81	423	2.04E-25	CART	NCOA5
ARFGEF1	6.96E-30	-128550268	497	868	2.07E-25	CART	ARFGEF1
HIVEP2	7.12E-30	-1417965772	378	829	2.12E-25	CART	HIVEP2
R3HCC1L	7.39E-30	-1722474651	226	645	2.20E-25	CART	R3HCC1L
GRK3	7.67E-30	-1886130248	0.16	556	2.29E-25	CART	GRK3
GPATCH8	8.99E-30	-118950503	0.51	889	2.68E-25	CART	GPATCH8
AC079793.1	9.10E-30	-3962437992	12	244	2.71E-25	CART	AC079793.1
ANKRD13C	9.55E-30	-1559629553	224	654	2.85E-25	CART	ANKRD13C
TTC33	9.60E-30	-1882429886	182	598	2.86E-25	CART	TTC33
TANGO6	1.01E-29	-2249180151	84	423	3.00E-25	CART	TANGO6
CDK19	1.03E-29	-1750498545	208	628	3.07E-25	CART	CDK19
RPL27	1.04E-29	587346526	979	974	3.09E-25	CART	RPL27
AL391839.1	1.14E-29	-3922244432	12	244	3.41E-25	CART	AL391839.1
C1QTNF3-AMACR	1.15E-29	-2576747292	33	308	3.41E-25	CART	C1QTNF3-AMACR
AP2B1	1.16E-29	-1362447605	356	791	3.45E-25	CART	AP2B1
SLA2	1.35E-29	-1308780178	363	825	4.02E-25	CART	SLA2
UBE4B	1.36E-29	-1812702471	165	564	4.07E-25	CART	UBE4B
ZC4H2	1.41E-29	-2519339577	48	346	4.21E-25	CART	ZC4H2
LIN52	1.58E-29	-2010543483	68	393	4.71E-25	CART	LIN52
PELI1	1.62E-29	-1826593025	172	581	4.82E-25	CART	PELI1
LPGAT1	1.64E-29	-1467804554	307	735	4.88E-25	CART	LPGAT1
STAG2	1.67E-29	-9944996937	675	949	4.99E-25	CART	STAG2
PCGF5	1.70E-29	-1361511232	386	812	5.07E-25	CART	PCGF5
NDUFAF6	1.90E-29	-1496091916	0.14	534	5.65E-25	CART	NDUFAF6
CDKN2A	2.01E-29	-1536764665	264	688	5.99E-25	CART	CDKN2A
DENND5A	2.33E-29	-2823182148	61	368	6.95E-25	CART	DENND5A
TNRC6C	2.55E-29	-1479285584	282	718	7.61E-25	CART	TNRC6C
MCPH1	2.65E-29	-155570339	305	726	7.89E-25	CART	MCPH1
SMURF1	2.78E-29	-1967232225	119	491	8.28E-25	CART	SMURF1
MAGED1	2.89E-29	-2191757725	139	513	8.62E-25	CART	MAGED1
AC090627.1	3.13E-29	-2730233178	45	333	9.33E-25	CART	AC090627.1
SIK2	3.16E-29	-2186914436	83	423	9.41E-25	CART	SIK2
AFF1	3.19E-29	-1504648673	384	799	9.50E-25	CART	AFF1
SLC4A8	3.24E-29	-2748322212	41	325	9.66E-25	CART	SLC4A8
SRGAP3	3.31E-29	-2441865739	97	444	9.86E-25	CART	SRGAP3
AC124312.1	3.77E-29	-2548271751	53	0.35	1.12E-24	CART	AC124312.1
PTPRK	3.87E-29	-2720947224	89	419	1.15E-24	CART	PTPRK
RPS6KA5	3.96E-29	-1417857872	528	872	1.18E-24	CART	RPS6KA5
RAB27A	4.07E-29	-1166579356	0.53	906	1.21E-24	CART	RAB27A
AC010976.1	4.12E-29	-4696675067	7	222	1.23E-24	CART	AC010976.1
AL161725.1	4.81E-29	-3696221114	17	256	1.43E-24	CART	AL161725.1
SACM1L	4.91E-29	-122508822	475	868	1.46E-24	CART	SACM1L
IKZF2	5.12E-29	-2983120513	91	419	1.53E-24	CART	IKZF2
NEK10	5.17E-29	-2754787087	28	291	1.54E-24	CART	NEK10
PRKAR1B	6.14E-29	-2165568984	92	436	1.83E-24	CART	PRKAR1B
PKN2	6.48E-29	-1382779239	343	774	1.93E-24	CART	PKN2
MED12L	6.96E-29	-3075687787	36	312	2.07E-24	CART	MED12L
TRAK1	7.23E-29	-2324717711	87	423	2.15E-24	CART	TRAK1
DCTN4	7.54E-29	-159263868	162	0.56	2.25E-24	CART	DCTN4
FAM214A	9.27E-29	-1456585895	388	791	2.76E-24	CART	FAM214A
XPO4	9.38E-29	-1886677161	201	598	2.79E-24	CART	XPO4
RALA	1.06E-28	-1182857321	606	932	3.14E-24	CART	RALA
PPP1R12B	1.14E-28	-1894439426	0.13	0.5	3.41E-24	CART	PPP1R12B
UBA6-AS1	1.16E-28	-1943464983	107	0.47	3.47E-24	CART	UBA6-AS1
GNAI2	1.22E-28	1028248691	917	876	3.64E-24	CART	GNAI2
AC104365.1	1.32E-28	-4192505698	12	235	3.93E-24	CART	AC104365.1
POU2F1	1.42E-28	-1667221661	226	641	4.22E-24	CART	POU2F1
ZNF251	1.43E-28	-2313074674	74	393	4.26E-24	CART	ZNF251
LAPTM5	1.54E-28	9028673075	969	936	4.60E-24	CART	LAPTM5
PDE5A	1.62E-28	-2822310151	45	329	4.83E-24	CART	PDE5A
PPP2R5A	1.75E-28	-1389366234	401	803	5.21E-24	CART	PPP2R5A
PATL2	1.82E-28	-1737771454	224	637	5.43E-24	CART	PATL2
PLEKHA7	2.15E-28	-2575757433	41	321	6.40E-24	CART	PLEKHA7
KIAA1109	2.26E-28	-1252551015	441	846	6.74E-24	CART	KIAA1109
MYO5A	2.31E-28	-1548018341	285	705	6.89E-24	CART	MYO5A
LARP4B	2.32E-28	-1279275848	348	782	6.91E-24	CART	LARP4B
PHC3	2.35E-28	-112810889	0.5	893	7.00E-24	CART	PHC3
KANSL1-AS1	2.61E-28	-2029105536	109	462	7.76E-24	CART	KANSL1-AS1
AL359922.1	2.81E-28	-348582648	21	265	8.36E-24	CART	AL359922.1
TRG-AS1	2.84E-28	-1575246178	398	791	8.47E-24	CART	TRG-AS1
TRAF3	2.90E-28	-1350107851	351	774	8.63E-24	CART	TRAF3
YEATS2	3.03E-28	-1663459861	0.19	594	9.02E-24	CART	YEATS2
SNRK	3.13E-28	-1190228737	0.45	846	9.31E-24	CART	SNRK
TIMD4	3.20E-28	-2818426691	53	346	9.53E-24	CART	TIMD4
UBR2	3.46E-28	-1253630017	488	846	1.03E-23	CART	UBR2
MINDY3	3.58E-28	-1650430252	175	573	1.07E-23	CART	MINDY3
STAU2	3.60E-28	-1565812304	0.35	731	1.07E-23	CART	STAU2
KLRB1	3.74E-28	2931128767	583	218	1.11E-23	CART	KLRB1
AL365273.2	4.11E-28	-2645100269	33	295	1.22E-23	CART	AL365273.2
RSAD2	4.18E-28	-2289652991	66	376	1.24E-23	CART	RSAD2
C11orf65	4.19E-28	-2502862076	54	0.35	1.25E-23	CART	C11orf65
SOD1	4.76E-28	1102775787	911	855	1.42E-23	CART	SOD1
TSPO	5.00E-28	1317843165	832	744	1.49E-23	CART	TSPO
KIF13B	5.03E-28	-1843135434	163	556	1.50E-23	CART	KIF13B
ZNF652	5.40E-28	-1063216632	584	919	1.61E-23	CART	ZNF652
AC011476.3	6.91E-28	-3446483136	28	278	2.06E-23	CART	AC011476.3
EMP3	7.06E-28	1021172047	946	893	2.10E-23	CART	EMP3
SLC20A2	7.22E-28	-1771945396	142	517	2.15E-23	CART	SLC20A2
CD247	7.24E-28	-9678273556	718	957	2.16E-23	CART	CD247
CIRBP	7.59E-28	1101493632	896	842	2.26E-23	CART	CIRBP
MYL6	7.87E-28	6369274752	985	962	2.35E-23	CART	MYL6
TTLL5	8.14E-28	-1694593668	91	432	2.43E-23	CART	TTLL5
MYL12B	8.29E-28	7195063591	967	957	2.47E-23	CART	MYL12B
OVOL2	8.80E-28	-3449355361	25	269	2.62E-23	CART	OVOL2
AC093010.2	9.07E-28	-1996267758	134	496	2.70E-23	CART	AC093010.2
PRIM2	9.10E-28	-1919977163	155	526	2.71E-23	CART	PRIM2
TPST2	1.01E-27	-1527166757	178	598	3.02E-23	CART	TPST2
SETD5	1.08E-27	-1172634525	508	889	3.21E-23	CART	SETD5
CDCP1	1.17E-27	-2937740208	43	316	3.48E-23	CART	CDCP1
DENND6A-AS1	1.25E-27	-3393206296	21	261	3.74E-23	CART	DENND6A-AS1
AL031772.1	1.31E-27	-3284982117	18	252	3.89E-23	CART	AL031772.1
AC009690.1	1.32E-27	-2933770432	0.04	308	3.94E-23	CART	AC009690.1
TRAC	1.42E-27	8984750992	972	957	4.22E-23	CART	TRAC
WDPCP	1.65E-27	-24349224	71	376	4.92E-23	CART	WDPCP
DDX3Y	1.66E-27	7227003917	0.38	0	4.95E-23	CART	DDX3Y
AL139807.1	1.81E-27	-3767404449	18	248	5.39E-23	CART	AL139807.1
ZNF644	1.94E-27	-1108696562	497	876	5.79E-23	CART	ZNF644
GNPTAB	1.94E-27	-1290548866	457	829	5.79E-23	CART	GNPTAB
NUP214	1.97E-27	-1555022732	182	0.59	5.88E-23	CART	NUP214
ZNF654	1.98E-27	-1604936922	238	645	5.90E-23	CART	ZNF654
MED13	2.01E-27	-125549705	0.45	825	5.99E-23	CART	MED13
HLA-DPA1	2.05E-27	2065266943	682	389	6.11E-23	CART	HLA-DPA1
AC022075.1	2.10E-27	-2913525186	38	303	6.27E-23	CART	AC022075.1
GTDC1	2.16E-27	-1895270398	246	0.62	6.45E-23	CART	GTDC1
FBXO42	2.29E-27	-1785887528	175	564	6.82E-23	CART	FBXO42
PRDX1	2.44E-27	1196839427	851	761	7.28E-23	CART	PRDX1
ERBIN	2.45E-27	-1091498621	569	893	7.31E-23	CART	ERBIN
AL355076.2	2.53E-27	-3124996151	0.03	282	7.53E-23	CART	AL355076.2
EIF2AK3	2.54E-27	-2112309662	104	0.44	7.55E-23	CART	EIF2AK3
EPC2	2.58E-27	-1394266925	243	658	7.68E-23	CART	EPC2
TRPC4AP	3.14E-27	-1326517161	267	684	9.34E-23	CART	TRPC4AP
AP002336.2	3.22E-27	-4162276907	13	231	9.58E-23	CART	AP002336.2
CNNM2	3.24E-27	-2402445361	76	389	9.64E-23	CART	CNNM2
RPS6	3.30E-27	6372784868	985	0.97	9.83E-23	CART	RPS6
TMEM156	3.45E-27	-1335450988	411	799	1.03E-22	CART	TMEM156
AP000787.1	3.53E-27	-2626427543	87	402	1.05E-22	CART	AP000787.1
DMXL1	3.58E-27	-1575780904	226	628	1.07E-22	CART	DMXL1
ABL1	3.59E-27	-2175054139	102	432	1.07E-22	CART	ABL1
PLCG2	3.69E-27	-2405049755	109	0.44	1.10E-22	CART	PLCG2
ATF7IP	4.29E-27	-1037738558	627	919	1.28E-22	CART	ATF7IP
SIRPG	4.38E-27	-156487843	0.18	568	1.31E-22	CART	SIRPG
FLI1	4.42E-27	-1172921156	447	863	1.32E-22	CART	FLI1
RNF144A	4.52E-27	-2578440634	48	325	1.35E-22	CART	RNF144A
MTM1	5.06E-27	-1382870512	219	637	1.51E-22	CART	MTM1
MYO9B	5.23E-27	-1248133662	394	808	1.56E-22	CART	MYO9B
PPA2	5.57E-27	-1503875461	318	739	1.66E-22	CART	PPA2
XCL1	5.62E-27	-310400151	46	316	1.67E-22	CART	XCL1
NFE2L2	5.73E-27	-1186060518	479	863	1.71E-22	CART	NFE2L2
AL138752.2	5.77E-27	-2410180395	41	312	1.72E-22	CART	AL138752.2
ZNF600	5.84E-27	-1850786613	56	355	1.74E-22	CART	ZNF600
KDM2B	5.91E-27	-174164924	0.16	547	1.76E-22	CART	KDM2B
FGD3	6.87E-27	-1242830758	409	821	2.05E-22	CART	FGD3
AC023389.1	7.23E-27	-4424227185	0.01	218	2.15E-22	CART	AC023389.1
SEMA4D	7.87E-27	-1123503863	459	897	2.34E-22	CART	SEMA4D
CEP192	7.94E-27	-1415901489	262	692	2.37E-22	CART	CEP192
CD7	8.27E-27	-901403392	0.68	953	2.46E-22	CART	CD7
NUP153	8.72E-27	-1282460512	0.32	761	2.60E-22	CART	NUP153
MAP3K8	9.13E-27	-1369979618	193	594	2.72E-22	CART	MAP3K8
AC079594.2	9.20E-27	-3870033446	17	239	2.74E-22	CART	AC079594.2
TAF1	9.37E-27	-1294958114	195	611	2.79E-22	CART	TAF1
HLA-C	9.92E-27	6174857615	0.99	979	2.96E-22	CART	HLA-C
NPM1	9.96E-27	7156787823	979	953	2.97E-22	CART	NPM1
AC009126.1	1.07E-26	-2846096519	0.04	303	3.20E-22	CART	AC009126.1
BTRC	1.08E-26	-1755154291	0.17	551	3.21E-22	CART	BTRC
CCDC7	1.10E-26	-1876756458	0.15	504	3.27E-22	CART	CCDC7
HLCS	1.21E-26	-2121917369	106	0.44	3.62E-22	CART	HLCS
C20orf194	1.23E-26	-2235072345	86	402	3.65E-22	CART	C20orf194
SELENOO	1.25E-26	-1975278389	56	0.35	3.73E-22	CART	SELENOO
SPAG1	1.30E-26	-2087702538	112	457	3.89E-22	CART	SPAG1
FAM19A1	1.37E-26	-2683501925	36	295	4.08E-22	CART	FAM19A1
RNF145	1.40E-26	-1285490516	417	808	4.17E-22	CART	RNF145
HECW2	1.41E-26	-2434982658	36	299	4.21E-22	CART	HECW2
ADNP	1.42E-26	-1321758903	0.35	744	4.24E-22	CART	ADNP
SCMH1	1.42E-26	-2621374474	78	376	4.24E-22	CART	SCMH1
ZNF490	1.43E-26	-2254556003	66	368	4.27E-22	CART	ZNF490
ARNT	1.44E-26	-1628770097	195	0.59	4.28E-22	CART	ARNT
VAV3	1.52E-26	-3095783001	0.04	299	4.52E-22	CART	VAV3
BICD1	1.52E-26	-1994657747	139	491	4.53E-22	CART	BICD1
FHIT	1.72E-26	-2490327166	102	423	5.13E-22	CART	FHIT
PPM1B	1.72E-26	-129487516	373	799	5.13E-22	CART	PPM1B
STAMBPL1	1.76E-26	-1789426202	177	564	5.24E-22	CART	STAMBPL1
AC244131.2	1.80E-26	-2760829268	31	282	5.37E-22	CART	AC244131.2
TBC1D1	1.88E-26	-1563456746	271	662	5.60E-22	CART	TBC1D1
RAPGEF2	1.91E-26	-1890164167	256	637	5.70E-22	CART	RAPGEF2
RREB1	2.00E-26	-1530560395	193	0.59	5.95E-22	CART	RREB1
RPLP2	2.04E-26	496258936	983	962	6.09E-22	CART	RPLP2
LINC02446	2.05E-26	-2083898272	102	432	6.11E-22	CART	LINC02446
MTRNR2L1	2.14E-26	1177425009	847	735	6.38E-22	CART	MTRNR2L1
HTT	2.21E-26	-1532094609	221	632	6.59E-22	CART	HTT
SUCLG2-AS1	2.50E-26	-236924093	56	338	7.44E-22	CART	SUCLG2-AS1
ACAP2	2.67E-26	-1066548625	612	915	7.95E-22	CART	ACAP2
CXCR4	2.90E-26	1316533114	924	855	8.65E-22	CART	CXCR4
SUSD6	3.13E-26	-1458954788	282	684	9.32E-22	CART	SUSD6
GML	3.15E-26	-307568894	28	269	9.38E-22	CART	GML
SLC38A1	3.15E-26	-8907102919	797	957	9.39E-22	CART	SLC38A1
STAM	3.20E-26	-1304498168	0.38	774	9.53E-22	CART	STAM
SP3	3.23E-26	-1260713561	436	825	9.62E-22	CART	SP3
EHBP1	3.35E-26	-2318871706	116	444	9.98E-22	CART	EHBP1
ZFX	3.71E-26	-1198984878	403	799	1.11E-21	CART	ZFX
R3HDM2	4.42E-26	-1196849801	512	855	1.32E-21	CART	R3HDM2
TBL1XR1	4.83E-26	-85911867	797	949	1.44E-21	CART	TBL1XR1
S100Z	5.34E-26	-282576758	53	329	1.59E-21	CART	S100Z
ITGAL	5.37E-26	-1272215332	429	812	1.60E-21	CART	ITGAL
MPZL3	6.14E-26	-1677631423	198	585	1.83E-21	CART	MPZL3
PDE4A	6.69E-26	-1402163161	257	667	1.99E-21	CART	PDE4A
FAM19A2	6.75E-26	-2811199553	28	269	2.01E-21	CART	FAM19A2
CYFIP2	6.87E-26	-1083819156	497	855	2.05E-21	CART	CYFIP2
SMG7	6.97E-26	-1498179572	0.3	697	2.08E-21	CART	SMG7
NDUFB10	7.16E-26	1131905126	863	778	2.13E-21	CART	NDUFB10
KANSL1L	7.22E-26	-2540142513	66	355	2.15E-21	CART	KANSL1L
AC109587.1	7.25E-26	-3207161108	0.02	244	2.16E-21	CART	AC109587.1
MAN2A1	7.34E-26	-1434854723	226	624	2.19E-21	CART	MAN2A1
NFATC2	7.54E-26	-1221483465	413	812	2.25E-21	CART	NFATC2
SERPINB9P1	7.97E-26	-2459162979	28	269	2.37E-21	CART	SERPINB9P1
RPRD2	8.00E-26	-1544135081	327	726	2.38E-21	CART	RPRD2
KAT6A	8.18E-26	-1087014494	591	936	2.44E-21	CART	KAT6A
ZHX3	8.23E-26	-2384329029	0.05	321	2.45E-21	CART	ZHX3
NAP1L4	8.39E-26	-8507388793	789	974	2.50E-21	CART	NAP1L4
ABRACL	8.50E-26	1135207652	865	812	2.53E-21	CART	ABRACL
NSF	8.78E-26	-1293691978	274	714	2.62E-21	CART	NSF
AL021707.1	8.93E-26	-3742051064	13	222	2.66E-21	CART	AL021707.1
TMEM173	8.95E-26	2350098153	599	282	2.67E-21	CART	TMEM173
AC090772.2	9.25E-26	-2780134915	31	278	2.76E-21	CART	AC090772.2
AC074032.1	9.46E-26	-1814971741	139	0.5	2.82E-21	CART	AC074032.1
P2RY8	9.55E-26	-1524532445	384	782	2.84E-21	CART	P2RY8
RAN	9.60E-26	1094022675	886	829	2.86E-21	CART	RAN
FAM208B	9.77E-26	-1361963204	355	765	2.91E-21	CART	FAM208B
LRRC37A2	1.04E-25	-2409962787	51	325	3.09E-21	CART	LRRC37A2
GABPB1	1.23E-25	-1446324055	236	0.65	3.68E-21	CART	GABPB1
LARS2	1.52E-25	-2348007125	58	338	4.52E-21	CART	LARS2
CUL5	1.56E-25	-1219833195	314	748	4.64E-21	CART	CUL5
CDYL2	1.59E-25	-1824579255	99	423	4.74E-21	CART	CDYL2
AKT3	1.72E-25	-1470223109	409	769	5.14E-21	CART	AKT3
SPG11	1.74E-25	-1288067125	0.37	748	5.18E-21	CART	SPG11
CXCR6	1.77E-25	2321578635	662	0.38	5.27E-21	CART	CXCR6
ZNF429	1.77E-25	-2609409563	45	308	5.28E-21	CART	ZNF429
LIMS1	1.78E-25	1502282487	827	709	5.30E-21	CART	LIMS1
WDR20	1.80E-25	-1421906782	198	594	5.35E-21	CART	WDR20
RNF138	1.82E-25	-1624253384	0.21	603	5.42E-21	CART	RNF138
POC1B	1.86E-25	-142970985	322	739	5.55E-21	CART	POC1B
HLA-DRB1	2.07E-25	2263877864	663	415	6.17E-21	CART	HLA-DRB1
PSMA1	2.11E-25	-1051501596	789	962	6.27E-21	CART	PSMA1
EEF2	2.11E-25	99365011	903	0.91	6.29E-21	CART	EEF2
TNFRSF18	2.12E-25	2183858003	609	261	6.31E-21	CART	TNFRSF18
CALCB	2.17E-25	-2928280773	26	261	6.46E-21	CART	CALCB
AC015849.1	2.21E-25	-2901585892	36	286	6.59E-21	CART	AC015849.1
ZNF235	2.32E-25	-2596669655	63	342	6.92E-21	CART	ZNF235
CBFB	2.41E-25	-142873625	401	786	7.19E-21	CART	CBFB
KAT6B	2.42E-25	-1458527577	348	744	7.22E-21	CART	KAT6B
SLC9A9	2.48E-25	-1870406738	198	551	7.39E-21	CART	SLC9A9
MTMR1	2.51E-25	-1618531009	0.13	474	7.47E-21	CART	MTMR1
BPTF	2.95E-25	-851462008	795	0.97	8.80E-21	CART	BPTF
FOXN2	2.99E-25	-1387752746	284	701	8.92E-21	CART	FOXN2
LINC00623	3.12E-25	-1258004888	363	765	9.28E-21	CART	LINC00623
C11orf49	3.17E-25	-1847533777	0.14	487	9.46E-21	CART	C11orf49
RPS18	3.30E-25	5732446969	0.99	979	9.84E-21	CART	RPS18
USP32	3.60E-25	-1830695556	175	534	1.07E-20	CART	USP32
AVL9	3.71E-25	-1611030333	0.21	0.59	1.11E-20	CART	AVL9
MATK	3.85E-25	-2150194524	66	355	1.15E-20	CART	MATK
KCNQ5	3.87E-25	-3079319159	28	261	1.15E-20	CART	KCNQ5
RPS15A	3.92E-25	4779787157	983	979	1.17E-20	CART	RPS15A
PBX4	3.99E-25	-1470678444	167	547	1.19E-20	CART	PBX4
EFL1	4.22E-25	-1913266988	145	491	1.26E-20	CART	EFL1
PRPF40B	4.46E-25	-2261425415	59	338	1.33E-20	CART	PRPF40B
MAST4	4.58E-25	-1299833438	477	838	1.36E-20	CART	MAST4
AC022916.1	4.98E-25	-261703862	59	333	1.48E-20	CART	AC022916.1
AC009093.2	5.47E-25	-2086810702	56	329	1.63E-20	CART	AC009093.2
CBFA2T2	5.68E-25	-1546500625	248	654	1.69E-20	CART	CBFA2T2
TNPO3	5.71E-25	-1389765487	236	632	1.70E-20	CART	TNPO3
AC079447.1	5.77E-25	-2961840446	0.03	265	1.72E-20	CART	AC079447.1
BBS9	5.82E-25	-2452517713	0.05	312	1.73E-20	CART	BBS9
SMC1B	6.28E-25	-3590072689	15	222	1.87E-20	CART	SMC1B
MSH3	6.34E-25	-1529141692	274	658	1.89E-20	CART	MSH3
CIB1	6.70E-25	9162321284	929	885	2.00E-20	CART	CIB1
TNC	7.03E-25	-2601121334	51	316	2.09E-20	CART	TNC
TYW1B	8.36E-25	-2740484476	45	299	2.49E-20	CART	TYW1B
TG	8.55E-25	-3379567697	17	226	2.55E-20	CART	TG
ADAMTS17	8.80E-25	-4224397942	13	214	2.62E-20	CART	ADAMTS17
NR2C2	9.12E-25	-1566374876	252	654	2.72E-20	CART	NR2C2
SLC25A12	9.26E-25	-1560515402	185	0.56	2.76E-20	CART	SLC25A12
LCORL	1.06E-24	-1383177038	238	632	3.16E-20	CART	LCORL
TTC7A	1.19E-24	-1503084102	215	598	3.54E-20	CART	TTC7A
GALNT10	1.21E-24	-1439366144	358	756	3.59E-20	CART	GALNT10
HEATR5B	1.28E-24	-1784916063	0.17	526	3.80E-20	CART	HEATR5B
SMCHD1	1.32E-24	-7986139714	815	966	3.93E-20	CART	SMCHD1
PLXNC1	1.43E-24	-1492096055	221	611	4.26E-20	CART	PLXNC1
PIGN	1.46E-24	-1662662132	167	526	4.36E-20	CART	PIGN
NR3C1	1.48E-24	-1035884766	691	932	4.40E-20	CART	NR3C1
HS2ST1	1.50E-24	-2077322535	122	449	4.48E-20	CART	HS2ST1
TPT1	1.52E-24	4848943942	987	991	4.53E-20	CART	TPT1
SDCCAG8	1.73E-24	-1408890032	0.31	692	5.15E-20	CART	SDCCAG8
TRIM5	1.84E-24	-1470438517	188	564	5.49E-20	CART	TRIM5
STARD9	2.12E-24	-1937413415	92	402	6.32E-20	CART	STARD9
NBPF19	2.19E-24	-1532270779	139	496	6.54E-20	CART	NBPF19
CRADD	2.21E-24	-2130698042	125	449	6.59E-20	CART	CRADD
CD19	2.24E-24	748471857	343	0	6.67E-20	CART	CD19
ABHD17B	2.39E-24	-1826956562	0.15	496	7.12E-20	CART	ABHD17B
UBAP2	2.42E-24	-1552031386	234	0.62	7.21E-20	CART	UBAP2
SP140	2.59E-24	-1404816143	487	799	7.71E-20	CART	SP140
SNX4	2.68E-24	-1635957842	185	556	7.98E-20	CART	SNX4
WDR37	2.73E-24	-1520511549	172	538	8.14E-20	CART	WDR37
AC104316.1	2.73E-24	-3341774309	0.02	231	8.14E-20	CART	AC104316.1
ANKMY1	2.85E-24	-2067960068	81	0.38	8.48E-20	CART	ANKMY1
CWF19L2	3.46E-24	-1535028198	251	641	1.03E-19	CART	CWF19L2
GGA2	3.60E-24	-1054589454	373	782	1.07E-19	CART	GGA2
FBXW4	3.72E-24	-1393172698	183	564	1.11E-19	CART	FBXW4
KIF9-AS1	3.77E-24	-2706948596	45	295	1.12E-19	CART	KIF9-AS1
ABI1	3.78E-24	-1114670712	546	889	1.13E-19	CART	ABI1
JUNB	3.78E-24	192810713	713	457	1.13E-19	CART	JUNB
FBXO34	3.87E-24	-1295081056	323	735	1.15E-19	CART	FBXO34
SLX4IP	3.94E-24	-1806684747	117	444	1.17E-19	CART	SLX4IP
AP005899.1	4.35E-24	-2478620539	38	282	1.29E-19	CART	AP005899.1
ASTN2	4.40E-24	-2623840116	45	295	1.31E-19	CART	ASTN2
TLK1	4.42E-24	-9552095129	627	919	1.32E-19	CART	TLK1
NLRC3	4.49E-24	-9700359321	391	846	1.34E-19	CART	NLRC3
FAM222B	4.51E-24	-138854402	0.18	547	1.34E-19	CART	FAM222B
MYL12A	4.83E-24	6053056134	975	0.97	1.44E-19	CART	MYL12A
SGCE	5.00E-24	-3009551294	28	252	1.49E-19	CART	SGCE
CYTH1	5.01E-24	-999256912	0.62	927	1.49E-19	CART	CYTH1
RAB3GAP2	5.35E-24	-1194042764	342	756	1.59E-19	CART	RAB3GAP2
KLHL5	5.45E-24	-1334499537	366	765	1.62E-19	CART	KLHL5
UBA52	5.47E-24	4734899996	982	966	1.63E-19	CART	UBA52
BMP2K	5.50E-24	-1710617326	139	474	1.64E-19	CART	BMP2K
KDSR	5.84E-24	2033439749	634	342	1.74E-19	CART	KDSR
AC090825.1	5.96E-24	-2804773081	28	252	1.78E-19	CART	AC090825.1
LRMP	6.16E-24	-1355038568	191	568	1.84E-19	CART	LRMP
DNHD1	6.26E-24	-264601265	38	278	1.86E-19	CART	DNHD1
GPD2	6.79E-24	-2222173711	94	393	2.02E-19	CART	GPD2
ZNF81	6.90E-24	-2473182794	38	278	2.05E-19	CART	ZNF81
RPL34-AS1	7.45E-24	-3633307676	17	218	2.22E-19	CART	RPL34-AS1
RAP1A	7.75E-24	-8267600861	827	962	2.31E-19	CART	RAP1A
CHIC2	7.96E-24	-1141532654	391	812	2.37E-19	CART	CHIC2
CD226	7.96E-24	-1296982718	0.5	825	2.37E-19	CART	CD226
LGALS3	8.57E-24	1102536983	875	846	2.55E-19	CART	LGALS3
VPS39	8.74E-24	-1830939004	124	457	2.61E-19	CART	VPS39
PRKX-AS1	8.78E-24	-2746218112	26	248	2.62E-19	CART	PRKX-AS1
AP4E1	9.41E-24	-175417705	107	432	2.80E-19	CART	AP4E1
PIGB	9.97E-24	-1752294955	116	444	2.97E-19	CART	PIGB
ACVR1	1.01E-23	-167115394	142	487	3.01E-19	CART	ACVR1
SCFD1	1.03E-23	-1170412931	424	786	3.08E-19	CART	SCFD1
BTBD10	1.03E-23	-1457346669	191	564	3.08E-19	CART	BTBD10
ARHGAP25	1.06E-23	-1203601499	487	821	3.17E-19	CART	ARHGAP25
WDR44	1.16E-23	-158686972	147	496	3.44E-19	CART	WDR44
ATE1	1.19E-23	-1388016277	309	697	3.55E-19	CART	ATE1
ERCC6L2	1.22E-23	-1634130592	236	615	3.63E-19	CART	ERCC6L2
AC124319.2	1.36E-23	-2162340501	71	355	4.05E-19	CART	AC124319.2
MTREX	1.39E-23	-1340822556	272	667	4.14E-19	CART	MTREX
TBC1D31	1.40E-23	-1290798696	0.2	585	4.17E-19	CART	TBC1D31
PIK3C2A	1.40E-23	-1384448873	195	577	4.18E-19	CART	PIK3C2A
ANXA5	1.51E-23	1069772304	865	0.85	4.50E-19	CART	ANXA5
SLC35F5	1.55E-23	-1703227213	155	504	4.62E-19	CART	SLC35F5
RCC1	1.72E-23	-1699027948	112	432	5.12E-19	CART	RCC1
PIGL	1.74E-23	-1730305206	125	457	5.18E-19	CART	PIGL
ZMYND8	1.76E-23	-1270942298	328	735	5.23E-19	CART	ZMYND8
PRKRIP1	1.77E-23	-158469863	196	564	5.29E-19	CART	PRKRIP1
KANTR	1.95E-23	-2311218207	53	312	5.81E-19	CART	KANTR
CDKL1	1.99E-23	-27209639	51	303	5.93E-19	CART	CDKL1
MDFIC	1.99E-23	-1267543362	518	838	5.93E-19	CART	MDFIC
ZDHHC17	2.01E-23	-1450601066	177	551	5.98E-19	CART	ZDHHC17
KCNQ1	2.18E-23	-2363649247	61	329	6.50E-19	CART	KCNQ1
GPR171	2.23E-23	854840133	939	0.94	6.65E-19	CART	GPR171
ZNF254	2.31E-23	-1566135432	147	491	6.87E-19	CART	ZNF254
AL645465.1	2.35E-23	-2997692192	25	239	6.99E-19	CART	AL645465.1
TXNDC16	2.46E-23	-2029236632	64	338	7.34E-19	CART	TXNDC16
AC068888.1	2.58E-23	-3177786127	23	235	7.70E-19	CART	AC068888.1
OSBPL8	2.59E-23	-9058648008	0.81	979	7.72E-19	CART	OSBPL8
TMBIM6	2.62E-23	8523951066	932	893	7.79E-19	CART	TMBIM6
RANBP9	2.63E-23	-1442492335	304	684	7.83E-19	CART	RANBP9
ATP2C1	2.64E-23	-1560858478	206	573	7.86E-19	CART	ATP2C1
EHMT1	2.70E-23	-1199856644	383	748	8.06E-19	CART	EHMT1
AL133480.1	2.87E-23	-2725760278	13	205	8.54E-19	CART	AL133480.1
NIN	2.92E-23	-1294937743	444	791	8.69E-19	CART	NIN
SNHG22	2.92E-23	-2331895878	0.04	278	8.71E-19	CART	SNHG22
RAB28	2.94E-23	-1517816873	208	573	8.75E-19	CART	RAB28
BCL2L1	3.12E-23	-1463655445	167	0.53	9.28E-19	CART	BCL2L1
BTAF1	3.12E-23	-153386433	215	581	9.31E-19	CART	BTAF1
ITPR1	3.21E-23	-1123488287	325	709	9.55E-19	CART	ITPR1
AC015813.2	3.25E-23	-3994805891	8	188	9.69E-19	CART	AC015813.2
MAPK1	3.46E-23	-1164170449	401	786	1.03E-18	CART	MAPK1
SLC23A2	3.80E-23	-1758244933	94	397	1.13E-18	CART	SLC23A2
SUMO2	4.07E-23	6215220395	965	949	1.21E-18	CART	SUMO2
MTA3	4.57E-23	-1535300126	175	0.53	1.36E-18	CART	MTA3
LATS1	4.77E-23	-1190210551	249	654	1.42E-18	CART	LATS1
MAPKAP1	4.90E-23	-1477871253	0.3	684	1.46E-18	CART	MAPKAP1
AC007384.1	4.93E-23	-1894258909	137	0.47	1.47E-18	CART	AC007384.1
EPS15	4.96E-23	-1172053771	503	829	1.48E-18	CART	EPS15
SLC16A7	5.17E-23	-122633326	249	645	1.54E-18	CART	SLC16A7
ASXL1	5.45E-23	-1266406558	363	739	1.62E-18	CART	ASXL1
TLE4	5.50E-23	-1165195326	403	786	1.64E-18	CART	TLE4
STIM2	5.55E-23	-1224049396	459	803	1.65E-18	CART	STIM2
SORL1	6.28E-23	-1166734803	503	825	1.87E-18	CART	SORL1
RPS8	6.54E-23	5065119398	982	979	1.95E-18	CART	RPS8
GNLY	6.97E-23	-1427184906	393	761	2.08E-18	CART	GNLY
NEK1	7.04E-23	-1391223374	322	697	2.10E-18	CART	NEK1
WASL	7.16E-23	-1785264815	153	496	2.13E-18	CART	WASL
RBM26	7.26E-23	-1078990084	579	868	2.16E-18	CART	RBM26
FAM13B	7.38E-23	-1269407485	342	731	2.20E-18	CART	FAM13B
RNASET2	7.49E-23	1421295444	769	0.62	2.23E-18	CART	RNASET2
SLAMF6	7.67E-23	-156024581	175	0.53	2.28E-18	CART	SLAMF6
CSNK1G3	7.73E-23	-104459827	0.38	782	2.30E-18	CART	CSNK1G3
HELB	7.85E-23	-1189588338	361	774	2.34E-18	CART	HELB
AC005037.1	8.08E-23	-2781485841	33	256	2.41E-18	CART	AC005037.1
UHRF1BP1	8.89E-23	-1865026015	58	321	2.65E-18	CART	UHRF1BP1
AHNAK	8.93E-23	1661193003	756	598	2.66E-18	CART	AHNAK
CSGALNACT2	9.53E-23	-1114820012	429	812	2.84E-18	CART	CSGALNACT2
FAM102B	9.62E-23	-1886136993	124	0.44	2.86E-18	CART	FAM102B
CRTC3	9.72E-23	-127010212	388	761	2.89E-18	CART	CRTC3
MAPK8	9.89E-23	-2310248644	155	466	2.95E-18	CART	MAPK8
KLHDC10	1.00E-22	-1451280208	162	509	2.99E-18	CART	KLHDC10
CUBN	1.02E-22	-2542508924	0.05	295	3.02E-18	CART	CUBN
SPON1-AS1	1.02E-22	-4457573392	8	184	3.02E-18	CART	SPON1-AS1
LDHB	1.10E-22	7153376586	957	936	3.27E-18	CART	LDHB
PLCG1-AS1	1.16E-22	-3354169907	13	201	3.46E-18	CART	PLCG1-AS1
WAC	1.20E-22	-8658891108	713	932	3.57E-18	CART	WAC
AL035530.2	1.22E-22	-244668079	33	256	3.62E-18	CART	AL035530.2
LAIR1	1.28E-22	-151211162	137	483	3.82E-18	CART	LAIR1
AKAP7	1.29E-22	-1513292593	162	509	3.85E-18	CART	AKAP7
CENPK	1.29E-22	-1355394934	277	671	3.85E-18	CART	CENPK
JAZF1	1.34E-22	-1715999943	137	457	3.98E-18	CART	JAZF1
AL391056.1	1.43E-22	-2986731081	38	265	4.25E-18	CART	AL391056.1
ATP6V1G1	1.44E-22	7147911093	929	936	4.29E-18	CART	ATP6V1G1
AL137856.1	1.46E-22	-2369982237	54	308	4.34E-18	CART	AL137856.1
PDZD8	1.49E-22	-1288614811	244	628	4.45E-18	CART	PDZD8
USP9X	1.51E-22	-1109077774	446	833	4.51E-18	CART	USP9X
CCR6	1.52E-22	3405894994	406	64	4.54E-18	CART	CCR6
RASA3	1.64E-22	-16613107	285	654	4.89E-18	CART	RASA3
PRF1	1.88E-22	-7386992887	305	739	5.62E-18	CART	PRF1
RUFY3	1.91E-22	-199786836	135	449	5.70E-18	CART	RUFY3
SLC35F3	2.03E-22	-2626363505	76	342	6.05E-18	CART	SLC35F3
FGGY	2.04E-22	-2471048155	68	329	6.08E-18	CART	FGGY
ATP8B1	2.06E-22	-295033125	38	265	6.15E-18	CART	ATP8B1
TRAF3IP2-AS1	2.17E-22	-2081310885	104	402	6.47E-18	CART	TRAF3IP2-AS1
SNX25	2.30E-22	-1780484729	153	474	6.85E-18	CART	SNX25
URI1	2.31E-22	-1233042181	393	769	6.87E-18	CART	URI1
GPBP1L1	2.34E-22	-111711288	355	756	6.96E-18	CART	GPBP1L1
AC068533.3	2.37E-22	-3438642799	23	226	7.05E-18	CART	AC068533.3
BCL2L11	2.41E-22	-1236286242	0.21	585	7.18E-18	CART	BCL2L11
MED14	2.53E-22	-1706828005	139	466	7.54E-18	CART	MED14
IFITM2	2.62E-22	-8319186913	873	936	7.81E-18	CART	IFITM2
SPRY1	2.63E-22	-1390441641	182	543	7.84E-18	CART	SPRY1
SMARCA2	2.69E-22	-1018875766	505	876	8.01E-18	CART	SMARCA2
AC011477.4	2.80E-22	-4358632271	7	175	8.33E-18	CART	AC011477.4
MRPL34	2.82E-22	1319725785	733	496	8.40E-18	CART	MRPL34
MMP24	2.83E-22	-3919762224	13	197	8.42E-18	CART	MMP24
ACTG1	2.86E-22	8405106832	0.97	953	8.53E-18	CART	ACTG1
ARFIP1	3.02E-22	-1373196903	234	0.62	8.98E-18	CART	ARFIP1
TMEM71	3.06E-22	-1417686653	305	675	9.13E-18	CART	TMEM71
MAPRE2	3.19E-22	-1438319913	327	697	9.50E-18	CART	MAPRE2
ZNF789	3.31E-22	-211639699	64	329	9.86E-18	CART	ZNF789
AL390763.2	3.34E-22	-3712731762	13	197	9.96E-18	CART	AL390763.2
RETREG1	3.35E-22	-1226530944	353	731	9.98E-18	CART	RETREG1
HMGN4	3.42E-22	-1595424589	0.15	496	1.02E-17	CART	HMGN4
RPS4X	3.55E-22	5264459598	979	0.97	1.06E-17	CART	RPS4X
CHD9	3.57E-22	-1039218568	442	816	1.06E-17	CART	CHD9
REPS1	3.68E-22	-1417835525	266	0.65	1.10E-17	CART	REPS1
DPP4	3.72E-22	-1190516085	439	774	1.11E-17	CART	DPP4
IL9R	3.92E-22	-2132836123	51	299	1.17E-17	CART	IL9R
USP33	3.92E-22	-1060866383	431	795	1.17E-17	CART	USP33
S1PR4	4.03E-22	1326697862	799	679	1.20E-17	CART	S1PR4
CDK13	4.09E-22	-9284987997	673	927	1.22E-17	CART	CDK13
ATF6	4.23E-22	-1351652597	323	705	1.26E-17	CART	ATF6
AUH	4.36E-22	-1525482027	244	598	1.30E-17	CART	AUH
SYNRG	4.73E-22	-7802787045	776	944	1.41E-17	CART	SYNRG
AC022146.2	4.77E-22	-2559848691	23	226	1.42E-17	CART	AC022146.2
TMEM65	4.88E-22	-1495088664	249	607	1.45E-17	CART	TMEM65
TBC1D8	4.95E-22	-3725003374	17	205	1.48E-17	CART	TBC1D8
AC025165.2	5.02E-22	-3401773624	15	201	1.50E-17	CART	AC025165.2
STK38	5.18E-22	-1011368809	616	0.91	1.54E-17	CART	STK38
SLC25A26	5.38E-22	-1506969167	182	534	1.60E-17	CART	SLC25A26
AC008569.1	5.43E-22	-360431464	15	201	1.62E-17	CART	AC008569.1
AKAP10	5.54E-22	-1405634934	228	594	1.65E-17	CART	AKAP10
MAP4K3	5.67E-22	-2155094715	84	363	1.69E-17	CART	MAP4K3
PHACTR4	5.70E-22	-1231184905	351	739	1.70E-17	CART	PHACTR4
ZNF638	5.77E-22	-9943895442	576	885	1.72E-17	CART	ZNF638
HELZ	5.77E-22	-8891763581	673	932	1.72E-17	CART	HELZ
ADARB1	5.87E-22	-141962629	142	0.47	1.75E-17	CART	ADARB1
VOPP1	5.91E-22	-1324884956	363	718	1.76E-17	CART	VOPP1
SLC10A1	5.93E-22	-4787905025	5	167	1.77E-17	CART	SLC10A1
ARHGDIB	6.04E-22	5932571582	977	966	1.80E-17	CART	ARHGDIB
SAMD8	6.23E-22	-160616415	155	487	1.86E-17	CART	SAMD8
MICU2	7.05E-22	-1115354639	398	765	2.10E-17	CART	MICU2
LRRC37A3	7.12E-22	-314443419	28	235	2.12E-17	CART	LRRC37A3
DIP2A	7.16E-22	-1167542074	347	739	2.13E-17	CART	DIP2A
GPR174	7.25E-22	-1341536164	266	0.65	2.16E-17	CART	GPR174
UBTD2	7.77E-22	-2127614359	87	368	2.31E-17	CART	UBTD2
CPEB3	7.92E-22	-2003031881	79	355	2.36E-17	CART	CPEB3
PPM1D	8.34E-22	-1756364525	106	406	2.48E-17	CART	PPM1D
TAF2	8.71E-22	-1374978653	219	585	2.60E-17	CART	TAF2
ARHGEF7	8.92E-22	-1232960469	327	714	2.66E-17	CART	ARHGEF7
SNX14	9.01E-22	-1167058024	262	667	2.69E-17	CART	SNX14
NDUFA4	9.18E-22	7521904055	931	893	2.74E-17	CART	NDUFA4
TMEM245	9.47E-22	-1170008315	365	752	2.82E-17	CART	TMEM245
ANO6	9.64E-22	-1512591194	216	564	2.87E-17	CART	ANO6
TCF20	9.78E-22	-1425573794	185	0.53	2.91E-17	CART	TCF20
PAFAH1B1	1.02E-21	-9645992228	715	0.94	3.03E-17	CART	PAFAH1B1
PAK1	1.02E-21	-1640831938	122	436	3.05E-17	CART	PAK1
MAST2	1.04E-21	-257631628	41	269	3.10E-17	CART	MAST2
DUSP16	1.06E-21	-1069847317	469	842	3.17E-17	CART	DUSP16
SRSF7	1.17E-21	118862105	804	658	3.47E-17	CART	SRSF7
PDE9A	1.17E-21	-1691368636	87	372	3.48E-17	CART	PDE9A
KCMF1	1.17E-21	-1185079325	426	778	3.49E-17	CART	KCMF1
KIZ-AS1	1.17E-21	-3734045896	12	188	3.49E-17	CART	KIZ-AS1
ARRDC3-AS1	1.22E-21	-2462569744	0.03	244	3.63E-17	CART	ARRDC3-AS1
ATG14	1.24E-21	-158407832	172	513	3.68E-17	CART	ATG14
LDAH	1.25E-21	-2154953671	116	406	3.71E-17	CART	LDAH
SLC2A13	1.26E-21	-2325159331	45	278	3.76E-17	CART	SLC2A13
CORO1A	1.27E-21	7551996361	932	915	3.77E-17	CART	CORO1A
OTULIN	1.29E-21	-1171583891	452	795	3.83E-17	CART	OTULIN
AC009299.3	1.29E-21	-4149259926	7	171	3.86E-17	CART	AC009299.3
DENND6A	1.30E-21	-1435612052	229	585	3.88E-17	CART	DENND6A
CCDC18	1.35E-21	-1953825313	0.13	432	4.02E-17	CART	CCDC18
MT1F	1.36E-21	-1469291152	0.14	0.47	4.07E-17	CART	MT1F
TANK	1.38E-21	-9807872402	713	927	4.11E-17	CART	TANK
BRWD3	1.39E-21	-1441120192	196	543	4.14E-17	CART	BRWD3
CEACAM21	1.44E-21	-1480723339	211	564	4.30E-17	CART	CEACAM21
UPP2	1.55E-21	-2668201182	21	218	4.62E-17	CART	UPP2
ANKRD23	1.56E-21	-2742551784	36	256	4.66E-17	CART	ANKRD23
AC024145.1	1.57E-21	-4064080652	7	171	4.67E-17	CART	AC024145.1
SPIN1	1.58E-21	-1473099521	223	585	4.70E-17	CART	SPIN1
RPS20	1.65E-21	4964790831	977	962	4.91E-17	CART	RPS20
MAPK14	1.68E-21	-1225302697	325	709	5.00E-17	CART	MAPK14
GIGYF2	1.68E-21	-1083702689	439	803	5.00E-17	CART	GIGYF2
RPL6	1.69E-21	5537258073	988	966	5.03E-17	CART	RPL6
HMG20A	1.79E-21	-1253645085	183	538	5.34E-17	CART	HMG20A
AC118549.1	1.84E-21	-117183092	252	632	5.47E-17	CART	AC118549.1
ZMYM4-AS1	1.84E-21	-4307547993	8	175	5.48E-17	CART	ZMYM4-AS1
RARS2	1.86E-21	-1376635232	224	585	5.54E-17	CART	RARS2
SH3D19	1.92E-21	-3517108482	13	192	5.71E-17	CART	SH3D19
KPNA1	1.95E-21	-1487748751	272	645	5.82E-17	CART	KPNA1
MED27	1.96E-21	-1477358149	0.17	513	5.83E-17	CART	MED27
RPL23	1.98E-21	5653766538	972	0.97	5.90E-17	CART	RPL23
ELMO1-AS1	2.08E-21	-3413484657	15	197	6.20E-17	CART	ELMO1-AS1
EFCAB2	2.22E-21	-376989528	17	201	6.62E-17	CART	EFCAB2
SH2B3	2.23E-21	-1807572049	54	303	6.65E-17	CART	SH2B3
FBXO28	2.29E-21	-1301491629	224	598	6.83E-17	CART	FBXO28
CUX1	2.32E-21	-1276665739	236	607	6.90E-17	CART	CUX1
INSL6	2.44E-21	-5643583459	2	0.15	7.27E-17	CART	INSL6
ARSB	2.64E-21	-1589098484	87	368	7.87E-17	CART	ARSB
LINC02210-CRHR1	2.68E-21	-1828015725	33	248	7.98E-17	CART	LINC02210-CRHR1
FOXK2	2.68E-21	-1433051114	124	0.44	7.98E-17	CART	FOXK2
RBL1	2.85E-21	-125042976	211	568	8.49E-17	CART	RBL1
MAP4K5	2.87E-21	-1247552693	231	598	8.55E-17	CART	MAP4K5
FBXL20	2.92E-21	-1206698158	333	697	8.71E-17	CART	FBXL20
HERPUD1	2.94E-21	1364347388	769	679	8.76E-17	CART	HERPUD1
NDEL1	3.36E-21	-1326491884	231	598	1.00E-16	CART	NDEL1
CPEB2	3.42E-21	-1746519353	124	427	1.02E-16	CART	CPEB2
FO393401.1	3.44E-21	-1531377114	168	504	1.03E-16	CART	FO393401.1
NCOA6	3.53E-21	-1382674338	215	564	1.05E-16	CART	NCOA6
PLEKHA2	3.65E-21	-108403602	583	902	1.09E-16	CART	PLEKHA2
RABGAP1	4.10E-21	-1590169515	193	521	1.22E-16	CART	RABGAP1
STK10	4.11E-21	-1000950601	584	889	1.22E-16	CART	STK10
PTEN	4.14E-21	-1006007958	578	906	1.23E-16	CART	PTEN
PTPN9	4.15E-21	-1554041156	0.21	0.56	1.24E-16	CART	PTPN9
OPRM1	4.19E-21	-3056851711	23	218	1.25E-16	CART	OPRM1
RPS25	4.27E-21	4492225729	982	979	1.27E-16	CART	RPS25
BTBD1	4.64E-21	-1171953011	267	658	1.38E-16	CART	BTBD1
USP37	4.68E-21	-1607272923	139	453	1.40E-16	CART	USP37
NUP133	4.93E-21	-1835328211	104	397	1.47E-16	CART	NUP133
CHD2	5.12E-21	-1058685014	513	838	1.52E-16	CART	CHD2
ACACA	5.29E-21	-1999470602	0.12	0.41	1.58E-16	CART	ACACA
CRLF3	5.43E-21	-114412271	446	774	1.62E-16	CART	CRLF3
MICU1	5.61E-21	-1821222518	218	556	1.67E-16	CART	MICU1
LINC02256	5.64E-21	-3036463044	25	222	1.68E-16	CART	LINC02256
ETS1	5.82E-21	-6729310701	858	983	1.73E-16	CART	ETS1
MAK	6.36E-21	-271450973	23	218	1.89E-16	CART	MAK
ZNF44	6.45E-21	-123252978	122	0.44	1.92E-16	CART	ZNF44
FCER1G	6.51E-21	-2275679597	45	274	1.94E-16	CART	FCER1G
C9orf135	6.70E-21	-2893260736	41	261	2.00E-16	CART	C9orf135
NDUFS5	6.72E-21	7531690829	937	906	2.00E-16	CART	NDUFS5
TUT7	6.84E-21	-9310263548	505	0.85	2.04E-16	CART	TUT7
VIM	7.14E-21	8799358512	959	949	2.13E-16	CART	VIM
CASS4	7.24E-21	-2259346385	53	291	2.16E-16	CART	CASS4
ALKBH1	7.36E-21	-2172423683	58	303	2.19E-16	CART	ALKBH1
SUB1	7.43E-21	6913598043	959	944	2.21E-16	CART	SUB1
ANAPC10	7.45E-21	-136871113	224	585	2.22E-16	CART	ANAPC10
ARFGEF2	7.76E-21	-1484501499	185	534	2.31E-16	CART	ARFGEF2
YAF2	7.79E-21	-1224709639	409	769	2.32E-16	CART	YAF2
CCDC107	8.05E-21	144025484	0.71	564	2.40E-16	CART	CCDC107
GSTK1	8.23E-21	1129315041	848	808	2.45E-16	CART	GSTK1
BMT2	8.66E-21	-1869406228	112	402	2.58E-16	CART	BMT2
CRTC3-AS1	8.73E-21	-2576339016	23	218	2.60E-16	CART	CRTC3-AS1
AL355581.1	8.76E-21	-3504707724	18	201	2.61E-16	CART	AL355581.1
SNX29	8.82E-21	-1672975236	137	449	2.63E-16	CART	SNX29
AC004039.1	9.18E-21	-5724702103	2	145	2.74E-16	CART	AC004039.1
RPL24	9.84E-21	4402795994	983	966	2.93E-16	CART	RPL24
ZNF565	9.89E-21	-2661178801	31	239	2.95E-16	CART	ZNF565
AC017083.3	9.94E-21	-3063756407	23	214	2.96E-16	CART	AC017083.3
CD69	1.02E-20	-9509843682	0.68	944	3.03E-16	CART	CD69
ST8SIA4	1.02E-20	-12414058	528	825	3.04E-16	CART	ST8SIA4
ID3	1.02E-20	-158407884	87	368	3.04E-16	CART	ID3
ECPAS	1.05E-20	-1575400981	0.2	551	3.12E-16	CART	ECPAS
USP18	1.07E-20	-2184663829	0.05	282	3.18E-16	CART	USP18
AC022973.3	1.12E-20	-4009589759	0.01	175	3.34E-16	CART	AC022973.3
QKI	1.12E-20	-121630383	0.3	0.65	3.34E-16	CART	QKI
AC098850.3	1.14E-20	-2564361512	46	274	3.39E-16	CART	AC098850.3
SAMSN1	1.14E-20	-9016732913	804	944	3.39E-16	CART	SAMSN1
FAM193A	1.15E-20	-1354682618	191	534	3.42E-16	CART	FAM193A
MEGF9	1.17E-20	-2070445296	129	423	3.48E-16	CART	MEGF9
SLC25A13	1.23E-20	-2016749666	83	0.35	3.65E-16	CART	SLC25A13
DGKD	1.30E-20	-1370277967	196	543	3.87E-16	CART	DGKD
SESN1	1.34E-20	-1370604874	0.19	534	3.98E-16	CART	SESN1
ELOB	1.35E-20	6995652866	0.96	923	4.01E-16	CART	ELOB
MCPH1-AS1	1.36E-20	-2872843179	0.02	205	4.06E-16	CART	MCPH1-AS1
FBXL5	1.40E-20	-1185049969	0.32	705	4.17E-16	CART	FBXL5
ATG10	1.40E-20	-1600862419	0.17	491	4.18E-16	CART	ATG10
SHLD1	1.43E-20	-1691684482	139	449	4.27E-16	CART	SHLD1
SLC14A1	1.44E-20	-2636497379	59	295	4.30E-16	CART	SLC14A1
POLA1	1.49E-20	-2350678592	61	303	4.43E-16	CART	POLA1
ATF7IP2	1.50E-20	-128391459	422	739	4.47E-16	CART	ATF7IP2
AC027097.2	1.66E-20	-3103593476	26	222	4.96E-16	CART	AC027097.2
CFL1	1.82E-20	5253040312	975	957	5.42E-16	CART	CFL1
AL139022.1	1.84E-20	-3004172016	25	218	5.49E-16	CART	AL139022.1
WDFY2	1.87E-20	-1238932191	327	688	5.57E-16	CART	WDFY2
LINC01358	1.94E-20	-1874129527	81	346	5.79E-16	CART	LINC01358
PPP3CB	1.95E-20	-1162445248	335	705	5.82E-16	CART	PPP3CB
AP000311.1	2.03E-20	-4172223321	7	162	6.05E-16	CART	AP000311.1
AL513188.1	2.03E-20	-4230555004	7	162	6.05E-16	CART	AL513188.1
USP20	2.05E-20	-1274584166	173	513	6.10E-16	CART	USP20
YWHAH	2.12E-20	1341157964	744	607	6.32E-16	CART	YWHAH
RARRES3	2.15E-20	-862809166	0.8	0.94	6.39E-16	CART	RARRES3
TMEM181	2.15E-20	-1220060262	289	658	6.41E-16	CART	TMEM181
SLC7A6	2.21E-20	-1319745721	246	615	6.59E-16	CART	SLC7A6
COX10	2.23E-20	-1724703072	116	0.41	6.64E-16	CART	COX10
IQCB1	2.25E-20	-1336539887	315	671	6.71E-16	CART	IQCB1
IPO11	2.41E-20	-2726057141	31	235	7.18E-16	CART	IPO11
RAB12	2.51E-20	-2103965427	46	274	7.46E-16	CART	RAB12
HCST	2.54E-20	-7543465843	823	953	7.55E-16	CART	HCST
APRT	2.88E-20	1021760948	856	791	8.58E-16	CART	APRT
PIK3C3	2.90E-20	-1076781245	295	692	8.63E-16	CART	PIK3C3
WRN	2.94E-20	-2044953977	124	415	8.77E-16	CART	WRN
TMEM164	2.95E-20	-2311750363	51	282	8.78E-16	CART	TMEM164
ZRSR2	3.45E-20	-1072818396	213	0.59	1.03E-15	CART	ZRSR2
C9orf84	3.70E-20	-3255490411	23	209	1.10E-15	CART	C9orf84
PARN	3.79E-20	-1300640938	241	603	1.13E-15	CART	PARN
PSMA7	4.05E-20	74692053	939	0.91	1.21E-15	CART	PSMA7
TRAPPC8	4.14E-20	-1332417687	277	645	1.23E-15	CART	TRAPPC8
CELF2	4.51E-20	-7441491421	847	966	1.34E-15	CART	CELF2
PHKB	4.67E-20	-1159295411	375	748	1.39E-15	CART	PHKB
PHF20	4.67E-20	-993402293	472	842	1.39E-15	CART	PHF20
TTC27	4.70E-20	-1771727834	81	338	1.40E-15	CART	TTC27
PAM	4.90E-20	-22873569	0.12	397	1.46E-15	CART	PAM
CXCR3	5.25E-20	-1074672249	172	521	1.56E-15	CART	CXCR3
XRRA1	5.33E-20	-1717246664	0.12	419	1.59E-15	CART	XRRA1
SLC30A6	5.41E-20	-1612331968	127	427	1.61E-15	CART	SLC30A6
RNF125	5.66E-20	-1020530765	462	803	1.69E-15	CART	RNF125
ANKS1A	5.70E-20	-2079202667	87	346	1.70E-15	CART	ANKS1A
SP4	5.75E-20	-1194846023	332	705	1.71E-15	CART	SP4
CMTM6	5.82E-20	1107966288	804	705	1.73E-15	CART	CMTM6
ORC2	5.86E-20	-1295885097	269	624	1.75E-15	CART	ORC2
NUBPL	5.94E-20	-1975392504	69	316	1.77E-15	CART	NUBPL
AC098829.1	6.35E-20	-3182471525	18	197	1.89E-15	CART	AC098829.1
XPO6	6.49E-20	-1119751467	279	662	1.93E-15	CART	XPO6
RCOR3	6.61E-20	-1070647164	0.33	701	1.97E-15	CART	RCOR3
WIPF1	6.75E-20	-6327332202	884	979	2.01E-15	CART	WIPF1
PPP1R13B	6.78E-20	-3188430914	23	209	2.02E-15	CART	PPP1R13B
BTBD7	6.95E-20	-1176631748	271	628	2.07E-15	CART	BTBD7
SGPP1	7.17E-20	-1669517559	0.13	423	2.13E-15	CART	SGPP1
VPS53	7.32E-20	-949006646	223	603	2.18E-15	CART	VPS53
STXBP1	7.71E-20	-1772525869	91	359	2.30E-15	CART	STXBP1
AC018816.1	7.79E-20	-1676736446	117	406	2.32E-15	CART	AC018816.1
GALNT6	7.82E-20	-1981943805	101	385	2.33E-15	CART	GALNT6
TTC37	7.83E-20	-1145117183	337	726	2.33E-15	CART	TTC37
AC007566.1	7.86E-20	-4327938485	7	158	2.34E-15	CART	AC007566.1
EGLN3	7.87E-20	-2037909764	83	342	2.34E-15	CART	EGLN3
KLHL28	8.25E-20	-1117551314	264	632	2.46E-15	CART	KLHL28
ZNRF2	8.59E-20	-1589139629	158	462	2.56E-15	CART	ZNRF2
AGO3	8.61E-20	-1240040746	335	684	2.57E-15	CART	AGO3
ABLIM1	8.73E-20	-1218403418	462	808	2.60E-15	CART	ABLIM1
MPHOSPH9	9.19E-20	-1197925981	348	718	2.74E-15	CART	MPHOSPH9
UFL1-AS1	9.25E-20	-4666948932	8	162	2.76E-15	CART	UFL1-AS1
TRIP12	9.43E-20	-9016526113	607	902	2.81E-15	CART	TRIP12
FLOT1	9.57E-20	-9505782762	413	791	2.85E-15	CART	FLOT1
NUMB	1.03E-19	-1147869328	315	692	3.08E-15	CART	NUMB
BMPR1A	1.05E-19	-2305673377	87	342	3.12E-15	CART	BMPR1A
TMLHE-AS1	1.07E-19	-3676674931	17	188	3.17E-15	CART	TMLHE-AS1
HDAC4	1.08E-19	-1367489929	243	594	3.22E-15	CART	HDAC4
ELF1	1.08E-19	-6813462037	868	966	3.22E-15	CART	ELF1
MACROD2	1.12E-19	-4406342603	3	145	3.32E-15	CART	MACROD2
AL449266.1	1.12E-19	-3387069367	15	184	3.35E-15	CART	AL449266.1
SLCO3A1	1.26E-19	-1132262479	342	718	3.75E-15	CART	SLCO3A1
C22orf34	1.34E-19	-2852391737	36	239	4.00E-15	CART	C22orf34
PTPN13	1.34E-19	568946968	297	9	4.00E-15	CART	PTPN13
CSTB	1.44E-19	805960571	894	885	4.28E-15	CART	CSTB
SETD2	1.47E-19	-8549327606	616	915	4.38E-15	CART	SETD2
APC	1.49E-19	-1219194262	261	645	4.44E-15	CART	APC
LNPEP	1.54E-19	-9287061803	0.63	889	4.58E-15	CART	LNPEP
CWF19L1	1.56E-19	-1610040002	144	449	4.65E-15	CART	CWF19L1
Z83844.2	1.73E-19	-3683430098	0.01	167	5.17E-15	CART	Z83844.2
SAP130	1.76E-19	-1293154608	119	419	5.24E-15	CART	SAP130
UQCC1	1.77E-19	-1823702491	107	385	5.26E-15	CART	UQCC1
RFLNB	1.78E-19	-9314481892	592	889	5.31E-15	CART	RFLNB
AC090971.2	1.86E-19	-3090670133	18	192	5.54E-15	CART	AC090971.2
ANGPT2	1.87E-19	-180919936	89	355	5.57E-15	CART	ANGPT2
APPBP2	1.90E-19	-1315044687	246	598	5.66E-15	CART	APPBP2
CHM	1.96E-19	-1396666534	226	564	5.83E-15	CART	CHM
DGLUCY	1.98E-19	-1216179219	309	675	5.88E-15	CART	DGLUCY
LINC01871	2.03E-19	-8786188213	637	0.91	6.05E-15	CART	LINC01871
ZNF586	2.03E-19	-1687945767	94	363	6.06E-15	CART	ZNF586
DDX60	2.10E-19	-1298760858	193	526	6.26E-15	CART	DDX60
STRBP	2.12E-19	-1414498202	254	0.59	6.31E-15	CART	STRBP
PRDX2	2.13E-19	1013452176	835	756	6.34E-15	CART	PRDX2
JPT1	2.13E-19	112366526	0.8	701	6.35E-15	CART	JPT1
TMEM161B-AS1	2.15E-19	-145414436	175	496	6.40E-15	CART	TMEM161B-AS1
AC006030.1	2.19E-19	-2879797313	0.02	197	6.53E-15	CART	AC006030.1
PLEKHM3	2.26E-19	-2189379993	63	299	6.74E-15	CART	PLEKHM3
MANBA	2.33E-19	-129173903	186	521	6.94E-15	CART	MANBA
CD2AP	2.34E-19	-1204916653	333	697	6.97E-15	CART	CD2AP
INTS7	2.44E-19	-2011134378	111	0.38	7.28E-15	CART	INTS7
NPC1	2.52E-19	-9600459841	243	632	7.49E-15	CART	NPC1
MIR181A1HG	2.53E-19	-1448960204	175	479	7.53E-15	CART	MIR181A1HG
SCYL2	2.79E-19	-1205718952	226	585	8.30E-15	CART	SCYL2
ALG13	2.95E-19	-1278433739	297	0.65	8.80E-15	CART	ALG13
EMSY	3.07E-19	-1580868183	0.19	504	9.14E-15	CART	EMSY
MMD	3.14E-19	-1356281583	195	538	9.35E-15	CART	MMD
SELENOI	3.31E-19	-1767043025	107	385	9.85E-15	CART	SELENOI
LNX2	3.39E-19	-1790733007	86	346	1.01E-14	CART	LNX2
AC096558.2	3.43E-19	-2722230046	18	192	1.02E-14	CART	AC096558.2
FHL3	3.49E-19	-2239998656	48	265	1.04E-14	CART	FHL3
GOLGA8A	3.62E-19	-1258483993	233	581	1.08E-14	CART	GOLGA8A
UTY	3.84E-19	4460256552	302	13	1.15E-14	CART	UTY
NMT1	4.14E-19	-126195838	188	538	1.23E-14	CART	NMT1
CHD7	4.21E-19	-9998558944	246	607	1.25E-14	CART	CHD7
AL158152.2	4.24E-19	-2397494027	21	201	1.26E-14	CART	AL158152.2
P4HA1	4.24E-19	-1605700708	167	474	1.26E-14	CART	P4HA1
AC022217.3	4.27E-19	-4500029743	0.01	162	1.27E-14	CART	AC022217.3
PARP11	4.34E-19	-1215250414	155	474	1.29E-14	CART	PARP11
RAB6A	4.41E-19	-1098821687	403	735	1.32E-14	CART	RAB6A
SRSF5	4.55E-19	7584745059	914	902	1.35E-14	CART	SRSF5
AGPS	4.72E-19	-1220201418	281	641	1.41E-14	CART	AGPS
BRWD1	4.96E-19	-8907898819	0.54	872	1.48E-14	CART	BRWD1
ATXN7	5.17E-19	-193841479	51	274	1.54E-14	CART	ATXN7
CERKL	5.18E-19	-2712893442	31	226	1.54E-14	CART	CERKL
PDHX	5.32E-19	-148290821	124	419	1.58E-14	CART	PDHX
PSMB3	5.35E-19	9311540776	817	778	1.59E-14	CART	PSMB3
PIK3IP1-AS1	5.39E-19	-3151464936	25	205	1.61E-14	CART	PIK3IP1-AS1
TULP4	5.46E-19	-1333212175	0.32	658	1.63E-14	CART	TULP4
OSBPL9	5.50E-19	-1228223358	317	662	1.64E-14	CART	OSBPL9
PIK3CB	5.73E-19	-1541272436	158	466	1.71E-14	CART	PIK3CB
LINC00243	5.74E-19	-161798507	106	385	1.71E-14	CART	LINC00243
C2CD5	5.95E-19	-142681372	193	517	1.77E-14	CART	C2CD5
RAB30	5.98E-19	-1769102927	106	0.38	1.78E-14	CART	RAB30
ANKRD36	6.32E-19	-1199754101	365	709	1.88E-14	CART	ANKRD36
SLAMF7	6.35E-19	-1767259805	86	342	1.89E-14	CART	SLAMF7
AC114760.2	6.59E-19	-1130198107	353	697	1.96E-14	CART	AC114760.2
LMBRD1	6.65E-19	-1085323249	413	739	1.98E-14	CART	LMBRD1
HKR1	6.78E-19	-1773167578	81	338	2.02E-14	CART	HKR1
ZNF710	6.83E-19	-2124817454	46	261	2.03E-14	CART	ZNF710
MCU	6.84E-19	-1912430956	76	321	2.04E-14	CART	MCU
AP000919.2	6.98E-19	-2931772803	26	209	2.08E-14	CART	AP000919.2
SENP2	7.02E-19	-136792421	144	453	2.09E-14	CART	SENP2
AC008083.2	7.08E-19	-1753321712	91	0.35	2.11E-14	CART	AC008083.2
INO80D	7.19E-19	-987150558	0.35	731	2.14E-14	CART	INO80D
UIMC1	7.22E-19	-1213966096	309	675	2.15E-14	CART	UIMC1
PRELID1	7.31E-19	9885511223	858	812	2.18E-14	CART	PRELID1
APPL2	7.39E-19	-1260120082	215	556	2.20E-14	CART	APPL2
AC079209.2	7.60E-19	-3242306065	23	201	2.27E-14	CART	AC079209.2
AC004551.1	7.65E-19	-3606751248	0.01	162	2.28E-14	CART	AC004551.1
SNED1	7.72E-19	-2567032599	36	235	2.30E-14	CART	SNED1
MSL2	8.13E-19	-143268239	279	611	2.42E-14	CART	MSL2
PUM1	8.24E-19	-890793238	503	855	2.46E-14	CART	PUM1
KDM3B	8.25E-19	-1338445877	274	611	2.46E-14	CART	KDM3B
PLCXD2	8.43E-19	-1759539768	64	303	2.51E-14	CART	PLCXD2
AL592295.4	8.52E-19	-3055315155	0.02	192	2.54E-14	CART	AL592295.4
ULK4	8.84E-19	-157659444	162	462	2.64E-14	CART	ULK4
PFDN5	9.11E-19	5225855484	972	966	2.71E-14	CART	PFDN5
PUDP	9.19E-19	-2107792537	54	278	2.74E-14	CART	PUDP
CDKN2B-AS1	9.35E-19	-2687213741	21	197	2.79E-14	CART	CDKN2B-AS1
ST3GAL1	1.02E-18	-9600754469	462	859	3.04E-14	CART	ST3GAL1
DCAF10	1.06E-18	-1444442065	252	581	3.15E-14	CART	DCAF10
SENP6	1.08E-18	-8956627911	548	863	3.23E-14	CART	SENP6
RASGRP1	1.08E-18	-6656219002	848	0.97	3.23E-14	CART	RASGRP1
MTCP1	1.11E-18	-2863033393	25	205	3.31E-14	CART	MTCP1
DOPEY2	1.11E-18	-16539759	111	385	3.32E-14	CART	DOPEY2
AC015849.3	1.12E-18	-2403762174	35	231	3.34E-14	CART	AC015849.3
GLIPR2	1.19E-18	-1205940908	282	641	3.53E-14	CART	GLIPR2
PKD2L2	1.20E-18	-2830337772	25	205	3.56E-14	CART	PKD2L2
ZNF512	1.20E-18	-1558292514	132	423	3.58E-14	CART	ZNF512
MCCC1	1.20E-18	-1614994694	125	419	3.58E-14	CART	MCCC1
PCBD2	1.23E-18	-1533788362	155	449	3.66E-14	CART	PCBD2
CEP120	1.32E-18	-1382382747	172	483	3.93E-14	CART	CEP120
ARL6IP4	1.33E-18	8757186996	843	778	3.95E-14	CART	ARL6IP4
NSMAF	1.37E-18	-1266370839	267	607	4.10E-14	CART	NSMAF
C2CD3	1.38E-18	-18309208	104	372	4.10E-14	CART	C2CD3
DNMT3A	1.38E-18	-1605727696	0.15	444	4.13E-14	CART	DNMT3A
TAF3	1.39E-18	-1062226252	371	731	4.13E-14	CART	TAF3
RABEP1	1.52E-18	-1205786929	328	697	4.53E-14	CART	RABEP1
AREL1	1.57E-18	-1617820727	111	0.38	4.68E-14	CART	AREL1
DOPEY1	1.62E-18	-152393967	144	436	4.83E-14	CART	DOPEY1
UCP2	1.69E-18	1246241958	731	573	5.04E-14	CART	UCP2
SYNJ1	1.73E-18	-170226961	172	474	5.17E-14	CART	SYNJ1
AC008438.1	1.75E-18	-3496537684	15	175	5.22E-14	CART	AC008438.1
GNE	1.78E-18	-1729678172	69	312	5.32E-14	CART	GNE
TES	1.83E-18	-858589551	479	838	5.44E-14	CART	TES
PPIA	1.83E-18	6185664196	952	962	5.47E-14	CART	PPIA
ARID3B	1.84E-18	-1462509019	119	402	5.48E-14	CART	ARID3B
RIC8B	1.88E-18	-2021324563	117	397	5.60E-14	CART	RIC8B
ANKAR	1.91E-18	-1628269439	104	372	5.71E-14	CART	ANKAR
G2E3	1.93E-18	-1471464575	191	504	5.74E-14	CART	G2E3
APBA2	1.99E-18	-3124653997	17	179	5.93E-14	CART	APBA2
GTF2F2	2.09E-18	-9670060315	0.29	667	6.22E-14	CART	GTF2F2
TRIM37	2.10E-18	-1474407085	177	487	6.25E-14	CART	TRIM37
METTL16	2.19E-18	-1235038033	186	509	6.51E-14	CART	METTL16
CHKA	2.37E-18	-3237410183	15	175	7.06E-14	CART	CHKA
TNRC6A	2.45E-18	-1019444107	432	825	7.31E-14	CART	TNRC6A
AC005480.1	2.61E-18	-3233649387	17	179	7.77E-14	CART	AC005480.1
MIR34AHG	2.62E-18	-1805663189	56	278	7.81E-14	CART	MIR34AHG
MYH11	2.73E-18	-1617687311	74	316	8.15E-14	CART	MYH11
TUT4	2.76E-18	-8199475405	667	932	8.21E-14	CART	TUT4
STRN	2.78E-18	-1264481493	246	0.59	8.27E-14	CART	STRN
ZC3H12B	2.82E-18	-3851782684	0.01	158	8.39E-14	CART	ZC3H12B
TRIM24	2.85E-18	-1159688992	0.18	513	8.50E-14	CART	TRIM24
LRRC8B	2.86E-18	-1844065655	112	0.38	8.52E-14	CART	LRRC8B
AC011997.1	3.00E-18	-4750296795	5	141	8.94E-14	CART	AC011997.1
AC018541.1	3.08E-18	-4411187642	12	162	9.17E-14	CART	AC018541.1
AL117381.1	3.14E-18	-3058563657	0.02	188	9.36E-14	CART	AL117381.1
ZBTB20-AS5	3.17E-18	-4282155809	12	162	9.43E-14	CART	ZBTB20-AS5
SEL1L3	3.47E-18	-9996052396	366	731	1.03E-13	CART	SEL1L3
RPS12	3.63E-18	4246828843	983	974	1.08E-13	CART	RPS12
2025-09-06	3.69E-18	-6480568553	883	962	1.10E-13	CART	2025-09-06
SMAP1	3.77E-18	-7985617935	606	906	1.12E-13	CART	SMAP1
CD40LG	3.82E-18	187944032	446	124	1.14E-13	CART	CD40LG
ZMYM2	3.96E-18	-8441812061	632	906	1.18E-13	CART	ZMYM2
ARHGEF6	4.06E-18	-8834691049	543	842	1.21E-13	CART	ARHGEF6
TMEM241	4.07E-18	-3438598507	12	162	1.21E-13	CART	TMEM241
AC009690.2	4.39E-18	-2509479389	23	197	1.31E-13	CART	AC009690.2
RYBP	4.43E-18	-1101862589	0.31	684	1.32E-13	CART	RYBP
ARRB1	4.46E-18	-2368252135	45	248	1.33E-13	CART	ARRB1
ABR	4.50E-18	-1244723101	145	453	1.34E-13	CART	ABR
GLIPR1	4.69E-18	1339028496	743	658	1.40E-13	CART	GLIPR1
TTC13	4.74E-18	-1317590179	158	0.47	1.41E-13	CART	TTC13
TAF15	4.80E-18	-8342392347	583	889	1.43E-13	CART	TAF15
MARK3	5.04E-18	-9779363314	0.45	791	1.50E-13	CART	MARK3
TEAD1	5.07E-18	-3490697645	12	162	1.51E-13	CART	TEAD1
TIMM23B	5.10E-18	-1397460912	137	432	1.52E-13	CART	TIMM23B
SESTD1	5.12E-18	-2545022445	21	192	1.52E-13	CART	SESTD1
BCKDHB	5.43E-18	-195638087	104	359	1.62E-13	CART	BCKDHB
DEK	6.11E-18	8162750415	906	859	1.82E-13	CART	DEK
COMMD6	6.27E-18	7280066479	921	872	1.87E-13	CART	COMMD6
MOB1B	6.38E-18	-1675255573	106	368	1.90E-13	CART	MOB1B
ZFYVE9	6.62E-18	-3146949459	15	171	1.97E-13	CART	ZFYVE9
INPP5B	6.64E-18	-1353460528	132	427	1.98E-13	CART	INPP5B
NLRP1	6.92E-18	-1339453846	295	632	2.06E-13	CART	NLRP1
RPL36AL	7.01E-18	4459094713	0.98	966	2.09E-13	CART	RPL36AL
TMTC4	7.03E-18	-166151293	97	355	2.09E-13	CART	TMTC4
NAA35	7.03E-18	-1059668365	203	538	2.09E-13	CART	NAA35
LINC01588	7.09E-18	-1468685526	139	419	2.11E-13	CART	LINC01588
TMLHE	7.12E-18	-1979819295	81	321	2.12E-13	CART	TMLHE
DGCR2	7.82E-18	-1591113564	97	363	2.33E-13	CART	DGCR2
RRP12	8.06E-18	-2238605367	31	218	2.40E-13	CART	RRP12
USP49	8.14E-18	-2413434007	54	265	2.43E-13	CART	USP49
SLC30A9	8.48E-18	-1064707119	236	573	2.53E-13	CART	SLC30A9
OPA1	8.99E-18	-1131926602	327	675	2.68E-13	CART	OPA1
TNFRSF25	9.08E-18	1927951855	513	256	2.70E-13	CART	TNFRSF25
SHOC2	9.32E-18	-9938242957	391	748	2.78E-13	CART	SHOC2
RPL11	9.37E-18	3833398108	982	974	2.79E-13	CART	RPL11
TMEM62	9.37E-18	-1617272045	89	342	2.79E-13	CART	TMEM62
COX5B	9.62E-18	7429238966	904	897	2.87E-13	CART	COX5B
KIAA0319L	9.82E-18	-1008231695	0.53	855	2.93E-13	CART	KIAA0319L
CEPT1	1.02E-17	-1194113431	233	0.56	3.03E-13	CART	CEPT1
LSM14A	1.02E-17	-7502586612	668	936	3.05E-13	CART	LSM14A
PSEN1	1.07E-17	-1305004505	257	581	3.19E-13	CART	PSEN1
IGF2R	1.12E-17	-1046761322	289	641	3.35E-13	CART	IGF2R
DYNLL1	1.15E-17	954213886	0.88	782	3.42E-13	CART	DYNLL1
ELF2	1.15E-17	-1000683192	477	791	3.44E-13	CART	ELF2
HAVCR2	1.19E-17	-1057232324	441	769	3.55E-13	CART	HAVCR2
SLAIN1	1.27E-17	-1845480327	74	312	3.77E-13	CART	SLAIN1
CITED2	1.29E-17	2331562923	0.49	231	3.83E-13	CART	CITED2
GRIP1	1.46E-17	-2105740048	33	218	4.35E-13	CART	GRIP1
PIK3CG	1.46E-17	-1043691958	223	564	4.36E-13	CART	PIK3CG
EYS	1.48E-17	-2812835032	31	214	4.41E-13	CART	EYS
RAF1	1.48E-17	-1111218879	251	585	4.42E-13	CART	RAF1
NCAM1	1.50E-17	-3865457373	12	158	4.48E-13	CART	NCAM1
ZNF236-DT	1.52E-17	-2310250074	33	218	4.52E-13	CART	ZNF236-DT
INTS9	1.53E-17	-1832772552	73	303	4.56E-13	CART	INTS9
CFLAR-AS1	1.54E-17	-2166826444	0.04	235	4.58E-13	CART	CFLAR-AS1
GTF2IRD2B	1.56E-17	-2500967101	38	231	4.64E-13	CART	GTF2IRD2B
MAL	1.58E-17	-1078906889	343	684	4.70E-13	CART	MAL
RNF165	1.61E-17	-256272145	25	197	4.80E-13	CART	RNF165
MIR646HG	1.64E-17	-5180000903	7	141	4.90E-13	CART	MIR646HG
GAREM1	1.64E-17	-3546680453	13	162	4.90E-13	CART	GAREM1
SS18	1.74E-17	-1019627865	431	782	5.18E-13	CART	SS18
CEACAM1	1.76E-17	-1392353111	132	0.41	5.25E-13	CART	CEACAM1
BCAS4	1.82E-17	-1102105459	0.15	453	5.41E-13	CART	BCAS4
ZC3HAV1	1.89E-17	-6490436568	797	983	5.64E-13	CART	ZC3HAV1
ZXDC	1.92E-17	-1954423531	101	0.35	5.72E-13	CART	ZXDC
GSAP	2.02E-17	-1546365878	97	355	6.02E-13	CART	GSAP
VAV1	2.05E-17	-9138921373	272	637	6.11E-13	CART	VAV1
IGF1R	2.07E-17	-1861426397	54	265	6.18E-13	CART	IGF1R
EIF2B3	2.09E-17	-1721410368	124	393	6.22E-13	CART	EIF2B3
ZMYND11	2.17E-17	-1149339348	318	662	6.46E-13	CART	ZMYND11
LINC01891	2.20E-17	-2221082647	31	214	6.56E-13	CART	LINC01891
SLC9A8	2.27E-17	-144207999	112	0.38	6.76E-13	CART	SLC9A8
RABAC1	2.37E-17	8475548316	886	855	7.05E-13	CART	RABAC1
RBFOX1	2.42E-17	-3189206534	13	162	7.22E-13	CART	RBFOX1
VRK2	2.43E-17	-1567772396	0.12	389	7.25E-13	CART	VRK2
SFI1	2.44E-17	-1118221569	216	543	7.28E-13	CART	SFI1
NARS2	2.45E-17	-1994891857	81	312	7.31E-13	CART	NARS2
PRMT2	2.54E-17	-7969421663	612	0.91	7.57E-13	CART	PRMT2
GLS	2.57E-17	-7491955967	632	897	7.65E-13	CART	GLS
HIBCH	2.58E-17	-1523197419	183	479	7.68E-13	CART	HIBCH
COG6	2.66E-17	-1833122426	139	406	7.94E-13	CART	COG6
MPP5	2.76E-17	-1993240634	83	321	8.22E-13	CART	MPP5
COA1	2.82E-17	-1054016999	454	752	8.40E-13	CART	COA1
FBXO38	2.83E-17	-1229111824	165	474	8.44E-13	CART	FBXO38
WNK1	2.86E-17	-6984599205	703	915	8.52E-13	CART	WNK1
DIAPH2-AS1	3.03E-17	-4140407217	0.01	0.15	9.02E-13	CART	DIAPH2-AS1
MACF1	3.23E-17	-6801499515	817	979	9.63E-13	CART	MACF1
AC008083.1	3.26E-17	-2982660188	18	175	9.71E-13	CART	AC008083.1
XPO7	3.26E-17	-1677205542	163	462	9.72E-13	CART	XPO7
ANXA2	3.38E-17	9363836906	884	825	1.01E-12	CART	ANXA2
LINC00886	3.40E-17	-2858554323	31	209	1.01E-12	CART	LINC00886
ORC5	3.47E-17	-1489761071	0.13	402	1.03E-12	CART	ORC5
SNX13	3.47E-17	-1342279692	218	0.53	1.04E-12	CART	SNX13
SPATA1	3.51E-17	-1799770129	48	252	1.05E-12	CART	SPATA1
ATL2	3.57E-17	-1368405624	157	453	1.06E-12	CART	ATL2
TNFSF13B	3.64E-17	2488554995	467	209	1.08E-12	CART	TNFSF13B
PBRM1	3.66E-17	-9359520945	441	786	1.09E-12	CART	PBRM1
ZNF814	3.76E-17	-1835851423	56	269	1.12E-12	CART	ZNF814
RSF1	3.77E-17	-7277006099	632	919	1.12E-12	CART	RSF1
DCP1A	3.89E-17	-1136671122	244	573	1.16E-12	CART	DCP1A
MIR4435-2HG	3.89E-17	-1154499418	0.5	795	1.16E-12	CART	MIR4435-2HG
C6orf106	3.98E-17	-1291849124	261	577	1.19E-12	CART	C6orf106
CHCHD2	3.99E-17	5798411086	0.95	927	1.19E-12	CART	CHCHD2
ABTB2	4.12E-17	-2955383244	28	201	1.23E-12	CART	ABTB2
CCDC173	4.18E-17	-4613588201	5	132	1.24E-12	CART	CCDC173
SHISAL2A	4.18E-17	-1646824896	101	355	1.25E-12	CART	SHISAL2A
STAT5B	4.37E-17	-9895941929	452	799	1.30E-12	CART	STAT5B
MAN1A2	4.40E-17	-1169375453	482	786	1.31E-12	CART	MAN1A2
CCNI	4.41E-17	6433836715	937	957	1.31E-12	CART	CCNI
C12orf57	4.45E-17	1023165868	832	735	1.33E-12	CART	C12orf57
RPL14	4.53E-17	3746983365	0.98	979	1.35E-12	CART	RPL14
DBN1	4.55E-17	-137972177	69	299	1.36E-12	CART	DBN1
AL138787.2	4.56E-17	-4403812968	5	132	1.36E-12	CART	AL138787.2
RGS1	4.80E-17	1901206141	629	427	1.43E-12	CART	RGS1
AC073343.2	4.99E-17	-2726906967	23	188	1.49E-12	CART	AC073343.2
SLC39A9	4.99E-17	-1672398553	0.12	385	1.49E-12	CART	SLC39A9
TRPM2	5.06E-17	-2387942553	33	214	1.51E-12	CART	TRPM2
PDXDC1	5.25E-17	-9448683848	285	641	1.57E-12	CART	PDXDC1
KCTD9	5.28E-17	-1178350753	183	496	1.57E-12	CART	KCTD9
AC007038.1	5.56E-17	-2306195021	51	256	1.66E-12	CART	AC007038.1
UPF2	5.59E-17	-7745418644	531	855	1.66E-12	CART	UPF2
AC008781.2	5.69E-17	-3296206564	12	154	1.70E-12	CART	AC008781.2
PDLIM1	5.70E-17	-3225580088	21	184	1.70E-12	CART	PDLIM1
AL139021.2	5.78E-17	-3380068704	13	158	1.72E-12	CART	AL139021.2
LEMD3	6.14E-17	-1113561003	252	603	1.83E-12	CART	LEMD3
DHRS7B	6.22E-17	-198797466	74	295	1.85E-12	CART	DHRS7B
KCTD13	6.38E-17	-1406927504	84	329	1.90E-12	CART	KCTD13
NUS1	6.46E-17	-1539451095	173	466	1.93E-12	CART	NUS1
RALGAPB	6.97E-17	-108220878	249	0.59	2.08E-12	CART	RALGAPB
TESPA1	7.01E-17	-9683615229	422	761	2.09E-12	CART	TESPA1
TBC1D23	7.26E-17	-121370895	173	479	2.16E-12	CART	TBC1D23
AC084337.2	7.28E-17	-3170098646	12	154	2.17E-12	CART	AC084337.2
SLC24A1	7.30E-17	-2472102644	25	192	2.18E-12	CART	SLC24A1
HAVCR1	7.37E-17	-2343723392	25	192	2.20E-12	CART	HAVCR1
RORA	7.43E-17	6751601499	942	0.88	2.21E-12	CART	RORA
KDM5B	7.46E-17	-9451907005	479	808	2.22E-12	CART	KDM5B
TAOK1	7.87E-17	-1011982943	485	795	2.34E-12	CART	TAOK1
LMO4	8.01E-17	1546588963	667	513	2.39E-12	CART	LMO4
LINC02325	8.01E-17	-244809999	26	197	2.39E-12	CART	LINC02325
PNRC1	8.32E-17	7263264982	908	893	2.48E-12	CART	PNRC1
ENOX2	8.45E-17	-1637720144	111	359	2.52E-12	CART	ENOX2
CERS4	8.49E-17	-1375862629	109	376	2.53E-12	CART	CERS4
IP6K1	8.53E-17	-1303391188	236	551	2.54E-12	CART	IP6K1
ATP6V1H	8.92E-17	-114127894	295	637	2.66E-12	CART	ATP6V1H
ABCC4	9.10E-17	-2111190401	68	286	2.71E-12	CART	ABCC4
ANKRD26	9.23E-17	-1212892833	0.19	491	2.75E-12	CART	ANKRD26
PARG	9.26E-17	-1076184794	198	0.53	2.76E-12	CART	PARG
TET1	9.44E-17	-1772328601	106	359	2.81E-12	CART	TET1
UBE3D	9.63E-17	-184747556	87	321	2.87E-12	CART	UBE3D
SAT1	9.79E-17	1211186272	776	654	2.92E-12	CART	SAT1
TTC19	9.98E-17	-940898493	351	692	2.97E-12	CART	TTC19
HECTD1	1.00E-16	-9129004112	497	816	2.99E-12	CART	HECTD1
ARMC8	1.02E-16	-1017508213	309	662	3.04E-12	CART	ARMC8
TTTY15	1.03E-16	484415921	266	13	3.07E-12	CART	TTTY15
CD58	1.05E-16	-8768864977	533	838	3.14E-12	CART	CD58
UQCRB	1.10E-16	5515091153	964	953	3.28E-12	CART	UQCRB
SLC25A5	1.13E-16	1030867303	799	714	3.35E-12	CART	SLC25A5
SPDYA	1.13E-16	-3106975074	18	171	3.36E-12	CART	SPDYA
SRGAP2	1.13E-16	-1087122986	226	543	3.38E-12	CART	SRGAP2
TMTC2	1.21E-16	-2556628025	35	214	3.59E-12	CART	TMTC2
SPTBN1	1.26E-16	-8774882864	389	744	3.76E-12	CART	SPTBN1
SPTLC2	1.30E-16	-1132575864	307	637	3.88E-12	CART	SPTLC2
UBE3A	1.32E-16	-9163423172	502	825	3.92E-12	CART	UBE3A
PIKFYVE	1.32E-16	-1085237602	0.31	628	3.92E-12	CART	PIKFYVE
RAD52	1.33E-16	-2010808095	71	291	3.97E-12	CART	RAD52
ZNF131	1.33E-16	-9209479763	472	799	3.97E-12	CART	ZNF131
TTBK2	1.33E-16	-1579597772	149	415	3.97E-12	CART	TTBK2
VPS35L	1.36E-16	-1319772721	134	415	4.06E-12	CART	VPS35L
UHRF2	1.39E-16	-1091965617	337	671	4.14E-12	CART	UHRF2
UBASH3B	1.39E-16	-1619144559	97	342	4.15E-12	CART	UBASH3B
EIF3K	1.42E-16	7377590452	921	868	4.23E-12	CART	EIF3K
DDX60L	1.42E-16	-1172671953	279	0.62	4.25E-12	CART	DDX60L
FYB1	1.44E-16	-5691877364	898	983	4.28E-12	CART	FYB1
LINC00894	1.55E-16	-2746853557	0.02	175	4.62E-12	CART	LINC00894
SEC31A	1.58E-16	-951345633	432	774	4.70E-12	CART	SEC31A
ZNF736	1.58E-16	-1731864324	59	274	4.72E-12	CART	ZNF736
ZER1	1.60E-16	-1670960231	97	346	4.76E-12	CART	ZER1
AC130324.2	1.60E-16	-4767207814	5	128	4.77E-12	CART	AC130324.2
TEX14	1.63E-16	-4653473941	5	128	4.84E-12	CART	TEX14
C12orf40	1.69E-16	-2761188252	18	171	5.03E-12	CART	C12orf40
MROH1	1.71E-16	-1988926535	74	295	5.08E-12	CART	MROH1
AL157938.2	1.74E-16	-1685876673	58	265	5.18E-12	CART	AL157938.2
DDX58	1.77E-16	-121591403	234	0.56	5.29E-12	CART	DDX58
RAB10	1.78E-16	-9276005958	0.53	846	5.30E-12	CART	RAB10
FAR1	1.78E-16	-139748417	249	551	5.31E-12	CART	FAR1
GDE1	1.84E-16	2042436809	492	244	5.48E-12	CART	GDE1
DLST	1.88E-16	-1316750398	186	496	5.60E-12	CART	DLST
ATG5	1.92E-16	-1056120932	368	705	5.73E-12	CART	ATG5
NUP98	1.93E-16	-9135736901	353	692	5.75E-12	CART	NUP98
IER3	2.00E-16	-1212996615	0.18	479	5.95E-12	CART	IER3
SOD2.1	2.01E-16	-3220744773	12	0.15	5.99E-12	CART	SOD2.1
TASP1	2.06E-16	-1662239423	109	363	6.13E-12	CART	TASP1
SIMC1	2.07E-16	-1497653093	132	397	6.15E-12	CART	SIMC1
SPATA5	2.10E-16	-1809965179	157	419	6.25E-12	CART	SPATA5
MAPK8IP3	2.11E-16	-1588469047	68	286	6.29E-12	CART	MAPK8IP3
RALY	2.16E-16	-779913557	498	825	6.42E-12	CART	RALY
CD55	2.17E-16	-8271630308	612	0.88	6.48E-12	CART	CD55
FBXO33	2.36E-16	-1217703122	276	598	7.03E-12	CART	FBXO33
MACO1	2.36E-16	-1064740198	206	526	7.03E-12	CART	MACO1
MFSD10	2.40E-16	1923544745	507	265	7.15E-12	CART	MFSD10
KIAA0232	2.41E-16	-1009194661	292	0.62	7.18E-12	CART	KIAA0232
GRAMD4	2.41E-16	-2335078638	48	244	7.18E-12	CART	GRAMD4
AC093157.1	2.45E-16	-1701416496	137	402	7.30E-12	CART	AC093157.1
RC3H2	2.55E-16	-9264878987	353	684	7.61E-12	CART	RC3H2
GSDMB	2.55E-16	-1503465906	96	342	7.61E-12	CART	GSDMB
AAGAB	2.57E-16	-1412247812	208	509	7.65E-12	CART	AAGAB
NDFIP2	2.60E-16	-1060692648	282	603	7.74E-12	CART	NDFIP2
EXOC6	2.65E-16	-1304683905	157	0.44	7.89E-12	CART	EXOC6
WDR26	2.68E-16	-9230936462	424	761	7.98E-12	CART	WDR26
CA5B	2.69E-16	-1307993065	172	466	8.02E-12	CART	CA5B
AC025682.1	2.71E-16	-2161012382	33	209	8.08E-12	CART	AC025682.1
TMEM260	2.73E-16	-1397561585	183	474	8.13E-12	CART	TMEM260
ITGB3BP	2.76E-16	-1344301834	134	406	8.23E-12	CART	ITGB3BP
C17orf97	2.78E-16	-2315154958	26	192	8.28E-12	CART	C17orf97
AC104986.2	2.85E-16	-2462966275	26	192	8.48E-12	CART	AC104986.2
AC005920.2	2.85E-16	-4083293726	7	132	8.48E-12	CART	AC005920.2
CLIP4	2.85E-16	-1093980501	0.33	671	8.51E-12	CART	CLIP4
IL18RAP	2.96E-16	-1801900297	91	325	8.82E-12	CART	IL18RAP
Z93930.2	2.97E-16	-1361147833	173	462	8.85E-12	CART	Z93930.2
CNOT4	2.98E-16	-8851569884	488	812	8.87E-12	CART	CNOT4
RSRC1	2.99E-16	-1165915969	0.36	671	8.91E-12	CART	RSRC1
EPHA1-AS1	3.02E-16	-1897608222	145	397	9.01E-12	CART	EPHA1-AS1
PSTPIP2	3.06E-16	-1778445493	61	269	9.12E-12	CART	PSTPIP2
AP002812.2	3.09E-16	-3309878847	13	154	9.20E-12	CART	AP002812.2
ATXN10	3.16E-16	-1003961644	317	637	9.42E-12	CART	ATXN10
ARMC2	3.23E-16	-2572966734	36	214	9.62E-12	CART	ARMC2
CD72	3.29E-16	-2269608307	48	239	9.79E-12	CART	CD72
AL022097.1	3.29E-16	-5666670893	0	107	9.80E-12	CART	AL022097.1
NUP210	3.31E-16	-1123578303	261	624	9.86E-12	CART	NUP210
ALS2	3.33E-16	-2019698645	56	261	9.91E-12	CART	ALS2
CREB1	3.34E-16	-9739986294	449	765	9.94E-12	CART	CREB1
MOSMO	3.35E-16	-140057858	195	491	9.99E-12	CART	MOSMO
REV3L	3.55E-16	-9744869325	508	795	1.06E-11	CART	REV3L
CBWD2	3.64E-16	-1445632239	74	299	1.08E-11	CART	CBWD2
ZNF595	3.71E-16	-330176954	7	132	1.11E-11	CART	ZNF595
GBE1	3.81E-16	-1883150168	87	316	1.13E-11	CART	GBE1
CNOT1	3.84E-16	-9303375204	434	782	1.14E-11	CART	CNOT1
OCIAD2	3.85E-16	9056331159	858	821	1.15E-11	CART	OCIAD2
ITM2A	3.96E-16	1082803646	767	679	1.18E-11	CART	ITM2A
AGK	4.04E-16	-137838047	129	397	1.20E-11	CART	AGK
PARP1	4.12E-16	104715228	782	697	1.23E-11	CART	PARP1
CNR2	4.13E-16	-2910850086	18	167	1.23E-11	CART	CNR2
UBE2K	4.18E-16	-7260815122	0.68	923	1.25E-11	CART	UBE2K
MAP2K6	4.48E-16	-1498413782	134	402	1.34E-11	CART	MAP2K6
ATP5F1D	4.92E-16	6986288657	893	893	1.47E-11	CART	ATP5F1D
PDS5B	4.98E-16	-9725652237	447	769	1.48E-11	CART	PDS5B
ZNF721	4.99E-16	-8811737344	307	662	1.49E-11	CART	ZNF721
CASTOR3	5.02E-16	-1956278427	61	269	1.49E-11	CART	CASTOR3
COL10A1	5.08E-16	-3691533091	8	137	1.51E-11	CART	COL10A1
TMEM161B	5.19E-16	-1099019239	224	551	1.55E-11	CART	TMEM161B
CCND2	5.28E-16	-7932481348	719	885	1.57E-11	CART	CCND2
HIBADH	5.58E-16	-1629726915	132	393	1.66E-11	CART	HIBADH
FANCC	5.70E-16	-2082807268	33	205	1.70E-11	CART	FANCC
AL137145.2	5.91E-16	-2097751065	68	278	1.76E-11	CART	AL137145.2
AGFG1	6.02E-16	-1320323896	272	577	1.79E-11	CART	AGFG1
SSBP3	6.11E-16	-1035591457	294	615	1.82E-11	CART	SSBP3
CNST	6.18E-16	-8472872918	302	658	1.84E-11	CART	CNST
AC107068.2	6.88E-16	-435931252	5	124	2.05E-11	CART	AC107068.2
SPNS3	6.88E-16	-1373624522	97	342	2.05E-11	CART	SPNS3
PSMD5	6.92E-16	-1192445803	236	564	2.06E-11	CART	PSMD5
RPA1	7.03E-16	-1015332061	315	671	2.09E-11	CART	RPA1
ABCB7	7.07E-16	-1306271318	185	479	2.11E-11	CART	ABCB7
TRGC2	7.11E-16	-1695423528	142	397	2.12E-11	CART	TRGC2
LINC02362	7.31E-16	-2479101089	18	167	2.18E-11	CART	LINC02362
TRAK2	7.48E-16	-1008362917	248	577	2.23E-11	CART	TRAK2
MYH10	7.54E-16	-2272113872	28	192	2.25E-11	CART	MYH10
COMMD3	7.91E-16	1405864074	629	444	2.36E-11	CART	COMMD3
LINC02478	8.25E-16	-5008863109	2	111	2.46E-11	CART	LINC02478
AC116348.3	8.42E-16	-3424918371	12	145	2.51E-11	CART	AC116348.3
PIK3CD-AS2	8.77E-16	-2184970704	26	188	2.61E-11	CART	PIK3CD-AS2
KIAA0556	9.18E-16	-140961254	59	265	2.74E-11	CART	KIAA0556
ARMH1	9.37E-16	-1801140489	58	261	2.79E-11	CART	ARMH1
TRAPPC10	9.48E-16	-798129274	543	846	2.82E-11	CART	TRAPPC10
NAP1L1	9.48E-16	7018578965	909	932	2.82E-11	CART	NAP1L1
BMPR2	9.54E-16	-1330832899	203	487	2.84E-11	CART	BMPR2
ECD	9.56E-16	-1869991002	0.14	397	2.85E-11	CART	ECD
IMMP1L	9.63E-16	-119301655	198	491	2.87E-11	CART	IMMP1L
KPNA3	9.76E-16	-9678468102	365	701	2.91E-11	CART	KPNA3
A1BG-AS1	1.00E-15	-2409297975	23	179	2.98E-11	CART	A1BG-AS1
PDE6G	1.02E-15	-1844830299	0.05	244	3.05E-11	CART	PDE6G
CUL1	1.03E-15	-1059439811	342	692	3.07E-11	CART	CUL1
RYK	1.08E-15	-1740060817	92	321	3.22E-11	CART	RYK
LRRC63	1.12E-15	-3080229562	25	179	3.32E-11	CART	LRRC63
MRPL1	1.14E-15	-1440374076	175	457	3.38E-11	CART	MRPL1
SUCLA2	1.15E-15	-1112437204	252	568	3.43E-11	CART	SUCLA2
SIL1	1.23E-15	-1438909358	175	466	3.67E-11	CART	SIL1
PLSCR1	1.24E-15	-9327307464	347	697	3.70E-11	CART	PLSCR1
ABCA5	1.24E-15	-1601414579	107	0.35	3.70E-11	CART	ABCA5
AC026470.2	1.25E-15	-394151224	7	128	3.72E-11	CART	AC026470.2
HLA-DRA	1.25E-15	2041749046	576	372	3.72E-11	CART	HLA-DRA
COG3	1.26E-15	-1279362486	213	521	3.76E-11	CART	COG3
NR3C2	1.27E-15	-2038228351	41	222	3.78E-11	CART	NR3C2
ALG13-AS1	1.28E-15	-4073119953	7	128	3.81E-11	CART	ALG13-AS1
FAM227B	1.29E-15	-1605462734	64	269	3.83E-11	CART	FAM227B
AC010260.1	1.37E-15	-2907001645	13	0.15	4.07E-11	CART	AC010260.1
GPR107	1.39E-15	-1294082475	135	406	4.14E-11	CART	GPR107
RPRD1A	1.41E-15	-125972647	195	496	4.22E-11	CART	RPRD1A
AL365356.1	1.45E-15	-3051764597	17	158	4.31E-11	CART	AL365356.1
EIF4B	1.46E-15	8647627358	0.85	803	4.34E-11	CART	EIF4B
CCNH	1.48E-15	-1046611931	512	795	4.40E-11	CART	CCNH
PRKD2	1.49E-15	-1126191059	201	509	4.44E-11	CART	PRKD2
ACBD6	1.52E-15	-1197755212	0.36	679	4.53E-11	CART	ACBD6
C9orf41-AS1	1.55E-15	-2996551636	17	158	4.63E-11	CART	C9orf41-AS1
ZC2HC1A	1.59E-15	4124667351	264	21	4.74E-11	CART	ZC2HC1A
RAB1A	1.66E-15	-8923585159	417	739	4.94E-11	CART	RAB1A
POGZ	1.68E-15	-883663498	294	654	5.00E-11	CART	POGZ
ANO10	1.69E-15	-2023421832	63	265	5.02E-11	CART	ANO10
LINC01550	1.70E-15	-1441105268	134	402	5.08E-11	CART	LINC01550
MIGA1	1.71E-15	-1181514788	236	534	5.09E-11	CART	MIGA1
AC096677.1	1.74E-15	-2754319269	23	175	5.19E-11	CART	AC096677.1
ERAP1	1.78E-15	-9951709895	249	0.59	5.31E-11	CART	ERAP1
EIF4A2	1.81E-15	8579710997	856	833	5.39E-11	CART	EIF4A2
C1orf147	1.89E-15	-2612624928	13	0.15	5.62E-11	CART	C1orf147
ATP5PF	1.92E-15	7348624193	871	833	5.73E-11	CART	ATP5PF
STRADB	1.95E-15	-1568784791	111	363	5.81E-11	CART	STRADB
ADGRE5	1.95E-15	-1057498729	413	739	5.81E-11	CART	ADGRE5
CASD1	1.95E-15	-1177036235	228	543	5.82E-11	CART	CASD1
RPRD1B	2.01E-15	-1216055861	0.12	0.38	5.98E-11	CART	RPRD1B
NCOR1	2.04E-15	-5970813935	748	927	6.07E-11	CART	NCOR1
PARK7	2.04E-15	7517427494	875	838	6.09E-11	CART	PARK7
SLC25A6	2.07E-15	7543845226	0.87	0.85	6.18E-11	CART	SLC25A6
TSNARE1	2.08E-15	-2782111055	17	158	6.19E-11	CART	TSNARE1
TMEM87A	2.08E-15	-9385855697	408	748	6.20E-11	CART	TMEM87A
CISH	2.14E-15	-795212717	223	538	6.39E-11	CART	CISH
KIAA2026	2.22E-15	-9439823244	474	782	6.60E-11	CART	KIAA2026
CNOT6L	2.26E-15	-7899150459	754	949	6.73E-11	CART	CNOT6L
AC091045.1	2.30E-15	-3095374465	8	132	6.85E-11	CART	AC091045.1
AL354733.3	2.35E-15	-2045976361	48	235	6.99E-11	CART	AL354733.3
IL21R	2.38E-15	-1653064046	92	316	7.11E-11	CART	IL21R
ZNF43	2.39E-15	-1041464678	175	474	7.14E-11	CART	ZNF43
EDF1	2.40E-15	6455967533	919	0.91	7.15E-11	CART	EDF1
ETFA	2.41E-15	-9545863041	414	752	7.19E-11	CART	ETFA
ZNF761	2.45E-15	-1368821773	106	0.35	7.29E-11	CART	ZNF761
COL4A3BP	2.60E-15	-953170858	403	748	7.76E-11	CART	COL4A3BP
CDKN1B	2.61E-15	1177308658	744	688	7.77E-11	CART	CDKN1B
FAM13A	2.65E-15	-1839035642	101	333	7.89E-11	CART	FAM13A
EZH2	2.67E-15	-1341423048	231	534	7.96E-11	CART	EZH2
OIP5	2.67E-15	-2516090486	26	184	7.96E-11	CART	OIP5
ERAP2	2.69E-15	-9032625983	475	821	8.01E-11	CART	ERAP2
PTPRC	2.75E-15	-3134981493	1	1	8.21E-11	CART	PTPRC
HSPA8	2.76E-15	7360188347	904	0.88	8.21E-11	CART	HSPA8
MZT2B	2.83E-15	6710908418	908	885	8.42E-11	CART	MZT2B
DYNC1I2	2.84E-15	-9691205191	381	701	8.45E-11	CART	DYNC1I2
AC008537.1	2.88E-15	-2987193562	0.01	137	8.58E-11	CART	AC008537.1
AUTS2	2.89E-15	-1085284027	305	615	8.61E-11	CART	AUTS2
RAB11A	2.92E-15	-8311857225	543	863	8.69E-11	CART	RAB11A
PCM1	2.98E-15	-6374182092	751	936	8.89E-11	CART	PCM1
ADHFE1	3.01E-15	-1773676111	48	235	8.97E-11	CART	ADHFE1
IL4R	3.13E-15	-8092212091	413	761	9.32E-11	CART	IL4R
EP300	3.20E-15	-8396783972	427	752	9.52E-11	CART	EP300
C11orf80	3.21E-15	-213521961	41	218	9.57E-11	CART	C11orf80
GRAMD1B	3.24E-15	-1026227755	507	816	9.67E-11	CART	GRAMD1B
TPP2	3.35E-15	-8639951015	442	782	9.97E-11	CART	TPP2
BAZ2B	3.36E-15	-1191741398	168	453	1.00E-10	CART	BAZ2B
KIAA1257	3.43E-15	-3324979718	12	141	1.02E-10	CART	KIAA1257
ZNF790	3.50E-15	-1834971658	86	308	1.04E-10	CART	ZNF790
AC016831.5	3.63E-15	255910294	366	115	1.08E-10	CART	AC016831.5
PLAA	3.71E-15	-1141859892	173	466	1.11E-10	CART	PLAA
EVI2B	3.82E-15	1053760058	767	667	1.14E-10	CART	EVI2B
NDUFB11	3.92E-15	7612586716	858	838	1.17E-10	CART	NDUFB11
TIGAR	3.94E-15	-1326799167	228	513	1.17E-10	CART	TIGAR
RHOG	4.18E-15	121933912	683	564	1.24E-10	CART	RHOG
NVL	4.18E-15	-111588307	229	534	1.25E-10	CART	NVL
ATAD1	4.24E-15	-9299225802	373	722	1.26E-10	CART	ATAD1
SEC14L1	4.33E-15	-85965004	482	821	1.29E-10	CART	SEC14L1
NPC2	4.41E-15	167607818	556	359	1.32E-10	CART	NPC2
AHI1	4.44E-15	-1418229471	399	701	1.32E-10	CART	AHI1
SFXN5	4.46E-15	-1776884045	59	256	1.33E-10	CART	SFXN5
LINC02391	4.58E-15	-3177194986	13	145	1.36E-10	CART	LINC02391
BBX	4.63E-15	-8707965094	592	915	1.38E-10	CART	BBX
TRIM33	4.65E-15	-8557536119	421	739	1.38E-10	CART	TRIM33
TMEM184C	4.65E-15	-1543424492	97	333	1.39E-10	CART	TMEM184C
INTS4	4.72E-15	-1176948686	155	432	1.41E-10	CART	INTS4
AC020913.1	4.90E-15	-3669239554	7	124	1.46E-10	CART	AC020913.1
MKL2	5.05E-15	-202777764	69	269	1.51E-10	CART	MKL2
March8	5.10E-15	-1689502873	157	415	1.52E-10	CART	March8
AGBL5	5.11E-15	-2329102475	36	205	1.52E-10	CART	AGBL5
LAYN	5.23E-15	-156791961	107	338	1.56E-10	CART	LAYN
IMPG2	5.24E-15	-2817990293	25	175	1.56E-10	CART	IMPG2
AL603839.3	5.24E-15	-3812443709	7	124	1.56E-10	CART	AL603839.3
SOAT1	5.48E-15	-117238292	198	496	1.63E-10	CART	SOAT1
AC025917.1	5.52E-15	-2933076617	13	145	1.65E-10	CART	AC025917.1
GPR18	5.55E-15	-1282588386	92	325	1.65E-10	CART	GPR18
SMAD2	5.93E-15	-764963835	495	821	1.77E-10	CART	SMAD2
MYCBP2	5.94E-15	-6932431333	738	927	1.77E-10	CART	MYCBP2
UBE2F-SCLY	6.01E-15	-2869924092	15	0.15	1.79E-10	CART	UBE2F-SCLY
FBXL4	6.03E-15	-1233095323	172	457	1.80E-10	CART	FBXL4
WHAMM	6.07E-15	-9112622306	271	615	1.81E-10	CART	WHAMM
MAP2K1	6.14E-15	-9029869311	348	671	1.83E-10	CART	MAP2K1
CKMT2-AS1	6.17E-15	-1799483229	83	295	1.84E-10	CART	CKMT2-AS1
SPATS2	6.30E-15	-14363817	112	355	1.88E-10	CART	SPATS2
AP001267.3	6.41E-15	-2983647333	18	158	1.91E-10	CART	AP001267.3
RFX2	6.41E-15	-2050710282	51	235	1.91E-10	CART	RFX2
STK17A	6.62E-15	-5624219005	896	979	1.97E-10	CART	STK17A
NUP88	7.00E-15	-1263880897	183	474	2.09E-10	CART	NUP88
FBXL14	7.04E-15	-2357727672	33	197	2.10E-10	CART	FBXL14
SLC17A5	7.06E-15	-1043713545	167	453	2.10E-10	CART	SLC17A5
MAP3K7	7.08E-15	-9934922555	191	483	2.11E-10	CART	MAP3K7
OSTF1	7.22E-15	7889284126	873	846	2.15E-10	CART	OSTF1
ATP5MC3	7.24E-15	6835918189	891	855	2.16E-10	CART	ATP5MC3
FBXO6	7.30E-15	-1673161914	68	274	2.17E-10	CART	FBXO6
EIF3A	7.41E-15	7539587592	873	863	2.21E-10	CART	EIF3A
FAM217A	7.46E-15	-3268842853	8	128	2.22E-10	CART	FAM217A
SH2D3C	7.79E-15	-1277814182	178	0.47	2.32E-10	CART	SH2D3C
LINC02062	7.89E-15	-2343763663	0.02	162	2.35E-10	CART	LINC02062
PCSK5	7.97E-15	-3077440571	18	158	2.37E-10	CART	PCSK5
ANKFY1	8.26E-15	-9404670388	223	526	2.46E-10	CART	ANKFY1
MBOAT1	8.41E-15	-2391913821	61	252	2.51E-10	CART	MBOAT1
FAM126B	8.69E-15	-1019607441	0.32	0.65	2.59E-10	CART	FAM126B
HLA-DPB1	8.89E-15	1554565044	611	453	2.65E-10	CART	HLA-DPB1
SPON1	8.91E-15	-1986248046	54	244	2.66E-10	CART	SPON1
WDFY1	8.97E-15	-1044204619	205	509	2.67E-10	CART	WDFY1
LMF1	9.42E-15	-1453493978	54	244	2.81E-10	CART	LMF1
DROSHA	9.58E-15	-1593503233	76	286	2.85E-10	CART	DROSHA
CARD8	9.63E-15	-6955776008	573	872	2.87E-10	CART	CARD8
PEBP1	9.69E-15	9281012078	0.81	735	2.89E-10	CART	PEBP1
KAZN	9.71E-15	-3723845622	0.01	132	2.89E-10	CART	KAZN
CLEC12A	1.00E-14	-4103592391	13	141	2.99E-10	CART	CLEC12A
CCDC65	1.01E-14	-2265002035	46	226	3.00E-10	CART	CCDC65
SPACA9	1.03E-14	-2500899731	0.02	162	3.06E-10	CART	SPACA9
UBR5	1.03E-14	-8788397482	512	812	3.07E-10	CART	UBR5
RHOU	1.04E-14	-2620947093	33	192	3.09E-10	CART	RHOU
AP001767.3	1.04E-14	-2429205353	21	167	3.10E-10	CART	AP001767.3
FIG4	1.08E-14	-1991962683	68	265	3.21E-10	CART	FIG4
SMARCAL1	1.08E-14	-1503719057	102	333	3.22E-10	CART	SMARCAL1
FYN	1.09E-14	-6631134961	856	962	3.24E-10	CART	FYN
SCRN3	1.09E-14	-1147146835	109	355	3.25E-10	CART	SCRN3
AC022126.1	1.13E-14	-2962849709	5	115	3.37E-10	CART	AC022126.1
MTMR2	1.15E-14	-1831328583	92	308	3.42E-10	CART	MTMR2
PPARD	1.16E-14	-1491327076	99	329	3.47E-10	CART	PPARD
CITED4	1.18E-14	-2101533842	35	201	3.50E-10	CART	CITED4
PSMC5	1.19E-14	1142046448	662	517	3.55E-10	CART	PSMC5
SMG5	1.20E-14	-1343116132	106	342	3.57E-10	CART	SMG5
AL691403.1	1.25E-14	-4968879724	2	103	3.73E-10	CART	AL691403.1
AL589990.1	1.30E-14	-4323848142	5	115	3.87E-10	CART	AL589990.1
Dec1	1.30E-14	-3167982389	13	141	3.88E-10	CART	Dec1
SDCBP2-AS1	1.32E-14	-128583685	63	265	3.92E-10	CART	SDCBP2-AS1
RGS3	1.32E-14	-1655117057	79	291	3.94E-10	CART	RGS3
CEP70	1.32E-14	-2027143538	0.03	188	3.95E-10	CART	CEP70
EPB41L5	1.36E-14	-2705025748	0.03	184	4.05E-10	CART	EPB41L5
FURIN	1.40E-14	1331431106	655	521	4.18E-10	CART	FURIN
UBE2G1	1.43E-14	-1017860456	434	748	4.27E-10	CART	UBE2G1
POM121	1.49E-14	-9508984773	264	598	4.43E-10	CART	POM121
TRANK1	1.52E-14	-9086963646	373	709	4.52E-10	CART	TRANK1
MIR29B2CHG	1.59E-14	-1367737338	99	329	4.74E-10	CART	MIR29B2CHG
TPCN1	1.60E-14	-1773155205	64	261	4.75E-10	CART	TPCN1
TPTEP2-CSNK1E	1.62E-14	-2196839374	56	239	4.82E-10	CART	TPTEP2-CSNK1E
AC008937.2	1.66E-14	-4139223083	7	0.12	4.95E-10	CART	AC008937.2
ARNTL2-AS1	1.67E-14	-2424937884	12	137	4.98E-10	CART	ARNTL2-AS1
ATF2	1.69E-14	-119012196	322	641	5.03E-10	CART	ATF2
A2M	1.81E-14	-329357317	18	154	5.39E-10	CART	A2M
C5orf58	1.82E-14	-2985844879	15	145	5.42E-10	CART	C5orf58
ZNF708	1.84E-14	-9495073524	294	624	5.48E-10	CART	ZNF708
KLRD1	1.89E-14	-1697968028	63	256	5.64E-10	CART	KLRD1
BFSP2-AS1	1.93E-14	-3023025862	17	0.15	5.76E-10	CART	BFSP2-AS1
REXO2	1.98E-14	1264999619	645	509	5.90E-10	CART	REXO2
QRICH1	1.98E-14	-1233915827	226	521	5.91E-10	CART	QRICH1
ZC3HC1	2.00E-14	-1959206074	0.05	231	5.94E-10	CART	ZC3HC1
NSUN3	2.00E-14	-1183713263	173	449	5.95E-10	CART	NSUN3
CD59	2.07E-14	1665317608	528	312	6.15E-10	CART	CD59
ZNF592	2.09E-14	-1096308532	173	453	6.22E-10	CART	ZNF592
USF2	2.15E-14	1212047073	672	594	6.41E-10	CART	USF2
CCDC69	2.16E-14	-8529054008	389	731	6.43E-10	CART	CCDC69
KANSL3	2.27E-14	-1306642749	0.17	444	6.76E-10	CART	KANSL3
MICAL3	2.34E-14	-2109540696	56	244	6.97E-10	CART	MICAL3
IKBKE	2.35E-14	-8867691935	224	547	7.02E-10	CART	IKBKE
NUCB1-AS1	2.37E-14	-4617989679	3	107	7.06E-10	CART	NUCB1-AS1
AL359706.1	2.41E-14	-412569671	8	124	7.19E-10	CART	AL359706.1
DHX34	2.51E-14	-2481290537	0.03	184	7.48E-10	CART	DHX34
TFDP2	2.51E-14	-1257706673	233	513	7.49E-10	CART	TFDP2
AC099669.1	2.52E-14	-3280059008	8	124	7.50E-10	CART	AC099669.1
AGBL3	2.57E-14	-2591001353	25	171	7.67E-10	CART	AGBL3
FAM129A	2.68E-14	-7474088302	719	915	7.99E-10	CART	FAM129A
TLK2	2.70E-14	-9514526674	388	735	8.05E-10	CART	TLK2
TM7SF3	2.71E-14	-1083432188	271	585	8.07E-10	CART	TM7SF3
[truncated: 8,201 more rows]

## Sheet: Table S4
Table S4 : Number of different myeloid subtypes among the doublets and singlet myeloid cells
GBmap celltype	Doublet	Singlet
Mono	499	172
TAM_BDM	188	435
TAM_MG	8	102

## Sheet: Table S5
Table S5. List of marker genes for singlet and doublet myeloid cells
	p_val	avg_log2FC	pct.1	pct.2	p_val_adj	cluster	gene
RPS12	6.30729e-47	1.25476	0.856	0.919	1.87926e-42	Singlet	RPS12
GAPDH	2.66832e-45	1.17655	0.831	0.919	7.95027e-41	Singlet	GAPDH
TBRG1	4.94143e-43	0.535368	0.197	0.643	1.4723e-38	Singlet	TBRG1
RPL17	2.48585e-42	4.74062	0.575	0.384	7.40659e-38	Singlet	RPL17
RPLP1	1.2021e-41	0.928941	0.907	0.96	3.58167e-37	Singlet	RPLP1
OXR1	1.7764e-41	0.593355	0.178	0.591	5.29279e-37	Singlet	OXR1
RPL13	1.14306e-40	1.55962	0.772	0.894	3.40575e-36	Singlet	RPL13
MSRB2	1.30571e-40	0.541752	0.188	0.613	3.89037e-36	Singlet	MSRB2
RPL41	8.71848e-40	0.891713	0.883	0.938	2.59767e-35	Singlet	RPL41
HMGN3	1.72568e-39	0.63361	0.138	0.522	5.14166e-35	Singlet	HMGN3
RCN2	3.54568e-37	0.621602	0.2	0.613	1.05644e-32	Singlet	RCN2
SPP1	3.63937e-37	1.42424	0.869	0.889	1.08435e-32	Singlet	SPP1
KIF2A	5.40421e-37	0.575889	0.165	0.545	1.61019e-32	Singlet	KIF2A
ERGIC3	5.85352e-37	0.728116	0.193	0.596	1.74406e-32	Singlet	ERGIC3
RPS18	6.55029e-36	2.08837	0.746	0.862	1.95166e-31	Singlet	RPS18
PDE4D	7.19007e-36	0.5864	0.22	0.646	2.14228e-31	Singlet	PDE4D
CCDC107	9.23159e-36	0.571103	0.202	0.604	2.75055e-31	Singlet	CCDC107
EEF1A1	1.3382e-35	1.03943	0.831	0.932	3.98717e-31	Singlet	EEF1A1
SYAP1	1.77912e-35	0.611547	0.185	0.587	5.30089e-31	Singlet	SYAP1
RPS2	4.60041e-35	1.46912	0.788	0.902	1.37069e-30	Singlet	RPS2
DNAJC7	1.09782e-34	0.504073	0.255	0.712	3.27095e-30	Singlet	DNAJC7
S100A13	1.92022e-34	0.966314	0.192	0.596	5.7213e-30	Singlet	S100A13
GOLIM4	2.80736e-34	0.920812	0.203	0.6	8.36452e-30	Singlet	GOLIM4
RPL28	4.1278e-34	1.21177	0.784	0.912	1.22988e-29	Singlet	RPL28
IFI30	5.66292e-34	4.83439	0.659	0.662	1.68727e-29	Singlet	IFI30
CD151	2.48686e-33	0.696109	0.154	0.515	7.40961e-29	Singlet	CD151
PNRC2	5.6845e-33	0.554893	0.217	0.623	1.6937e-28	Singlet	PNRC2
NDUFS1	5.82614e-33	0.502801	0.152	0.509	1.7359e-28	Singlet	NDUFS1
EAPP	5.89122e-33	0.711144	0.168	0.541	1.75529e-28	Singlet	EAPP
TADA3	8.82532e-33	0.568348	0.178	0.554	2.6295e-28	Singlet	TADA3
RBBP7	1.26606e-32	0.561202	0.173	0.534	3.77222e-28	Singlet	RBBP7
CEBPD	1.43983e-32	0.532288	0.154	0.505	4.28998e-28	Singlet	CEBPD
DDOST	2.21246e-32	0.545774	0.22	0.629	6.59204e-28	Singlet	DDOST
GBP1	3.09097e-32	0.525087	0.207	0.606	9.20955e-28	Singlet	GBP1
SAR1B	3.12279e-32	0.59358	0.226	0.642	9.30434e-28	Singlet	SAR1B
DDX46	4.76452e-32	0.557702	0.281	0.721	1.41959e-27	Singlet	DDX46
RECQL	5.22705e-32	0.560694	0.206	0.596	1.5574e-27	Singlet	RECQL
CDC5L	8.05758e-32	0.504816	0.244	0.663	2.40076e-27	Singlet	CDC5L
GOLGA2	8.61911e-32	0.767677	0.152	0.502	2.56806e-27	Singlet	GOLGA2
EIF4E2	9.30561e-32	0.646872	0.179	0.551	2.77261e-27	Singlet	EIF4E2
PIGP	1.18567e-31	0.619202	0.157	0.506	3.5327e-27	Singlet	PIGP
CNIH1	1.43916e-31	0.504948	0.186	0.561	4.28799e-27	Singlet	CNIH1
BEST1	1.50284e-31	0.792028	0.262	0.685	4.47772e-27	Singlet	BEST1
DPY30	1.57369e-31	0.569438	0.2	0.577	4.68881e-27	Singlet	DPY30
ATG12	3.0723e-31	0.51245	0.195	0.571	9.15391e-27	Singlet	ATG12
IAH1	3.94758e-31	0.617991	0.182	0.545	1.17618e-26	Singlet	IAH1
CDC26	4.96949e-31	0.635111	0.248	0.666	1.48066e-26	Singlet	CDC26
RSRC2	6.95581e-31	0.603108	0.267	0.704	2.07248e-26	Singlet	RSRC2
IFI27L2	8.97723e-31	0.54946	0.227	0.624	2.67477e-26	Singlet	IFI27L2
NDUFA5	1.04736e-30	0.605198	0.209	0.593	3.12062e-26	Singlet	NDUFA5
NUDT14	1.37136e-30	0.589104	0.171	0.522	4.08595e-26	Singlet	NUDT14
SERPINB6	1.51006e-30	0.55037	0.285	0.744	4.49924e-26	Singlet	SERPINB6
RPL11	2.56476e-30	1.25411	0.757	0.904	7.6417e-26	Singlet	RPL11
GOLGA7	2.84481e-30	0.579562	0.165	0.509	8.47611e-26	Singlet	GOLGA7
GLTP	3.22229e-30	0.596666	0.173	0.529	9.60081e-26	Singlet	GLTP
RPL10	4.19755e-30	1.52995	0.739	0.878	1.25066e-25	Singlet	RPL10
NAP1L4	4.30397e-30	0.755034	0.169	0.518	1.28237e-25	Singlet	NAP1L4
MORF4L2	4.82788e-30	0.768362	0.251	0.665	1.43847e-25	Singlet	MORF4L2
TMEM167A	7.44254e-30	0.508588	0.298	0.748	2.21751e-25	Singlet	TMEM167A
C14orf119	1.40733e-29	0.5668	0.213	0.606	4.19314e-25	Singlet	C14orf119
CHORDC1	1.54581e-29	0.50006	0.189	0.557	4.60575e-25	Singlet	CHORDC1
DYNC1LI2	1.57186e-29	0.612394	0.166	0.505	4.68335e-25	Singlet	DYNC1LI2
RPL26	1.62877e-29	2.10635	0.677	0.783	4.85291e-25	Singlet	RPL26
SLU7	1.78865e-29	0.668849	0.171	0.521	5.32927e-25	Singlet	SLU7
NDUFB6	1.87631e-29	0.528068	0.247	0.656	5.59047e-25	Singlet	NDUFB6
LSM6	2.14053e-29	0.646675	0.207	0.59	6.37772e-25	Singlet	LSM6
PSMD11	2.63939e-29	0.71524	0.221	0.624	7.86405e-25	Singlet	PSMD11
SSU72	3.17919e-29	0.532558	0.228	0.622	9.4724e-25	Singlet	SSU72
JUND	3.43166e-29	0.654516	0.289	0.715	1.02246e-24	Singlet	JUND
ARF3	3.44483e-29	0.516615	0.23	0.616	1.02639e-24	Singlet	ARF3
CCDC25	3.58804e-29	0.704076	0.196	0.554	1.06906e-24	Singlet	CCDC25
POLR2G	5.40627e-29	0.70304	0.197	0.565	1.6108e-24	Singlet	POLR2G
SMU1	6.04618e-29	0.646042	0.23	0.614	1.80146e-24	Singlet	SMU1
RPS8	6.05212e-29	1.4892	0.733	0.876	1.80323e-24	Singlet	RPS8
METAP2	7.4871e-29	0.705007	0.252	0.676	2.23078e-24	Singlet	METAP2
CARD16	8.82355e-29	0.60221	0.171	0.511	2.62898e-24	Singlet	CARD16
RAD23B	1.01892e-28	0.699651	0.236	0.635	3.03587e-24	Singlet	RAD23B
SNRNP70	1.13065e-28	0.768572	0.179	0.528	3.36876e-24	Singlet	SNRNP70
SRSF2	1.27776e-28	0.683054	0.195	0.564	3.80708e-24	Singlet	SRSF2
TSFM	1.55405e-28	0.86275	0.173	0.518	4.63028e-24	Singlet	TSFM
ASPH	1.62563e-28	1.06169	0.169	0.508	4.84357e-24	Singlet	ASPH
CWC15	1.64189e-28	0.536602	0.251	0.66	4.89202e-24	Singlet	CWC15
SMIM7	1.69992e-28	0.930801	0.206	0.574	5.0649e-24	Singlet	SMIM7
YY1	1.84817e-28	0.63516	0.296	0.731	5.50663e-24	Singlet	YY1
MRPL47	2.09675e-28	0.509122	0.199	0.56	6.24726e-24	Singlet	MRPL47
PPIL4	3.17349e-28	0.77283	0.22	0.593	9.4554e-24	Singlet	PPIL4
ARCN1	3.37961e-28	0.523469	0.2	0.567	1.00695e-23	Singlet	ARCN1
EIF2AK1	3.87441e-28	0.535046	0.183	0.527	1.15438e-23	Singlet	EIF2AK1
ADSS	4.52063e-28	0.837493	0.189	0.537	1.34692e-23	Singlet	ADSS
UFD1	7.02064e-28	0.642056	0.203	0.567	2.0918e-23	Singlet	UFD1
SURF4	7.734e-28	0.572467	0.197	0.553	2.30435e-23	Singlet	SURF4
HNRNPH2	7.92821e-28	0.539256	0.202	0.564	2.36221e-23	Singlet	HNRNPH2
NDUFS3	9.56311e-28	0.539424	0.178	0.519	2.84933e-23	Singlet	NDUFS3
SRP72	1.06152e-27	0.565062	0.192	0.541	3.16279e-23	Singlet	SRP72
TMEM147	1.08279e-27	0.54593	0.274	0.701	3.22618e-23	Singlet	TMEM147
EIF3H	1.10434e-27	0.519176	0.3	0.74	3.29038e-23	Singlet	EIF3H
RPL30	1.13643e-27	1.45319	0.749	0.879	3.38599e-23	Singlet	RPL30
CBR1	1.18849e-27	0.832973	0.214	0.588	3.5411e-23	Singlet	CBR1
TMED4	1.30627e-27	0.607711	0.269	0.686	3.89202e-23	Singlet	TMED4
COQ10B	1.65839e-27	0.577689	0.209	0.578	4.94117e-23	Singlet	COQ10B
LSM10	1.7085e-27	0.537366	0.209	0.567	5.09049e-23	Singlet	LSM10
LSM12	1.8536e-27	0.598523	0.207	0.567	5.5228e-23	Singlet	LSM12
NONO	2.56915e-27	0.759987	0.217	0.583	7.65477e-23	Singlet	NONO
MZT2B	3.11511e-27	0.739626	0.269	0.694	9.28146e-23	Singlet	MZT2B
ZC3H15	3.15509e-27	0.58745	0.265	0.691	9.40058e-23	Singlet	ZC3H15
DSTN	3.81445e-27	0.695168	0.275	0.699	1.13652e-22	Singlet	DSTN
TMEM230	4.50969e-27	0.511579	0.274	0.712	1.34366e-22	Singlet	TMEM230
MEA1	5.25195e-27	0.666683	0.217	0.584	1.56482e-22	Singlet	MEA1
POLR2I	5.89082e-27	0.693873	0.192	0.534	1.75517e-22	Singlet	POLR2I
TIMM8B	6.27178e-27	0.877086	0.233	0.622	1.86868e-22	Singlet	TIMM8B
HNRNPH1	6.36135e-27	0.658315	0.271	0.694	1.89537e-22	Singlet	HNRNPH1
PRKDC	9.54718e-27	0.831269	0.227	0.6	2.84458e-22	Singlet	PRKDC
GTF3A	1.08489e-26	0.609615	0.26	0.66	3.23243e-22	Singlet	GTF3A
COPRS	1.12546e-26	0.744993	0.19	0.548	3.35331e-22	Singlet	COPRS
POLR2J	1.32707e-26	0.552483	0.278	0.689	3.954e-22	Singlet	POLR2J
HAT1	1.78704e-26	0.744008	0.189	0.525	5.3245e-22	Singlet	HAT1
NUDT9	1.79492e-26	0.542911	0.178	0.509	5.34798e-22	Singlet	NUDT9
ATF3	1.84206e-26	0.964001	0.214	0.583	5.48842e-22	Singlet	ATF3
DARS	2.16405e-26	0.635596	0.233	0.619	6.44778e-22	Singlet	DARS
UBE2N	2.18478e-26	0.582488	0.252	0.647	6.50955e-22	Singlet	UBE2N
NUDC	2.28666e-26	0.694162	0.237	0.637	6.81309e-22	Singlet	NUDC
POLR2F	2.47552e-26	0.627388	0.223	0.599	7.3758e-22	Singlet	POLR2F
MRFAP1	2.53171e-26	0.554693	0.279	0.695	7.54324e-22	Singlet	MRFAP1
NKAP	2.87365e-26	0.671039	0.193	0.537	8.56204e-22	Singlet	NKAP
UFC1	3.66354e-26	0.67565	0.282	0.694	1.09155e-21	Singlet	UFC1
RPS14	3.76854e-26	1.48608	0.714	0.863	1.12284e-21	Singlet	RPS14
DNAJA2	7.30483e-26	0.793329	0.267	0.662	2.17647e-21	Singlet	DNAJA2
TIAL1	7.60827e-26	0.6274	0.21	0.56	2.26689e-21	Singlet	TIAL1
MRPL43	7.70856e-26	0.778293	0.188	0.522	2.29677e-21	Singlet	MRPL43
PSMC1	1.03686e-25	0.682962	0.252	0.655	3.08931e-21	Singlet	PSMC1
COPS2	1.332e-25	1.2657	0.19	0.537	3.96868e-21	Singlet	COPS2
RPA3	1.49458e-25	0.582347	0.206	0.554	4.4531e-21	Singlet	RPA3
EIF4A2	1.54201e-25	0.706976	0.21	0.567	4.59441e-21	Singlet	EIF4A2
RPS15A	1.7298e-25	1.48835	0.712	0.862	5.15395e-21	Singlet	RPS15A
COX14	1.78892e-25	0.764562	0.275	0.673	5.33009e-21	Singlet	COX14
SRSF10	1.84635e-25	0.584298	0.223	0.59	5.50119e-21	Singlet	SRSF10
FAAP20	2.37384e-25	0.776337	0.19	0.531	7.07284e-21	Singlet	FAAP20
SFPQ	2.57999e-25	0.601913	0.21	0.568	7.68707e-21	Singlet	SFPQ
MRPL41	3.42903e-25	0.557533	0.276	0.691	1.02168e-20	Singlet	MRPL41
LDHB	3.6009e-25	0.689991	0.212	0.563	1.07289e-20	Singlet	LDHB
CHMP2A	3.93452e-25	0.508721	0.305	0.745	1.17229e-20	Singlet	CHMP2A
RPS19	4.67605e-25	0.956568	0.808	0.942	1.39323e-20	Singlet	RPS19
SELENOF	4.92224e-25	0.517053	0.339	0.781	1.46658e-20	Singlet	SELENOF
PSMD2	5.59156e-25	0.536746	0.261	0.675	1.666e-20	Singlet	PSMD2
DENR	6.19943e-25	0.67623	0.224	0.584	1.84712e-20	Singlet	DENR
RPL13A	6.446e-25	1.2428	0.753	0.898	1.92059e-20	Singlet	RPL13A
ATP5PB	6.8542e-25	0.547936	0.283	0.688	2.04221e-20	Singlet	ATP5PB
EIF4B	7.2199e-25	0.532241	0.267	0.663	2.15117e-20	Singlet	EIF4B
POLR2K	7.67504e-25	0.767743	0.279	0.683	2.28678e-20	Singlet	POLR2K
APP	9.47382e-25	1.14928	0.236	0.609	2.82272e-20	Singlet	APP
ORMDL1	1.00323e-24	0.725496	0.238	0.607	2.98912e-20	Singlet	ORMDL1
FKBP3	1.04574e-24	0.953555	0.254	0.652	3.11577e-20	Singlet	FKBP3
NRBP1	1.17623e-24	0.511358	0.228	0.587	3.50456e-20	Singlet	NRBP1
FUNDC2	1.27085e-24	0.691861	0.189	0.515	3.78651e-20	Singlet	FUNDC2
GLOD4	1.42348e-24	0.554518	0.181	0.505	4.24127e-20	Singlet	GLOD4
NDUFB5	1.82854e-24	0.625864	0.227	0.586	5.44813e-20	Singlet	NDUFB5
RPS6	1.90708e-24	1.56237	0.726	0.876	5.68215e-20	Singlet	RPS6
MIEN1	2.12222e-24	0.758226	0.195	0.518	6.32315e-20	Singlet	MIEN1
CLINT1	2.29054e-24	0.678278	0.202	0.534	6.82468e-20	Singlet	CLINT1
PYURF	2.45831e-24	0.535666	0.228	0.599	7.32452e-20	Singlet	PYURF
SIVA1	2.46754e-24	0.701977	0.226	0.587	7.35203e-20	Singlet	SIVA1
IK	2.75364e-24	0.641977	0.275	0.673	8.20448e-20	Singlet	IK
CLPP	2.78329e-24	0.552511	0.182	0.501	8.29281e-20	Singlet	CLPP
MRPS15	3.04078e-24	0.550374	0.214	0.561	9.06e-20	Singlet	MRPS15
BUD31	3.13306e-24	0.670812	0.281	0.676	9.33494e-20	Singlet	BUD31
ADRM1	3.75838e-24	0.705175	0.238	0.619	1.11981e-19	Singlet	ADRM1
MRPS36	4.27979e-24	0.657412	0.252	0.637	1.27516e-19	Singlet	MRPS36
GTF2A2	4.59462e-24	0.792272	0.293	0.717	1.36897e-19	Singlet	GTF2A2
NAXE	4.69506e-24	0.956071	0.206	0.544	1.39889e-19	Singlet	NAXE
EVI2A	5.18551e-24	0.506715	0.224	0.571	1.54502e-19	Singlet	EVI2A
IFNAR2	5.20317e-24	0.876962	0.192	0.519	1.55029e-19	Singlet	IFNAR2
SRP9	5.27115e-24	0.531496	0.288	0.692	1.57054e-19	Singlet	SRP9
VKORC1	5.78201e-24	0.718885	0.279	0.672	1.72275e-19	Singlet	VKORC1
PCNP	6.36208e-24	0.730492	0.26	0.643	1.89558e-19	Singlet	PCNP
COPZ1	7.2501e-24	0.637866	0.261	0.659	2.16017e-19	Singlet	COPZ1
MRPL57	8.81075e-24	0.699634	0.267	0.656	2.62516e-19	Singlet	MRPL57
ARPC5L	9.1739e-24	0.779359	0.188	0.512	2.73336e-19	Singlet	ARPC5L
KDELR2	9.81491e-24	0.591075	0.295	0.721	2.92435e-19	Singlet	KDELR2
POLR3GL	1.8166e-23	0.616922	0.233	0.591	5.41255e-19	Singlet	POLR3GL
DERL1	1.99365e-23	0.762462	0.188	0.509	5.94007e-19	Singlet	DERL1
PSMC6	2.0023e-23	0.61523	0.252	0.626	5.96586e-19	Singlet	PSMC6
RHOC	2.07716e-23	0.669303	0.327	0.75	6.18891e-19	Singlet	RHOC
MRPL13	2.18479e-23	0.819684	0.258	0.639	6.50957e-19	Singlet	MRPL13
PSMC4	2.70427e-23	0.501723	0.217	0.57	8.05738e-19	Singlet	PSMC4
SNRPF	2.78135e-23	0.641754	0.262	0.662	8.28702e-19	Singlet	SNRPF
CAMLG	3.22619e-23	0.819372	0.2	0.538	9.61242e-19	Singlet	CAMLG
BNIP3L	3.63188e-23	0.567411	0.36	0.81	1.08212e-18	Singlet	BNIP3L
SLIRP	3.65084e-23	0.758296	0.282	0.691	1.08777e-18	Singlet	SLIRP
TCEAL4	4.13226e-23	0.618517	0.324	0.737	1.23121e-18	Singlet	TCEAL4
STMP1	4.49472e-23	0.898198	0.281	0.673	1.3392e-18	Singlet	STMP1
SBDS	4.67188e-23	0.752838	0.254	0.629	1.39199e-18	Singlet	SBDS
DNTTIP2	4.88485e-23	0.699493	0.217	0.564	1.45544e-18	Singlet	DNTTIP2
RPS23	5.35703e-23	1.46711	0.722	0.879	1.59613e-18	Singlet	RPS23
SRSF3	5.87039e-23	0.652282	0.288	0.704	1.74908e-18	Singlet	SRSF3
SMIM15	5.96223e-23	0.546119	0.195	0.525	1.77645e-18	Singlet	SMIM15
ECH1	6.15586e-23	0.988219	0.22	0.571	1.83414e-18	Singlet	ECH1
UBE2F	7.40891e-23	0.929772	0.251	0.629	2.20749e-18	Singlet	UBE2F
TRAPPC3	7.44596e-23	0.724519	0.255	0.627	2.21852e-18	Singlet	TRAPPC3
PRDX6	1.15631e-22	0.829588	0.312	0.722	3.44521e-18	Singlet	PRDX6
CH25H	1.18875e-22	0.586487	0.206	0.531	3.54188e-18	Singlet	CH25H
MRPL34	1.18891e-22	0.560943	0.264	0.645	3.54235e-18	Singlet	MRPL34
TRAPPC2L	1.19289e-22	0.735425	0.21	0.551	3.55422e-18	Singlet	TRAPPC2L
SEC11A	1.20335e-22	0.687658	0.31	0.741	3.58539e-18	Singlet	SEC11A
SEPHS2	1.2989e-22	0.581157	0.234	0.584	3.87006e-18	Singlet	SEPHS2
NDUFS6	1.33213e-22	0.549962	0.298	0.721	3.96908e-18	Singlet	NDUFS6
PCMT1	1.44818e-22	0.510744	0.286	0.685	4.31486e-18	Singlet	PCMT1
PPP4C	1.627e-22	0.582033	0.271	0.656	4.84764e-18	Singlet	PPP4C
NDUFA2	1.68474e-22	0.707728	0.269	0.647	5.01967e-18	Singlet	NDUFA2
EID1	1.92135e-22	1.12372	0.238	0.6	5.72467e-18	Singlet	EID1
DYNLT1	1.94044e-22	0.506321	0.343	0.778	5.78155e-18	Singlet	DYNLT1
LAMTOR2	2.1557e-22	0.526733	0.334	0.742	6.4229e-18	Singlet	LAMTOR2
PSMB7	2.17411e-22	0.711292	0.275	0.675	6.47776e-18	Singlet	PSMB7
MRPS16	2.35465e-22	0.512271	0.258	0.629	7.01567e-18	Singlet	MRPS16
PSMA3	2.44339e-22	0.598282	0.312	0.745	7.28008e-18	Singlet	PSMA3
ZNHIT1	3.22464e-22	0.976355	0.221	0.558	9.60783e-18	Singlet	ZNHIT1
TAF10	3.35991e-22	0.892845	0.278	0.671	1.00108e-17	Singlet	TAF10
RWDD1	3.64744e-22	0.832046	0.282	0.675	1.08676e-17	Singlet	RWDD1
PBDC1	3.76687e-22	1.09588	0.21	0.542	1.12234e-17	Singlet	PBDC1
HSPA1A	3.84185e-22	0.998741	0.21	0.557	1.14468e-17	Singlet	HSPA1A
SNRPB2	3.99979e-22	0.546577	0.309	0.728	1.19174e-17	Singlet	SNRPB2
SUPT16H	4.36452e-22	0.960473	0.271	0.645	1.30041e-17	Singlet	SUPT16H
MAGOH	4.48421e-22	0.833337	0.243	0.601	1.33607e-17	Singlet	MAGOH
MRPL20	5.34426e-22	0.60319	0.276	0.65	1.59232e-17	Singlet	MRPL20
PGAM1	5.49061e-22	0.66427	0.238	0.612	1.63593e-17	Singlet	PGAM1
MRPL33	5.53394e-22	0.687928	0.248	0.617	1.64884e-17	Singlet	MRPL33
TMEM208	5.62464e-22	0.730927	0.274	0.672	1.67586e-17	Singlet	TMEM208
NDUFS7	5.8867e-22	0.598467	0.241	0.594	1.75394e-17	Singlet	NDUFS7
AURKAIP1	5.89944e-22	0.763472	0.293	0.692	1.75774e-17	Singlet	AURKAIP1
EIF2S3	6.01242e-22	0.58632	0.197	0.518	1.7914e-17	Singlet	EIF2S3
EMC6	6.60923e-22	0.750828	0.227	0.576	1.96922e-17	Singlet	EMC6
UFM1	7.42093e-22	0.804072	0.278	0.666	2.21107e-17	Singlet	UFM1
RAC2	8.63867e-22	0.645681	0.202	0.517	2.57389e-17	Singlet	RAC2
YWHAQ	9.28311e-22	1.10479	0.24	0.604	2.7659e-17	Singlet	YWHAQ
ZNF22	1.02497e-21	0.719119	0.213	0.529	3.05389e-17	Singlet	ZNF22
NDUFB7	1.44762e-21	0.506729	0.333	0.742	4.31318e-17	Singlet	NDUFB7
OAS1	1.49869e-21	0.616037	0.241	0.6	4.46536e-17	Singlet	OAS1
ATRAID	1.5736e-21	0.645025	0.331	0.742	4.68854e-17	Singlet	ATRAID
EIF4A3	1.70986e-21	0.743372	0.207	0.538	5.09454e-17	Singlet	EIF4A3
CIB1	1.77586e-21	0.591741	0.355	0.767	5.29118e-17	Singlet	CIB1
LMAN1	2.1237e-21	0.678424	0.34	0.764	6.32758e-17	Singlet	LMAN1
MED10	2.37555e-21	0.806707	0.197	0.509	7.07794e-17	Singlet	MED10
SNRPG	2.59811e-21	0.581381	0.316	0.742	7.74106e-17	Singlet	SNRPG
TXNL4A	2.8274e-21	0.752417	0.233	0.581	8.42423e-17	Singlet	TXNL4A
CORO1A	2.93943e-21	0.53221	0.209	0.527	8.75803e-17	Singlet	CORO1A
PDAP1	3.03021e-21	0.579938	0.292	0.685	9.02852e-17	Singlet	PDAP1
PPP1R15A	4.11393e-21	0.795799	0.333	0.774	1.22575e-16	Singlet	PPP1R15A
PGLS	4.54535e-21	0.577147	0.268	0.626	1.35429e-16	Singlet	PGLS
TIPRL	5.17585e-21	0.55143	0.24	0.578	1.54215e-16	Singlet	TIPRL
TMEM14B	5.47559e-21	0.6534	0.31	0.708	1.63145e-16	Singlet	TMEM14B
ABCF1	5.75891e-21	0.63715	0.24	0.59	1.71587e-16	Singlet	ABCF1
SRSF7	6.03982e-21	0.76866	0.217	0.55	1.79956e-16	Singlet	SRSF7
SNRPC	6.10467e-21	0.727632	0.233	0.576	1.81889e-16	Singlet	SNRPC
LST1	6.25425e-21	0.510803	0.3	0.699	1.86345e-16	Singlet	LST1
GTF2H5	6.37266e-21	0.814312	0.216	0.54	1.89874e-16	Singlet	GTF2H5
CBX3	6.75165e-21	0.566432	0.306	0.732	2.01165e-16	Singlet	CBX3
COPS9	6.92949e-21	0.761647	0.296	0.681	2.06464e-16	Singlet	COPS9
PSMC5	7.60222e-21	0.705667	0.269	0.652	2.26508e-16	Singlet	PSMC5
MRPL40	7.76016e-21	0.81519	0.226	0.563	2.31214e-16	Singlet	MRPL40
NDUFB9	8.99772e-21	0.656389	0.316	0.735	2.68087e-16	Singlet	NDUFB9
ANP32E	9.56349e-21	0.755831	0.238	0.573	2.84944e-16	Singlet	ANP32E
HSPA5	9.916e-21	0.994869	0.365	0.819	2.95447e-16	Singlet	HSPA5
HERC5	1.068e-20	0.652414	0.262	0.63	3.1821e-16	Singlet	HERC5
CALU	1.06983e-20	1.04094	0.305	0.708	3.18755e-16	Singlet	CALU
LSM5	1.23829e-20	0.920736	0.237	0.576	3.6895e-16	Singlet	LSM5
EMC4	2.02577e-20	0.537861	0.209	0.537	6.03577e-16	Singlet	EMC4
METTL5	2.13744e-20	0.597178	0.228	0.56	6.36849e-16	Singlet	METTL5
SSR3	2.26102e-20	0.704487	0.316	0.74	6.73672e-16	Singlet	SSR3
TMEM256	2.4723e-20	0.657878	0.2	0.509	7.36622e-16	Singlet	TMEM256
UBE2L3	3.41231e-20	0.654521	0.347	0.764	1.0167e-15	Singlet	UBE2L3
UBE2L6	4.12231e-20	0.812786	0.238	0.58	1.22824e-15	Singlet	UBE2L6
NASP	4.14377e-20	1.09416	0.252	0.596	1.23464e-15	Singlet	NASP
NDUFC1	4.14596e-20	0.515402	0.286	0.665	1.23529e-15	Singlet	NDUFC1
TUBB4B	4.46581e-20	0.642959	0.248	0.6	1.33059e-15	Singlet	TUBB4B
KRR1	4.76028e-20	0.580886	0.202	0.508	1.41833e-15	Singlet	KRR1
MTPN	4.93231e-20	0.641631	0.354	0.791	1.46958e-15	Singlet	MTPN
LSM4	5.40935e-20	0.886906	0.238	0.593	1.61172e-15	Singlet	LSM4
STRAP	5.58166e-20	0.652785	0.197	0.508	1.66306e-15	Singlet	STRAP
SELENOK	5.939e-20	0.815035	0.31	0.721	1.76953e-15	Singlet	SELENOK
CCT7	6.69273e-20	0.776034	0.195	0.508	1.9941e-15	Singlet	CCT7
RPL32	7.27325e-20	1.34668	0.707	0.875	2.16707e-15	Singlet	RPL32
OSTC	7.86362e-20	0.783204	0.262	0.617	2.34296e-15	Singlet	OSTC
PSMD7	1.0486e-19	0.772981	0.312	0.722	3.1243e-15	Singlet	PSMD7
RAD23A	1.26166e-19	0.724268	0.292	0.706	3.75912e-15	Singlet	RAD23A
PSMB8	1.35264e-19	0.721582	0.302	0.717	4.03018e-15	Singlet	PSMB8
ARPC1A	1.38569e-19	0.713179	0.202	0.509	4.12865e-15	Singlet	ARPC1A
CHCHD10	1.44959e-19	0.852104	0.279	0.65	4.31906e-15	Singlet	CHCHD10
EIF3D	1.50873e-19	0.80669	0.251	0.6	4.49525e-15	Singlet	EIF3D
ARF4	2.06054e-19	0.637006	0.357	0.78	6.13937e-15	Singlet	ARF4
SQOR	2.13193e-19	0.887916	0.282	0.675	6.35208e-15	Singlet	SQOR
MRPS10	2.13378e-19	0.623591	0.212	0.521	6.35759e-15	Singlet	MRPS10
FNIP1	2.23914e-19	1.06513	0.254	0.604	6.67153e-15	Singlet	FNIP1
EPRS	2.42036e-19	0.884053	0.206	0.515	7.21145e-15	Singlet	EPRS
SLC25A11	2.55535e-19	0.72436	0.2	0.506	7.61367e-15	Singlet	SLC25A11
BANF1	2.66746e-19	0.830446	0.24	0.586	7.94771e-15	Singlet	BANF1
RPS28	2.7616e-19	0.897716	0.777	0.921	8.22818e-15	Singlet	RPS28
TMED2	3.11247e-19	0.748546	0.319	0.711	9.27362e-15	Singlet	TMED2
CCL3L1	4.16523e-19	1.24489	0.302	0.663	1.24103e-14	Singlet	CCL3L1
ARL6IP4	4.17507e-19	0.699801	0.333	0.755	1.24396e-14	Singlet	ARL6IP4
SSR2	4.24179e-19	0.694227	0.346	0.771	1.26384e-14	Singlet	SSR2
PSMB5	4.84882e-19	0.774875	0.26	0.617	1.44471e-14	Singlet	PSMB5
RNF7	5.55382e-19	0.582821	0.312	0.708	1.65476e-14	Singlet	RNF7
MESD	7.14027e-19	0.504315	0.377	0.786	2.12744e-14	Singlet	MESD
SRPRA	7.49417e-19	0.809822	0.258	0.61	2.23289e-14	Singlet	SRPRA
CDK4	7.78997e-19	0.775113	0.2	0.504	2.32102e-14	Singlet	CDK4
CCT8	8.08987e-19	0.817031	0.278	0.662	2.41038e-14	Singlet	CCT8
JTB	8.92718e-19	0.549244	0.341	0.748	2.65985e-14	Singlet	JTB
DUSP23	9.35767e-19	0.911253	0.219	0.529	2.78812e-14	Singlet	DUSP23
MYDGF	9.60231e-19	0.541915	0.337	0.765	2.86101e-14	Singlet	MYDGF
TMEM70	1.00911e-18	1.02476	0.221	0.54	3.00665e-14	Singlet	TMEM70
PPM1G	1.08767e-18	0.681173	0.285	0.66	3.24072e-14	Singlet	PPM1G
RNF181	1.12054e-18	0.591177	0.344	0.758	3.33866e-14	Singlet	RNF181
TUFM	1.1626e-18	0.831404	0.243	0.577	3.46397e-14	Singlet	TUFM
EIF6	1.20248e-18	0.851313	0.245	0.584	3.58278e-14	Singlet	EIF6
ESF1	1.23272e-18	0.996871	0.217	0.527	3.67289e-14	Singlet	ESF1
BLVRB	1.45921e-18	0.750316	0.286	0.666	4.34771e-14	Singlet	BLVRB
POLR2L	1.51037e-18	0.726449	0.268	0.619	4.50014e-14	Singlet	POLR2L
BAG1	1.6433e-18	0.753494	0.254	0.586	4.89623e-14	Singlet	BAG1
LSM7	1.70056e-18	0.622677	0.205	0.505	5.06682e-14	Singlet	LSM7
RPS4Y1	1.77447e-18	1.09653	0.269	0.64	5.28704e-14	Singlet	RPS4Y1
HNRNPDL	2.11375e-18	0.686069	0.323	0.734	6.29793e-14	Singlet	HNRNPDL
RPS27A	2.13577e-18	1.10612	0.722	0.891	6.36353e-14	Singlet	RPS27A
RNASEH2C	2.58751e-18	0.609807	0.236	0.56	7.70947e-14	Singlet	RNASEH2C
TMEM258	3.10868e-18	0.639823	0.334	0.74	9.2623e-14	Singlet	TMEM258
ARHGDIB	4.58139e-18	0.533494	0.302	0.653	1.36503e-13	Singlet	ARHGDIB
CCT6A	5.22969e-18	0.874656	0.299	0.692	1.55819e-13	Singlet	CCT6A
C1QBP	6.96715e-18	0.628257	0.207	0.515	2.07586e-13	Singlet	C1QBP
IFI35	7.17862e-18	1.09233	0.255	0.596	2.13887e-13	Singlet	IFI35
EIF3E	7.48169e-18	0.958162	0.286	0.665	2.22917e-13	Singlet	EIF3E
CUTA	7.99334e-18	0.822138	0.212	0.512	2.38161e-13	Singlet	CUTA
SRRM1	8.35839e-18	0.509709	0.385	0.814	2.49038e-13	Singlet	SRRM1
EIF3G	8.94837e-18	0.63571	0.24	0.574	2.66617e-13	Singlet	EIF3G
ATP5F1B	1.00557e-17	0.72242	0.309	0.702	2.99608e-13	Singlet	ATP5F1B
SF3B5	1.01745e-17	0.941884	0.245	0.573	3.03149e-13	Singlet	SF3B5
DEK	1.07319e-17	0.761599	0.358	0.801	3.19757e-13	Singlet	DEK
RPS20	1.09572e-17	0.889206	0.743	0.911	3.26468e-13	Singlet	RPS20
DDX24	1.5215e-17	0.641641	0.348	0.761	4.5333e-13	Singlet	DDX24
EIF1B	1.66272e-17	0.658088	0.364	0.776	4.95406e-13	Singlet	EIF1B
HNRNPAB	2.07544e-17	0.938713	0.252	0.584	6.18376e-13	Singlet	HNRNPAB
SNRPD1	2.13178e-17	0.9133	0.22	0.531	6.35164e-13	Singlet	SNRPD1
GSPT1	2.622e-17	1.07459	0.22	0.522	7.81226e-13	Singlet	GSPT1
SUMO1	2.70863e-17	0.726754	0.346	0.748	8.07037e-13	Singlet	SUMO1
VIM	2.93357e-17	0.729521	0.824	0.945	8.74058e-13	Singlet	VIM
TPT1	2.98719e-17	0.631453	0.855	0.953	8.90034e-13	Singlet	TPT1
CKLF	3.46481e-17	0.65197	0.299	0.66	1.03234e-12	Singlet	CKLF
RPL18A	3.58254e-17	1.90037	0.652	0.817	1.06742e-12	Singlet	RPL18A
PSMA5	4.37129e-17	0.812898	0.276	0.639	1.30243e-12	Singlet	PSMA5
MRPS34	4.63625e-17	1.00469	0.214	0.512	1.38137e-12	Singlet	MRPS34
EGR1	4.86702e-17	1.01638	0.281	0.624	1.45013e-12	Singlet	EGR1
ERO1A	4.89058e-17	0.760418	0.271	0.626	1.45715e-12	Singlet	ERO1A
AIMP1	5.26962e-17	0.982854	0.209	0.508	1.57008e-12	Singlet	AIMP1
PA2G4	6.26801e-17	0.800591	0.255	0.594	1.86755e-12	Singlet	PA2G4
DDX18	6.65891e-17	0.579009	0.271	0.609	1.98402e-12	Singlet	DDX18
ATP5IF1	6.81661e-17	0.652784	0.354	0.75	2.03101e-12	Singlet	ATP5IF1
CCT5	7.73646e-17	0.863153	0.319	0.731	2.30508e-12	Singlet	CCT5
TAF9	8.62394e-17	0.925006	0.213	0.514	2.5695e-12	Singlet	TAF9
CHMP3	9.74946e-17	1.30394	0.245	0.564	2.90485e-12	Singlet	CHMP3
MRPS21	1.01927e-16	0.975779	0.271	0.612	3.03693e-12	Singlet	MRPS21
HNRNPA1	1.05804e-16	0.765041	0.248	0.58	3.15243e-12	Singlet	HNRNPA1
ACADVL	1.06977e-16	0.62373	0.254	0.583	3.18737e-12	Singlet	ACADVL
SERPINA1	1.17699e-16	0.590107	0.226	0.534	3.50684e-12	Singlet	SERPINA1
CCT4	1.26715e-16	0.762456	0.262	0.603	3.77548e-12	Singlet	CCT4
ERH	1.27456e-16	0.786534	0.339	0.753	3.79756e-12	Singlet	ERH
TBCA	1.41593e-16	0.567739	0.396	0.813	4.21876e-12	Singlet	TBCA
TRIR	1.49636e-16	0.608547	0.35	0.761	4.45841e-12	Singlet	TRIR
PSMB4	1.68384e-16	1.03976	0.305	0.681	5.017e-12	Singlet	PSMB4
NDUFAB1	1.71142e-16	0.887988	0.31	0.692	5.09919e-12	Singlet	NDUFAB1
VDAC2	2.05282e-16	0.890981	0.295	0.668	6.11638e-12	Singlet	VDAC2
HAX1	3.02501e-16	0.947678	0.221	0.514	9.013e-12	Singlet	HAX1
RPL6	3.3872e-16	1.46533	0.68	0.871	1.00922e-11	Singlet	RPL6
AMD1	4.11068e-16	1.10119	0.237	0.547	1.22478e-11	Singlet	AMD1
SRI	4.52785e-16	0.861492	0.305	0.675	1.34907e-11	Singlet	SRI
HEBP2	4.59455e-16	0.777887	0.251	0.573	1.36895e-11	Singlet	HEBP2
H1F0	5.04078e-16	0.930079	0.245	0.558	1.5019e-11	Singlet	H1F0
RPL15	6.5465e-16	0.946426	0.725	0.899	1.95053e-11	Singlet	RPL15
PRDX4	6.78218e-16	1.24236	0.25	0.573	2.02075e-11	Singlet	PRDX4
DRAP1	7.69002e-16	0.663716	0.344	0.755	2.29124e-11	Singlet	DRAP1
ATP5MC2	8.9671e-16	0.503226	0.391	0.796	2.67175e-11	Singlet	ATP5MC2
EIF3F	9.21583e-16	1.03667	0.245	0.561	2.74586e-11	Singlet	EIF3F
TUBA1A	1.17025e-15	1.45724	0.255	0.563	3.48675e-11	Singlet	TUBA1A
MRPL14	1.64023e-15	0.96379	0.257	0.576	4.88708e-11	Singlet	MRPL14
SF3B6	1.74227e-15	0.824732	0.339	0.728	5.19109e-11	Singlet	SF3B6
SNRPB	1.76761e-15	0.759335	0.278	0.633	5.26659e-11	Singlet	SNRPB
ATP5F1D	1.99061e-15	1.03935	0.281	0.635	5.93102e-11	Singlet	ATP5F1D
C1orf122	2.20369e-15	0.558507	0.386	0.774	6.5659e-11	Singlet	C1orf122
ENY2	2.24158e-15	0.709984	0.339	0.734	6.67879e-11	Singlet	ENY2
MRPL27	2.24518e-15	1.32009	0.221	0.517	6.68951e-11	Singlet	MRPL27
ANP32B	2.37176e-15	0.788974	0.341	0.748	7.06666e-11	Singlet	ANP32B
ELOC	2.63631e-15	0.77974	0.346	0.75	7.85489e-11	Singlet	ELOC
DDT	3.08941e-15	1.07445	0.237	0.541	9.20488e-11	Singlet	DDT
MRPS18C	3.10912e-15	0.891567	0.281	0.623	9.26363e-11	Singlet	MRPS18C
TCEA1	3.11985e-15	0.614264	0.396	0.819	9.29559e-11	Singlet	TCEA1
RTRAF	3.26277e-15	0.706701	0.309	0.679	9.72143e-11	Singlet	RTRAF
SSBP1	3.30412e-15	0.782465	0.351	0.741	9.84464e-11	Singlet	SSBP1
PSME1	3.44971e-15	0.636138	0.334	0.727	1.02784e-10	Singlet	PSME1
IFITM2	3.4882e-15	0.889872	0.241	0.542	1.03931e-10	Singlet	IFITM2
LAMTOR5	3.798e-15	0.555093	0.374	0.773	1.13161e-10	Singlet	LAMTOR5
TOMM20	4.85546e-15	0.93331	0.298	0.675	1.44669e-10	Singlet	TOMM20
TMEM205	6.62437e-15	1.00946	0.23	0.515	1.97373e-10	Singlet	TMEM205
MRPL51	6.75049e-15	1.0427	0.305	0.672	2.01131e-10	Singlet	MRPL51
PSMB2	7.61596e-15	0.938354	0.316	0.699	2.26917e-10	Singlet	PSMB2
CHURC1	8.7056e-15	1.3135	0.244	0.558	2.59383e-10	Singlet	CHURC1
RNH1	1.31621e-14	0.576794	0.317	0.673	3.92165e-10	Singlet	RNH1
KRT10	1.36077e-14	1.11298	0.295	0.629	4.05441e-10	Singlet	KRT10
FKBP1A	1.92853e-14	0.830118	0.231	0.515	5.74607e-10	Singlet	FKBP1A
UXT	2.08008e-14	0.753053	0.327	0.714	6.19759e-10	Singlet	UXT
ATP5PD	2.3497e-14	0.522546	0.368	0.768	7.00092e-10	Singlet	ATP5PD
PLP2	2.37769e-14	0.644825	0.279	0.614	7.08431e-10	Singlet	PLP2
SNRPE	2.93976e-14	1.06973	0.279	0.617	8.75903e-10	Singlet	SNRPE
RPL8	3.13176e-14	1.35727	0.661	0.86	9.33107e-10	Singlet	RPL8
RPL39	3.44102e-14	1.05676	0.707	0.899	1.02525e-09	Singlet	RPL39
XRCC5	3.67124e-14	0.506283	0.433	0.863	1.09385e-09	Singlet	XRCC5
ZFAS1	4.08754e-14	1.14441	0.302	0.652	1.21788e-09	Singlet	ZFAS1
NSA2	4.30575e-14	0.878139	0.283	0.619	1.2829e-09	Singlet	NSA2
CCT3	4.37038e-14	0.865817	0.313	0.688	1.30215e-09	Singlet	CCT3
EIF2S2	4.44473e-14	0.533367	0.398	0.803	1.32431e-09	Singlet	EIF2S2
PARK7	5.25953e-14	0.834476	0.351	0.741	1.56708e-09	Singlet	PARK7
IFIT3	6.59742e-14	0.55857	0.355	0.722	1.9657e-09	Singlet	IFIT3
ARL6IP1	7.21137e-14	0.764558	0.389	0.803	2.14863e-09	Singlet	ARL6IP1
RPS7	7.29688e-14	1.2442	0.677	0.865	2.17411e-09	Singlet	RPS7
RPL7A	1.50067e-13	1.48817	0.667	0.86	4.47126e-09	Singlet	RPL7A
ATF5	2.26691e-13	1.03731	0.24	0.524	6.75426e-09	Singlet	ATF5
APRT	2.30233e-13	0.75818	0.255	0.55	6.8598e-09	Singlet	APRT
COX7B	2.62815e-13	0.600462	0.416	0.82	7.83059e-09	Singlet	COX7B
RPS15	2.6861e-13	1.14964	0.69	0.895	8.00323e-09	Singlet	RPS15
RPS11	2.9091e-13	1.13977	0.68	0.883	8.66765e-09	Singlet	RPS11
RSL24D1	2.93872e-13	1.21214	0.265	0.574	8.75592e-09	Singlet	RSL24D1
UBA52	3.09053e-13	0.959641	0.694	0.895	9.20822e-09	Singlet	UBA52
TUBB	3.11608e-13	0.653919	0.391	0.8	9.28436e-09	Singlet	TUBB
RPS3A	3.49196e-13	1.04509	0.685	0.871	1.04043e-08	Singlet	RPS3A
SSB	3.7367e-13	0.555673	0.389	0.78	1.11335e-08	Singlet	SSB
EIF1	3.92605e-13	0.60998	0.767	0.934	1.16977e-08	Singlet	EIF1
HNRNPA3	4.48503e-13	0.56321	0.416	0.85	1.33631e-08	Singlet	HNRNPA3
NDUFB11	4.48906e-13	1.01072	0.327	0.682	1.33751e-08	Singlet	NDUFB11
CSNK2B	4.82046e-13	1.11288	0.292	0.633	1.43626e-08	Singlet	CSNK2B
SLC25A5	4.87041e-13	0.843175	0.329	0.685	1.45114e-08	Singlet	SLC25A5
NDUFB8	4.94837e-13	0.793813	0.337	0.706	1.47437e-08	Singlet	NDUFB8
WDR83OS	5.35399e-13	0.921422	0.377	0.754	1.59522e-08	Singlet	WDR83OS
PLEK	5.3925e-13	0.689859	0.408	0.806	1.60669e-08	Singlet	PLEK
SPCS1	5.54058e-13	0.633239	0.385	0.778	1.65082e-08	Singlet	SPCS1
HSPB1	5.62394e-13	0.807507	0.378	0.774	1.67565e-08	Singlet	HSPB1
SRP19	7.7174e-13	1.38503	0.305	0.636	2.2994e-08	Singlet	SRP19
ATP5MF	1.00239e-12	0.687428	0.394	0.777	2.98661e-08	Singlet	ATP5MF
UQCRQ	1.0688e-12	0.817936	0.362	0.725	3.18449e-08	Singlet	UQCRQ
NDUFA12	1.36898e-12	0.829961	0.315	0.658	4.07888e-08	Singlet	NDUFA12
EIF3K	1.54629e-12	0.979372	0.348	0.718	4.60716e-08	Singlet	EIF3K
CYC1	1.68083e-12	1.26058	0.234	0.512	5.00802e-08	Singlet	CYC1
HSP90AB1	1.80467e-12	1.14085	0.7	0.891	5.37702e-08	Singlet	HSP90AB1
RPS4X	2.07599e-12	1.58131	0.646	0.82	6.18541e-08	Singlet	RPS4X
PSMB1	2.12355e-12	0.63407	0.386	0.786	6.3271e-08	Singlet	PSMB1
NDUFB4	2.17528e-12	0.678961	0.409	0.812	6.48126e-08	Singlet	NDUFB4
PDIA3	2.27431e-12	0.501529	0.453	0.876	6.7763e-08	Singlet	PDIA3
CNBP	2.55717e-12	0.667265	0.372	0.776	7.6191e-08	Singlet	CNBP
HSBP1	3.1276e-12	0.51046	0.388	0.768	9.3187e-08	Singlet	HSBP1
RPL18	3.19208e-12	1.51534	0.64	0.847	9.5108e-08	Singlet	RPL18
SRSF9	3.24447e-12	0.929364	0.357	0.735	9.6669e-08	Singlet	SRSF9
EDF1	3.75019e-12	0.747869	0.417	0.819	1.11737e-07	Singlet	EDF1
NDUFA6	3.80588e-12	1.09351	0.291	0.622	1.13396e-07	Singlet	NDUFA6
C19orf53	4.02646e-12	0.863847	0.375	0.761	1.19968e-07	Singlet	C19orf53
COX20	4.14929e-12	1.13882	0.236	0.511	1.23628e-07	Singlet	COX20
EIF1AX	5.86239e-12	1.08	0.299	0.626	1.7467e-07	Singlet	EIF1AX
TCP1	6.22255e-12	1.08358	0.258	0.547	1.85401e-07	Singlet	TCP1
RPS10	6.55171e-12	0.986162	0.32	0.666	1.95208e-07	Singlet	RPS10
NUCKS1	6.72632e-12	0.65601	0.443	0.842	2.00411e-07	Singlet	NUCKS1
PHPT1	6.76796e-12	1.26151	0.3	0.62	2.01651e-07	Singlet	PHPT1
TMSB10	8.45264e-12	0.532584	0.893	0.97	2.51847e-07	Singlet	TMSB10
PSMB6	1.16314e-11	0.518589	0.377	0.777	3.46556e-07	Singlet	PSMB6
PSMB3	1.31125e-11	0.572433	0.391	0.791	3.90686e-07	Singlet	PSMB3
SAP18	1.32619e-11	0.63856	0.409	0.82	3.95139e-07	Singlet	SAP18
SNU13	1.68231e-11	1.4054	0.288	0.617	5.01243e-07	Singlet	SNU13
PSMA4	1.69193e-11	0.894826	0.375	0.764	5.04112e-07	Singlet	PSMA4
UQCRH	2.02673e-11	0.832753	0.367	0.745	6.03864e-07	Singlet	UQCRH
COPE	2.31387e-11	0.782165	0.375	0.761	6.89419e-07	Singlet	COPE
EIF5A	4.21386e-11	1.14333	0.306	0.64	1.25552e-06	Singlet	EIF5A
MRPL52	5.44129e-11	1.17632	0.288	0.609	1.62123e-06	Singlet	MRPL52
EEF1D	1.05096e-10	0.815538	0.394	0.788	3.13134e-06	Singlet	EEF1D
SELENOH	1.14841e-10	0.877921	0.361	0.718	3.42168e-06	Singlet	SELENOH
GADD45GIP1	1.15708e-10	1.32148	0.291	0.599	3.44751e-06	Singlet	GADD45GIP1
IFIT1	1.40788e-10	1.39105	0.281	0.57	4.19479e-06	Singlet	IFIT1
PDCD5	2.2142e-10	1.23083	0.306	0.63	6.5972e-06	Singlet	PDCD5
PSME2	2.26955e-10	1.09488	0.346	0.699	6.76213e-06	Singlet	PSME2
TAGLN2	2.97114e-10	1.32726	0.337	0.682	8.85253e-06	Singlet	TAGLN2
ATP5MC3	3.45582e-10	0.656375	0.406	0.773	1.02966e-05	Singlet	ATP5MC3
PFDN2	5.12585e-10	1.60441	0.334	0.688	1.52725e-05	Singlet	PFDN2
BRK1	5.86043e-10	0.628942	0.396	0.771	1.74611e-05	Singlet	BRK1
PSMB9	6.05699e-10	1.12762	0.265	0.532	1.80468e-05	Singlet	PSMB9
SSR4	7.93347e-10	0.936865	0.391	0.773	2.36378e-05	Singlet	SSR4
RPL12	9.71884e-10	1.20876	0.657	0.856	2.89573e-05	Singlet	RPL12
RPL34	1.23662e-09	1.10823	0.666	0.873	3.6845e-05	Singlet	RPL34
H2AFZ	1.3228e-09	0.604767	0.441	0.822	3.94127e-05	Singlet	H2AFZ
RBM8A	1.33579e-09	1.16714	0.326	0.669	3.97998e-05	Singlet	RBM8A
COX5A	2.30944e-09	0.888301	0.385	0.755	6.88097e-05	Singlet	COX5A
SERBP1	3.32421e-09	1.11228	0.377	0.75	9.90448e-05	Singlet	SERBP1
NDUFB2	3.33106e-09	0.633887	0.42	0.78	9.92488e-05	Singlet	NDUFB2
SOD1	3.50874e-09	0.67094	0.446	0.82	0.000104543	Singlet	SOD1
ATP5PO	4.29427e-09	1.15032	0.353	0.689	0.000127948	Singlet	ATP5PO
SELENOW	5.35752e-09	0.551509	0.484	0.837	0.000159627	Singlet	SELENOW
RPL37	5.71658e-09	0.929948	0.67	0.879	0.000170326	Singlet	RPL37
RPS25	5.91245e-09	0.866734	0.664	0.873	0.000176161	Singlet	RPS25
RPS27	5.95404e-09	0.891257	0.693	0.898	0.000177401	Singlet	RPS27
RPS24	7.96079e-09	0.994309	0.677	0.882	0.000237192	Singlet	RPS24
RPL5	8.55715e-09	1.74761	0.599	0.797	0.00025496	Singlet	RPL5
CCL4	9.75196e-09	0.945052	0.346	0.613	0.00029056	Singlet	CCL4
FABP5	9.9397e-09	0.672775	0.42	0.75	0.000296153	Singlet	FABP5
NACA	1.13867e-08	0.927257	0.657	0.878	0.000339267	Singlet	NACA
NOL7	1.31243e-08	1.22376	0.35	0.705	0.000391038	Singlet	NOL7
EEF2	1.32715e-08	1.13526	0.34	0.673	0.000395423	Singlet	EEF2
FAU	1.94575e-08	0.760906	0.664	0.894	0.000579736	Singlet	FAU
RPL35	2.22981e-08	1.41864	0.63	0.869	0.000664371	Singlet	RPL35
BTG1	2.48536e-08	0.643776	0.464	0.837	0.000740512	Singlet	BTG1
ATP5MD	2.81996e-08	0.588911	0.444	0.826	0.000840206	Singlet	ATP5MD
SNRPD2	3.00247e-08	1.00865	0.385	0.735	0.000894586	Singlet	SNRPD2
VDAC1	3.03459e-08	1.03502	0.372	0.738	0.000904158	Singlet	VDAC1
PSMD8	3.47451e-08	1.02021	0.381	0.755	0.00103523	Singlet	PSMD8
YWHAE	4.05517e-08	0.671037	0.433	0.832	0.00120824	Singlet	YWHAE
RPS16	4.06921e-08	1.22796	0.647	0.863	0.00121242	Singlet	RPS16
PTMA	5.31893e-08	0.829342	0.684	0.918	0.00158478	Singlet	PTMA
NAP1L1	5.31973e-08	0.735506	0.465	0.856	0.00158501	Singlet	NAP1L1
NDUFA11	5.59446e-08	1.25897	0.337	0.652	0.00166687	Singlet	NDUFA11
CYCS	8.73779e-08	1.38849	0.296	0.577	0.00260342	Singlet	CYCS
C12orf57	9.0241e-08	1.63188	0.276	0.532	0.00268873	Singlet	C12orf57
PRELID1	1.21568e-07	1.48814	0.322	0.636	0.00362211	Singlet	PRELID1
RPL36	1.48881e-07	1.33259	0.639	0.86	0.00443591	Singlet	RPL36
YBX1	1.68572e-07	0.670905	0.704	0.918	0.00502261	Singlet	YBX1
NDUFS5	2.84494e-07	0.858225	0.405	0.758	0.00847651	Singlet	NDUFS5
CD59	3.2737e-07	1.16192	0.461	0.807	0.00975399	Singlet	CD59
RAN	3.52719e-07	1.09182	0.377	0.729	0.0105093	Singlet	RAN
SLC25A6	3.61577e-07	1.53136	0.31	0.583	0.0107732	Singlet	SLC25A6
PRDX5	3.63327e-07	0.974477	0.394	0.757	0.0108253	Singlet	PRDX5
RPLP2	3.88565e-07	0.932726	0.674	0.898	0.0115773	Singlet	RPLP2
HSPD1	5.51163e-07	1.37202	0.333	0.642	0.0164219	Singlet	HSPD1
SLC25A3	6.30613e-07	0.831253	0.42	0.776	0.0187891	Singlet	SLC25A3
BST2	6.84919e-07	0.720833	0.458	0.823	0.0204072	Singlet	BST2
CNPY2	7.43926e-07	1.59514	0.276	0.525	0.0221653	Singlet	CNPY2
COX5B	9.32478e-07	0.545223	0.481	0.843	0.0277832	Singlet	COX5B
RPL19	1.066e-06	0.876065	0.667	0.885	0.0317614	Singlet	RPL19
RPL35A	1.11943e-06	1.26149	0.619	0.856	0.0333534	Singlet	RPL35A
SERP1	2.03959e-06	0.780211	0.434	0.803	0.0607697	Singlet	SERP1
C4orf3	2.07314e-06	0.785601	0.434	0.757	0.0617691	Singlet	C4orf3
RPS13	2.25259e-06	1.35009	0.615	0.837	0.0671158	Singlet	RPS13
NDUFC2	2.36134e-06	0.840348	0.427	0.773	0.0703562	Singlet	NDUFC2
RPL27A	3.52927e-06	0.925702	0.654	0.878	0.105155	Singlet	RPL27A
RPL3	3.77949e-06	1.25039	0.614	0.863	0.11261	Singlet	RPL3
RPL22	4.03617e-06	1.37866	0.599	0.823	0.120258	Singlet	RPL22
TUBA1B	5.38189e-06	0.844351	0.443	0.816	0.160353	Singlet	TUBA1B
HSPE1	6.8007e-06	1.43556	0.354	0.671	0.202627	Singlet	HSPE1
DNAJA1	7.11053e-06	0.97337	0.427	0.8	0.211858	Singlet	DNAJA1
RPL9	8.52098e-06	1.07157	0.621	0.878	0.253883	Singlet	RPL9
NCL	8.64783e-06	0.854448	0.436	0.81	0.257662	Singlet	NCL
HSP90AA1	1.02358e-05	0.565339	0.721	0.938	0.304976	Singlet	HSP90AA1
CALM1	1.38216e-05	0.511989	0.722	0.905	0.411815	Singlet	CALM1
RPL37A	1.47673e-05	0.863639	0.654	0.885	0.439992	Singlet	RPL37A
OST4	1.5318e-05	0.620226	0.477	0.826	0.4564	Singlet	OST4
NEDD8	1.62403e-05	0.939588	0.446	0.799	0.483881	Singlet	NEDD8
RPL23	1.66682e-05	0.991447	0.638	0.878	0.496629	Singlet	RPL23
SET	3.16205e-05	1.21928	0.409	0.758	0.942132	Singlet	SET
COX6C	3.33695e-05	0.504859	0.518	0.855	0.994243	Singlet	COX6C
TOMM7	4.83934e-05	0.741382	0.461	0.786	1	Singlet	TOMM7
COX8A	4.99507e-05	0.508582	0.472	0.819	1	Singlet	COX8A
RPL4	5.70232e-05	1.24184	0.382	0.699	1	Singlet	RPL4
PTGES3	6.00203e-05	0.758785	0.449	0.819	1	Singlet	PTGES3
CCL3	6.48957e-05	1.07527	0.587	0.919	1	Singlet	CCL3
RPL29	7.4863e-05	1.22599	0.594	0.847	1	Singlet	RPL29
HNRNPA2B1	8.3704e-05	0.834687	0.488	0.876	1	Singlet	HNRNPA2B1
DAD1	0.000104748	0.849454	0.443	0.786	1	Singlet	DAD1
SEC61G	0.000106244	0.842696	0.441	0.78	1	Singlet	SEC61G
RPL21	0.000119723	1.03846	0.619	0.845	1	Singlet	RPL21
CCL7	0.00024321	0.618068	0.334	0.505	1	Singlet	CCL7
MT2A	0.000355031	2.48451	0.454	0.529	1	Singlet	MT2A
RPL14	0.000435302	1.34557	0.587	0.839	1	Singlet	RPL14
RPLP0	0.000438627	1.48588	0.583	0.823	1	Singlet	RPLP0
ACTG1	0.000472343	0.559585	0.698	0.921	1	Singlet	ACTG1
RAB5IF	0.000484108	1.19508	0.394	0.712	1	Singlet	RAB5IF
ATP5MG	0.000552443	0.569669	0.511	0.84	1	Singlet	ATP5MG
BTF3	0.000887655	1.0203	0.436	0.784	1	Singlet	BTF3
ARPC1B	0.000941751	1.78606	0.55	0.79	1	Singlet	ARPC1B
SH3BGRL3	0.00109058	0.762083	0.687	0.906	1	Singlet	SH3BGRL3
RPS26	0.00109754	0.874918	0.64	0.866	1	Singlet	RPS26
EIF4A1	0.00165411	2.62718	0.468	0.629	1	Singlet	EIF4A1
ATP6V1G1	0.00243508	0.502175	0.491	0.822	1	Singlet	ATP6V1G1
RPL23A	0.00279564	1.19689	0.573	0.817	1	Singlet	RPL23A
RPL24	0.0035964	1.1014	0.578	0.847	1	Singlet	RPL24
RPS5	0.00550044	1.88316	0.522	0.744	1	Singlet	RPS5
CALM2	0.0055187	0.540859	0.523	0.847	1	Singlet	CALM2
PGK1	0.00562144	1.00929	0.441	0.783	1	Singlet	PGK1
RPL27	0.0056519	1.19511	0.573	0.849	1	Singlet	RPL27
NDUFA13	0.0057159	2.63341	0.427	0.538	1	Singlet	NDUFA13
UBB	0.0075842	0.511828	0.533	0.847	1	Singlet	UBB
RPS9	0.00876343	0.814159	0.611	0.873	1	Singlet	RPS9
PPIA	0.0096135	0.808169	0.653	0.902	1	Singlet	PPIA
AP003086.2	1.42245e-176	5.33335	0.794	0.018	4.2382e-172	Doublet	AP003086.2
AC009690.1	3.53249e-176	5.6386	0.781	0.014	1.05251e-171	Doublet	AC009690.1
AC016831.7	9.28441e-171	3.29506	0.856	0.079	2.76629e-166	Doublet	AC016831.7
COL4A3BP	1.22606e-170	3.00018	0.898	0.14	3.65303e-166	Doublet	COL4A3BP
HIF1A-AS2	3.2652e-147	3.36449	0.761	0.055	9.72867e-143	Doublet	HIF1A-AS2
ANKUB1	9.9169e-137	1.97646	0.866	0.127	2.95474e-132	Doublet	ANKUB1
PTPRM	1.97511e-134	2.86486	0.731	0.061	5.88485e-130	Doublet	PTPRM
WDFY3	1.72043e-131	2.08404	0.832	0.141	5.12603e-127	Doublet	WDFY3
MGAT5	1.9579e-131	2.87358	0.757	0.093	5.83357e-127	Doublet	MGAT5
FHIT	1.31877e-127	2.02908	0.804	0.118	3.92927e-123	Doublet	FHIT
MITF	2.06297e-127	1.98372	0.837	0.158	6.14663e-123	Doublet	MITF
RAPGEF1	2.28147e-126	2.0933	0.896	0.233	6.79764e-122	Doublet	RAPGEF1
AC027644.4	4.33312e-126	6.01955	0.614	0.011	1.29105e-121	Doublet	AC027644.4
ETV6	2.98815e-125	1.90058	0.883	0.212	8.9032e-121	Doublet	ETV6
VPS8	4.06694e-125	1.72459	0.892	0.212	1.21174e-120	Doublet	VPS8
AC074327.1	6.11123e-124	5.36846	0.617	0.021	1.82084e-119	Doublet	AC074327.1
LINC00486	6.37761e-124	1.46489	0.832	0.118	1.90021e-119	Doublet	LINC00486
PLD1	1.84619e-123	1.91887	0.869	0.188	5.50073e-119	Doublet	PLD1
MERTK	1.89288e-123	1.98467	0.832	0.165	5.63985e-119	Doublet	MERTK
CDH23	4.35752e-123	2.29703	0.731	0.082	1.29832e-118	Doublet	CDH23
NT5C2	7.79763e-123	1.5072	0.823	0.141	2.3233e-118	Doublet	NT5C2
MYO5A	8.75644e-123	1.62734	0.862	0.185	2.60898e-118	Doublet	MYO5A
ARHGAP24	2.18951e-122	1.89252	0.875	0.195	6.52366e-118	Doublet	ARHGAP24
ARL15	4.98537e-122	1.7398	0.876	0.175	1.48539e-117	Doublet	ARL15
TPRG1	1.10396e-121	2.29603	0.813	0.13	3.28924e-117	Doublet	TPRG1
DTNB	1.37329e-121	1.83949	0.807	0.14	4.0917e-117	Doublet	DTNB
MANBA	5.15767e-121	1.91756	0.881	0.213	1.53673e-116	Doublet	MANBA
DIRC2	1.52394e-120	3.52541	0.668	0.052	4.54058e-116	Doublet	DIRC2
RAD51B	3.9294e-120	1.84831	0.796	0.12	1.17076e-115	Doublet	RAD51B
NCKAP5	4.10843e-120	1.90379	0.819	0.155	1.22411e-115	Doublet	NCKAP5
ARHGAP26	1.04626e-119	1.56307	0.835	0.162	3.11732e-115	Doublet	ARHGAP26
PEAK1	2.36484e-119	1.81882	0.79	0.131	7.04605e-115	Doublet	PEAK1
TGFBI	3.33412e-119	2.002	0.935	0.3	9.93402e-115	Doublet	TGFBI
PCSK5	4.20282e-119	2.49363	0.722	0.086	1.25223e-114	Doublet	PCSK5
FRMD4A	1.65638e-118	1.98533	0.895	0.245	4.93517e-114	Doublet	FRMD4A
LRMDA	4.33565e-118	2.01995	0.931	0.299	1.29181e-113	Doublet	LRMDA
FOXN3	1.2892e-117	1.69693	0.863	0.196	3.84118e-113	Doublet	FOXN3
TRPS1	2.09313e-117	1.75476	0.807	0.141	6.23647e-113	Doublet	TRPS1
GAB2	5.84397e-117	1.58329	0.885	0.197	1.74121e-112	Doublet	GAB2
FBXL17	1.02222e-116	1.9082	0.737	0.089	3.0457e-112	Doublet	FBXL17
FMN1	1.0732e-116	1.71995	0.896	0.241	3.19759e-112	Doublet	FMN1
FAM20A	1.23249e-116	1.71739	0.778	0.116	3.67221e-112	Doublet	FAM20A
MKL1	1.9561e-116	4.12702	0.626	0.034	5.8282e-112	Doublet	MKL1
DENND1A	3.5428e-116	1.64253	0.774	0.114	1.05558e-111	Doublet	DENND1A
SLC16A10	3.71155e-116	1.87401	0.942	0.315	1.10586e-111	Doublet	SLC16A10
ATP9B	5.28094e-116	1.57953	0.819	0.162	1.57346e-111	Doublet	ATP9B
PPM1L	5.93534e-116	2.1477	0.681	0.061	1.76844e-111	Doublet	PPM1L
PTPRJ	1.54796e-115	1.6393	0.872	0.195	4.61214e-111	Doublet	PTPRJ
GNA12	1.66205e-115	1.75131	0.81	0.155	4.95207e-111	Doublet	GNA12
GPD2	2.53278e-115	1.34683	0.869	0.195	7.54643e-111	Doublet	GPD2
VPS13B	2.96458e-115	1.08499	0.845	0.157	8.83298e-111	Doublet	VPS13B
SH3RF3	4.1255e-115	2.75676	0.686	0.069	1.22919e-110	Doublet	SH3RF3
DMXL2	1.2155e-114	1.64812	0.94	0.317	3.62159e-110	Doublet	DMXL2
CPQ	2.89337e-114	1.63962	0.919	0.262	8.6208e-110	Doublet	CPQ
SBF2	1.11471e-113	1.52054	0.899	0.247	3.32127e-109	Doublet	SBF2
ABR	1.16622e-113	1.73797	0.809	0.158	3.47475e-109	Doublet	ABR
NCOA1	2.63326e-113	1.64051	0.803	0.155	7.8458e-109	Doublet	NCOA1
FAM198B	3.83391e-113	3.06413	0.619	0.038	1.14231e-108	Doublet	FAM198B
FAM96A	9.25026e-113	1.61626	0.797	0.145	2.75611e-108	Doublet	FAM96A
TNS3	1.63313e-112	1.55624	0.902	0.267	4.86592e-108	Doublet	TNS3
ATP8B4	1.79662e-112	1.78339	0.783	0.13	5.35304e-108	Doublet	ATP8B4
FPR3	2.8729e-112	1.46333	0.859	0.186	8.55982e-108	Doublet	FPR3
GRK3	4.26056e-112	1.38409	0.763	0.126	1.26943e-107	Doublet	GRK3
FCHSD2	6.36295e-112	1.53019	0.836	0.175	1.89584e-107	Doublet	FCHSD2
DYM	9.26219e-112	1.30295	0.767	0.128	2.75967e-107	Doublet	DYM
TANC2	1.06377e-111	1.51384	0.784	0.13	3.16951e-107	Doublet	TANC2
NHSL1	1.58255e-111	1.8801	0.721	0.093	4.71521e-107	Doublet	NHSL1
KIAA1468	2.6884e-111	4.11193	0.627	0.051	8.01009e-107	Doublet	KIAA1468
LINC00278	2.80739e-111	2.30758	0.698	0.079	8.36462e-107	Doublet	LINC00278
ARL4C	3.08839e-111	1.65092	0.803	0.142	9.20187e-107	Doublet	ARL4C
CHST11	4.56884e-111	1.81432	0.909	0.285	1.36129e-106	Doublet	CHST11
SLC38A6	6.42285e-111	2.32578	0.715	0.096	1.91369e-106	Doublet	SLC38A6
VTI1A	1.05669e-110	1.4101	0.827	0.173	3.1484e-106	Doublet	VTI1A
PLXNC1	1.30077e-110	1.34523	0.837	0.188	3.87565e-106	Doublet	PLXNC1
ZSWIM6	2.18883e-110	1.47235	0.871	0.223	6.52161e-106	Doublet	ZSWIM6
GSAP	2.38308e-110	1.5897	0.839	0.185	7.10039e-106	Doublet	GSAP
ELMO1	7.78511e-110	1.75	0.755	0.126	2.31957e-105	Doublet	ELMO1
ARHGAP15	1.09913e-109	1.43873	0.839	0.175	3.27485e-105	Doublet	ARHGAP15
GNAQ	2.0594e-109	1.45749	0.905	0.258	6.13599e-105	Doublet	GNAQ
TBC1D5	2.4747e-109	1.33585	0.869	0.217	7.37336e-105	Doublet	TBC1D5
DOCK2	3.11658e-109	1.44678	0.872	0.213	9.28584e-105	Doublet	DOCK2
UTRN	3.44758e-109	1.59097	0.764	0.128	1.02721e-104	Doublet	UTRN
PIK3R5	4.15551e-109	1.6869	0.81	0.173	1.23814e-104	Doublet	PIK3R5
ITFG1	6.2678e-109	1.22435	0.833	0.179	1.86749e-104	Doublet	ITFG1
EXOC4	6.40985e-109	1.26295	0.845	0.188	1.90981e-104	Doublet	EXOC4
TMCC1	6.45986e-109	1.44177	0.81	0.165	1.92471e-104	Doublet	TMCC1
DYRK1A	1.10166e-108	1.29508	0.791	0.148	3.28239e-104	Doublet	DYRK1A
SLCO2B1	1.69502e-108	1.33967	0.878	0.223	5.05031e-104	Doublet	SLCO2B1
RBM47	3.62544e-108	1.69109	0.912	0.302	1.0802e-103	Doublet	RBM47
WDR70	3.68711e-108	1.7627	0.732	0.104	1.09858e-103	Doublet	WDR70
COP1	4.59782e-108	1.03762	0.846	0.183	1.36992e-103	Doublet	COP1
FCHO2	5.35265e-108	1.20706	0.807	0.168	1.59482e-103	Doublet	FCHO2
CLIP4	6.88707e-108	1.76384	0.702	0.087	2.052e-103	Doublet	CLIP4
RERE	9.34812e-108	1.31453	0.793	0.157	2.78527e-103	Doublet	RERE
FBXO11	1.13745e-107	1.14382	0.843	0.196	3.38904e-103	Doublet	FBXO11
ZNF609	1.60065e-107	1.36054	0.731	0.107	4.76915e-103	Doublet	ZNF609
BMP2K	2.08497e-107	1.70994	0.889	0.275	6.21217e-103	Doublet	BMP2K
WDR7	3.60102e-107	1.83039	0.709	0.099	1.07292e-102	Doublet	WDR7
TIMP2	3.89189e-107	1.41594	0.855	0.207	1.15959e-102	Doublet	TIMP2
BIRC6	4.25165e-107	1.13865	0.86	0.205	1.26678e-102	Doublet	BIRC6
C20orf194	1.04417e-106	1.41781	0.744	0.121	3.11111e-102	Doublet	C20orf194
ARHGAP6	1.43892e-106	1.3834	0.719	0.102	4.28726e-102	Doublet	ARHGAP6
EIF4G3	1.86417e-106	1.23587	0.879	0.241	5.55428e-102	Doublet	EIF4G3
PPP3CA	1.98979e-106	1.4617	0.806	0.172	5.92858e-102	Doublet	PPP3CA
THADA	2.30919e-106	1.75437	0.682	0.086	6.88023e-102	Doublet	THADA
DISC1	3.39945e-106	1.47686	0.758	0.124	1.01287e-101	Doublet	DISC1
IGF2R	8.21156e-106	1.38233	0.852	0.21	2.44663e-101	Doublet	IGF2R
TRIO	8.25599e-106	1.08281	0.829	0.171	2.45987e-101	Doublet	TRIO
DLEU2	8.53926e-106	1.16567	0.767	0.127	2.54427e-101	Doublet	DLEU2
ZNF710	1.46227e-105	2.16908	0.685	0.086	4.35684e-101	Doublet	ZNF710
ATXN1	1.91258e-105	1.2357	0.894	0.248	5.69853e-101	Doublet	ATXN1
BAZ2B	3.00085e-105	1.24749	0.859	0.2	8.94105e-101	Doublet	BAZ2B
JARID2	3.43618e-105	1.61061	0.737	0.12	1.02381e-100	Doublet	JARID2
FAM172A	6.02732e-105	1.10088	0.778	0.138	1.79584e-100	Doublet	FAM172A
SYK	7.5991e-105	1.31307	0.863	0.217	2.26415e-100	Doublet	SYK
NCOA2	1.37182e-104	1.58572	0.732	0.118	4.08733e-100	Doublet	NCOA2
GPRIN3	1.63302e-104	1.33257	0.823	0.186	4.8656e-100	Doublet	GPRIN3
LPAR1	3.14044e-104	1.5682	0.787	0.164	9.35695e-100	Doublet	LPAR1
ATG7	5.36121e-104	1.12574	0.823	0.173	1.59737e-99	Doublet	ATG7
EXOC6B	1.26099e-103	1.35376	0.722	0.109	3.75712e-99	Doublet	EXOC6B
STARD13	2.06351e-103	1.87779	0.659	0.073	6.14823e-99	Doublet	STARD13
TTC7B	2.4512e-103	2.44143	0.64	0.068	7.30336e-99	Doublet	TTC7B
SIK3	2.62581e-103	1.3246	0.824	0.181	7.82359e-99	Doublet	SIK3
ELF2	4.47496e-103	1.33758	0.767	0.148	1.33332e-98	Doublet	ELF2
TRAPPC9	6.86765e-103	1.71099	0.672	0.086	2.04622e-98	Doublet	TRAPPC9
KCNQ3	9.25558e-103	1.68613	0.715	0.106	2.7577e-98	Doublet	KCNQ3
MOB3B	1.64558e-102	1.8414	0.719	0.113	4.90301e-98	Doublet	MOB3B
ELL2	2.39693e-102	1.67343	0.945	0.355	7.14166e-98	Doublet	ELL2
DOCK4	2.63143e-102	1.81056	0.935	0.415	7.84035e-98	Doublet	DOCK4
TBXAS1	4.01851e-102	1.11051	0.786	0.159	1.19732e-97	Doublet	TBXAS1
SLC9A9	4.36357e-102	1.64515	0.819	0.185	1.30012e-97	Doublet	SLC9A9
KANSL1	5.64667e-102	1.23275	0.869	0.227	1.68243e-97	Doublet	KANSL1
SGPL1	7.12938e-102	1.27359	0.77	0.15	2.1242e-97	Doublet	SGPL1
VRK2	7.2236e-102	1.29963	0.847	0.226	2.15227e-97	Doublet	VRK2
ACER3	7.27182e-102	1.37114	0.836	0.221	2.16664e-97	Doublet	ACER3
MYO9B	8.90818e-102	1.3115	0.847	0.219	2.65419e-97	Doublet	MYO9B
DIP2B	1.09037e-101	1.49618	0.767	0.157	3.24876e-97	Doublet	DIP2B
HERC1	1.40571e-101	1.19981	0.764	0.138	4.18833e-97	Doublet	HERC1
NSMCE2	1.63751e-101	1.15484	0.868	0.234	4.87895e-97	Doublet	NSMCE2
SUMF1	1.6935e-101	1.36625	0.763	0.137	5.04578e-97	Doublet	SUMF1
SLC7A8	1.82058e-101	1.15811	0.835	0.197	5.42442e-97	Doublet	SLC7A8
PLXDC2	2.1775e-101	1.70595	0.932	0.377	6.48786e-97	Doublet	PLXDC2
MEF2A	2.60306e-101	1.12068	0.853	0.223	7.75583e-97	Doublet	MEF2A
ITGAX	3.11602e-101	1.18997	0.873	0.247	9.28419e-97	Doublet	ITGAX
RASAL2	3.47629e-101	1.10775	0.852	0.219	1.03576e-96	Doublet	RASAL2
DENND4C	3.56962e-101	1.11381	0.738	0.128	1.06357e-96	Doublet	DENND4C
NAV2	3.61527e-101	1.83776	0.622	0.058	1.07717e-96	Doublet	NAV2
SH3PXD2B	4.14272e-101	1.50948	0.78	0.165	1.23432e-96	Doublet	SH3PXD2B
EVI5	4.65856e-101	1.5447	0.758	0.15	1.38802e-96	Doublet	EVI5
SPPL3	5.98125e-101	1.27192	0.722	0.116	1.78211e-96	Doublet	SPPL3
FNDC3A	7.15206e-101	1.48184	0.922	0.296	2.13096e-96	Doublet	FNDC3A
NPL	7.59894e-101	1.49461	0.929	0.346	2.2641e-96	Doublet	NPL
TET2	9.86224e-101	1.50233	0.757	0.148	2.93846e-96	Doublet	TET2
PICALM	1.07902e-100	1.26302	0.901	0.281	3.21494e-96	Doublet	PICALM
JMJD1C	1.11767e-100	1.23079	0.899	0.274	3.33011e-96	Doublet	JMJD1C
PIAS1	1.49477e-100	1.20276	0.865	0.241	4.45366e-96	Doublet	PIAS1
SPIDR	1.66044e-100	0.851965	0.755	0.128	4.94729e-96	Doublet	SPIDR
LCP2	2.14202e-100	1.45893	0.843	0.212	6.38214e-96	Doublet	LCP2
FOXO3	3.46157e-100	1.29665	0.837	0.212	1.03138e-95	Doublet	FOXO3
ST3GAL1	4.49336e-100	1.54667	0.902	0.285	1.3388e-95	Doublet	ST3GAL1
DOCK10	5.31892e-100	1.47482	0.917	0.31	1.58477e-95	Doublet	DOCK10
ZNF438	5.9448e-100	1.9145	0.751	0.147	1.77125e-95	Doublet	ZNF438
EEPD1	6.87276e-100	1.7224	0.745	0.14	2.04774e-95	Doublet	EEPD1
AGPAT4	1.06892e-99	1.33202	0.692	0.097	3.18483e-95	Doublet	AGPAT4
SEMA4A	1.36438e-99	1.50614	0.708	0.106	4.06518e-95	Doublet	SEMA4A
COG5	1.44503e-99	1.11115	0.721	0.12	4.30547e-95	Doublet	COG5
TENT2	1.54087e-99	0.901544	0.797	0.171	4.59103e-95	Doublet	TENT2
MED13L	1.77091e-99	0.918397	0.858	0.21	5.27643e-95	Doublet	MED13L
NF1	2.54175e-99	0.921855	0.876	0.244	7.57314e-95	Doublet	NF1
WDR26	2.70738e-99	1.35142	0.742	0.135	8.06665e-95	Doublet	WDR26
FER	4.08694e-99	1.09185	0.765	0.147	1.2177e-94	Doublet	FER
ABCG1	5.53134e-99	1.33237	0.829	0.205	1.64806e-94	Doublet	ABCG1
SSH1	6.92276e-99	1.45666	0.787	0.172	2.06264e-94	Doublet	SSH1
PAN3	7.05783e-99	1.11032	0.776	0.165	2.10288e-94	Doublet	PAN3
ARHGAP25	1.17309e-98	1.3124	0.787	0.169	3.49523e-94	Doublet	ARHGAP25
SPG11	1.35368e-98	1.49733	0.742	0.138	4.03328e-94	Doublet	SPG11
ARHGAP21	2.01829e-98	1.06025	0.776	0.165	6.01348e-94	Doublet	ARHGAP21
GNA13	3.97931e-98	1.33534	0.832	0.206	1.18563e-93	Doublet	GNA13
BNC2	4.32151e-98	1.29801	0.803	0.161	1.28759e-93	Doublet	BNC2
OLFML2B	1.03147e-97	1.09792	0.773	0.164	3.07328e-93	Doublet	OLFML2B
PRKAG2	1.04033e-97	1.54361	0.796	0.195	3.09966e-93	Doublet	PRKAG2
MAP3K5	1.09728e-97	1.56481	0.737	0.133	3.26933e-93	Doublet	MAP3K5
MUC20-OT1	1.20037e-97	2.77512	0.626	0.072	3.57651e-93	Doublet	MUC20-OT1
CDKAL1	1.41354e-97	1.27454	0.719	0.123	4.21166e-93	Doublet	CDKAL1
ERC1	1.50017e-97	0.97488	0.83	0.206	4.46976e-93	Doublet	ERC1
SNX29	1.57739e-97	1.21015	0.787	0.172	4.69984e-93	Doublet	SNX29
SPIN1	2.09911e-97	1.1144	0.763	0.161	6.25429e-93	Doublet	SPIN1
WNK1	2.27959e-97	1.25313	0.883	0.269	6.79205e-93	Doublet	WNK1
ALPK1	2.42849e-97	1.46011	0.724	0.128	7.23569e-93	Doublet	ALPK1
MTMR3	3.36831e-97	1.23791	0.709	0.114	1.00359e-92	Doublet	MTMR3
SEPT9	4.17368e-97	2.79903	0.573	0.044	1.24355e-92	Doublet	SEPT9
TCF12	4.34615e-97	0.936005	0.862	0.22	1.29493e-92	Doublet	TCF12
KLHL6	5.07347e-97	1.87392	0.699	0.116	1.51164e-92	Doublet	KLHL6
PLCL2	5.91141e-97	1.73035	0.643	0.083	1.76131e-92	Doublet	PLCL2
SEPT10	7.40414e-97	1.95377	0.671	0.093	2.20606e-92	Doublet	SEPT10
NPC1	9.49222e-97	1.34839	0.894	0.267	2.82821e-92	Doublet	NPC1
TBC1D22A	9.83997e-97	1.01577	0.823	0.202	2.93182e-92	Doublet	TBC1D22A
CLASP2	1.13916e-96	1.41349	0.728	0.135	3.39414e-92	Doublet	CLASP2
GLB1	1.63069e-96	1.45807	0.763	0.161	4.85864e-92	Doublet	GLB1
SFMBT2	2.1845e-96	1.31645	0.672	0.099	6.50872e-92	Doublet	SFMBT2
FMNL2	2.25435e-96	1.59006	0.922	0.348	6.71685e-92	Doublet	FMNL2
GSK3B	2.39889e-96	1.0292	0.813	0.202	7.1475e-92	Doublet	GSK3B
PIP4K2A	4.20617e-96	1.39253	0.742	0.154	1.25323e-91	Doublet	PIP4K2A
SNX24	4.35407e-96	1.03442	0.729	0.127	1.29729e-91	Doublet	SNX24
KMT2C	4.93279e-96	1.0246	0.817	0.205	1.46972e-91	Doublet	KMT2C
ALOX5	5.59171e-96	1.09583	0.836	0.205	1.66605e-91	Doublet	ALOX5
TTC28	5.62401e-96	1.07081	0.709	0.113	1.67567e-91	Doublet	TTC28
SIPA1L1	5.77516e-96	1.60454	0.915	0.336	1.72071e-91	Doublet	SIPA1L1
DDHD1	6.7146e-96	1.38835	0.66	0.089	2.00062e-91	Doublet	DDHD1
COMMD10	8.5245e-96	1.14391	0.763	0.166	2.53987e-91	Doublet	COMMD10
STAG1	9.99338e-96	1.21246	0.855	0.23	2.97753e-91	Doublet	STAG1
HERC4	1.10159e-95	1.05465	0.847	0.228	3.28217e-91	Doublet	HERC4
FUCA1	1.17674e-95	1.69273	0.852	0.268	3.50609e-91	Doublet	FUCA1
SEPT2	1.56933e-95	1.51177	0.787	0.157	4.67583e-91	Doublet	SEPT2
LDLRAD4	1.89739e-95	1.50151	0.66	0.09	5.65328e-91	Doublet	LDLRAD4
GTDC1	2.10666e-95	1.54327	0.708	0.128	6.2768e-91	Doublet	GTDC1
ITPR2	2.18375e-95	1.32947	0.902	0.309	6.50649e-91	Doublet	ITPR2
NUMB	2.468e-95	1.1248	0.799	0.188	7.3534e-91	Doublet	NUMB
WDFY2	2.72597e-95	1.06199	0.656	0.086	8.12202e-91	Doublet	WDFY2
DMXL1	4.27491e-95	1.10922	0.776	0.168	1.27371e-90	Doublet	DMXL1
PBX3	4.66332e-95	1.57976	0.635	0.075	1.38944e-90	Doublet	PBX3
NCEH1	5.70936e-95	1.19298	0.801	0.193	1.7011e-90	Doublet	NCEH1
MAML2	1.13112e-94	1.46499	0.896	0.296	3.37018e-90	Doublet	MAML2
FNBP1	1.13839e-94	1.03347	0.754	0.152	3.39183e-90	Doublet	FNBP1
ARIH1	1.20472e-94	0.698761	0.794	0.179	3.58947e-90	Doublet	ARIH1
ARID2	1.21022e-94	1.19277	0.745	0.15	3.60587e-90	Doublet	ARID2
BMT2	2.29094e-94	1.54369	0.662	0.099	6.82586e-90	Doublet	BMT2
SLC23A2	2.30521e-94	1.48769	0.669	0.103	6.86839e-90	Doublet	SLC23A2
PCNX1	2.59765e-94	0.921047	0.833	0.206	7.7397e-90	Doublet	PCNX1
AC009690.2	2.69574e-94	2.16384	0.564	0.041	8.03195e-90	Doublet	AC009690.2
DICER1	2.76206e-94	1.35241	0.801	0.186	8.22956e-90	Doublet	DICER1
TFRC	3.06119e-94	1.58124	0.922	0.35	9.12082e-90	Doublet	TFRC
ATP2C1	3.13357e-94	1.10067	0.876	0.264	9.33648e-90	Doublet	ATP2C1
UBASH3B	3.35131e-94	1.67703	0.668	0.107	9.98522e-90	Doublet	UBASH3B
DOCK5	5.62595e-94	1.23669	0.718	0.118	1.67625e-89	Doublet	DOCK5
NR1H3	5.67641e-94	1.31541	0.767	0.158	1.69129e-89	Doublet	NR1H3
FAM168A	7.45401e-94	1.36832	0.685	0.109	2.22092e-89	Doublet	FAM168A
CUX1	8.10315e-94	1.21095	0.812	0.196	2.41433e-89	Doublet	CUX1
NCOA3	8.40024e-94	1.27411	0.754	0.158	2.50285e-89	Doublet	NCOA3
SUSD6	9.31409e-94	1.3733	0.793	0.188	2.77513e-89	Doublet	SUSD6
RBMS1	1.00579e-93	0.829087	0.843	0.221	2.99675e-89	Doublet	RBMS1
TMEM117	1.06215e-93	1.9943	0.604	0.065	3.16467e-89	Doublet	TMEM117
ATP11B	1.20341e-93	1.26542	0.699	0.124	3.58555e-89	Doublet	ATP11B
FARP1	1.22736e-93	0.993678	0.735	0.134	3.65691e-89	Doublet	FARP1
SPTLC3	2.35146e-93	1.61997	0.623	0.075	7.00618e-89	Doublet	SPTLC3
KDM2A	2.92584e-93	1.24385	0.748	0.162	8.71754e-89	Doublet	KDM2A
SSH2	3.60782e-93	0.868369	0.721	0.127	1.07495e-88	Doublet	SSH2
PLAU	4.1745e-93	1.30453	0.793	0.19	1.24379e-88	Doublet	PLAU
SMURF2	4.64618e-93	1.56293	0.685	0.123	1.38433e-88	Doublet	SMURF2
CELF2	4.6971e-93	1.3334	0.829	0.212	1.3995e-88	Doublet	CELF2
TNIK	4.8464e-93	1.14599	0.814	0.193	1.44398e-88	Doublet	TNIK
PAG1	5.14852e-93	1.5108	0.839	0.227	1.534e-88	Doublet	PAG1
NRP1	5.3544e-93	1.4341	0.914	0.324	1.59534e-88	Doublet	NRP1
RREB1	5.43627e-93	1.26594	0.727	0.147	1.61974e-88	Doublet	RREB1
BCL2	5.4703e-93	1.75836	0.646	0.087	1.62988e-88	Doublet	BCL2
FNDC3B	8.13534e-93	1.34473	0.932	0.347	2.42392e-88	Doublet	FNDC3B
KCNMA1	9.34922e-93	1.51544	0.768	0.181	2.7856e-88	Doublet	KCNMA1
ZFAND3	1.00848e-92	1.17046	0.912	0.303	3.00476e-88	Doublet	ZFAND3
ITPR1	1.70674e-92	1.5016	0.663	0.096	5.08522e-88	Doublet	ITPR1
SLC15A3	1.72861e-92	1.00406	0.797	0.188	5.1504e-88	Doublet	SLC15A3
UBE2E2	1.84148e-92	1.12264	0.889	0.274	5.48668e-88	Doublet	UBE2E2
MAN1A1	2.31933e-92	1.0124	0.76	0.165	6.91045e-88	Doublet	MAN1A1
SPIRE1	2.50724e-92	1.24322	0.633	0.083	7.47033e-88	Doublet	SPIRE1
SLC8A1	2.54911e-92	1.57613	0.914	0.327	7.59508e-88	Doublet	SLC8A1
FGD4	2.78583e-92	1.50399	0.807	0.203	8.30037e-88	Doublet	FGD4
KIF16B	2.93107e-92	1.49343	0.658	0.102	8.73311e-88	Doublet	KIF16B
MB21D2	3.21829e-92	1.43956	0.666	0.104	9.58889e-88	Doublet	MB21D2
TTC17	3.96561e-92	1.06456	0.732	0.138	1.18155e-87	Doublet	TTC17
CD84	4.07234e-92	1.05969	0.816	0.21	1.21335e-87	Doublet	CD84
SAMD4A	4.67962e-92	1.84492	0.591	0.062	1.39429e-87	Doublet	SAMD4A
ANKRD17	5.30964e-92	1.00285	0.814	0.205	1.58201e-87	Doublet	ANKRD17
MICU1	6.27057e-92	0.977104	0.849	0.233	1.86832e-87	Doublet	MICU1
ARHGEF11	6.47534e-92	1.50677	0.614	0.072	1.92933e-87	Doublet	ARHGEF11
RHOQ	6.64981e-92	1.1982	0.793	0.19	1.98131e-87	Doublet	RHOQ
PDE8A	8.826e-92	1.50374	0.688	0.124	2.62971e-87	Doublet	PDE8A
MAP4K3	9.24969e-92	1.10149	0.718	0.134	2.75595e-87	Doublet	MAP4K3
KANSL1L	9.70545e-92	1.57816	0.645	0.092	2.89174e-87	Doublet	KANSL1L
CBFA2T2	1.28373e-91	1.28249	0.617	0.075	3.82487e-87	Doublet	CBFA2T2
AKT3	1.79063e-91	1.07709	0.835	0.214	5.33519e-87	Doublet	AKT3
ELF1	1.96595e-91	1.11289	0.891	0.281	5.85755e-87	Doublet	ELF1
WAC	2.21365e-91	1.18541	0.797	0.197	6.59558e-87	Doublet	WAC
BCAS3	2.50491e-91	0.76718	0.671	0.097	7.46337e-87	Doublet	BCAS3
ARID1B	2.80547e-91	0.966908	0.83	0.22	8.35891e-87	Doublet	ARID1B
CMKLR1	5.30854e-91	1.66545	0.708	0.128	1.58168e-86	Doublet	CMKLR1
QKI	7.18758e-91	1.41972	0.934	0.395	2.14154e-86	Doublet	QKI
ULK4	7.38904e-91	1.50911	0.612	0.073	2.20157e-86	Doublet	ULK4
ARMH3	1.16586e-90	1.35351	0.669	0.109	3.47367e-86	Doublet	ARMH3
SETD2	1.21518e-90	1.26431	0.76	0.162	3.62062e-86	Doublet	SETD2
LRP1	1.38428e-90	0.803015	0.835	0.224	4.12448e-86	Doublet	LRP1
LRBA	1.66794e-90	1.32067	0.643	0.092	4.96963e-86	Doublet	LRBA
UMAD1	1.85603e-90	1.18642	0.689	0.117	5.53004e-86	Doublet	UMAD1
MTSS1	2.27371e-90	1.5055	0.708	0.134	6.77453e-86	Doublet	MTSS1
PKD2	2.95997e-90	1.07755	0.706	0.128	8.81923e-86	Doublet	PKD2
TTYH3	2.99409e-90	1.31397	0.675	0.113	8.92089e-86	Doublet	TTYH3
SPRED1	3.94626e-90	1.25122	0.824	0.223	1.17579e-85	Doublet	SPRED1
A2M	4.27368e-90	1.10682	0.866	0.261	1.27334e-85	Doublet	A2M
AMPD3	5.08714e-90	1.25339	0.814	0.217	1.51571e-85	Doublet	AMPD3
GALNT1	6.65546e-90	1.30096	0.761	0.168	1.98299e-85	Doublet	GALNT1
RAPGEF2	7.4809e-90	1.13131	0.804	0.195	2.22893e-85	Doublet	RAPGEF2
AFF1	9.24772e-90	0.854731	0.801	0.196	2.75536e-85	Doublet	AFF1
IQGAP2	9.65267e-90	1.16255	0.711	0.134	2.87601e-85	Doublet	IQGAP2
LIMK2	1.30124e-89	1.55589	0.778	0.188	3.87705e-85	Doublet	LIMK2
TRAK1	1.64477e-89	1.90758	0.578	0.066	4.90059e-85	Doublet	TRAK1
MCU	2.70361e-89	1.81114	0.601	0.073	8.05541e-85	Doublet	MCU
PAPSS2	2.76681e-89	1.36624	0.686	0.121	8.24372e-85	Doublet	PAPSS2
NFAT5	4.82174e-89	0.900309	0.799	0.195	1.43664e-84	Doublet	NFAT5
SEPT7	5.4396e-89	1.08039	0.876	0.221	1.62073e-84	Doublet	SEPT7
ARSB	6.44237e-89	1.40607	0.692	0.135	1.9195e-84	Doublet	ARSB
GBE1	6.7534e-89	1.26895	0.724	0.152	2.01218e-84	Doublet	GBE1
FRYL	7.08991e-89	1.18657	0.724	0.157	2.11244e-84	Doublet	FRYL
BACH1	8.4971e-89	1.15613	0.886	0.302	2.53171e-84	Doublet	BACH1
ZNRF2	8.6595e-89	1.46552	0.676	0.116	2.5801e-84	Doublet	ZNRF2
USP32	9.28819e-89	1.08329	0.725	0.147	2.76742e-84	Doublet	USP32
WBP1L	9.37203e-89	1.06324	0.692	0.124	2.7924e-84	Doublet	WBP1L
PARP8	1.22033e-88	1.15129	0.681	0.116	3.63598e-84	Doublet	PARP8
PRKN	1.30189e-88	1.03098	0.603	0.066	3.879e-84	Doublet	PRKN
AP3B1	1.56488e-88	0.955666	0.86	0.255	4.66255e-84	Doublet	AP3B1
RABGAP1L	1.69814e-88	1.01089	0.754	0.161	5.05959e-84	Doublet	RABGAP1L
MXD1	1.79786e-88	1.19075	0.902	0.291	5.35671e-84	Doublet	MXD1
INPP4A	2.03306e-88	1.36566	0.614	0.08	6.0575e-84	Doublet	INPP4A
DLG1	2.26036e-88	0.746117	0.718	0.137	6.73475e-84	Doublet	DLG1
SRPK2	2.26713e-88	0.668846	0.82	0.21	6.75493e-84	Doublet	SRPK2
MRC1	2.43216e-88	1.91233	0.662	0.111	7.24661e-84	Doublet	MRC1
SGPP1	2.61816e-88	1.25475	0.675	0.11	7.80079e-84	Doublet	SGPP1
ENTPD1	2.77432e-88	1.75393	0.719	0.154	8.2661e-84	Doublet	ENTPD1
CLEC7A	3.37161e-88	1.40176	0.777	0.197	1.00457e-83	Doublet	CLEC7A
BABAM2	3.63839e-88	0.989983	0.794	0.193	1.08406e-83	Doublet	BABAM2
PECAM1	6.26948e-88	1.52754	0.742	0.166	1.86799e-83	Doublet	PECAM1
RIC1	6.53742e-88	0.867049	0.675	0.114	1.94782e-83	Doublet	RIC1
TRPC4AP	6.86246e-88	1.1098	0.708	0.131	2.04467e-83	Doublet	TRPC4AP
TRAF3	1.01372e-87	1.29492	0.771	0.186	3.02037e-83	Doublet	TRAF3
GLG1	1.20815e-87	1.01105	0.796	0.197	3.5997e-83	Doublet	GLG1
ARHGAP12	1.51214e-87	0.750422	0.784	0.192	4.50541e-83	Doublet	ARHGAP12
CDK19	1.64215e-87	1.14609	0.652	0.1	4.89278e-83	Doublet	CDK19
HIPK2	1.72795e-87	1.04377	0.773	0.172	5.14842e-83	Doublet	HIPK2
DCAF6	2.03025e-87	0.718043	0.814	0.202	6.04914e-83	Doublet	DCAF6
CAB39	2.08987e-87	1.0134	0.768	0.188	6.22678e-83	Doublet	CAB39
DIAPH2	2.31578e-87	1.33311	0.852	0.25	6.89987e-83	Doublet	DIAPH2
DOCK11	2.35516e-87	1.02462	0.706	0.137	7.0172e-83	Doublet	DOCK11
PHACTR4	2.647e-87	1.23482	0.732	0.152	7.88673e-83	Doublet	PHACTR4
TET3	2.84529e-87	1.6645	0.59	0.068	8.47755e-83	Doublet	TET3
PREX1	2.86632e-87	1.29416	0.731	0.158	8.54021e-83	Doublet	PREX1
TAOK1	3.00517e-87	1.04497	0.794	0.189	8.95391e-83	Doublet	TAOK1
CYTH1	5.61908e-87	1.0448	0.776	0.189	1.6742e-82	Doublet	CYTH1
HEXB	6.36668e-87	1.10713	0.881	0.306	1.89695e-82	Doublet	HEXB
RNF38	6.61286e-87	1.59014	0.596	0.076	1.9703e-82	Doublet	RNF38
CDC27	6.67876e-87	1.39452	0.705	0.135	1.98994e-82	Doublet	CDC27
TMEM135	8.29793e-87	2.06309	0.56	0.054	2.47237e-82	Doublet	TMEM135
OSBPL1A	8.60777e-87	0.836608	0.764	0.183	2.56469e-82	Doublet	OSBPL1A
FAM102B	8.87569e-87	1.49578	0.645	0.109	2.64451e-82	Doublet	FAM102B
ZBTB20	8.95177e-87	0.648971	0.852	0.219	2.66718e-82	Doublet	ZBTB20
FRMD4B	9.10208e-87	1.07908	0.741	0.158	2.71196e-82	Doublet	FRMD4B
RASGRP3	1.04814e-86	1.8615	0.626	0.093	3.12293e-82	Doublet	RASGRP3
ABHD2	1.23564e-86	0.69919	0.698	0.133	3.68159e-82	Doublet	ABHD2
FAM49A	1.29054e-86	1.10867	0.891	0.293	3.84516e-82	Doublet	FAM49A
FKBP2	1.31893e-86	0.984439	0.79	0.171	3.92975e-82	Doublet	FKBP2
PSEN1	1.51551e-86	1.33897	0.712	0.142	4.51545e-82	Doublet	PSEN1
MBNL1	1.78556e-86	1.04193	0.908	0.329	5.32006e-82	Doublet	MBNL1
TAB2	1.81986e-86	0.782854	0.829	0.236	5.42227e-82	Doublet	TAB2
ITSN1	2.03698e-86	1.40343	0.636	0.094	6.06917e-82	Doublet	ITSN1
SOS1	2.23822e-86	0.979809	0.727	0.154	6.66877e-82	Doublet	SOS1
PSAP	2.40353e-86	1.10152	0.984	0.832	7.16131e-82	Doublet	PSAP
ANO10	2.40497e-86	1.69321	0.6	0.076	7.1656e-82	Doublet	ANO10
CMIP	2.90036e-86	1.27254	0.872	0.291	8.64161e-82	Doublet	CMIP
MACF1	3.89197e-86	0.912178	0.901	0.3	1.15961e-81	Doublet	MACF1
BTBD9	5.29751e-86	1.12113	0.622	0.083	1.57839e-81	Doublet	BTBD9
CHD9	5.36597e-86	0.73254	0.847	0.254	1.59879e-81	Doublet	CHD9
USP6NL	6.45523e-86	1.05325	0.724	0.154	1.92334e-81	Doublet	USP6NL
ATP6V1H	7.33479e-86	0.804454	0.833	0.231	2.1854e-81	Doublet	ATP6V1H
EP300	8.11475e-86	1.08096	0.725	0.151	2.41779e-81	Doublet	EP300
SOS2	8.20501e-86	0.981233	0.649	0.11	2.44468e-81	Doublet	SOS2
MAP3K2	8.25251e-86	0.985917	0.852	0.251	2.45884e-81	Doublet	MAP3K2
SOCS6	1.06505e-85	1.53346	0.724	0.157	3.17331e-81	Doublet	SOCS6
STX8	1.17043e-85	1.36768	0.74	0.169	3.48731e-81	Doublet	STX8
CTSD	1.20104e-85	1.14192	0.991	0.817	3.57849e-81	Doublet	CTSD
CYP27A1	1.2096e-85	1.25248	0.925	0.339	3.604e-81	Doublet	CYP27A1
MYO1F	1.3731e-85	1.03449	0.758	0.183	4.09115e-81	Doublet	MYO1F
ASAP1	1.58028e-85	0.90213	0.859	0.248	4.70843e-81	Doublet	ASAP1
AGO3	1.62485e-85	1.00177	0.682	0.13	4.84123e-81	Doublet	AGO3
EPAS1	1.73701e-85	0.683649	0.699	0.123	5.17543e-81	Doublet	EPAS1
FBXW11	1.76657e-85	1.45385	0.679	0.127	5.26351e-81	Doublet	FBXW11
KIAA1109	1.78806e-85	1.04329	0.729	0.151	5.32753e-81	Doublet	KIAA1109
PHACTR1	1.78958e-85	1.07437	0.765	0.179	5.33207e-81	Doublet	PHACTR1
AGFG1	1.91904e-85	1.09511	0.679	0.126	5.71777e-81	Doublet	AGFG1
WIPF1	2.08097e-85	0.773362	0.856	0.255	6.20026e-81	Doublet	WIPF1
KIAA2026	2.13735e-85	0.984924	0.711	0.145	6.36822e-81	Doublet	KIAA2026
PHIP	2.20979e-85	1.27148	0.74	0.169	6.58408e-81	Doublet	PHIP
PDE4B	2.23382e-85	1.14491	0.865	0.269	6.65566e-81	Doublet	PDE4B
RNF149	2.63297e-85	0.822435	0.885	0.298	7.84494e-81	Doublet	RNF149
AMBRA1	3.33444e-85	1.07932	0.597	0.072	9.93495e-81	Doublet	AMBRA1
CD163	3.88517e-85	1.26462	0.883	0.289	1.15759e-80	Doublet	CD163
AP2B1	3.9321e-85	1.15366	0.65	0.106	1.17157e-80	Doublet	AP2B1
PTPN9	5.16182e-85	1.4115	0.65	0.114	1.53796e-80	Doublet	PTPN9
HIVEP1	5.16769e-85	1.21332	0.764	0.175	1.53971e-80	Doublet	HIVEP1
TBCK	6.01819e-85	1.15716	0.64	0.1	1.79312e-80	Doublet	TBCK
HLA-DRB5	6.31477e-85	1.17343	0.876	0.244	1.88148e-80	Doublet	HLA-DRB5
DENND5A	6.31532e-85	1.09587	0.701	0.141	1.88165e-80	Doublet	DENND5A
ITGAV	7.47663e-85	0.775261	0.8	0.206	2.22766e-80	Doublet	ITGAV
FAM213A	8.78048e-85	1.66508	0.633	0.102	2.61614e-80	Doublet	FAM213A
AHNAK	8.97682e-85	0.809189	0.718	0.144	2.67464e-80	Doublet	AHNAK
PHKB	1.00439e-84	1.41066	0.682	0.134	2.99259e-80	Doublet	PHKB
ABHD12	1.13544e-84	0.833483	0.823	0.227	3.38305e-80	Doublet	ABHD12
AHCYL2	1.32024e-84	1.73553	0.565	0.059	3.93367e-80	Doublet	AHCYL2
WIPI1	1.44677e-84	0.800177	0.84	0.223	4.31065e-80	Doublet	WIPI1
WWOX	1.47746e-84	1.29201	0.604	0.083	4.4021e-80	Doublet	WWOX
BMPR2	1.58375e-84	0.751861	0.748	0.173	4.71878e-80	Doublet	BMPR2
VPS13D	1.67624e-84	1.1408	0.616	0.09	4.99436e-80	Doublet	VPS13D
PUM2	1.74344e-84	0.983183	0.708	0.141	5.19458e-80	Doublet	PUM2
RASGEF1B	1.8026e-84	1.20148	0.757	0.185	5.37084e-80	Doublet	RASGEF1B
MADD	1.94826e-84	1.82709	0.571	0.069	5.80483e-80	Doublet	MADD
SLC41A2	2.03245e-84	1.35565	0.653	0.114	6.05568e-80	Doublet	SLC41A2
UVRAG	2.47375e-84	0.922038	0.823	0.233	7.37053e-80	Doublet	UVRAG
CLASP1	2.83891e-84	1.09052	0.624	0.097	8.45854e-80	Doublet	CLASP1
POU2F1	3.18392e-84	0.991396	0.679	0.131	9.48649e-80	Doublet	POU2F1
UTY	3.22619e-84	1.04709	0.642	0.102	9.61243e-80	Doublet	UTY
LSS	3.35095e-84	1.27336	0.649	0.107	9.98416e-80	Doublet	LSS
SERINC5	3.48731e-84	0.770475	0.668	0.118	1.03904e-79	Doublet	SERINC5
AKAP13	3.5313e-84	1.03256	0.904	0.307	1.05215e-79	Doublet	AKAP13
CCNY	3.57545e-84	1.15767	0.613	0.085	1.06531e-79	Doublet	CCNY
ANKRD44	4.31069e-84	1.12319	0.647	0.104	1.28437e-79	Doublet	ANKRD44
ACP5	4.41123e-84	1.32516	0.806	0.213	1.31433e-79	Doublet	ACP5
USP25	4.99842e-84	1.47501	0.63	0.103	1.48928e-79	Doublet	USP25
SETD5	5.4334e-84	0.933299	0.75	0.188	1.61888e-79	Doublet	SETD5
PYGL	7.72717e-84	1.12623	0.753	0.176	2.30231e-79	Doublet	PYGL
ANKS1A	7.93303e-84	1.26768	0.596	0.078	2.36365e-79	Doublet	ANKS1A
TFEC	7.9344e-84	0.976392	0.843	0.257	2.36406e-79	Doublet	TFEC
FAM135A	9.69105e-84	1.59317	0.58	0.071	2.88745e-79	Doublet	FAM135A
ZNF407	9.84769e-84	0.868635	0.686	0.128	2.93412e-79	Doublet	ZNF407
SHOC2	1.31375e-83	0.825532	0.8	0.212	3.91433e-79	Doublet	SHOC2
INVS	1.56799e-83	0.948345	0.623	0.096	4.67182e-79	Doublet	INVS
LMBRD1	1.61834e-83	0.71697	0.784	0.203	4.82185e-79	Doublet	LMBRD1
MBD5	1.71202e-83	0.563437	0.709	0.138	5.10096e-79	Doublet	MBD5
CPEB4	1.90858e-83	0.894239	0.803	0.206	5.68661e-79	Doublet	CPEB4
CPEB2	2.89888e-83	1.14166	0.586	0.075	8.63721e-79	Doublet	CPEB2
USP34	2.96384e-83	0.697561	0.812	0.223	8.83076e-79	Doublet	USP34
ATF6	3.1259e-83	1.10558	0.796	0.217	9.31363e-79	Doublet	ATF6
RGL1	3.36839e-83	1.38396	0.685	0.13	1.00361e-78	Doublet	RGL1
LPP	3.94414e-83	1.07124	0.915	0.323	1.17516e-78	Doublet	LPP
CCDC91	4.52257e-83	0.755537	0.79	0.21	1.3475e-78	Doublet	CCDC91
FTX	4.6375e-83	0.814458	0.888	0.282	1.38174e-78	Doublet	FTX
NLK	4.72767e-83	1.26764	0.59	0.078	1.40861e-78	Doublet	NLK
TOM1	4.74947e-83	0.755955	0.79	0.197	1.4151e-78	Doublet	TOM1
C6orf106	4.93414e-83	1.69387	0.642	0.107	1.47013e-78	Doublet	C6orf106
ENTPD1-AS1	5.0328e-83	1.54546	0.609	0.085	1.49952e-78	Doublet	ENTPD1-AS1
B4GALT5	5.80885e-83	0.918574	0.721	0.158	1.73075e-78	Doublet	B4GALT5
PACS1	6.22051e-83	1.5903	0.639	0.116	1.8534e-78	Doublet	PACS1
ADAM28	6.5417e-83	0.887727	0.783	0.196	1.9491e-78	Doublet	ADAM28
SMG6	6.84605e-83	0.788955	0.643	0.106	2.03978e-78	Doublet	SMG6
SORL1	6.91959e-83	1.11405	0.742	0.166	2.06169e-78	Doublet	SORL1
BRWD1	7.3738e-83	0.725625	0.709	0.144	2.19702e-78	Doublet	BRWD1
AOAH	8.75494e-83	1.52631	0.647	0.116	2.60853e-78	Doublet	AOAH
LCORL	9.2182e-83	1.09539	0.725	0.161	2.74656e-78	Doublet	LCORL
ITSN2	9.37239e-83	0.745073	0.816	0.221	2.7925e-78	Doublet	ITSN2
COLGALT1	1.11985e-82	1.09161	0.722	0.15	3.3366e-78	Doublet	COLGALT1
MIR181A1HG	1.13331e-82	1.4891	0.531	0.048	3.37671e-78	Doublet	MIR181A1HG
PDGFC	1.49381e-82	1.49546	0.565	0.063	4.45081e-78	Doublet	PDGFC
CD4	1.64796e-82	1.02335	0.731	0.164	4.91008e-78	Doublet	CD4
TBC1D2	1.7974e-82	1.7075	0.63	0.107	5.35536e-78	Doublet	TBC1D2
KAT6A	2.09643e-82	1.20276	0.685	0.14	6.24632e-78	Doublet	KAT6A
AP1B1	2.19282e-82	1.09685	0.65	0.109	6.53351e-78	Doublet	AP1B1
PPP6R3	2.76776e-82	0.85712	0.735	0.162	8.24653e-78	Doublet	PPP6R3
DCTN4	2.7808e-82	0.87796	0.672	0.124	8.2854e-78	Doublet	DCTN4
TMEM131	3.67377e-82	0.652008	0.725	0.168	1.0946e-77	Doublet	TMEM131
SCPEP1	3.793e-82	0.956805	0.85	0.272	1.13013e-77	Doublet	SCPEP1
KIF13A	4.03917e-82	1.72621	0.577	0.075	1.20347e-77	Doublet	KIF13A
MBP	4.38812e-82	0.908346	0.837	0.243	1.30744e-77	Doublet	MBP
SIK2	4.99276e-82	0.875391	0.599	0.083	1.48759e-77	Doublet	SIK2
GMDS-DT	5.23665e-82	1.1089	0.627	0.104	1.56026e-77	Doublet	GMDS-DT
TSPAN4	5.7195e-82	1.0918	0.601	0.082	1.70412e-77	Doublet	TSPAN4
SEPT6	5.88464e-82	2.64053	0.563	0.069	1.75333e-77	Doublet	SEPT6
GIT2	5.91857e-82	1.56782	0.626	0.104	1.76344e-77	Doublet	GIT2
N4BP1	6.41614e-82	1.21971	0.753	0.186	1.91169e-77	Doublet	N4BP1
ACAP2	7.57572e-82	0.963884	0.879	0.302	2.25719e-77	Doublet	ACAP2
RB1	7.60023e-82	0.921195	0.875	0.285	2.26449e-77	Doublet	RB1
CRTC3	8.08923e-82	1.46477	0.586	0.076	2.41019e-77	Doublet	CRTC3
PHF21A	8.31843e-82	0.814768	0.668	0.126	2.47848e-77	Doublet	PHF21A
IQGAP1	8.43632e-82	0.786301	0.896	0.31	2.5136e-77	Doublet	IQGAP1
TLK1	9.50344e-82	0.681874	0.764	0.189	2.83155e-77	Doublet	TLK1
AGO4	1.14833e-81	1.20157	0.623	0.103	3.42144e-77	Doublet	AGO4
LYST	1.26107e-81	0.996933	0.738	0.173	3.75737e-77	Doublet	LYST
DHRSX	1.52057e-81	0.820778	0.65	0.117	4.53054e-77	Doublet	DHRSX
ABL1	1.55733e-81	0.904142	0.593	0.08	4.64005e-77	Doublet	ABL1
LRCH1	1.58939e-81	1.03764	0.632	0.103	4.7356e-77	Doublet	LRCH1
MAML3	1.98003e-81	1.6433	0.62	0.103	5.8995e-77	Doublet	MAML3
SERPING1	2.05042e-81	0.915246	0.767	0.181	6.10922e-77	Doublet	SERPING1
PHC2	2.24012e-81	1.00872	0.694	0.151	6.67445e-77	Doublet	PHC2
SMPDL3A	2.24308e-81	0.892022	0.688	0.133	6.68325e-77	Doublet	SMPDL3A
MGAT4A	2.64759e-81	0.790445	0.809	0.223	7.88849e-77	Doublet	MGAT4A
TMCC3	2.74606e-81	0.625603	0.731	0.169	8.18187e-77	Doublet	TMCC3
SGMS1	2.77577e-81	1.64378	0.622	0.104	8.27042e-77	Doublet	SGMS1
GNS	2.92212e-81	0.849132	0.885	0.3	8.70646e-77	Doublet	GNS
CADM1	3.72159e-81	1.07012	0.653	0.114	1.10885e-76	Doublet	CADM1
CTSL	5.08469e-81	1.0855	0.994	0.866	1.51498e-76	Doublet	CTSL
GAA	5.1027e-81	1.38017	0.663	0.121	1.52035e-76	Doublet	GAA
LARGE1	5.19585e-81	1.11798	0.537	0.052	1.5481e-76	Doublet	LARGE1
CTTNBP2NL	5.9938e-81	1.08867	0.708	0.152	1.78585e-76	Doublet	CTTNBP2NL
XPR1	6.26503e-81	1.43749	0.586	0.08	1.86666e-76	Doublet	XPR1
PCCA	6.85153e-81	1.16862	0.6	0.089	2.04141e-76	Doublet	PCCA
STEAP1B	7.47406e-81	0.871133	0.809	0.192	2.2269e-76	Doublet	STEAP1B
RC3H1	9.35433e-81	0.936551	0.673	0.135	2.78712e-76	Doublet	RC3H1
SLC17A5	9.935e-81	1.22428	0.679	0.134	2.96013e-76	Doublet	SLC17A5
APPL2	1.10741e-80	1.27734	0.649	0.117	3.29953e-76	Doublet	APPL2
LARP4B	1.33242e-80	1.10443	0.685	0.141	3.96994e-76	Doublet	LARP4B
ATF7IP	1.71928e-80	0.540865	0.765	0.19	5.1226e-76	Doublet	ATF7IP
GPCPD1	1.88824e-80	0.704517	0.761	0.197	5.62602e-76	Doublet	GPCPD1
LCOR	2.18679e-80	1.17918	0.732	0.168	6.51555e-76	Doublet	LCOR
CPEB3	2.40638e-80	2.16581	0.515	0.047	7.1698e-76	Doublet	CPEB3
MAPKAP1	2.6786e-80	0.646475	0.812	0.226	7.98089e-76	Doublet	MAPKAP1
RNF13	3.21868e-80	1.2236	0.97	0.523	9.59005e-76	Doublet	RNF13
CSF3R	3.64657e-80	1.28792	0.609	0.097	1.0865e-75	Doublet	CSF3R
WASHC4	3.65834e-80	0.756281	0.826	0.241	1.09e-75	Doublet	WASHC4
CTSB	4.02051e-80	0.98954	0.996	0.859	1.19791e-75	Doublet	CTSB
USP47	4.45277e-80	0.948739	0.747	0.175	1.3267e-75	Doublet	USP47
MED13	4.52697e-80	1.13212	0.738	0.171	1.34881e-75	Doublet	MED13
SLC8A1-AS1	5.03642e-80	2.21488	0.573	0.076	1.5006e-75	Doublet	SLC8A1-AS1
VPS53	5.14605e-80	1.17462	0.676	0.134	1.53327e-75	Doublet	VPS53
NCKAP1L	5.89732e-80	1.09373	0.753	0.192	1.75711e-75	Doublet	NCKAP1L
RASSF8	6.13378e-80	1.09085	0.62	0.102	1.82756e-75	Doublet	RASSF8
AVL9	6.15293e-80	0.872905	0.66	0.128	1.83327e-75	Doublet	AVL9
CREBL2	8.10515e-80	0.855144	0.711	0.152	2.41493e-75	Doublet	CREBL2
PLPP3	8.17763e-80	1.56054	0.593	0.086	2.43652e-75	Doublet	PLPP3
GBA	8.31094e-80	0.98532	0.696	0.145	2.47625e-75	Doublet	GBA
MON2	8.80826e-80	0.779329	0.647	0.117	2.62442e-75	Doublet	MON2
NIPBL	1.2538e-79	0.846842	0.873	0.279	3.73569e-75	Doublet	NIPBL
HELZ	1.67069e-79	0.86831	0.666	0.138	4.97783e-75	Doublet	HELZ
CD81	1.76658e-79	1.07373	0.888	0.331	5.26351e-75	Doublet	CD81
PBRM1	2.14494e-79	0.561328	0.813	0.226	6.39085e-75	Doublet	PBRM1
ITGB5	2.27632e-79	1.3692	0.593	0.086	6.78229e-75	Doublet	ITGB5
LNPEP	2.58845e-79	0.651448	0.704	0.15	7.71229e-75	Doublet	LNPEP
TBC1D9	2.64912e-79	1.11114	0.806	0.213	7.89305e-75	Doublet	TBC1D9
SLC43A2	2.90912e-79	1.19554	0.758	0.189	8.66774e-75	Doublet	SLC43A2
TSC22D2	3.79672e-79	0.693423	0.702	0.147	1.13123e-74	Doublet	TSC22D2
HECTD1	4.00662e-79	0.977724	0.765	0.196	1.19377e-74	Doublet	HECTD1
PPARD	5.39528e-79	1.02825	0.658	0.131	1.60753e-74	Doublet	PPARD
RUBCNL	5.58273e-79	1.28124	0.601	0.092	1.66338e-74	Doublet	RUBCNL
TAOK3	6.4455e-79	0.771188	0.86	0.288	1.92044e-74	Doublet	TAOK3
CD2AP	6.78103e-79	0.726612	0.801	0.228	2.02041e-74	Doublet	CD2AP
TGFBR2	6.91039e-79	0.894167	0.76	0.189	2.05895e-74	Doublet	TGFBR2
ATM	7.9864e-79	0.955853	0.717	0.166	2.37955e-74	Doublet	ATM
PLEKHA2	8.09458e-79	0.919434	0.712	0.165	2.41178e-74	Doublet	PLEKHA2
ANK2	8.38793e-79	1.4507	0.577	0.078	2.49918e-74	Doublet	ANK2
TRPM7	8.82554e-79	0.890411	0.753	0.196	2.62957e-74	Doublet	TRPM7
GPR183	9.37228e-79	0.89512	0.826	0.228	2.79247e-74	Doublet	GPR183
PLEKHM2	1.14172e-78	1.17178	0.671	0.133	3.40175e-74	Doublet	PLEKHM2
AL162414.1	1.25756e-78	1.93383	0.506	0.045	3.74691e-74	Doublet	AL162414.1
PIK3R1	1.28091e-78	0.611002	0.83	0.244	3.81648e-74	Doublet	PIK3R1
CAMK2D	1.33054e-78	0.581412	0.744	0.188	3.96435e-74	Doublet	CAMK2D
CAT	1.4326e-78	0.893763	0.62	0.103	4.26844e-74	Doublet	CAT
ATP6V1A	1.45676e-78	0.824585	0.77	0.203	4.34042e-74	Doublet	ATP6V1A
PKN2	1.65653e-78	0.688395	0.732	0.186	4.93562e-74	Doublet	PKN2
ATP6V0A1	1.94344e-78	0.787407	0.801	0.219	5.79048e-74	Doublet	ATP6V0A1
AC120193.1	1.94539e-78	1.40867	0.571	0.072	5.79629e-74	Doublet	AC120193.1
PRKCB	2.37889e-78	1.58744	0.659	0.131	7.08789e-74	Doublet	PRKCB
SLC36A1	2.56503e-78	2.22759	0.508	0.045	7.64252e-74	Doublet	SLC36A1
PRKCA	2.84324e-78	1.58438	0.571	0.083	8.47142e-74	Doublet	PRKCA
REV3L	3.26627e-78	1.01163	0.788	0.227	9.73186e-74	Doublet	REV3L
EPC1	3.4423e-78	0.860108	0.753	0.189	1.02563e-73	Doublet	EPC1
RNGTT	3.88527e-78	0.785365	0.659	0.127	1.15762e-73	Doublet	RNGTT
WDPCP	4.07415e-78	0.854766	0.529	0.052	1.21389e-73	Doublet	WDPCP
NEK7	4.08821e-78	0.958828	0.652	0.126	1.21808e-73	Doublet	NEK7
PELI1	4.24295e-78	1.4538	0.671	0.14	1.26419e-73	Doublet	PELI1
TPP1	5.39058e-78	0.919507	0.853	0.291	1.60612e-73	Doublet	TPP1
ANOS1	6.53863e-78	0.899263	0.588	0.089	1.94818e-73	Doublet	ANOS1
FAM208A	6.73962e-78	2.92519	0.54	0.069	2.00807e-73	Doublet	FAM208A
EML4	7.40198e-78	1.09716	0.908	0.351	2.20542e-73	Doublet	EML4
LINC00513	7.40957e-78	1.3288	0.532	0.056	2.20768e-73	Doublet	LINC00513
FAM13B	8.71064e-78	1.06512	0.659	0.133	2.59534e-73	Doublet	FAM13B
MCTP1	9.3831e-78	1.4659	0.609	0.099	2.79569e-73	Doublet	MCTP1
THEMIS2	1.00645e-77	0.638642	0.754	0.185	2.99872e-73	Doublet	THEMIS2
CEP350	1.04637e-77	0.651946	0.801	0.223	3.11767e-73	Doublet	CEP350
PTEN	1.04968e-77	0.781015	0.81	0.236	3.12753e-73	Doublet	PTEN
TRPM2	1.05698e-77	0.961115	0.679	0.138	3.14926e-73	Doublet	TRPM2
DOCK8	1.13589e-77	0.897862	0.886	0.316	3.38437e-73	Doublet	DOCK8
ZNF638	1.48047e-77	0.701123	0.814	0.234	4.41106e-73	Doublet	ZNF638
SIRPA	1.72528e-77	0.908804	0.902	0.331	5.14047e-73	Doublet	SIRPA
AUTS2	1.74777e-77	0.970271	0.658	0.123	5.20748e-73	Doublet	AUTS2
ATP11A	1.90242e-77	1.84792	0.6	0.097	5.66826e-73	Doublet	ATP11A
SOAT1	1.96014e-77	1.00713	0.901	0.323	5.84024e-73	Doublet	SOAT1
ANGEL1	2.19104e-77	2.03092	0.528	0.062	6.52819e-73	Doublet	ANGEL1
PMP22	2.26546e-77	0.950027	0.833	0.252	6.74993e-73	Doublet	PMP22
UBR4	2.31269e-77	0.96772	0.658	0.127	6.89067e-73	Doublet	UBR4
IQSEC1	2.38881e-77	1.36225	0.583	0.09	7.11746e-73	Doublet	IQSEC1
BMPR1A	2.59012e-77	1.36568	0.571	0.079	7.71727e-73	Doublet	BMPR1A
PIKFYVE	2.82722e-77	1.21603	0.633	0.114	8.4237e-73	Doublet	PIKFYVE
NR3C1	3.12921e-77	0.830632	0.898	0.302	9.32348e-73	Doublet	NR3C1
PFKFB3	3.31054e-77	1.10505	0.727	0.169	9.86376e-73	Doublet	PFKFB3
ZYG11B	3.43742e-77	1.00576	0.632	0.11	1.02418e-72	Doublet	ZYG11B
RAB20	3.73493e-77	0.946439	0.863	0.279	1.11282e-72	Doublet	RAB20
HDAC8	3.82678e-77	0.668866	0.698	0.148	1.14019e-72	Doublet	HDAC8
KCMF1	4.51542e-77	0.753947	0.681	0.144	1.34537e-72	Doublet	KCMF1
RABGAP1	5.05391e-77	0.541993	0.692	0.145	1.50581e-72	Doublet	RABGAP1
PDS5A	6.77475e-77	0.741911	0.734	0.181	2.01854e-72	Doublet	PDS5A
FAM120B	7.13861e-77	0.666039	0.607	0.1	2.12695e-72	Doublet	FAM120B
BTBD7	7.34718e-77	1.13343	0.669	0.145	2.18909e-72	Doublet	BTBD7
ARID4B	7.42708e-77	0.768529	0.812	0.23	2.2129e-72	Doublet	ARID4B
ANPEP	8.13219e-77	1.20213	0.588	0.087	2.42299e-72	Doublet	ANPEP
SH3KBP1	8.41406e-77	0.732135	0.866	0.282	2.50697e-72	Doublet	SH3KBP1
ZMYM4	1.04142e-76	0.713829	0.696	0.15	3.10291e-72	Doublet	ZMYM4
NFKB1	1.05121e-76	1.42379	0.711	0.172	3.13207e-72	Doublet	NFKB1
BRAF	1.13961e-76	0.780721	0.689	0.145	3.39547e-72	Doublet	BRAF
RAB3GAP2	1.23589e-76	1.13644	0.601	0.099	3.68235e-72	Doublet	RAB3GAP2
RIN3	1.25103e-76	0.771138	0.633	0.117	3.72745e-72	Doublet	RIN3
HMBOX1	1.50346e-76	1.15363	0.596	0.093	4.47955e-72	Doublet	HMBOX1
UBAP1	1.5177e-76	0.570559	0.675	0.135	4.52199e-72	Doublet	UBAP1
RNF213	1.52171e-76	0.937946	0.899	0.315	4.53392e-72	Doublet	RNF213
METTL15	1.57846e-76	1.41705	0.586	0.092	4.70302e-72	Doublet	METTL15
LAMP1	1.74168e-76	1.01847	0.917	0.402	5.18935e-72	Doublet	LAMP1
PTBP3	1.88092e-76	0.762484	0.842	0.265	5.6042e-72	Doublet	PTBP3
RAPH1	2.05879e-76	1.14569	0.61	0.104	6.13418e-72	Doublet	RAPH1
CDK13	2.21144e-76	0.608391	0.702	0.164	6.58899e-72	Doublet	CDK13
DCAF5	2.61513e-76	0.82436	0.632	0.117	7.79179e-72	Doublet	DCAF5
FBXL20	3.01779e-76	0.835492	0.596	0.094	8.99149e-72	Doublet	FBXL20
FRS2	3.10251e-76	1.07671	0.576	0.085	9.24393e-72	Doublet	FRS2
ST3GAL6	3.29052e-76	1.84368	0.619	0.109	9.80411e-72	Doublet	ST3GAL6
ANKRD10	3.448e-76	0.63778	0.727	0.178	1.02733e-71	Doublet	ANKRD10
TNKS	3.46686e-76	0.679424	0.65	0.128	1.03295e-71	Doublet	TNKS
NPEPPS	3.80128e-76	0.6522	0.717	0.171	1.13259e-71	Doublet	NPEPPS
CDYL	4.48012e-76	1.15629	0.596	0.097	1.33485e-71	Doublet	CDYL
GK	4.48519e-76	1.21007	0.886	0.331	1.33636e-71	Doublet	GK
AFF4	4.60145e-76	0.619945	0.797	0.227	1.371e-71	Doublet	AFF4
RICTOR	4.69805e-76	0.82699	0.691	0.157	1.39978e-71	Doublet	RICTOR
NBAS	4.78568e-76	1.0224	0.597	0.093	1.42589e-71	Doublet	NBAS
MAP3K8	4.80548e-76	1.47274	0.663	0.133	1.43179e-71	Doublet	MAP3K8
MEGF9	4.82195e-76	0.851838	0.61	0.097	1.4367e-71	Doublet	MEGF9
FNIP2	5.13876e-76	1.22221	0.904	0.327	1.53109e-71	Doublet	FNIP2
PCNX2	5.35973e-76	1.06845	0.606	0.102	1.59693e-71	Doublet	PCNX2
ASH1L	5.6699e-76	0.633392	0.85	0.272	1.68935e-71	Doublet	ASH1L
ZBTB1	7.81053e-76	0.831679	0.692	0.158	2.32715e-71	Doublet	ZBTB1
LRCH3	7.92549e-76	0.96971	0.645	0.123	2.3614e-71	Doublet	LRCH3
KDM4C	8.83403e-76	1.23592	0.593	0.096	2.6321e-71	Doublet	KDM4C
GUSB	9.68537e-76	0.962836	0.757	0.2	2.88576e-71	Doublet	GUSB
YTHDF3	9.69436e-76	0.888389	0.673	0.14	2.88844e-71	Doublet	YTHDF3
GPATCH2L	9.91054e-76	1.17612	0.701	0.164	2.95285e-71	Doublet	GPATCH2L
C9orf72	1.0445e-75	0.767554	0.839	0.248	3.1121e-71	Doublet	C9orf72
MLLT10	1.51297e-75	0.667379	0.653	0.131	4.50788e-71	Doublet	MLLT10
ZMYND11	1.56112e-75	0.769892	0.619	0.109	4.65135e-71	Doublet	ZMYND11
NFIL3	1.62849e-75	0.838165	0.63	0.118	4.85208e-71	Doublet	NFIL3
ALDH1A2	2.1921e-75	1.91865	0.571	0.089	6.53137e-71	Doublet	ALDH1A2
PPP6R2	3.01238e-75	0.631074	0.584	0.09	8.97538e-71	Doublet	PPP6R2
ARHGAP22	3.0211e-75	1.46531	0.639	0.131	9.00137e-71	Doublet	ARHGAP22
MMP14	3.10676e-75	0.964279	0.899	0.312	9.25658e-71	Doublet	MMP14
UBR1	3.17688e-75	0.737693	0.606	0.103	9.46552e-71	Doublet	UBR1
PIBF1	3.82694e-75	0.899422	0.612	0.103	1.14024e-70	Doublet	PIBF1
MFSD11	4.75116e-75	0.749686	0.652	0.131	1.41561e-70	Doublet	MFSD11
LILRB1	4.93759e-75	0.725738	0.814	0.236	1.47116e-70	Doublet	LILRB1
HSD17B12	5.13163e-75	0.698334	0.78	0.217	1.52897e-70	Doublet	HSD17B12
MAST2	5.6379e-75	1.17001	0.538	0.068	1.67981e-70	Doublet	MAST2
KIF1B	5.83611e-75	0.507785	0.669	0.138	1.73887e-70	Doublet	KIF1B
RANBP9	5.97798e-75	0.831424	0.617	0.109	1.78114e-70	Doublet	RANBP9
PPFIA1	8.07914e-75	0.950032	0.777	0.21	2.40718e-70	Doublet	PPFIA1
PLBD2	1.0639e-74	1.09143	0.646	0.133	3.16988e-70	Doublet	PLBD2
UBL3	1.14861e-74	0.713867	0.8	0.228	3.4223e-70	Doublet	UBL3
ST8SIA4	1.16257e-74	1.35838	0.586	0.093	3.46387e-70	Doublet	ST8SIA4
SMURF1	1.16423e-74	0.928696	0.614	0.113	3.46881e-70	Doublet	SMURF1
VOPP1	1.41272e-74	0.510289	0.8	0.23	4.2092e-70	Doublet	VOPP1
SETX	1.43588e-74	0.766621	0.768	0.202	4.2782e-70	Doublet	SETX
DOK3	1.47776e-74	1.17755	0.616	0.107	4.40298e-70	Doublet	DOK3
JAK2	1.8037e-74	0.857356	0.642	0.124	5.37414e-70	Doublet	JAK2
PHC3	1.95792e-74	0.929487	0.606	0.107	5.83362e-70	Doublet	PHC3
ABI1	1.98833e-74	0.503246	0.853	0.285	5.92422e-70	Doublet	ABI1
SDK1	2.26487e-74	1.8781	0.506	0.051	6.74818e-70	Doublet	SDK1
DOCK3	2.36034e-74	1.19347	0.537	0.068	7.03265e-70	Doublet	DOCK3
R3HCC1L	2.65358e-74	0.76825	0.652	0.126	7.90634e-70	Doublet	R3HCC1L
SLC6A6	2.93279e-74	0.918009	0.741	0.181	8.73824e-70	Doublet	SLC6A6
PLXND1	3.1441e-74	1.50536	0.56	0.08	9.36784e-70	Doublet	PLXND1
DAPK1	3.45705e-74	1.88174	0.518	0.059	1.03003e-69	Doublet	DAPK1
ADAM8	5.53404e-74	1.97955	0.607	0.12	1.64887e-69	Doublet	ADAM8
CAMSAP2	6.97547e-74	0.85045	0.669	0.148	2.07834e-69	Doublet	CAMSAP2
SDC2	7.31664e-74	1.01734	0.886	0.316	2.17999e-69	Doublet	SDC2
PPP1R12A	8.02453e-74	0.665852	0.859	0.271	2.39091e-69	Doublet	PPP1R12A
ZCCHC2	8.05383e-74	1.30063	0.659	0.137	2.39964e-69	Doublet	ZCCHC2
AAK1	8.25576e-74	0.863888	0.786	0.223	2.4598e-69	Doublet	AAK1
SNX13	9.1001e-74	0.832248	0.729	0.185	2.71138e-69	Doublet	SNX13
TAF3	9.52627e-74	1.24266	0.61	0.109	2.83835e-69	Doublet	TAF3
ADD1	9.64059e-74	0.592316	0.705	0.164	2.87242e-69	Doublet	ADD1
LGMN	1.05164e-73	1.0647	0.908	0.374	3.13337e-69	Doublet	LGMN
KLHL5	1.0705e-73	0.789386	0.777	0.214	3.18955e-69	Doublet	KLHL5
CBL	1.36505e-73	1.06039	0.735	0.189	4.06718e-69	Doublet	CBL
PDE4A	1.39449e-73	1.04602	0.635	0.124	4.15487e-69	Doublet	PDE4A
SDCCAG8	1.4071e-73	0.86148	0.881	0.319	4.19244e-69	Doublet	SDCCAG8
OSBPL3	1.46017e-73	1.35566	0.565	0.083	4.35059e-69	Doublet	OSBPL3
CAPN7	1.5644e-73	0.632633	0.646	0.13	4.66114e-69	Doublet	CAPN7
ADPGK	1.63461e-73	0.853281	0.82	0.24	4.87032e-69	Doublet	ADPGK
RASA2	2.02643e-73	0.780585	0.669	0.148	6.03776e-69	Doublet	RASA2
DOCK7	2.19327e-73	1.15754	0.659	0.145	6.53486e-69	Doublet	DOCK7
CELF1	2.22302e-73	0.841543	0.741	0.186	6.62348e-69	Doublet	CELF1
TBC1D12	2.31727e-73	1.10694	0.583	0.096	6.90432e-69	Doublet	TBC1D12
PIK3CB	2.32163e-73	0.965223	0.616	0.113	6.91729e-69	Doublet	PIK3CB
BCL2L1	2.52798e-73	0.963591	0.662	0.141	7.53213e-69	Doublet	BCL2L1
SHTN1	3.7295e-73	0.697226	0.819	0.255	1.1112e-68	Doublet	SHTN1
TTBK2	3.84965e-73	1.28839	0.524	0.063	1.147e-68	Doublet	TTBK2
MYCBP2	3.8985e-73	0.709743	0.82	0.251	1.16156e-68	Doublet	MYCBP2
GNPTAB	4.15124e-73	1.04114	0.706	0.165	1.23686e-68	Doublet	GNPTAB
EPB41L3	4.26888e-73	1.15328	0.948	0.471	1.27191e-68	Doublet	EPB41L3
CTNNBL1	4.77327e-73	1.03577	0.773	0.212	1.4222e-68	Doublet	CTNNBL1
SEC24B	5.11642e-73	1.43346	0.571	0.092	1.52444e-68	Doublet	SEC24B
ZEB2	5.83542e-73	1.25492	0.941	0.446	1.73866e-68	Doublet	ZEB2
CPM	8.1079e-73	0.789969	0.856	0.274	2.41575e-68	Doublet	CPM
SCCPDH	9.19034e-73	0.796392	0.715	0.172	2.73826e-68	Doublet	SCCPDH
MAPK14	1.0677e-72	0.703198	0.649	0.138	3.1812e-68	Doublet	MAPK14
EDEM2	1.08785e-72	0.624929	0.737	0.193	3.24124e-68	Doublet	EDEM2
POR	1.21848e-72	1.04063	0.635	0.126	3.63047e-68	Doublet	POR
CBLB	1.31025e-72	0.821533	0.521	0.062	3.90389e-68	Doublet	CBLB
SLC11A1	1.38656e-72	1.15288	0.928	0.379	4.13124e-68	Doublet	SLC11A1
WWP2	1.47137e-72	1.15138	0.565	0.089	4.38396e-68	Doublet	WWP2
NSD1	1.48991e-72	0.538617	0.744	0.188	4.43918e-68	Doublet	NSD1
LHFPL2	1.66542e-72	0.793668	0.863	0.285	4.96211e-68	Doublet	LHFPL2
BPTF	1.69534e-72	0.637488	0.754	0.197	5.05126e-68	Doublet	BPTF
NCOA4	1.6974e-72	0.782765	0.797	0.25	5.05739e-68	Doublet	NCOA4
ACP2	1.87419e-72	0.635563	0.839	0.264	5.58414e-68	Doublet	ACP2
ZFP36L2	1.95912e-72	0.806815	0.714	0.182	5.83719e-68	Doublet	ZFP36L2
COLEC12	2.06525e-72	1.62858	0.548	0.075	6.1534e-68	Doublet	COLEC12
GPNMB	2.11815e-72	1.09915	0.965	0.585	6.31104e-68	Doublet	GPNMB
CUL3	2.5896e-72	0.836067	0.668	0.157	7.71572e-68	Doublet	CUL3
SLC38A9	2.64627e-72	1.44604	0.519	0.066	7.88458e-68	Doublet	SLC38A9
LRRK1	2.76816e-72	1.36897	0.544	0.08	8.24775e-68	Doublet	LRRK1
CARMIL1	3.04043e-72	0.558415	0.587	0.096	9.05897e-68	Doublet	CARMIL1
ADAM17	3.49205e-72	0.599711	0.803	0.237	1.04046e-67	Doublet	ADAM17
CCDC88A	3.50215e-72	0.791869	0.875	0.292	1.04347e-67	Doublet	CCDC88A
UBR2	3.55374e-72	0.908296	0.665	0.145	1.05884e-67	Doublet	UBR2
GNB4	3.58957e-72	0.922904	0.859	0.307	1.06951e-67	Doublet	GNB4
REL	3.63084e-72	0.994724	0.76	0.206	1.08181e-67	Doublet	REL
CDK17	4.20391e-72	0.778913	0.593	0.106	1.25255e-67	Doublet	CDK17
RUNX1	5.01487e-72	0.863603	0.869	0.288	1.49418e-67	Doublet	RUNX1
ANKIB1	5.53079e-72	0.648378	0.708	0.171	1.6479e-67	Doublet	ANKIB1
SCAPER	5.67296e-72	0.702212	0.612	0.118	1.69026e-67	Doublet	SCAPER
RAB3GAP1	8.66227e-72	0.594878	0.688	0.159	2.58092e-67	Doublet	RAB3GAP1
TMEM65	9.07191e-72	0.967658	0.525	0.069	2.70298e-67	Doublet	TMEM65
MAP2K4	9.13551e-72	1.1005	0.609	0.113	2.72193e-67	Doublet	MAP2K4
SLC1A3	9.2685e-72	1.18218	0.734	0.196	2.76155e-67	Doublet	SLC1A3
USP15	9.88211e-72	0.636233	0.872	0.288	2.94437e-67	Doublet	USP15
VPS13C	1.60427e-71	0.63507	0.847	0.274	4.77992e-67	Doublet	VPS13C
NPTN	1.93545e-71	0.722796	0.796	0.231	5.76669e-67	Doublet	NPTN
BTRC	1.9834e-71	0.58568	0.576	0.092	5.90955e-67	Doublet	BTRC
HIPK3	2.01634e-71	0.618292	0.724	0.179	6.00767e-67	Doublet	HIPK3
LTA4H	2.05641e-71	0.825457	0.663	0.147	6.12707e-67	Doublet	LTA4H
RFTN1	2.19879e-71	0.970237	0.532	0.072	6.55128e-67	Doublet	RFTN1
KIFC3	2.20826e-71	0.969253	0.698	0.162	6.57952e-67	Doublet	KIFC3
FOLR2	2.38228e-71	1.14038	0.55	0.076	7.09799e-67	Doublet	FOLR2
ABHD3	2.67757e-71	1.00978	0.633	0.13	7.97783e-67	Doublet	ABHD3
UBA6	2.963e-71	0.971916	0.75	0.2	8.82826e-67	Doublet	UBA6
CACUL1	4.03782e-71	0.943857	0.718	0.181	1.20307e-66	Doublet	CACUL1
ADAM9	4.34401e-71	0.890279	0.879	0.31	1.2943e-66	Doublet	ADAM9
AC025580.2	6.18199e-71	0.973985	0.696	0.166	1.84192e-66	Doublet	AC025580.2
CHD6	6.52344e-71	0.891011	0.578	0.099	1.94366e-66	Doublet	CHD6
MEF2C	7.00495e-71	0.80699	0.656	0.145	2.08712e-66	Doublet	MEF2C
ANO6	9.86612e-71	0.860823	0.735	0.199	2.93961e-66	Doublet	ANO6
SLC39A11	1.04767e-70	1.4508	0.525	0.072	3.12153e-66	Doublet	SLC39A11
CDC42SE2	1.32064e-70	0.604763	0.82	0.258	3.93483e-66	Doublet	CDC42SE2
GALC	1.67449e-70	0.725555	0.606	0.113	4.98914e-66	Doublet	GALC
ATAD2B	1.67568e-70	1.44945	0.55	0.087	4.9927e-66	Doublet	ATAD2B
C5AR1	1.74401e-70	1.00563	0.914	0.372	5.19628e-66	Doublet	C5AR1
TRIM33	2.02378e-70	1.22606	0.685	0.171	6.02986e-66	Doublet	TRIM33
HOOK3	2.06161e-70	0.697683	0.763	0.213	6.14257e-66	Doublet	HOOK3
ADK	2.18574e-70	0.759158	0.696	0.169	6.51241e-66	Doublet	ADK
MAP3K1	2.48946e-70	0.842952	0.606	0.113	7.41734e-66	Doublet	MAP3K1
MAP4K4	2.69465e-70	0.820382	0.694	0.171	8.02872e-66	Doublet	MAP4K4
SLMAP	3.39347e-70	0.709298	0.626	0.124	1.01109e-65	Doublet	SLMAP
DLEU7	3.66514e-70	1.34663	0.731	0.197	1.09203e-65	Doublet	DLEU7
AGPS	3.72361e-70	0.629374	0.678	0.162	1.10945e-65	Doublet	AGPS
SLC4A7	3.72852e-70	0.709107	0.738	0.205	1.11091e-65	Doublet	SLC4A7
PIK3CA	3.93108e-70	1.30936	0.603	0.117	1.17126e-65	Doublet	PIK3CA
CEP170	3.9696e-70	0.888538	0.919	0.362	1.18274e-65	Doublet	CEP170
FOSL2	4.20095e-70	0.570026	0.787	0.233	1.25167e-65	Doublet	FOSL2
ZNF652	4.24015e-70	0.729451	0.617	0.121	1.26335e-65	Doublet	ZNF652
UBAC2	4.3683e-70	0.687735	0.777	0.228	1.30153e-65	Doublet	UBAC2
ASXL2	4.45889e-70	0.556547	0.696	0.171	1.32853e-65	Doublet	ASXL2
CHM	4.49523e-70	0.595749	0.692	0.168	1.33935e-65	Doublet	CHM
ZNF267	5.47988e-70	0.714256	0.796	0.238	1.63273e-65	Doublet	ZNF267
PRKCH	5.51461e-70	1.07972	0.668	0.154	1.64308e-65	Doublet	PRKCH
HTT	6.22861e-70	1.93514	0.565	0.099	1.85582e-65	Doublet	HTT
TLR1	6.56748e-70	1.03014	0.709	0.183	1.95678e-65	Doublet	TLR1
POGZ	7.8939e-70	0.658982	0.604	0.114	2.35199e-65	Doublet	POGZ
TMEM51	8.42821e-70	1.28996	0.55	0.083	2.51119e-65	Doublet	TMEM51
TDP2	9.76971e-70	0.749887	0.836	0.271	2.91089e-65	Doublet	TDP2
PIK3AP1	1.05796e-69	0.975285	0.902	0.324	3.1522e-65	Doublet	PIK3AP1
MARCH6	1.06907e-69	0.624513	0.691	0.171	3.18528e-65	Doublet	MARCH6
CPED1	1.18102e-69	1.36601	0.534	0.078	3.51885e-65	Doublet	CPED1
PDLIM5	1.2091e-69	1.32368	0.613	0.127	3.60251e-65	Doublet	PDLIM5
MAP2K1	1.32383e-69	0.513341	0.646	0.135	3.94436e-65	Doublet	MAP2K1
KYNU	1.39474e-69	1.06273	0.937	0.436	4.15564e-65	Doublet	KYNU
ATXN2	1.77903e-69	0.753864	0.686	0.165	5.30062e-65	Doublet	ATXN2
AMZ1	1.81507e-69	1.45663	0.509	0.066	5.408e-65	Doublet	AMZ1
NCOA6	1.89755e-69	1.17063	0.557	0.09	5.65376e-65	Doublet	NCOA6
TRAPPC8	2.07317e-69	1.10553	0.619	0.133	6.177e-65	Doublet	TRAPPC8
LYN	2.12635e-69	1.14054	0.951	0.441	6.33545e-65	Doublet	LYN
LILRB3	2.12763e-69	0.951042	0.715	0.179	6.33928e-65	Doublet	LILRB3
ZFHX3	2.18277e-69	0.714641	0.742	0.196	6.50355e-65	Doublet	ZFHX3
GPATCH8	2.20873e-69	0.600982	0.731	0.192	6.58092e-65	Doublet	GPATCH8
TNFAIP2	2.60248e-69	0.634973	0.706	0.175	7.75408e-65	Doublet	TNFAIP2
ETNK1	2.92564e-69	0.849408	0.709	0.192	8.71696e-65	Doublet	ETNK1
MALT1	3.34131e-69	0.784227	0.673	0.169	9.95542e-65	Doublet	MALT1
SLC11A2	3.41509e-69	0.673169	0.793	0.233	1.01753e-64	Doublet	SLC11A2
PPP3CC	4.03183e-69	1.06764	0.619	0.124	1.20128e-64	Doublet	PPP3CC
IL18	4.63303e-69	0.821074	0.855	0.299	1.38041e-64	Doublet	IL18
RABEP1	4.637e-69	0.819359	0.732	0.189	1.38159e-64	Doublet	RABEP1
DCAF7	4.96785e-69	0.55985	0.623	0.126	1.48017e-64	Doublet	DCAF7
AFTPH	5.31006e-69	1.09295	0.691	0.172	1.58213e-64	Doublet	AFTPH
USP9X	6.38338e-69	0.5042	0.729	0.199	1.90193e-64	Doublet	USP9X
LRP12	6.47647e-69	0.971019	0.623	0.127	1.92966e-64	Doublet	LRP12
SNX18	6.72613e-69	0.753339	0.675	0.155	2.00405e-64	Doublet	SNX18
NABP1	6.83789e-69	0.573834	0.876	0.313	2.03735e-64	Doublet	NABP1
NR4A3	7.23887e-69	1.54266	0.506	0.065	2.15682e-64	Doublet	NR4A3
EPB41	7.56443e-69	1.187	0.564	0.097	2.25382e-64	Doublet	EPB41
PLEC	7.78021e-69	1.08046	0.597	0.111	2.31811e-64	Doublet	PLEC
RPRD2	8.57827e-69	1.11833	0.584	0.106	2.55589e-64	Doublet	RPRD2
ZNF644	8.99108e-69	0.618159	0.724	0.199	2.67889e-64	Doublet	ZNF644
EMILIN2	1.07687e-68	0.813807	0.645	0.14	3.20855e-64	Doublet	EMILIN2
GALM	1.39123e-68	1.45232	0.508	0.068	4.14516e-64	Doublet	GALM
KIAA0930	1.43411e-68	1.48653	0.597	0.114	4.27292e-64	Doublet	KIAA0930
TREM2	1.47823e-68	0.903096	0.698	0.175	4.40438e-64	Doublet	TREM2
SMAD2	1.66978e-68	0.546451	0.727	0.19	4.97511e-64	Doublet	SMAD2
UGCG	1.70894e-68	0.856086	0.914	0.341	5.0918e-64	Doublet	UGCG
CMTM7	1.7264e-68	0.899091	0.617	0.126	5.14382e-64	Doublet	CMTM7
TULP4	1.80348e-68	0.702244	0.669	0.157	5.37348e-64	Doublet	TULP4
MPEG1	1.89018e-68	1.57486	0.522	0.073	5.63179e-64	Doublet	MPEG1
UBE4B	2.29618e-68	0.69905	0.553	0.089	6.84146e-64	Doublet	UBE4B
MACC1	2.65979e-68	1.23711	0.581	0.103	7.92485e-64	Doublet	MACC1
GALNT2	2.86382e-68	0.953032	0.653	0.144	8.53274e-64	Doublet	GALNT2
FGGY	2.89092e-68	1.4416	0.54	0.083	8.61351e-64	Doublet	FGGY
MECP2	3.04642e-68	0.772322	0.655	0.151	9.07681e-64	Doublet	MECP2
STIM1	3.35563e-68	1.38426	0.531	0.08	9.9981e-64	Doublet	STIM1
PDS5B	3.61324e-68	0.644005	0.637	0.138	1.07657e-63	Doublet	PDS5B
STK10	3.83582e-68	1.10154	0.635	0.144	1.14288e-63	Doublet	STK10
KMT2E	3.93245e-68	0.552783	0.845	0.265	1.17167e-63	Doublet	KMT2E
MAP3K4	4.04358e-68	0.67206	0.672	0.161	1.20478e-63	Doublet	MAP3K4
SWAP70	4.18979e-68	0.547595	0.836	0.271	1.24835e-63	Doublet	SWAP70
USP24	4.29348e-68	0.822775	0.529	0.076	1.27924e-63	Doublet	USP24
IL6R	4.32362e-68	0.862656	0.64	0.14	1.28822e-63	Doublet	IL6R
SLC25A13	4.5313e-68	1.36797	0.617	0.13	1.3501e-63	Doublet	SLC25A13
CD300E	4.5455e-68	0.815418	0.758	0.217	1.35433e-63	Doublet	CD300E
NEK1	4.92783e-68	1.05169	0.512	0.068	1.46825e-63	Doublet	NEK1
PTPRA	4.99678e-68	0.684921	0.619	0.133	1.48879e-63	Doublet	PTPRA
PPP2R5E	5.93348e-68	0.540526	0.656	0.151	1.76788e-63	Doublet	PPP2R5E
DIP2A	6.30389e-68	1.64384	0.54	0.09	1.87824e-63	Doublet	DIP2A
AES	6.51889e-68	1.51422	0.531	0.082	1.9423e-63	Doublet	AES
ARHGAP31	6.90749e-68	1.12701	0.531	0.082	2.05809e-63	Doublet	ARHGAP31
UHRF1BP1L	7.17187e-68	0.973308	0.671	0.162	2.13686e-63	Doublet	UHRF1BP1L
SKAP2	7.78802e-68	0.618191	0.817	0.271	2.32044e-63	Doublet	SKAP2
ATG4C	9.73558e-68	0.550218	0.573	0.1	2.90072e-63	Doublet	ATG4C
PLTP	1.12316e-67	0.711538	0.773	0.227	3.34646e-63	Doublet	PLTP
SLC7A11	1.34438e-67	1.69113	0.571	0.106	4.00558e-63	Doublet	SLC7A11
FAM107B	1.37679e-67	1.13294	0.665	0.158	4.10214e-63	Doublet	FAM107B
ECPAS	1.59336e-67	0.872728	0.588	0.113	4.74743e-63	Doublet	ECPAS
XRN1	1.68633e-67	0.692373	0.714	0.188	5.02443e-63	Doublet	XRN1
INPP5D	1.74247e-67	1.67354	0.504	0.066	5.19168e-63	Doublet	INPP5D
MMD	1.78332e-67	0.799737	0.65	0.151	5.31339e-63	Doublet	MMD
DCUN1D1	1.98962e-67	0.615197	0.709	0.182	5.92808e-63	Doublet	DCUN1D1
WDFY4	2.18608e-67	0.667404	0.614	0.124	6.51341e-63	Doublet	WDFY4
LPAR6	2.22704e-67	0.729108	0.612	0.127	6.63547e-63	Doublet	LPAR6
ROCK2	2.84794e-67	0.728867	0.692	0.169	8.48543e-63	Doublet	ROCK2
PPARG	3.21312e-67	1.01399	0.719	0.197	9.57348e-63	Doublet	PPARG
PDCD6IP	3.86277e-67	0.815339	0.886	0.337	1.15091e-62	Doublet	PDCD6IP
RHOT1	4.39162e-67	0.80384	0.576	0.106	1.30848e-62	Doublet	RHOT1
SRGAP2	5.23347e-67	0.873148	0.627	0.14	1.55931e-62	Doublet	SRGAP2
GNPTG	5.56859e-67	0.550827	0.737	0.202	1.65916e-62	Doublet	GNPTG
GPBP1L1	5.8648e-67	0.903532	0.647	0.147	1.74742e-62	Doublet	GPBP1L1
CREBBP	6.02253e-67	0.52678	0.633	0.14	1.79441e-62	Doublet	CREBBP
ITGB7	6.2451e-67	0.609668	0.623	0.127	1.86073e-62	Doublet	ITGB7
RASSF4	7.93652e-67	0.80281	0.666	0.157	2.36469e-62	Doublet	RASSF4
SGK3	8.92404e-67	0.51802	0.734	0.207	2.65892e-62	Doublet	SGK3
SLAMF8	9.64488e-67	0.609876	0.718	0.182	2.87369e-62	Doublet	SLAMF8
CCSER2	1.15635e-66	0.552351	0.715	0.189	3.44536e-62	Doublet	CCSER2
ARNT	1.19783e-66	0.948497	0.532	0.083	3.56894e-62	Doublet	ARNT
EFR3A	1.32011e-66	0.509154	0.728	0.197	3.93326e-62	Doublet	EFR3A
HSD17B4	2.08064e-66	0.523892	0.74	0.21	6.19927e-62	Doublet	HSD17B4
ZFP36	2.12991e-66	0.67254	0.709	0.192	6.34606e-62	Doublet	ZFP36
CASC4	2.16612e-66	0.508684	0.78	0.247	6.45394e-62	Doublet	CASC4
CORO1C	2.38062e-66	0.876072	0.878	0.313	7.09307e-62	Doublet	CORO1C
IPMK	2.76935e-66	1.55485	0.567	0.11	8.25129e-62	Doublet	IPMK
IRAK3	2.84019e-66	0.683388	0.774	0.234	8.46234e-62	Doublet	IRAK3
RCBTB2	2.8934e-66	1.2382	0.512	0.073	8.62088e-62	Doublet	RCBTB2
ZNF516	3.04572e-66	1.3792	0.501	0.069	9.07472e-62	Doublet	ZNF516
PSPC1	3.27017e-66	0.664053	0.568	0.103	9.74346e-62	Doublet	PSPC1
P2RX4	3.33361e-66	0.868167	0.85	0.276	9.93251e-62	Doublet	P2RX4
XRCC4	3.6618e-66	0.817337	0.627	0.138	1.09103e-61	Doublet	XRCC4
AKAP10	3.69774e-66	1.14217	0.534	0.086	1.10174e-61	Doublet	AKAP10
DNAJC5	3.70689e-66	1.51653	0.548	0.094	1.10447e-61	Doublet	DNAJC5
SMARCA2	3.88281e-66	0.823728	0.561	0.099	1.15688e-61	Doublet	SMARCA2
WDFY1	4.49007e-66	0.731353	0.637	0.15	1.33782e-61	Doublet	WDFY1
GPR137B	4.52861e-66	0.536763	0.833	0.278	1.3493e-61	Doublet	GPR137B
PLD3	4.81112e-66	1.06598	0.94	0.504	1.43347e-61	Doublet	PLD3
KIF13B	4.8677e-66	0.5574	0.58	0.11	1.45033e-61	Doublet	KIF13B
NFATC3	4.93727e-66	0.804169	0.558	0.103	1.47106e-61	Doublet	NFATC3
PUM1	5.15202e-66	0.570486	0.705	0.185	1.53505e-61	Doublet	PUM1
CNOT4	5.33357e-66	0.567148	0.738	0.21	1.58914e-61	Doublet	CNOT4
AZIN1	6.10112e-66	0.804102	0.705	0.192	1.81783e-61	Doublet	AZIN1
ZFYVE26	6.41255e-66	1.32545	0.519	0.078	1.91062e-61	Doublet	ZFYVE26
SSPN	6.94638e-66	1.3104	0.642	0.155	2.06967e-61	Doublet	SSPN
NECTIN2	7.08639e-66	0.679852	0.778	0.234	2.11139e-61	Doublet	NECTIN2
SCD	7.92634e-66	0.5541	0.692	0.176	2.36165e-61	Doublet	SCD
CUL5	8.17559e-66	0.603792	0.719	0.19	2.43592e-61	Doublet	CUL5
SUSD1	8.25627e-66	0.675243	0.748	0.219	2.45996e-61	Doublet	SUSD1
GPATCH2	8.44226e-66	1.12935	0.581	0.113	2.51537e-61	Doublet	GPATCH2
BCL6	8.55315e-66	1.10559	0.635	0.147	2.54841e-61	Doublet	BCL6
SRGAP1	9.14876e-66	0.971233	0.613	0.128	2.72587e-61	Doublet	SRGAP1
RPS6KA3	1.35033e-65	0.991833	0.649	0.158	4.0233e-61	Doublet	RPS6KA3
CYP20A1	1.42542e-65	0.825577	0.636	0.142	4.24703e-61	Doublet	CYP20A1
MICU2	1.52607e-65	0.525842	0.705	0.189	4.54692e-61	Doublet	MICU2
ABCA1	1.58833e-65	0.952706	0.935	0.461	4.73242e-61	Doublet	ABCA1
SIGLEC1	2.03854e-65	0.603454	0.617	0.131	6.07383e-61	Doublet	SIGLEC1
LPGAT1	2.05828e-65	0.664922	0.659	0.157	6.13263e-61	Doublet	LPGAT1
EXOC2	2.14955e-65	1.10099	0.512	0.075	6.40458e-61	Doublet	EXOC2
APPBP2	2.16689e-65	0.856516	0.578	0.11	6.45624e-61	Doublet	APPBP2
SLC31A1	2.25186e-65	0.544196	0.793	0.262	6.70943e-61	Doublet	SLC31A1
PPIP5K2	2.25646e-65	0.809902	0.671	0.166	6.72313e-61	Doublet	PPIP5K2
CCL18	2.36186e-65	1.43386	0.666	0.169	7.03717e-61	Doublet	CCL18
ARFGEF1	2.60761e-65	0.620361	0.688	0.175	7.76936e-61	Doublet	ARFGEF1
TNRC6A	2.63625e-65	0.739671	0.594	0.121	7.85469e-61	Doublet	TNRC6A
RDX	2.72729e-65	0.94369	0.911	0.377	8.12595e-61	Doublet	RDX
TRIP12	2.81355e-65	0.659853	0.847	0.288	8.38296e-61	Doublet	TRIP12
NCOR1	3.07365e-65	0.725789	0.849	0.303	9.15793e-61	Doublet	NCOR1
CD86	3.65025e-65	0.611143	0.886	0.337	1.08759e-60	Doublet	CD86
SKIL	4.23003e-65	0.658209	0.869	0.324	1.26034e-60	Doublet	SKIL
CLN8	4.39474e-65	1.0413	0.678	0.171	1.30941e-60	Doublet	CLN8
ARSG	4.76981e-65	1.73322	0.528	0.086	1.42117e-60	Doublet	ARSG
PTK2B	4.79777e-65	1.27832	0.527	0.085	1.4295e-60	Doublet	PTK2B
FUT8	5.51902e-65	0.582871	0.564	0.102	1.64439e-60	Doublet	FUT8
PDSS2	5.55096e-65	0.742971	0.547	0.094	1.65391e-60	Doublet	PDSS2
PRMT2	5.66077e-65	0.515885	0.745	0.212	1.68663e-60	Doublet	PRMT2
GALNT10	5.86566e-65	0.627032	0.515	0.076	1.74767e-60	Doublet	GALNT10
PARN	6.4491e-65	0.505553	0.573	0.106	1.92151e-60	Doublet	PARN
PDE3B	6.57268e-65	1.50144	0.593	0.127	1.95833e-60	Doublet	PDE3B
FAM96B	6.80761e-65	0.66216	0.765	0.188	2.02833e-60	Doublet	FAM96B
FOXP1	7.69402e-65	0.754641	0.624	0.138	2.29243e-60	Doublet	FOXP1
ENG	7.72228e-65	0.804618	0.678	0.166	2.30085e-60	Doublet	ENG
VEGFA	8.17178e-65	0.653203	0.704	0.181	2.43478e-60	Doublet	VEGFA
CREB1	8.70852e-65	0.806191	0.676	0.168	2.5947e-60	Doublet	CREB1
CUL1	1.07731e-64	0.613139	0.632	0.142	3.20986e-60	Doublet	CUL1
TGFBR1	1.15788e-64	0.781021	0.689	0.181	3.4499e-60	Doublet	TGFBR1
CYBRD1	1.41818e-64	0.93228	0.542	0.094	4.22547e-60	Doublet	CYBRD1
RGS12	1.69753e-64	0.863027	0.564	0.107	5.05778e-60	Doublet	RGS12
LILRB2	1.79038e-64	0.973011	0.636	0.147	5.33445e-60	Doublet	LILRB2
PLA2G7	1.79563e-64	1.06559	0.951	0.536	5.35008e-60	Doublet	PLA2G7
ADNP	1.81815e-64	0.871982	0.509	0.076	5.41717e-60	Doublet	ADNP
RAP2A	1.83261e-64	0.840388	0.609	0.131	5.46027e-60	Doublet	RAP2A
ATP13A3	1.9483e-64	0.663981	0.888	0.337	5.80495e-60	Doublet	ATP13A3
PSTPIP2	1.98853e-64	0.553217	0.663	0.151	5.92484e-60	Doublet	PSTPIP2
EPC2	2.18022e-64	0.668622	0.607	0.134	6.49598e-60	Doublet	EPC2
C3	2.50435e-64	0.88466	0.809	0.257	7.46171e-60	Doublet	C3
ADAP2	3.36372e-64	0.601819	0.824	0.264	1.00222e-59	Doublet	ADAP2
CCDC69	3.85243e-64	0.78459	0.671	0.165	1.14783e-59	Doublet	CCDC69
RNF135	3.98889e-64	0.723663	0.699	0.185	1.18849e-59	Doublet	RNF135
ARAP1	4.57106e-64	1.39328	0.604	0.131	1.36195e-59	Doublet	ARAP1
CNOT1	4.81012e-64	0.819562	0.624	0.137	1.43318e-59	Doublet	CNOT1
SCFD1	5.08542e-64	0.576449	0.715	0.196	1.5152e-59	Doublet	SCFD1
GRINA	5.94573e-64	0.812399	0.856	0.296	1.77153e-59	Doublet	GRINA
HIF1A	7.11641e-64	0.969448	0.98	0.649	2.12033e-59	Doublet	HIF1A
SLC29A3	8.42959e-64	0.763151	0.529	0.087	2.5116e-59	Doublet	SLC29A3
STX7	9.1765e-64	0.589769	0.862	0.298	2.73414e-59	Doublet	STX7
MOB1B	1.01822e-63	0.872198	0.627	0.141	3.03377e-59	Doublet	MOB1B
ADAM10	1.09679e-63	0.585917	0.847	0.31	3.26788e-59	Doublet	ADAM10
MGMT	1.22398e-63	0.647501	0.564	0.104	3.64685e-59	Doublet	MGMT
CLOCK	1.4745e-63	0.867121	0.568	0.111	4.39328e-59	Doublet	CLOCK
ICAM1	1.74111e-63	0.605999	0.722	0.206	5.18764e-59	Doublet	ICAM1
CREB3L2	2.39277e-63	1.05335	0.635	0.147	7.12927e-59	Doublet	CREB3L2
ITGAM	2.65967e-63	1.51139	0.555	0.104	7.92448e-59	Doublet	ITGAM
TMEM144	3.48612e-63	0.552716	0.632	0.151	1.03869e-58	Doublet	TMEM144
SIPA1L2	3.80355e-63	0.972814	0.58	0.121	1.13327e-58	Doublet	SIPA1L2
HLA-DPB1	3.81667e-63	0.803457	0.832	0.305	1.13718e-58	Doublet	HLA-DPB1
IL10RA	3.85621e-63	1.0446	0.662	0.164	1.14896e-58	Doublet	IL10RA
GBF1	4.2727e-63	1.42389	0.505	0.08	1.27305e-58	Doublet	GBF1
ABCC3	4.70249e-63	1.6486	0.512	0.085	1.40111e-58	Doublet	ABCC3
COQ2	4.99834e-63	0.780025	0.577	0.114	1.48926e-58	Doublet	COQ2
RNF19B	5.14285e-63	1.66845	0.554	0.104	1.53231e-58	Doublet	RNF19B
SYNGR2	5.15585e-63	0.721214	0.816	0.286	1.53619e-58	Doublet	SYNGR2
ZMYND8	5.39738e-63	0.663435	0.565	0.11	1.60815e-58	Doublet	ZMYND8
PRIM2	6.31372e-63	0.651619	0.538	0.094	1.88117e-58	Doublet	PRIM2
CREBRF	7.253e-63	0.64211	0.66	0.164	2.16103e-58	Doublet	CREBRF
KIAA1551	7.30059e-63	0.989695	0.56	0.104	2.17521e-58	Doublet	KIAA1551
MYO1E	7.56507e-63	0.504721	0.712	0.197	2.25401e-58	Doublet	MYO1E
MGAT1	7.74475e-63	0.680158	0.852	0.293	2.30755e-58	Doublet	MGAT1
PIR	8.28644e-63	0.899591	0.529	0.09	2.46894e-58	Doublet	PIR
ATP6AP1	8.97204e-63	0.615983	0.804	0.271	2.67322e-58	Doublet	ATP6AP1
DPYD	9.61785e-63	0.549431	0.839	0.268	2.86564e-58	Doublet	DPYD
ZC3H12C	1.14126e-62	0.546868	0.643	0.157	3.40038e-58	Doublet	ZC3H12C
UHRF1BP1	1.33215e-62	1.88433	0.511	0.085	3.96914e-58	Doublet	UHRF1BP1
LRRK2	1.34645e-62	0.87572	0.563	0.11	4.01176e-58	Doublet	LRRK2
SERINC2	1.46527e-62	0.512733	0.55	0.096	4.36578e-58	Doublet	SERINC2
ADA2	1.90321e-62	1.54307	0.529	0.09	5.6706e-58	Doublet	ADA2
TWSG1	2.11821e-62	1.09095	0.529	0.092	6.31121e-58	Doublet	TWSG1
CD38	2.16445e-62	0.888676	0.525	0.083	6.44897e-58	Doublet	CD38
IKZF1	2.28958e-62	1.53795	0.558	0.111	6.82181e-58	Doublet	IKZF1
PPP2R5C	2.35722e-62	0.627953	0.689	0.195	7.02332e-58	Doublet	PPP2R5C
HMGXB3	2.94609e-62	0.534719	0.691	0.173	8.77788e-58	Doublet	HMGXB3
LUCAT1	2.97634e-62	0.812822	0.672	0.176	8.86802e-58	Doublet	LUCAT1
CDK5RAP2	4.23173e-62	1.07159	0.586	0.128	1.26084e-57	Doublet	CDK5RAP2
ANKRD12	4.39499e-62	0.6602	0.896	0.333	1.30949e-57	Doublet	ANKRD12
PROCR	4.62684e-62	0.640558	0.761	0.236	1.37857e-57	Doublet	PROCR
ZDHHC17	5.11334e-62	0.539319	0.594	0.124	1.52352e-57	Doublet	ZDHHC17
TNFRSF14	5.31531e-62	0.592538	0.619	0.145	1.5837e-57	Doublet	TNFRSF14
MGLL	5.34176e-62	0.6113	0.847	0.299	1.59158e-57	Doublet	MGLL
WDR11	5.52627e-62	0.824484	0.599	0.128	1.64655e-57	Doublet	WDR11
ZNF804A	5.7532e-62	0.985703	0.501	0.076	1.71417e-57	Doublet	ZNF804A
GNB1	5.96282e-62	0.533817	0.823	0.262	1.77662e-57	Doublet	GNB1
LYZ	6.27864e-62	0.820019	0.783	0.268	1.87072e-57	Doublet	LYZ
MARCH1	6.65626e-62	0.71494	0.64	0.161	1.98323e-57	Doublet	MARCH1
KIAA0232	6.74391e-62	0.816837	0.663	0.173	2.00935e-57	Doublet	KIAA0232
CTSA	6.75819e-62	0.849903	0.895	0.403	2.0136e-57	Doublet	CTSA
LPCAT2	8.27022e-62	0.627318	0.786	0.261	2.46411e-57	Doublet	LPCAT2
CERS6	8.9463e-62	1.04455	0.511	0.08	2.66555e-57	Doublet	CERS6
CDK8	9.38381e-62	1.20633	0.505	0.083	2.7959e-57	Doublet	CDK8
RALGAPA1	1.02715e-61	1.00174	0.583	0.124	3.06039e-57	Doublet	RALGAPA1
MORC3	1.53189e-61	0.597944	0.738	0.214	4.56427e-57	Doublet	MORC3
PSME4	1.6051e-61	0.935236	0.519	0.092	4.78238e-57	Doublet	PSME4
CCDC93	1.76992e-61	0.650306	0.619	0.141	5.27346e-57	Doublet	CCDC93
USP3	2.34651e-61	0.73535	0.738	0.22	6.99143e-57	Doublet	USP3
RBM6	2.39423e-61	0.623783	0.666	0.172	7.13362e-57	Doublet	RBM6
STEAP3	2.4555e-61	0.841095	0.519	0.086	7.31615e-57	Doublet	STEAP3
RAB31	2.46972e-61	0.811368	0.925	0.403	7.35854e-57	Doublet	RAB31
CYB5R4	2.6401e-61	0.685454	0.748	0.23	7.86618e-57	Doublet	CYB5R4
KCTD12	3.05737e-61	0.818462	0.787	0.26	9.10942e-57	Doublet	KCTD12
RNF130	3.11687e-61	0.84889	0.937	0.499	9.2867e-57	Doublet	RNF130
SEC24D	4.01503e-61	0.654925	0.558	0.111	1.19628e-56	Doublet	SEC24D
ZZEF1	4.22736e-61	1.35752	0.514	0.092	1.25954e-56	Doublet	ZZEF1
DNAJC13	4.31087e-61	0.589849	0.645	0.164	1.28442e-56	Doublet	DNAJC13
SGK1	4.3205e-61	0.520792	0.8	0.269	1.28729e-56	Doublet	SGK1
SLC2A3	4.64907e-61	0.801023	0.617	0.142	1.38519e-56	Doublet	SLC2A3
HVCN1	6.62872e-61	0.771771	0.525	0.094	1.97503e-56	Doublet	HVCN1
KCNK13	6.98301e-61	1.67313	0.522	0.096	2.08059e-56	Doublet	KCNK13
ECM1	8.32556e-61	0.730858	0.535	0.096	2.4806e-56	Doublet	ECM1
ROCK1	9.89272e-61	0.58447	0.839	0.299	2.94754e-56	Doublet	ROCK1
SNX27	1.19259e-60	0.792063	0.653	0.166	3.55331e-56	Doublet	SNX27
NIN	1.28878e-60	1.37661	0.551	0.11	3.83991e-56	Doublet	NIN
EIF2AK4	1.42043e-60	0.51747	0.675	0.176	4.23218e-56	Doublet	EIF2AK4
QSOX1	1.52477e-60	0.61935	0.724	0.197	4.54306e-56	Doublet	QSOX1
RALA	1.55909e-60	0.832876	0.928	0.456	4.6453e-56	Doublet	RALA
ADAMTSL1	1.58366e-60	1.22583	0.538	0.1	4.71851e-56	Doublet	ADAMTSL1
HLA-DRA	1.59924e-60	1.12071	0.937	0.561	4.76495e-56	Doublet	HLA-DRA
CD83	1.71366e-60	0.60981	0.902	0.33	5.10584e-56	Doublet	CD83
ZMIZ1	1.97165e-60	0.759567	0.617	0.14	5.87454e-56	Doublet	ZMIZ1
VSIG4	2.27821e-60	0.729028	0.74	0.22	6.78791e-56	Doublet	VSIG4
HERPUD2	2.51066e-60	0.530893	0.538	0.102	7.48052e-56	Doublet	HERPUD2
MKNK1	2.62099e-60	0.743063	0.587	0.131	7.80923e-56	Doublet	MKNK1
NDEL1	2.63348e-60	0.665495	0.56	0.116	7.84645e-56	Doublet	NDEL1
MFSD1	3.05935e-60	0.672779	0.879	0.358	9.11532e-56	Doublet	MFSD1
PCNX4	3.30828e-60	0.826296	0.617	0.152	9.85703e-56	Doublet	PCNX4
TMEM87B	3.48654e-60	0.897773	0.588	0.13	1.03882e-55	Doublet	TMEM87B
VEZT	3.8816e-60	0.876864	0.551	0.11	1.15652e-55	Doublet	VEZT
ARFGEF2	4.65623e-60	1.13041	0.542	0.109	1.38732e-55	Doublet	ARFGEF2
DENND6A	4.75886e-60	0.939162	0.535	0.1	1.4179e-55	Doublet	DENND6A
PGD	5.71496e-60	0.509228	0.807	0.264	1.70277e-55	Doublet	PGD
IFT88	5.81702e-60	0.971532	0.531	0.097	1.73318e-55	Doublet	IFT88
BRD4	6.82113e-60	1.10253	0.596	0.138	2.03236e-55	Doublet	BRD4
NQO2	8.45419e-60	0.680656	0.765	0.24	2.51893e-55	Doublet	NQO2
NFE2L2	1.0652e-59	0.539126	0.869	0.322	3.17377e-55	Doublet	NFE2L2
RPS6KC1	1.58102e-59	0.585308	0.564	0.121	4.71064e-55	Doublet	RPS6KC1
ARID1A	1.62334e-59	0.867701	0.587	0.133	4.83674e-55	Doublet	ARID1A
FYB1	1.7417e-59	0.608087	0.883	0.357	5.18939e-55	Doublet	FYB1
HAVCR2	1.84352e-59	0.605142	0.888	0.346	5.49277e-55	Doublet	HAVCR2
TLE3	2.18429e-59	0.65244	0.558	0.113	6.50809e-55	Doublet	TLE3
EYA3	3.21744e-59	0.506512	0.511	0.086	9.58636e-55	Doublet	EYA3
DSC2	3.64643e-59	0.863667	0.63	0.152	1.08645e-54	Doublet	DSC2
POLK	3.96915e-59	0.683951	0.636	0.155	1.18261e-54	Doublet	POLK
EPB41L2	4.01162e-59	0.596643	0.84	0.302	1.19526e-54	Doublet	EPB41L2
GGA1	4.26886e-59	0.962936	0.645	0.161	1.27191e-54	Doublet	GGA1
DCAF10	4.82854e-59	0.704773	0.534	0.104	1.43866e-54	Doublet	DCAF10
KPNB1	5.20624e-59	0.541358	0.803	0.257	1.5512e-54	Doublet	KPNB1
SIGLEC10	5.76066e-59	0.758406	0.522	0.094	1.71639e-54	Doublet	SIGLEC10
SLC36A4	7.50332e-59	0.830138	0.672	0.186	2.23562e-54	Doublet	SLC36A4
MAPK1	1.0919e-58	0.972048	0.597	0.14	3.25331e-54	Doublet	MAPK1
ARID5B	1.09988e-58	0.612508	0.901	0.365	3.27708e-54	Doublet	ARID5B
SEL1L	1.15148e-58	0.688878	0.75	0.221	3.43083e-54	Doublet	SEL1L
WAPL	1.15656e-58	0.599459	0.722	0.214	3.44598e-54	Doublet	WAPL
SUCLG2	1.17171e-58	0.525461	0.604	0.145	3.49112e-54	Doublet	SUCLG2
FKBP5	1.35993e-58	1.13038	0.544	0.113	4.05191e-54	Doublet	FKBP5
TSPAN14	1.44408e-58	0.764172	0.646	0.165	4.30263e-54	Doublet	TSPAN14
B3GNT2	1.4855e-58	1.14891	0.501	0.087	4.42604e-54	Doublet	B3GNT2
LYPLAL1	1.56176e-58	0.743414	0.606	0.137	4.65328e-54	Doublet	LYPLAL1
OXSR1	1.68753e-58	0.749889	0.629	0.159	5.02799e-54	Doublet	OXSR1
LPIN2	1.71374e-58	0.913645	0.647	0.166	5.10609e-54	Doublet	LPIN2
NOTCH2	1.9544e-58	0.510827	0.653	0.176	5.82315e-54	Doublet	NOTCH2
CYB561A3	2.08225e-58	0.583905	0.633	0.165	6.20406e-54	Doublet	CYB561A3
GPR107	2.08444e-58	1.06211	0.514	0.099	6.21058e-54	Doublet	GPR107
AXL	2.10258e-58	0.988832	0.571	0.123	6.26465e-54	Doublet	AXL
SAMSN1	2.45733e-58	1.01768	0.927	0.45	7.32162e-54	Doublet	SAMSN1
TBC1D1	2.51597e-58	0.75543	0.547	0.111	7.49634e-54	Doublet	TBC1D1
RNF115	2.85454e-58	0.634159	0.665	0.176	8.5051e-54	Doublet	RNF115
MIR3142HG	3.26902e-58	0.572255	0.576	0.127	9.74005e-54	Doublet	MIR3142HG
DNM2	3.83747e-58	0.628355	0.646	0.162	1.14337e-53	Doublet	DNM2
PPP2R5A	4.18739e-58	0.902989	0.508	0.092	1.24763e-53	Doublet	PPP2R5A
RYBP	4.37297e-58	0.744983	0.534	0.107	1.30293e-53	Doublet	RYBP
VPS54	4.47578e-58	1.00629	0.506	0.092	1.33356e-53	Doublet	VPS54
NADK	6.4432e-58	0.609119	0.594	0.134	1.91975e-53	Doublet	NADK
WASHC5	7.03502e-58	1.08383	0.528	0.1	2.09608e-53	Doublet	WASHC5
E2F3	7.86979e-58	1.53727	0.54	0.11	2.3448e-53	Doublet	E2F3
YPEL5	7.90741e-58	0.604756	0.704	0.2	2.35601e-53	Doublet	YPEL5
CSF2RA	9.17447e-58	0.886714	0.643	0.169	2.73353e-53	Doublet	CSF2RA
TANK	9.86959e-58	0.651534	0.873	0.334	2.94065e-53	Doublet	TANK
CWC27	1.08491e-57	0.648262	0.557	0.117	3.2325e-53	Doublet	CWC27
CDK14	1.26161e-57	0.739657	0.528	0.099	3.75895e-53	Doublet	CDK14
KDM7A	1.26983e-57	0.860966	0.541	0.11	3.78347e-53	Doublet	KDM7A
KPNA1	1.27605e-57	0.730586	0.593	0.14	3.80199e-53	Doublet	KPNA1
SPEN	1.28354e-57	0.823841	0.656	0.171	3.82429e-53	Doublet	SPEN
IL10	1.32726e-57	0.706456	0.601	0.148	3.95456e-53	Doublet	IL10
OSBPL11	1.54626e-57	0.537184	0.719	0.205	4.60709e-53	Doublet	OSBPL11
VAV1	1.62055e-57	1.21761	0.578	0.134	4.82844e-53	Doublet	VAV1
GLA	1.63882e-57	0.515978	0.767	0.26	4.88286e-53	Doublet	GLA
APH1B	1.66967e-57	0.554937	0.791	0.269	4.97477e-53	Doublet	APH1B
SIL1	2.4197e-57	0.615403	0.62	0.158	7.20949e-53	Doublet	SIL1
ARMC8	2.86331e-57	1.02592	0.529	0.104	8.53123e-53	Doublet	ARMC8
HLA-DQA1	3.15804e-57	0.790695	0.846	0.33	9.40937e-53	Doublet	HLA-DQA1
PDCD4	3.67511e-57	0.573886	0.537	0.109	1.095e-52	Doublet	PDCD4
RIN2	3.74776e-57	0.503721	0.694	0.199	1.11664e-52	Doublet	RIN2
KLHDC8B	4.31966e-57	0.625213	0.574	0.121	1.28704e-52	Doublet	KLHDC8B
UBE2G1	4.37536e-57	0.57975	0.571	0.127	1.30364e-52	Doublet	UBE2G1
MIDN	4.54757e-57	0.679387	0.584	0.135	1.35495e-52	Doublet	MIDN
SMIM14	4.6764e-57	0.63651	0.616	0.151	1.39333e-52	Doublet	SMIM14
ZFR	5.00743e-57	0.5501	0.74	0.226	1.49196e-52	Doublet	ZFR
TLR2	5.74194e-57	0.772575	0.776	0.248	1.71081e-52	Doublet	TLR2
SENP5	8.0813e-57	0.543511	0.542	0.111	2.40782e-52	Doublet	SENP5
MR1	8.14401e-57	0.581209	0.607	0.145	2.42651e-52	Doublet	MR1
ARHGAP17	8.94448e-57	0.916229	0.517	0.1	2.66501e-52	Doublet	ARHGAP17
GPR34	1.20143e-56	0.565924	0.61	0.142	3.57966e-52	Doublet	GPR34
TCF7L2	1.26427e-56	0.502774	0.567	0.12	3.7669e-52	Doublet	TCF7L2
XPO6	1.4156e-56	0.649518	0.542	0.113	4.21779e-52	Doublet	XPO6
CHCHD3	1.81542e-56	0.533592	0.653	0.178	5.40903e-52	Doublet	CHCHD3
SH2B3	1.83118e-56	1.05742	0.548	0.121	5.45601e-52	Doublet	SH2B3
ADAMDEC1	2.13111e-56	0.639813	0.81	0.275	6.34965e-52	Doublet	ADAMDEC1
SAMD8	2.1558e-56	1.08403	0.535	0.109	6.42322e-52	Doublet	SAMD8
DPP8	2.20901e-56	1.03021	0.541	0.114	6.58175e-52	Doublet	DPP8
TGM2	2.26562e-56	0.915364	0.816	0.305	6.75042e-52	Doublet	TGM2
TRAPPC10	2.30632e-56	0.513723	0.537	0.114	6.87168e-52	Doublet	TRAPPC10
SNRPD3	2.65318e-56	0.516467	0.702	0.181	7.90516e-52	Doublet	SNRPD3
TLK2	2.81645e-56	0.53253	0.613	0.154	8.3916e-52	Doublet	TLK2
CD74	2.87994e-56	1.01498	0.937	0.522	8.58079e-52	Doublet	CD74
HK1	3.81577e-56	0.673361	0.63	0.161	1.13691e-51	Doublet	HK1
CPSF2	4.06192e-56	0.846064	0.565	0.128	1.21025e-51	Doublet	CPSF2
HSD17B14	4.23088e-56	0.514901	0.692	0.195	1.26059e-51	Doublet	HSD17B14
SNCA	6.04556e-56	0.515663	0.771	0.261	1.80128e-51	Doublet	SNCA
SAMD9L	6.97557e-56	0.570094	0.689	0.193	2.07837e-51	Doublet	SAMD9L
LILRA5	7.805e-56	0.868675	0.561	0.12	2.3255e-51	Doublet	LILRA5
PPP1R15B	1.03636e-55	0.902086	0.553	0.12	3.08784e-51	Doublet	PPP1R15B
N4BP2L2	1.31058e-55	0.54516	0.868	0.334	3.90486e-51	Doublet	N4BP2L2
CKAP5	1.53738e-55	0.541202	0.514	0.1	4.58062e-51	Doublet	CKAP5
NHLRC3	1.55576e-55	0.701209	0.557	0.121	4.63538e-51	Doublet	NHLRC3
ALDH2	2.00357e-55	0.525267	0.557	0.118	5.96963e-51	Doublet	ALDH2
ZNF131	2.09391e-55	0.889939	0.518	0.104	6.2388e-51	Doublet	ZNF131
EHMT1	2.3089e-55	0.93508	0.532	0.113	6.87936e-51	Doublet	EHMT1
RAMMET	2.86517e-55	0.708419	0.56	0.118	8.53678e-51	Doublet	RAMMET
TTC37	3.19737e-55	0.910036	0.584	0.142	9.52658e-51	Doublet	TTC37
NR4A2	4.40919e-55	0.700062	0.512	0.099	1.31372e-50	Doublet	NR4A2
MINOS1	4.55025e-55	1.07383	0.586	0.138	1.35575e-50	Doublet	MINOS1
CD300A	5.10517e-55	0.606264	0.656	0.175	1.52108e-50	Doublet	CD300A
RANBP2	6.93413e-55	0.604414	0.614	0.158	2.06602e-50	Doublet	RANBP2
CRLF3	1.25651e-54	0.65555	0.554	0.126	3.74376e-50	Doublet	CRLF3
GNA15	1.38605e-54	1.16798	0.521	0.106	4.12973e-50	Doublet	GNA15
CCR1	1.67573e-54	0.595992	0.796	0.267	4.99283e-50	Doublet	CCR1
CPPED1	1.70149e-54	0.884277	0.594	0.147	5.06959e-50	Doublet	CPPED1
XIAP	1.73326e-54	0.586094	0.652	0.179	5.16425e-50	Doublet	XIAP
MAPK8	1.95263e-54	0.755282	0.541	0.118	5.81787e-50	Doublet	MAPK8
WDR33	2.48202e-54	1.12046	0.563	0.131	7.39519e-50	Doublet	WDR33
MFSD14B	2.98185e-54	0.645723	0.505	0.1	8.88443e-50	Doublet	MFSD14B
C1QC	3.55662e-54	0.842587	0.955	0.622	1.0597e-49	Doublet	C1QC
CHIC2	3.85349e-54	0.575097	0.576	0.137	1.14815e-49	Doublet	CHIC2
LINC01094	3.91217e-54	0.662683	0.709	0.216	1.16563e-49	Doublet	LINC01094
SLA	5.19777e-54	0.582516	0.879	0.33	1.54868e-49	Doublet	SLA
RAB28	5.55793e-54	0.648858	0.504	0.099	1.65599e-49	Doublet	RAB28
SCARB2	5.92134e-54	0.57951	0.892	0.374	1.76426e-49	Doublet	SCARB2
WAS	6.08711e-54	0.528338	0.65	0.178	1.81366e-49	Doublet	WAS
PPP3CB	6.20061e-54	0.534436	0.557	0.13	1.84747e-49	Doublet	PPP3CB
PTPRC	7.85841e-54	0.731813	0.921	0.417	2.34141e-49	Doublet	PTPRC
INTS6	1.00074e-53	0.620198	0.57	0.142	2.98172e-49	Doublet	INTS6
CHD8	1.10602e-53	0.701268	0.599	0.151	3.2954e-49	Doublet	CHD8
PATL1	1.30445e-53	0.551985	0.619	0.161	3.88662e-49	Doublet	PATL1
PARVG	1.35331e-53	0.546872	0.56	0.128	4.0322e-49	Doublet	PARVG
PRKAR2A	1.462e-53	0.55798	0.545	0.116	4.35602e-49	Doublet	PRKAR2A
CTBP2	1.56544e-53	0.691781	0.587	0.141	4.66423e-49	Doublet	CTBP2
HNRNPLL	1.65351e-53	0.959365	0.505	0.1	4.92663e-49	Doublet	HNRNPLL
GAPLINC	2.33541e-53	0.599811	0.548	0.121	6.95836e-49	Doublet	GAPLINC
TMEM127	3.34172e-53	0.659647	0.554	0.126	9.95664e-49	Doublet	TMEM127
B3GNT5	4.12835e-53	0.787394	0.584	0.144	1.23004e-48	Doublet	B3GNT5
TRAF3IP3	4.30529e-53	0.811486	0.505	0.1	1.28276e-48	Doublet	TRAF3IP3
CWF19L2	4.4882e-53	0.683951	0.528	0.111	1.33726e-48	Doublet	CWF19L2
NAIP	4.75712e-53	1.09413	0.502	0.099	1.41738e-48	Doublet	NAIP
ARHGAP30	5.91774e-53	1.10127	0.584	0.147	1.76319e-48	Doublet	ARHGAP30
AAED1	7.26477e-53	1.19778	0.506	0.099	2.16454e-48	Doublet	AAED1
GGA2	7.78099e-53	0.554575	0.596	0.154	2.31835e-48	Doublet	GGA2
ENOSF1	8.90221e-53	1.09556	0.581	0.151	2.65241e-48	Doublet	ENOSF1
FAM120A	9.65851e-53	0.520077	0.578	0.141	2.87775e-48	Doublet	FAM120A
IL7R	1.3403e-52	0.861225	0.534	0.117	3.99341e-48	Doublet	IL7R
PTPMT1	1.6057e-52	0.544924	0.555	0.123	4.78419e-48	Doublet	PTPMT1
HADHB	1.96482e-52	0.587819	0.718	0.227	5.85417e-48	Doublet	HADHB
ZNF518A	2.12428e-52	0.964706	0.527	0.116	6.32929e-48	Doublet	ZNF518A
TROVE2	2.16549e-52	1.39071	0.501	0.103	6.45209e-48	Doublet	TROVE2
SMG7	2.63892e-52	0.697066	0.502	0.103	7.86265e-48	Doublet	SMG7
GAPVD1	2.68807e-52	0.532603	0.581	0.142	8.0091e-48	Doublet	GAPVD1
FBXO34	2.72907e-52	0.83642	0.505	0.103	8.13126e-48	Doublet	FBXO34
RAB11FIP1	2.75889e-52	0.602876	0.591	0.15	8.22012e-48	Doublet	RAB11FIP1
TM6SF1	3.25116e-52	0.719915	0.521	0.11	9.68684e-48	Doublet	TM6SF1
AHCTF1	4.76845e-52	1.1039	0.511	0.107	1.42076e-47	Doublet	AHCTF1
AC022509.2	4.89941e-52	0.840655	0.637	0.181	1.45978e-47	Doublet	AC022509.2
GRN	5.69353e-52	0.774079	0.932	0.495	1.69639e-47	Doublet	GRN
MPP5	7.73591e-52	0.643526	0.508	0.102	2.30491e-47	Doublet	MPP5
SLAIN2	8.24083e-52	0.599493	0.666	0.192	2.45536e-47	Doublet	SLAIN2
GALNT7	9.32489e-52	1.02237	0.506	0.104	2.77835e-47	Doublet	GALNT7
PPP4R1	1.7757e-51	0.858335	0.529	0.118	5.29069e-47	Doublet	PPP4R1
OPA1	2.28142e-51	0.568345	0.514	0.114	6.7975e-47	Doublet	OPA1
TNPO3	3.17573e-51	0.504373	0.537	0.128	9.4621e-47	Doublet	TNPO3
CD226	3.53715e-51	0.658511	0.797	0.292	1.05389e-46	Doublet	CD226
LASP1	3.56985e-51	0.506125	0.573	0.145	1.06364e-46	Doublet	LASP1
CTSC	4.19221e-51	0.620076	0.847	0.357	1.24907e-46	Doublet	CTSC
KIDINS220	5.2249e-51	0.501801	0.645	0.179	1.55676e-46	Doublet	KIDINS220
DDX60L	5.40147e-51	0.531802	0.771	0.254	1.60937e-46	Doublet	DDX60L
SDS	6.90171e-51	0.845959	0.784	0.291	2.05636e-46	Doublet	SDS
LILRB4	1.1447e-50	0.585668	0.899	0.381	3.41062e-46	Doublet	LILRB4
TNFAIP3	1.22267e-50	0.63068	0.729	0.237	3.64294e-46	Doublet	TNFAIP3
GLYR1	1.23229e-50	0.784214	0.563	0.14	3.6716e-46	Doublet	GLYR1
ZFP36L1	1.53601e-50	0.649088	0.905	0.378	4.57654e-46	Doublet	ZFP36L1
MSR1	1.69913e-50	0.804592	0.967	0.564	5.06257e-46	Doublet	MSR1
HS3ST1	1.99647e-50	1.08738	0.551	0.131	5.94849e-46	Doublet	HS3ST1
FOXN2	2.94751e-50	1.02726	0.501	0.111	8.78211e-46	Doublet	FOXN2
LITAF	4.50813e-50	0.509131	0.892	0.368	1.3432e-45	Doublet	LITAF
ETV5	6.50703e-50	0.539537	0.601	0.169	1.93877e-45	Doublet	ETV5
MS4A4A	8.24778e-50	0.633429	0.892	0.395	2.45743e-45	Doublet	MS4A4A
ACSL1	1.72338e-49	0.715782	0.894	0.364	5.13482e-45	Doublet	ACSL1
KMT2A	1.87897e-49	0.614352	0.537	0.131	5.5984e-45	Doublet	KMT2A
CLCN3	2.03802e-49	0.597813	0.501	0.106	6.07227e-45	Doublet	CLCN3
DDX60	3.6003e-49	0.533605	0.56	0.138	1.07271e-44	Doublet	DDX60
FAM49B	4.88012e-49	0.528985	0.921	0.439	1.45403e-44	Doublet	FAM49B
NUTM2B-AS1	6.0951e-49	0.701952	0.518	0.121	1.81604e-44	Doublet	NUTM2B-AS1
RAB10	6.44881e-49	0.600397	0.922	0.433	1.92142e-44	Doublet	RAB10
SCYL2	6.94905e-49	0.571195	0.537	0.128	2.07047e-44	Doublet	SCYL2
APOL6	8.35132e-49	0.817006	0.587	0.158	2.48828e-44	Doublet	APOL6
MTRNR2L1	2.5966e-48	0.535739	0.912	0.379	7.73656e-44	Doublet	MTRNR2L1
PLEKHF2	2.68599e-48	0.79959	0.554	0.141	8.00291e-44	Doublet	PLEKHF2
ATE1	2.71809e-48	0.500949	0.509	0.117	8.09854e-44	Doublet	ATE1
CHMP1B	3.03257e-48	0.515184	0.535	0.131	9.03555e-44	Doublet	CHMP1B
[truncated: 43 more rows]
